# Supplementary material for: Glycosylated IgG antibodies contribute to the recovery of haemorrhagic fever with renal syndrome patients
Source: bioRxiv preprint, doi:10.1101/2025.04.11.648365, version 6 (2025-12-04)
Supplement: Supplementary file 2 [file 648365_file10.xlsx]

## Sheet: sheet 1
Supplementary file 2. Difference in main IgG glycome features of HFRS patients between age groups
Summary glycans	≤44 (n=26)	45-59 (n=18)	≥60 (n=21)	Z	P
Fucosylation	94.245 (93.508, 94.688)	94.785 (93.783, 95.353)	93.960 (93.185, 94.795)	3.883	0.143
Bisecting GlcNAc	15.69 (13.765, 16.565)	15.695 (14.623, 17.290)	16.290 (14.550, 17.970)	1.923	0.382
Galactosylation	76.555 (73.645, 79.563)	72.180 (68.978, 75.213)	73.260 (70.840, 77.030)	13.69	0.001
Sialylation	22.980 (21.400, 27.410)	20.930 (20.075, 23.095)	22.900 (21.640, 24.670)	4.787	0.091
