# Supplementary material for: Glycosylated IgG antibodies contribute to the recovery of haemorrhagic fever with renal syndrome patients
Source: bioRxiv preprint, doi:10.1101/2025.04.11.648365, version 6 (2025-12-04)
Supplement: Supplementary file 9 [file 648365_file17.xlsx]

## Sheet: sheet 1
Supplementary file 9. Differentially expressed genes among different B cell subgroups in healthy and acute HFRS groups
gene	p_val	avg_log2FC	pct.1	pct.2	p_val_adj	deg_type	vs
FOS	4.19891e-75	1.99818	0.433	0.067	8.96509e-71	naive B	HTNVvsHealth
KLF6	6.64213e-84	1.63128	0.728	0.306	1.41816e-79	naive B	HTNVvsHealth
CD69	3.116e-70	1.60811	0.677	0.286	6.65297e-66	naive B	HTNVvsHealth
TSC22D3	2.37742e-148	1.5724	0.99	0.761	5.07603e-144	naive B	HTNVvsHealth
PPP1R15A	8.07646e-62	1.54801	0.486	0.133	1.72441e-57	naive B	HTNVvsHealth
DUSP1	3.13951e-80	1.37362	0.819	0.43	6.70317e-76	naive B	HTNVvsHealth
CD83	3.09729e-51	1.35856	0.501	0.173	6.61302e-47	naive B	HTNVvsHealth
NEAT1	1.25034e-60	1.33539	0.477	0.125	2.6696e-56	naive B	HTNVvsHealth
STAG3	5.06689e-53	1.2755	0.479	0.141	1.08183e-48	naive B	HTNVvsHealth
RPLP0	1.04336e-58	1.21157	0.674	0.364	2.22767e-54	naive B	HTNVvsHealth
RPS19	6.25468e-57	1.18077	0.678	0.364	1.33544e-52	naive B	HTNVvsHealth
RPS3	1.60154e-59	1.16319	0.68	0.364	3.41946e-55	naive B	HTNVvsHealth
RPL36	1.90762e-52	1.10293	0.673	0.362	4.07295e-48	naive B	HTNVvsHealth
JUN	3.44507e-36	1.08464	0.685	0.398	7.35557e-32	naive B	HTNVvsHealth
RPL14	1.90953e-49	1.03929	0.677	0.362	4.07704e-45	naive B	HTNVvsHealth
RPL13A	1.22348e-46	1.03606	0.668	0.36	2.61224e-42	naive B	HTNVvsHealth
RPSA	9.63039e-44	1.00986	0.667	0.361	2.05618e-39	naive B	HTNVvsHealth
RPLP1	1.35092e-45	1.00312	0.679	0.364	2.88435e-41	naive B	HTNVvsHealth
RPS25	1.69694e-47	1.00039	0.676	0.364	3.62314e-43	naive B	HTNVvsHealth
RPS16	3.68412e-45	0.991071	0.673	0.362	7.86597e-41	naive B	HTNVvsHealth
TXNIP	5.2557e-96	0.987993	0.993	0.96	1.12215e-91	naive B	HTNVvsHealth
NFKBIA	2.92521e-23	0.987356	0.693	0.477	6.24561e-19	naive B	HTNVvsHealth
RPL28	1.99252e-45	0.980332	0.679	0.364	4.25422e-41	naive B	HTNVvsHealth
RPL7	1.11042e-42	0.980183	0.633	0.344	2.37085e-38	naive B	HTNVvsHealth
RPL11	2.9759e-45	0.972827	0.675	0.364	6.35384e-41	naive B	HTNVvsHealth
RPL10	3.65932e-43	0.972278	0.678	0.364	7.81302e-39	naive B	HTNVvsHealth
RPS11	3.23314e-43	0.971978	0.658	0.36	6.90307e-39	naive B	HTNVvsHealth
RPL7A	2.03933e-44	0.963141	0.679	0.364	4.35418e-40	naive B	HTNVvsHealth
RPS13	3.29973e-42	0.956947	0.678	0.364	7.04524e-38	naive B	HTNVvsHealth
RPL30	1.45364e-43	0.951682	0.678	0.364	3.10367e-39	naive B	HTNVvsHealth
RPS15	3.12621e-43	0.94582	0.678	0.364	6.67478e-39	naive B	HTNVvsHealth
RPL29	2.94797e-43	0.944278	0.678	0.364	6.29421e-39	naive B	HTNVvsHealth
RPL23A	5.15536e-41	0.941946	0.672	0.362	1.10072e-36	naive B	HTNVvsHealth
PELI1	8.30295e-38	0.939074	0.359	0.103	1.77276e-33	naive B	HTNVvsHealth
RPL13	6.67955e-42	0.936521	0.68	0.364	1.42615e-37	naive B	HTNVvsHealth
RPS14	3.64968e-42	0.936396	0.678	0.362	7.79242e-38	naive B	HTNVvsHealth
RPS18	7.02257e-40	0.931942	0.677	0.364	1.49939e-35	naive B	HTNVvsHealth
RPL31	1.17568e-38	0.927099	0.633	0.343	2.51019e-34	naive B	HTNVvsHealth
RPS15A	6.19805e-40	0.920602	0.679	0.364	1.32335e-35	naive B	HTNVvsHealth
RPS5	2.52588e-40	0.920176	0.674	0.364	5.39301e-36	naive B	HTNVvsHealth
RPL5	2.73434e-40	0.916208	0.67	0.364	5.8381e-36	naive B	HTNVvsHealth
MT-CO2	1.74052e-32	0.910122	0.68	0.364	3.71619e-28	naive B	HTNVvsHealth
RPL27A	4.58768e-34	0.9098	0.596	0.335	9.79516e-30	naive B	HTNVvsHealth
RPL19	5.27539e-40	0.909429	0.68	0.364	1.12635e-35	naive B	HTNVvsHealth
RPS27A	7.72125e-39	0.904463	0.68	0.364	1.64857e-34	naive B	HTNVvsHealth
RPS2	6.92522e-39	0.901871	0.677	0.364	1.4786e-34	naive B	HTNVvsHealth
RPL18	1.13961e-39	0.893253	0.678	0.364	2.43319e-35	naive B	HTNVvsHealth
RPS17	1.81087e-36	0.889189	0.534	0.268	3.8664e-32	naive B	HTNVvsHealth
RPS28	9.40497e-37	0.88126	0.677	0.364	2.00805e-32	naive B	HTNVvsHealth
RPL18A	1.01787e-37	0.880783	0.679	0.364	2.17325e-33	naive B	HTNVvsHealth
RPS7	1.43211e-38	0.877985	0.675	0.364	3.0577e-34	naive B	HTNVvsHealth
RPS12	2.07643e-36	0.867231	0.679	0.364	4.43339e-32	naive B	HTNVvsHealth
RPL24	1.02514e-35	0.862468	0.663	0.364	2.18877e-31	naive B	HTNVvsHealth
RPL3	6.30581e-36	0.859801	0.679	0.362	1.34635e-31	naive B	HTNVvsHealth
RPS23	1.46118e-34	0.859651	0.679	0.364	3.11976e-30	naive B	HTNVvsHealth
RPL17	9.06678e-37	0.857557	0.669	0.362	1.93585e-32	naive B	HTNVvsHealth
RPS6	8.40443e-35	0.841706	0.675	0.364	1.79443e-30	naive B	HTNVvsHealth
FKBP5	3.9574e-32	0.823302	0.254	0.054	8.44944e-28	naive B	HTNVvsHealth
RPS9	1.91033e-34	0.822576	0.671	0.364	4.07874e-30	naive B	HTNVvsHealth
JUND	1.85547e-29	0.818531	0.292	0.087	3.96161e-25	naive B	HTNVvsHealth
RPL26	6.00304e-33	0.810042	0.677	0.364	1.28171e-28	naive B	HTNVvsHealth
RPS27	4.23658e-31	0.809898	0.679	0.364	9.04552e-27	naive B	HTNVvsHealth
RPL35A	1.52607e-33	0.805775	0.675	0.364	3.25832e-29	naive B	HTNVvsHealth
RPL35	2.71545e-33	0.801448	0.667	0.361	5.79775e-29	naive B	HTNVvsHealth
RPLP2	3.56755e-32	0.80022	0.679	0.364	7.61708e-28	naive B	HTNVvsHealth
RPL39	2.41416e-30	0.790299	0.679	0.364	5.15448e-26	naive B	HTNVvsHealth
RPL32	1.42917e-29	0.790027	0.677	0.364	3.05143e-25	naive B	HTNVvsHealth
JUNB	2.34252e-17	0.785606	0.719	0.54	5.00151e-13	naive B	HTNVvsHealth
RPS24	4.30907e-32	0.781552	0.675	0.364	9.2003e-28	naive B	HTNVvsHealth
RPL37A	1.14767e-31	0.77672	0.672	0.359	2.45039e-27	naive B	HTNVvsHealth
TP53INP1	3.67739e-32	0.767178	0.34	0.102	7.85159e-28	naive B	HTNVvsHealth
RPS4X	3.99366e-32	0.76111	0.676	0.364	8.52687e-28	naive B	HTNVvsHealth
MT-ND4L	9.83433e-27	0.760144	0.678	0.364	2.09973e-22	naive B	HTNVvsHealth
RPL27	5.82736e-31	0.759344	0.649	0.358	1.2442e-26	naive B	HTNVvsHealth
RPL15	4.99478e-31	0.758326	0.672	0.364	1.06643e-26	naive B	HTNVvsHealth
CRIP1	2.5475e-27	0.746852	0.481	0.228	5.43917e-23	naive B	HTNVvsHealth
RPL34	3.35096e-27	0.744077	0.678	0.364	7.15463e-23	naive B	HTNVvsHealth
RPS8	4.38553e-28	0.743266	0.679	0.364	9.36354e-24	naive B	HTNVvsHealth
YBX3	8.14595e-36	0.742978	0.644	0.342	1.73924e-31	naive B	HTNVvsHealth
RPL10A	5.41399e-30	0.740519	0.665	0.361	1.15594e-25	naive B	HTNVvsHealth
RPL36AL	2.23513e-25	0.736143	0.503	0.282	4.77223e-21	naive B	HTNVvsHealth
RPS21	7.32551e-28	0.735608	0.678	0.364	1.56407e-23	naive B	HTNVvsHealth
UBC	1.34825e-28	0.728743	0.926	0.768	2.87864e-24	naive B	HTNVvsHealth
RPS3A	1.11788e-27	0.723645	0.678	0.364	2.38678e-23	naive B	HTNVvsHealth
RPL9	7.70195e-28	0.711392	0.67	0.361	1.64444e-23	naive B	HTNVvsHealth
RPL38	4.42215e-29	0.709121	0.645	0.354	9.44173e-25	naive B	HTNVvsHealth
PMAIP1	1.23481e-25	0.707479	0.264	0.079	2.63645e-21	naive B	HTNVvsHealth
RPS4Y1	8.46385e-30	0.70452	0.583	0.296	1.80712e-25	naive B	HTNVvsHealth
RPL8	2.66777e-26	0.699755	0.678	0.364	5.69596e-22	naive B	HTNVvsHealth
RPL37	3.47259e-25	0.694491	0.677	0.364	7.41433e-21	naive B	HTNVvsHealth
RPS20	3.21905e-25	0.694273	0.548	0.313	6.873e-21	naive B	HTNVvsHealth
GADD45B	1.0844e-14	0.690122	0.341	0.186	2.31531e-10	naive B	HTNVvsHealth
CFLAR	1.62444e-24	0.684977	0.28	0.092	3.46835e-20	naive B	HTNVvsHealth
RPL4	1.81848e-27	0.684213	0.638	0.354	3.88263e-23	naive B	HTNVvsHealth
IRF1	1.59735e-19	0.660459	0.479	0.26	3.4105e-15	naive B	HTNVvsHealth
FAM129C	1.29236e-19	0.652836	0.467	0.264	2.75933e-15	naive B	HTNVvsHealth
RPL22	6.7552e-25	0.644604	0.672	0.364	1.4423e-20	naive B	HTNVvsHealth
ATP5G2	1.62862e-24	0.639904	0.539	0.307	3.47728e-20	naive B	HTNVvsHealth
MT-CYB	7.47474e-23	0.63392	0.678	0.364	1.59593e-18	naive B	HTNVvsHealth
HERPUD1	2.22227e-14	0.628523	0.493	0.311	4.74477e-10	naive B	HTNVvsHealth
YPEL5	8.20514e-23	0.619896	0.37	0.164	1.75188e-18	naive B	HTNVvsHealth
SLC2A3	8.68698e-21	0.616267	0.257	0.088	1.85476e-16	naive B	HTNVvsHealth
RPL12	5.01514e-22	0.610633	0.674	0.364	1.07078e-17	naive B	HTNVvsHealth
RPL6	4.02301e-23	0.603433	0.669	0.364	8.58954e-19	naive B	HTNVvsHealth
RPL23	2.62071e-18	0.601156	0.498	0.306	5.59547e-14	naive B	HTNVvsHealth
PIK3IP1	9.79778e-27	0.600737	0.473	0.217	2.09192e-22	naive B	HTNVvsHealth
RPL21	3.60277e-22	0.599476	0.669	0.364	7.69228e-18	naive B	HTNVvsHealth
IFITM1	9.63198e-41	0.593566	0.622	0.282	2.05652e-36	naive B	HTNVvsHealth
GABPB1	1.21679e-20	0.590589	0.347	0.159	2.59798e-16	naive B	HTNVvsHealth
SAT1	7.83491e-21	0.575234	0.557	0.321	1.67283e-16	naive B	HTNVvsHealth
ATP5L	5.51456e-21	0.574541	0.5	0.282	1.17741e-16	naive B	HTNVvsHealth
2025-09-09	1.07434e-15	0.561495	0.307	0.154	2.29383e-11	naive B	HTNVvsHealth
ATP5E	3.52313e-20	0.55624	0.591	0.353	7.52223e-16	naive B	HTNVvsHealth
EIF1B	1.66275e-25	0.555782	0.608	0.334	3.55014e-21	naive B	HTNVvsHealth
2025-09-07	2.36619e-16	0.549851	0.408	0.234	5.05206e-12	naive B	HTNVvsHealth
SBDS	2.09859e-24	0.548948	0.305	0.104	4.48069e-20	naive B	HTNVvsHealth
MT-ATP6	1.82655e-22	0.546216	0.662	0.362	3.89986e-18	naive B	HTNVvsHealth
TRA2B	8.47518e-22	0.540356	0.522	0.286	1.80954e-17	naive B	HTNVvsHealth
HLA-C	1.11683e-45	0.528264	0.993	0.901	2.38454e-41	naive B	HTNVvsHealth
ATP5D	1.86668e-16	0.514266	0.347	0.18	3.98555e-12	naive B	HTNVvsHealth
RCSD1	1.51546e-22	0.511751	0.844	0.61	3.23565e-18	naive B	HTNVvsHealth
MT-ND4	3.25983e-21	0.496326	0.643	0.358	6.96005e-17	naive B	HTNVvsHealth
RPL22L1	3.68655e-13	0.491717	0.339	0.196	7.87116e-09	naive B	HTNVvsHealth
SRSF10	2.43473e-25	0.488534	0.59	0.333	5.19839e-21	naive B	HTNVvsHealth
MT-CO3	2.63254e-16	0.485132	0.68	0.364	5.62074e-12	naive B	HTNVvsHealth
2025-09-06	1.91007e-11	0.483962	0.309	0.18	4.0782e-07	naive B	HTNVvsHealth
MT-ND2	1.84929e-21	0.477706	0.645	0.358	3.94842e-17	naive B	HTNVvsHealth
DDX21	6.27185e-14	0.473169	0.283	0.14	1.3391e-09	naive B	HTNVvsHealth
IER2	0.000261792	0.471636	0.355	0.283	1	naive B	HTNVvsHealth
ZFP36	4.77203e-13	0.47147	0.665	0.476	1.01888e-08	naive B	HTNVvsHealth
PTPN1	3.83078e-17	0.4712	0.351	0.178	8.17909e-13	naive B	HTNVvsHealth
HLA-B	2.5771e-44	0.471025	0.998	0.979	5.50238e-40	naive B	HTNVvsHealth
TUBA1A	8.23901e-16	0.469012	0.508	0.311	1.75911e-11	naive B	HTNVvsHealth
SESN1	5.26268e-15	0.465974	0.392	0.212	1.12363e-10	naive B	HTNVvsHealth
PTPRCAP	1.51555e-25	0.46276	0.927	0.696	3.23584e-21	naive B	HTNVvsHealth
SON	4.18581e-18	0.457055	0.713	0.489	8.93713e-14	naive B	HTNVvsHealth
MAP3K8	1.95661e-13	0.450947	0.383	0.213	4.17755e-09	naive B	HTNVvsHealth
EZR	6.69272e-13	0.450698	0.703	0.513	1.42896e-08	naive B	HTNVvsHealth
DDIT4	7.90967e-12	0.449893	0.316	0.173	1.68879e-07	naive B	HTNVvsHealth
PDE4B	1.46331e-16	0.445178	0.426	0.239	3.12431e-12	naive B	HTNVvsHealth
ZFP36L2	1.17499e-20	0.44296	0.883	0.701	2.50872e-16	naive B	HTNVvsHealth
MT-ND3	2.05507e-14	0.435704	0.68	0.364	4.38777e-10	naive B	HTNVvsHealth
LY6E	2.59779e-23	0.430832	0.687	0.432	5.54655e-19	naive B	HTNVvsHealth
ATPIF1	2.0277e-11	0.429514	0.288	0.161	4.32933e-07	naive B	HTNVvsHealth
RPS29	6.41256e-17	0.426883	0.67	0.362	1.36914e-12	naive B	HTNVvsHealth
MALAT1	2.38981e-31	0.425736	0.999	0.998	5.10248e-27	naive B	HTNVvsHealth
CXCR4	2.16537e-22	0.42024	0.928	0.772	4.62329e-18	naive B	HTNVvsHealth
ATP5G3	1.20247e-10	0.408958	0.258	0.142	2.5674e-06	naive B	HTNVvsHealth
MZB1	1.55415e-13	0.405777	0.313	0.159	3.31828e-09	naive B	HTNVvsHealth
RNMT	3.64603e-16	0.405397	0.274	0.116	7.78463e-12	naive B	HTNVvsHealth
ATP5B	1.05128e-08	0.399307	0.289	0.183	0.000224459	naive B	HTNVvsHealth
HIST1H4C	2.88979e-12	0.394106	0.466	0.29	6.16999e-08	naive B	HTNVvsHealth
CCND3	4.80886e-18	0.386107	0.68	0.439	1.02674e-13	naive B	HTNVvsHealth
IQGAP1	5.56651e-15	0.38498	0.424	0.239	1.18851e-10	naive B	HTNVvsHealth
G3BP2	5.49795e-16	0.383981	0.31	0.142	1.17387e-11	naive B	HTNVvsHealth
CYCS	4.4021e-13	0.382971	0.324	0.166	9.39891e-09	naive B	HTNVvsHealth
GLO1	1.17562e-16	0.379406	0.452	0.252	2.51006e-12	naive B	HTNVvsHealth
CCNL1	3.47628e-14	0.376419	0.438	0.257	7.42221e-10	naive B	HTNVvsHealth
RBM39	1.42653e-14	0.374318	0.638	0.443	3.04579e-10	naive B	HTNVvsHealth
PET100	1.18666e-11	0.370968	0.396	0.247	2.53364e-07	naive B	HTNVvsHealth
IGKC	1.44826e-11	0.370257	0.482	0.307	3.09219e-07	naive B	HTNVvsHealth
MT-ATP8	5.24617e-16	0.367662	0.677	0.364	1.12011e-11	naive B	HTNVvsHealth
TNRC6B	1.66392e-16	0.364907	0.388	0.197	3.55264e-12	naive B	HTNVvsHealth
IDS	4.36479e-12	0.361589	0.252	0.123	9.31926e-08	naive B	HTNVvsHealth
HIF1A	5.40836e-16	0.361068	0.375	0.19	1.15474e-11	naive B	HTNVvsHealth
RSRC2	9.04631e-11	0.356121	0.294	0.162	1.93148e-06	naive B	HTNVvsHealth
KTN1	2.71036e-12	0.353687	0.373	0.224	5.78689e-08	naive B	HTNVvsHealth
PNN	7.86793e-15	0.350479	0.465	0.272	1.67988e-10	naive B	HTNVvsHealth
DDX18	3.16747e-10	0.349233	0.326	0.194	6.76287e-06	naive B	HTNVvsHealth
COX7C	5.11338e-11	0.345889	0.873	0.728	1.09176e-06	naive B	HTNVvsHealth
ATP5J2	1.07738e-08	0.343605	0.256	0.15	0.000230032	naive B	HTNVvsHealth
NDUFA1	1.23646e-13	0.341512	0.498	0.313	2.63997e-09	naive B	HTNVvsHealth
EPC1	1.13116e-14	0.338437	0.589	0.374	2.41513e-10	naive B	HTNVvsHealth
CYTIP	4.26496e-11	0.336213	0.435	0.271	9.10611e-07	naive B	HTNVvsHealth
STK17B	1.15263e-14	0.335207	0.558	0.358	2.46097e-10	naive B	HTNVvsHealth
CREBRF	3.63859e-14	0.334841	0.26	0.117	7.76876e-10	naive B	HTNVvsHealth
FAM96A	3.27166e-06	0.333172	0.274	0.187	0.0698531	naive B	HTNVvsHealth
FUS	4.81025e-15	0.332892	0.585	0.365	1.02704e-10	naive B	HTNVvsHealth
C14orf2	1.4865e-07	0.332488	0.261	0.163	0.00317382	naive B	HTNVvsHealth
ZNF107	1.97287e-10	0.33222	0.371	0.228	4.21227e-06	naive B	HTNVvsHealth
NDUFA3	3.46203e-10	0.331947	0.36	0.225	7.39179e-06	naive B	HTNVvsHealth
ILF2	4.00218e-14	0.331267	0.365	0.194	8.54505e-10	naive B	HTNVvsHealth
SSH2	1.1282e-13	0.329377	0.441	0.257	2.40882e-09	naive B	HTNVvsHealth
INPP5D	4.08627e-13	0.325504	0.298	0.15	8.72459e-09	naive B	HTNVvsHealth
RPS10	6.06641e-12	0.32451	0.452	0.279	1.29524e-07	naive B	HTNVvsHealth
LAPTM5	2.17545e-22	0.324277	0.983	0.946	4.64481e-18	naive B	HTNVvsHealth
GCC2	1.17226e-11	0.323765	0.316	0.171	2.50289e-07	naive B	HTNVvsHealth
BZW1	2.17578e-12	0.316146	0.372	0.21	4.64551e-08	naive B	HTNVvsHealth
HSPA5	1.30267e-10	0.313036	0.319	0.179	2.78132e-06	naive B	HTNVvsHealth
HLA-A	1.99376e-23	0.310544	0.992	0.928	4.25688e-19	naive B	HTNVvsHealth
HLA-F	1.24843e-16	0.307101	0.504	0.281	2.66553e-12	naive B	HTNVvsHealth
SNRPD3	1.30337e-08	0.306028	0.262	0.157	0.000278282	naive B	HTNVvsHealth
TCF25	2.03893e-10	0.299061	0.418	0.253	4.35332e-06	naive B	HTNVvsHealth
AES	5.0251e-09	0.297839	0.388	0.249	0.000107291	naive B	HTNVvsHealth
MT-ND5	2.46679e-15	0.29756	0.667	0.361	5.26683e-11	naive B	HTNVvsHealth
TMEM123	1.19298e-10	0.295006	0.465	0.302	2.54713e-06	naive B	HTNVvsHealth
EBLN3P	8.30887e-12	0.293643	0.452	0.288	1.77403e-07	naive B	HTNVvsHealth
MAPK1IP1L	1.39934e-09	0.291033	0.33	0.2	2.98773e-05	naive B	HTNVvsHealth
ALDOA	1.45578e-10	0.289071	0.576	0.411	3.10824e-06	naive B	HTNVvsHealth
PRRC2C	3.13098e-13	0.288029	0.513	0.315	6.68496e-09	naive B	HTNVvsHealth
ERGIC1	8.16836e-11	0.287484	0.261	0.136	1.74403e-06	naive B	HTNVvsHealth
SNX9	4.40229e-12	0.28539	0.27	0.132	9.39932e-08	naive B	HTNVvsHealth
SECISBP2L	3.85719e-11	0.282744	0.318	0.175	8.2355e-07	naive B	HTNVvsHealth
PHF20	2.12516e-11	0.278988	0.346	0.195	4.53743e-07	naive B	HTNVvsHealth
PCBP2	0.00116025	0.278536	0.831	0.743	1	naive B	HTNVvsHealth
EIF1	7.22055e-11	0.277651	0.99	0.955	1.54166e-06	naive B	HTNVvsHealth
SQSTM1	1.27194e-12	0.27747	0.424	0.245	2.71573e-08	naive B	HTNVvsHealth
TAF1D	2.91383e-11	0.275118	0.484	0.313	6.22133e-07	naive B	HTNVvsHealth
NUCKS1	2.55716e-09	0.274844	0.409	0.268	5.45979e-05	naive B	HTNVvsHealth
ELOB	3.54679e-12	0.267103	0.535	0.345	7.57274e-08	naive B	HTNVvsHealth
SRRM1	4.02636e-11	0.267052	0.516	0.336	8.59668e-07	naive B	HTNVvsHealth
ANKRD12	1.30684e-08	0.264382	0.458	0.305	0.000279024	naive B	HTNVvsHealth
PIM2	1.59592e-12	0.264277	0.376	0.205	3.40745e-08	naive B	HTNVvsHealth
REL	4.39591e-12	0.263723	0.555	0.358	9.38571e-08	naive B	HTNVvsHealth
ATP6V0C	1.02507e-09	0.260286	0.596	0.414	2.18864e-05	naive B	HTNVvsHealth
POLR2L	1.60858e-07	0.259979	0.287	0.183	0.00343447	naive B	HTNVvsHealth
CD55	8.61554e-12	0.259704	0.535	0.345	1.8395e-07	naive B	HTNVvsHealth
PNPLA2	1.11358e-10	0.258972	0.379	0.222	2.37761e-06	naive B	HTNVvsHealth
MT-ND1	4.68577e-13	0.253759	0.676	0.362	1.00046e-08	naive B	HTNVvsHealth
WASF2	2.07483e-08	0.250063	0.414	0.276	0.000442996	naive B	HTNVvsHealth
CD22	0.745376	-0.250057	0.449	0.414	1	naive B	HTNVvsHealth
RACK1	3.78155e-11	-0.25038	0.992	0.998	8.07399e-07	naive B	HTNVvsHealth
PSME2	0.696877	-0.252764	0.376	0.326	1	naive B	HTNVvsHealth
EIF4A1	0.518957	-0.252882	0.337	0.322	1	naive B	HTNVvsHealth
EWSR1	0.827758	-0.254049	0.367	0.322	1	naive B	HTNVvsHealth
COPE	0.722565	-0.254741	0.339	0.302	1	naive B	HTNVvsHealth
LAMTOR5	0.78001	-0.255084	0.383	0.352	1	naive B	HTNVvsHealth
CCDC12	0.566231	-0.255568	0.26	0.253	1	naive B	HTNVvsHealth
TMEM154	0.801031	-0.255786	0.261	0.252	1	naive B	HTNVvsHealth
FTL	1.26277e-08	-0.256903	0.987	0.987	0.000269613	naive B	HTNVvsHealth
BCAP31	0.923936	-0.258843	0.3	0.28	1	naive B	HTNVvsHealth
VDAC2	0.550461	-0.25896	0.307	0.266	1	naive B	HTNVvsHealth
EIF3I	0.823049	-0.25969	0.293	0.266	1	naive B	HTNVvsHealth
PSMB6	0.993134	-0.261029	0.323	0.295	1	naive B	HTNVvsHealth
R3HDM4	0.275798	-0.261201	0.256	0.213	1	naive B	HTNVvsHealth
C1orf162	0.818681	-0.262848	0.398	0.362	1	naive B	HTNVvsHealth
EID1	0.697664	-0.2645	0.439	0.381	1	naive B	HTNVvsHealth
PHB2	0.702506	-0.264873	0.5	0.429	1	naive B	HTNVvsHealth
PSME1	0.0112407	-0.265023	0.712	0.67	1	naive B	HTNVvsHealth
SNX17	0.697243	-0.265052	0.274	0.264	1	naive B	HTNVvsHealth
SLC25A3	0.654939	-0.265071	0.517	0.464	1	naive B	HTNVvsHealth
POLR1D	0.448111	-0.266137	0.36	0.308	1	naive B	HTNVvsHealth
SNU13	0.798919	-0.266609	0.371	0.333	1	naive B	HTNVvsHealth
EIF3K	0.0827995	-0.267088	0.748	0.671	1	naive B	HTNVvsHealth
SUMO1	0.724669	-0.267952	0.27	0.259	1	naive B	HTNVvsHealth
OST4	0.257088	-0.268722	0.562	0.514	1	naive B	HTNVvsHealth
IFI16	0.926637	-0.268997	0.336	0.31	1	naive B	HTNVvsHealth
SRP9	0.503043	-0.269752	0.418	0.396	1	naive B	HTNVvsHealth
SRSF2	0.35413	-0.269813	0.379	0.362	1	naive B	HTNVvsHealth
ZCCHC7	0.46468	-0.270938	0.412	0.354	1	naive B	HTNVvsHealth
ARL5A	0.918052	-0.271722	0.259	0.242	1	naive B	HTNVvsHealth
PARVG	0.540848	-0.272659	0.257	0.253	1	naive B	HTNVvsHealth
RNASE6	0.874386	-0.273074	0.346	0.318	1	naive B	HTNVvsHealth
ERP29	0.0462751	-0.275094	0.678	0.624	1	naive B	HTNVvsHealth
NDUFB11	0.903552	-0.275947	0.489	0.442	1	naive B	HTNVvsHealth
CALR	0.379401	-0.276055	0.461	0.425	1	naive B	HTNVvsHealth
SRP14	0.00416778	-0.278151	0.774	0.741	1	naive B	HTNVvsHealth
RNASEH2B	0.569125	-0.278639	0.297	0.288	1	naive B	HTNVvsHealth
SUMO2	0.0252719	-0.280028	0.696	0.653	1	naive B	HTNVvsHealth
PKM	0.927373	-0.281446	0.306	0.283	1	naive B	HTNVvsHealth
DGUOK	0.449958	-0.283512	0.256	0.256	1	naive B	HTNVvsHealth
DBNL	0.88856	-0.284187	0.337	0.3	1	naive B	HTNVvsHealth
LAPTM4A	0.702586	-0.285856	0.259	0.25	1	naive B	HTNVvsHealth
SSR2	0.252324	-0.286185	0.569	0.517	1	naive B	HTNVvsHealth
VPS51	0.550976	-0.287716	0.285	0.275	1	naive B	HTNVvsHealth
RALY	0.976381	-0.288244	0.381	0.342	1	naive B	HTNVvsHealth
BTK	0.232464	-0.288786	0.28	0.29	1	naive B	HTNVvsHealth
NDUFB2	0.29477	-0.291931	0.3	0.304	1	naive B	HTNVvsHealth
RAC2	3.10144e-05	-0.292871	0.737	0.733	0.662189	naive B	HTNVvsHealth
HIGD2A	0.36385	-0.293791	0.467	0.431	1	naive B	HTNVvsHealth
C12orf57	0.178387	-0.293918	0.543	0.497	1	naive B	HTNVvsHealth
FAAP20	0.792885	-0.294197	0.27	0.255	1	naive B	HTNVvsHealth
EEF2	3.37039e-11	-0.294592	0.958	0.954	7.19612e-07	naive B	HTNVvsHealth
NDUFA12	0.250236	-0.294744	0.242	0.25	1	naive B	HTNVvsHealth
PLAC8	0.208713	-0.294877	0.438	0.416	1	naive B	HTNVvsHealth
FAM49B	0.354457	-0.295118	0.252	0.256	1	naive B	HTNVvsHealth
ANXA11	0.555886	-0.29596	0.33	0.317	1	naive B	HTNVvsHealth
TMEM59	0.271537	-0.296905	0.395	0.376	1	naive B	HTNVvsHealth
HLA-DOA	0.500689	-0.297227	0.259	0.257	1	naive B	HTNVvsHealth
MSN	0.458677	-0.297354	0.374	0.317	1	naive B	HTNVvsHealth
UBE2I	0.341169	-0.297902	0.418	0.4	1	naive B	HTNVvsHealth
GPSM3	0.00189233	-0.298388	0.706	0.659	1	naive B	HTNVvsHealth
HINT1	1.70671e-05	-0.299534	0.859	0.853	0.3644	naive B	HTNVvsHealth
IKZF3	0.305154	-0.300742	0.274	0.273	1	naive B	HTNVvsHealth
RAC1	0.815768	-0.301242	0.378	0.347	1	naive B	HTNVvsHealth
ST13	0.214527	-0.301374	0.483	0.454	1	naive B	HTNVvsHealth
P2RY8	0.195766	-0.301709	0.259	0.269	1	naive B	HTNVvsHealth
EEF1A1	4.32747e-22	-0.302161	1	1	9.23958e-18	naive B	HTNVvsHealth
EIF2S3	0.175571	-0.303223	0.462	0.439	1	naive B	HTNVvsHealth
CHCHD10	0.245585	-0.303233	0.428	0.407	1	naive B	HTNVvsHealth
PDIA3	0.777143	-0.304184	0.358	0.33	1	naive B	HTNVvsHealth
IMPDH2	0.481695	-0.3042	0.284	0.244	1	naive B	HTNVvsHealth
APLP2	0.429852	-0.305823	0.257	0.255	1	naive B	HTNVvsHealth
ANP32A	0.915572	-0.305907	0.382	0.345	1	naive B	HTNVvsHealth
CSNK2B	0.406538	-0.306035	0.446	0.416	1	naive B	HTNVvsHealth
KIAA0040	0.180665	-0.307421	0.245	0.258	1	naive B	HTNVvsHealth
CD99	0.915381	-0.308441	0.388	0.339	1	naive B	HTNVvsHealth
PDLIM1	0.509779	-0.309857	0.431	0.403	1	naive B	HTNVvsHealth
FKBP1A	0.633995	-0.310816	0.392	0.362	1	naive B	HTNVvsHealth
CCDC85B	0.182561	-0.31167	0.246	0.255	1	naive B	HTNVvsHealth
MOB1A	0.677093	-0.311935	0.282	0.269	1	naive B	HTNVvsHealth
EIF3F	0.00109801	-0.312152	0.779	0.732	1	naive B	HTNVvsHealth
CNN2	0.0324358	-0.313075	0.63	0.592	1	naive B	HTNVvsHealth
LSM14A	0.330829	-0.313516	0.306	0.297	1	naive B	HTNVvsHealth
COX7A2L	0.207846	-0.314924	0.307	0.311	1	naive B	HTNVvsHealth
NACA	5.26807e-17	-0.315197	0.988	0.991	1.12479e-12	naive B	HTNVvsHealth
VAMP2	0.160643	-0.315393	0.398	0.382	1	naive B	HTNVvsHealth
DAD1	0.794041	-0.315508	0.376	0.339	1	naive B	HTNVvsHealth
TNFAIP8	0.070654	-0.316794	0.404	0.407	1	naive B	HTNVvsHealth
TMEM14B	0.575531	-0.317024	0.294	0.28	1	naive B	HTNVvsHealth
NHP2	0.422998	-0.317962	0.271	0.263	1	naive B	HTNVvsHealth
ARPC3	9.04694e-07	-0.317969	0.904	0.865	0.0193161	naive B	HTNVvsHealth
CYB5A	0.313556	-0.321761	0.26	0.263	1	naive B	HTNVvsHealth
APRT	0.0872288	-0.322652	0.53	0.497	1	naive B	HTNVvsHealth
ELOVL5	0.160035	-0.323548	0.357	0.354	1	naive B	HTNVvsHealth
BACH2	0.25503	-0.32477	0.517	0.482	1	naive B	HTNVvsHealth
NONO	0.51778	-0.324816	0.303	0.288	1	naive B	HTNVvsHealth
NPM1	5.06411e-06	-0.325032	0.87	0.838	0.108124	naive B	HTNVvsHealth
BLNK	0.429936	-0.325748	0.348	0.33	1	naive B	HTNVvsHealth
CCT8	0.436541	-0.327918	0.252	0.251	1	naive B	HTNVvsHealth
PPP1CC	0.215845	-0.329753	0.393	0.373	1	naive B	HTNVvsHealth
BIN1	0.302375	-0.330557	0.28	0.279	1	naive B	HTNVvsHealth
MEAF6	0.17724	-0.331793	0.265	0.269	1	naive B	HTNVvsHealth
CHCHD2	0.00339588	-0.332721	0.706	0.658	1	naive B	HTNVvsHealth
CD37	5.01188e-23	-0.336773	0.996	1	1.07009e-18	naive B	HTNVvsHealth
PPP2R1A	0.0869387	-0.339239	0.266	0.282	1	naive B	HTNVvsHealth
ADD1	0.443997	-0.339583	0.259	0.253	1	naive B	HTNVvsHealth
HCLS1	0.146098	-0.339975	0.563	0.513	1	naive B	HTNVvsHealth
GNB2	0.47978	-0.340116	0.31	0.297	1	naive B	HTNVvsHealth
UBA52	2.83804e-14	-0.341084	0.967	0.975	6.05949e-10	naive B	HTNVvsHealth
MYL6	1.4966e-07	-0.341339	0.807	0.79	0.00319538	naive B	HTNVvsHealth
HDAC1	0.528803	-0.341791	0.274	0.267	1	naive B	HTNVvsHealth
GABARAP	0.00229861	-0.341907	0.78	0.736	1	naive B	HTNVvsHealth
ETS1	0.180913	-0.342399	0.266	0.273	1	naive B	HTNVvsHealth
BCL11A	0.824068	-0.343001	0.258	0.241	1	naive B	HTNVvsHealth
GLIPR1	0.0884432	-0.344928	0.281	0.294	1	naive B	HTNVvsHealth
FLOT2	0.458214	-0.345147	0.332	0.321	1	naive B	HTNVvsHealth
BTLA	0.0793042	-0.349522	0.251	0.272	1	naive B	HTNVvsHealth
DDX5	0.00078971	-0.353162	0.881	0.826	1	naive B	HTNVvsHealth
MAGOH	0.330373	-0.353391	0.271	0.272	1	naive B	HTNVvsHealth
CD52	1.31271e-17	-0.353524	0.987	0.99	2.80277e-13	naive B	HTNVvsHealth
CCT3	0.119785	-0.353579	0.244	0.258	1	naive B	HTNVvsHealth
PPIG	0.328748	-0.357035	0.341	0.327	1	naive B	HTNVvsHealth
CD79A	2.04604e-14	-0.357599	0.984	0.981	4.36851e-10	naive B	HTNVvsHealth
S100A4	0.0170945	-0.358564	0.25	0.185	1	naive B	HTNVvsHealth
GABARAPL2	0.0698975	-0.358768	0.36	0.366	1	naive B	HTNVvsHealth
EIF3E	0.00217011	-0.359339	0.692	0.665	1	naive B	HTNVvsHealth
TRAPPC1	0.150638	-0.359586	0.402	0.393	1	naive B	HTNVvsHealth
TGFBR2	0.464607	-0.360484	0.264	0.259	1	naive B	HTNVvsHealth
SNX29	0.539399	-0.361003	0.278	0.267	1	naive B	HTNVvsHealth
HMGN1	0.00258049	-0.362065	0.61	0.589	1	naive B	HTNVvsHealth
KRT10	0.286161	-0.362163	0.433	0.404	1	naive B	HTNVvsHealth
PTPRC	4.89497e-06	-0.362387	0.779	0.722	0.104513	naive B	HTNVvsHealth
EIF3L	0.0196363	-0.363128	0.668	0.617	1	naive B	HTNVvsHealth
TPD52	0.210438	-0.363351	0.413	0.397	1	naive B	HTNVvsHealth
SSR4	0.0942394	-0.364528	0.542	0.5	1	naive B	HTNVvsHealth
LSM2	0.046662	-0.366369	0.278	0.296	1	naive B	HTNVvsHealth
SKP1	0.00349139	-0.368168	0.619	0.585	1	naive B	HTNVvsHealth
SH3BGRL	0.0352453	-0.368374	0.5	0.482	1	naive B	HTNVvsHealth
RASGRP2	0.0752784	-0.371748	0.475	0.46	1	naive B	HTNVvsHealth
NOP53	0.000325662	-0.375121	0.832	0.802	1	naive B	HTNVvsHealth
RAN	0.00780493	-0.377092	0.517	0.513	1	naive B	HTNVvsHealth
PSMB9	0.0250548	-0.377782	0.522	0.509	1	naive B	HTNVvsHealth
MYL12A	5.32774e-07	-0.378378	0.76	0.741	0.0113753	naive B	HTNVvsHealth
CYBB	0.226134	-0.37879	0.254	0.257	1	naive B	HTNVvsHealth
ERH	0.135206	-0.384508	0.387	0.374	1	naive B	HTNVvsHealth
UBE2N	0.00688478	-0.388624	0.219	0.259	1	naive B	HTNVvsHealth
PLEKHA2	0.0643356	-0.391183	0.256	0.273	1	naive B	HTNVvsHealth
PFDN5	8.41328e-16	-0.391241	0.958	0.95	1.79632e-11	naive B	HTNVvsHealth
XRCC5	0.0651354	-0.392205	0.324	0.328	1	naive B	HTNVvsHealth
LBH	0.0135172	-0.392666	0.392	0.409	1	naive B	HTNVvsHealth
GNG5	0.0176427	-0.392891	0.358	0.37	1	naive B	HTNVvsHealth
TAPBP	0.00321134	-0.393706	0.455	0.467	1	naive B	HTNVvsHealth
STX7	0.00633307	-0.394607	0.425	0.437	1	naive B	HTNVvsHealth
SRSF5	3.45384e-06	-0.394977	0.718	0.68	0.073743	naive B	HTNVvsHealth
CCR7	0.00163949	-0.396622	0.316	0.353	1	naive B	HTNVvsHealth
MZT2B	0.0633957	-0.397092	0.268	0.283	1	naive B	HTNVvsHealth
RAP1B	0.0355687	-0.39771	0.327	0.339	1	naive B	HTNVvsHealth
CNBP	0.000158205	-0.397765	0.687	0.657	1	naive B	HTNVvsHealth
SELENOF	0.0203014	-0.398676	0.548	0.517	1	naive B	HTNVvsHealth
PDCD6	0.0322993	-0.402399	0.306	0.323	1	naive B	HTNVvsHealth
RBX1	0.046422	-0.402399	0.242	0.263	1	naive B	HTNVvsHealth
EEF1G	1.67954e-15	-0.404341	0.954	0.956	3.586e-11	naive B	HTNVvsHealth
LITAF	0.0726799	-0.406266	0.272	0.288	1	naive B	HTNVvsHealth
HLA-DOB	0.0037688	-0.406838	0.392	0.417	1	naive B	HTNVvsHealth
CXXC5	0.0488278	-0.407877	0.338	0.346	1	naive B	HTNVvsHealth
KHDRBS1	0.256187	-0.409251	0.299	0.298	1	naive B	HTNVvsHealth
YWHAB	9.14056e-06	-0.409659	0.604	0.615	0.19516	naive B	HTNVvsHealth
CCDC32	0.00542721	-0.411907	0.233	0.274	1	naive B	HTNVvsHealth
NEDD8	0.0329751	-0.412608	0.352	0.357	1	naive B	HTNVvsHealth
HLA-DMA	5.47772e-08	-0.413018	0.788	0.757	0.00116955	naive B	HTNVvsHealth
CDCA7L	0.218048	-0.413413	0.283	0.282	1	naive B	HTNVvsHealth
EIF4A2	3.71579e-05	-0.413539	0.574	0.563	0.793359	naive B	HTNVvsHealth
SELENOT	0.125483	-0.413607	0.248	0.26	1	naive B	HTNVvsHealth
RGS19	0.0467722	-0.414682	0.281	0.299	1	naive B	HTNVvsHealth
CD79B	1.72025e-10	-0.415231	0.833	0.815	3.6729e-06	naive B	HTNVvsHealth
LSP1	9.98642e-06	-0.416013	0.685	0.67	0.21322	naive B	HTNVvsHealth
ARL6IP5	0.00277409	-0.416788	0.399	0.424	1	naive B	HTNVvsHealth
EIF3D	0.0111196	-0.417069	0.414	0.424	1	naive B	HTNVvsHealth
MBD4	0.011011	-0.419602	0.288	0.318	1	naive B	HTNVvsHealth
HLA-DPA1	1.26374e-26	-0.421761	0.979	0.985	2.69822e-22	naive B	HTNVvsHealth
EEF1B2	5.09012e-18	-0.422194	0.978	0.987	1.08679e-13	naive B	HTNVvsHealth
HLA-DQB1	5.68708e-16	-0.422916	0.917	0.869	1.21425e-11	naive B	HTNVvsHealth
OSTF1	0.0968959	-0.424459	0.327	0.329	1	naive B	HTNVvsHealth
PAX5	0.038768	-0.42462	0.249	0.274	1	naive B	HTNVvsHealth
HNRNPU	0.00898914	-0.424925	0.425	0.436	1	naive B	HTNVvsHealth
BANK1	1.68182e-05	-0.425382	0.746	0.703	0.359085	naive B	HTNVvsHealth
PSMB8	0.00213885	-0.425617	0.398	0.424	1	naive B	HTNVvsHealth
COX4I1	3.79152e-19	-0.425623	0.91	0.931	8.09528e-15	naive B	HTNVvsHealth
IL2RG	0.000142888	-0.426792	0.606	0.601	1	naive B	HTNVvsHealth
SYNGR2	4.50085e-06	-0.429009	0.668	0.663	0.0960975	naive B	HTNVvsHealth
CAPZB	0.0458329	-0.431367	0.401	0.401	1	naive B	HTNVvsHealth
CD24	0.0394432	-0.432763	0.267	0.287	1	naive B	HTNVvsHealth
REEP5	0.00941367	-0.43423	0.273	0.305	1	naive B	HTNVvsHealth
PPP1CA	0.00139802	-0.43558	0.522	0.516	1	naive B	HTNVvsHealth
FBL	0.03108	-0.435963	0.324	0.339	1	naive B	HTNVvsHealth
IKZF1	0.00538644	-0.436484	0.332	0.364	1	naive B	HTNVvsHealth
PPP1R18	0.000194806	-0.436677	0.195	0.255	1	naive B	HTNVvsHealth
APBB1IP	0.00396173	-0.440008	0.237	0.274	1	naive B	HTNVvsHealth
SOD1	0.00877133	-0.440123	0.393	0.399	1	naive B	HTNVvsHealth
RNASEK	8.99069e-06	-0.441927	0.609	0.615	0.19196	naive B	HTNVvsHealth
SRSF9	0.00427223	-0.442143	0.232	0.273	1	naive B	HTNVvsHealth
PNRC1	5.91214e-07	-0.442543	0.753	0.745	0.012623	naive B	HTNVvsHealth
BST2	0.29034	-0.443223	0.252	0.251	1	naive B	HTNVvsHealth
ITGA4	0.0069925	-0.444633	0.307	0.335	1	naive B	HTNVvsHealth
BLOC1S2	0.0420271	-0.444644	0.382	0.382	1	naive B	HTNVvsHealth
SNX2	2.20161e-06	-0.450536	0.61	0.612	0.0470066	naive B	HTNVvsHealth
LCP1	0.0282876	-0.45105	0.396	0.405	1	naive B	HTNVvsHealth
IGHV5-78	0.00170775	-0.451108	0.226	0.274	1	naive B	HTNVvsHealth
NDUFA13	0.00525347	-0.454145	0.342	0.364	1	naive B	HTNVvsHealth
MYL12B	0.00282948	-0.454589	0.51	0.51	1	naive B	HTNVvsHealth
EAF2	0.00754495	-0.455827	0.383	0.403	1	naive B	HTNVvsHealth
FXYD5	5.23965e-14	-0.455984	0.823	0.815	1.11872e-09	naive B	HTNVvsHealth
TRBC2	3.96111e-05	-0.456812	0.414	0.456	0.845736	naive B	HTNVvsHealth
PTGES3	0.00343277	-0.461655	0.398	0.416	1	naive B	HTNVvsHealth
LDHB	0.0892565	-0.462159	0.353	0.347	1	naive B	HTNVvsHealth
CAP1	0.0014304	-0.463164	0.382	0.409	1	naive B	HTNVvsHealth
LINC00926	7.03306e-09	-0.463999	0.77	0.756	0.000150163	naive B	HTNVvsHealth
ARF6	0.0147573	-0.464569	0.349	0.364	1	naive B	HTNVvsHealth
PLPP5	3.9206e-08	-0.466309	0.619	0.633	0.000837087	naive B	HTNVvsHealth
CLIC1	4.15597e-08	-0.467543	0.633	0.653	0.00088734	naive B	HTNVvsHealth
ARPC5	0.00239873	-0.46789	0.298	0.338	1	naive B	HTNVvsHealth
SH3BP5	0.000545895	-0.469489	0.363	0.403	1	naive B	HTNVvsHealth
PRDX1	0.00444029	-0.471057	0.246	0.282	1	naive B	HTNVvsHealth
CYBA	3.7963e-15	-0.477808	0.845	0.83	8.10547e-11	naive B	HTNVvsHealth
EDF1	7.40897e-05	-0.477995	0.602	0.584	1	naive B	HTNVvsHealth
YBX1	1.49475e-07	-0.478644	0.746	0.732	0.00319144	naive B	HTNVvsHealth
ARPC1B	4.9214e-07	-0.480774	0.534	0.568	0.0105077	naive B	HTNVvsHealth
SELENOH	0.000200059	-0.481942	0.588	0.565	1	naive B	HTNVvsHealth
FCER2	8.89825e-12	-0.485272	0.678	0.698	1.89987e-07	naive B	HTNVvsHealth
SMIM14	0.000355217	-0.489546	0.274	0.333	1	naive B	HTNVvsHealth
SYPL1	3.10345e-05	-0.490308	0.424	0.46	0.662617	naive B	HTNVvsHealth
SNX3	1.56935e-05	-0.490494	0.667	0.633	0.335073	naive B	HTNVvsHealth
EVI2B	6.84192e-05	-0.495819	0.51	0.518	1	naive B	HTNVvsHealth
TRMT112	0.000520817	-0.497708	0.421	0.443	1	naive B	HTNVvsHealth
PDCD4	0.00047573	-0.498172	0.312	0.352	1	naive B	HTNVvsHealth
BANF1	2.98094e-05	-0.500205	0.205	0.274	0.63646	naive B	HTNVvsHealth
DCK	0.000288891	-0.50416	0.271	0.323	1	naive B	HTNVvsHealth
CALHM6	0.000106983	-0.504998	0.519	0.533	1	naive B	HTNVvsHealth
TUBB	0.00113757	-0.505649	0.302	0.338	1	naive B	HTNVvsHealth
ALOX5AP	9.53488e-05	-0.505921	0.269	0.325	1	naive B	HTNVvsHealth
LINC02397	1.38943e-05	-0.51139	0.272	0.339	0.296657	naive B	HTNVvsHealth
SNHG6	5.29928e-05	-0.516933	0.219	0.281	1	naive B	HTNVvsHealth
C9orf16	0.000506074	-0.517049	0.334	0.369	1	naive B	HTNVvsHealth
CD164	0.000731647	-0.520804	0.257	0.307	1	naive B	HTNVvsHealth
PLEKHF2	2.48016e-05	-0.522635	0.298	0.364	0.529538	naive B	HTNVvsHealth
CFL1	5.22499e-15	-0.522637	0.857	0.854	1.11559e-10	naive B	HTNVvsHealth
GDI2	3.78018e-06	-0.530891	0.491	0.522	0.0807107	naive B	HTNVvsHealth
NDUFA11	0.000280331	-0.530893	0.228	0.279	1	naive B	HTNVvsHealth
C1QBP	0.00318743	-0.532977	0.286	0.312	1	naive B	HTNVvsHealth
QRSL1	0.00021214	-0.536643	0.225	0.281	1	naive B	HTNVvsHealth
RBBP4	0.00590245	-0.537005	0.254	0.282	1	naive B	HTNVvsHealth
ATP6V0E1	5.65119e-06	-0.548568	0.43	0.478	0.120659	naive B	HTNVvsHealth
PYURF	0.000217024	-0.548891	0.204	0.256	1	naive B	HTNVvsHealth
ATP5F1D	1.63718e-05	-0.549332	0.231	0.296	0.349554	naive B	HTNVvsHealth
BLOC1S1	9.26421e-05	-0.550373	0.246	0.305	1	naive B	HTNVvsHealth
TMBIM4	0.012168	-0.550593	0.281	0.302	1	naive B	HTNVvsHealth
OAZ1	4.13144e-26	-0.55206	0.885	0.909	8.82103e-22	naive B	HTNVvsHealth
ZNF706	0.000673257	-0.552538	0.296	0.335	1	naive B	HTNVvsHealth
CD82	4.39134e-06	-0.552634	0.195	0.267	0.0937595	naive B	HTNVvsHealth
ATP6V1G1	4.4616e-12	-0.552944	0.722	0.75	9.52596e-08	naive B	HTNVvsHealth
CYB561A3	3.38954e-06	-0.554467	0.378	0.439	0.0723701	naive B	HTNVvsHealth
MEF2C	9.65237e-09	-0.554924	0.597	0.602	0.000206088	naive B	HTNVvsHealth
IMP3	2.45718e-05	-0.555181	0.23	0.292	0.524633	naive B	HTNVvsHealth
ARHGDIB	5.8988e-27	-0.555281	0.885	0.898	1.25945e-22	naive B	HTNVvsHealth
ARPC2	3.12887e-13	-0.55618	0.69	0.719	6.68046e-09	naive B	HTNVvsHealth
ATP5MG	5.424e-10	-0.557607	0.27	0.394	1.15808e-05	naive B	HTNVvsHealth
TRIR	2.74032e-06	-0.557702	0.504	0.532	0.0585086	naive B	HTNVvsHealth
POLD4	5.22278e-11	-0.561703	0.648	0.686	1.11511e-06	naive B	HTNVvsHealth
TRAF3IP3	7.60557e-07	-0.565581	0.432	0.484	0.0162387	naive B	HTNVvsHealth
NCF1	2.54665e-22	-0.57074	0.799	0.81	5.43735e-18	naive B	HTNVvsHealth
H3F3A	1.60541e-29	-0.574956	0.892	0.916	3.4277e-25	naive B	HTNVvsHealth
PSMB8-AS1	2.72632e-05	-0.576857	0.265	0.327	0.582097	naive B	HTNVvsHealth
HLA-DRA	3.84736e-61	-0.579791	0.997	1	8.21451e-57	naive B	HTNVvsHealth
SEPTIN7	2.3432e-05	-0.581884	0.192	0.25	0.500296	naive B	HTNVvsHealth
ANXA6	6.88039e-06	-0.584319	0.438	0.471	0.146903	naive B	HTNVvsHealth
ARHGAP17	7.68649e-05	-0.589091	0.196	0.255	1	naive B	HTNVvsHealth
FCRLA	3.4186e-07	-0.590185	0.459	0.507	0.00729906	naive B	HTNVvsHealth
SPI1	4.4025e-05	-0.59472	0.229	0.289	0.939978	naive B	HTNVvsHealth
KLF2	1.20346e-13	-0.595142	0.704	0.726	2.56951e-09	naive B	HTNVvsHealth
HHEX	5.79823e-05	-0.595636	0.247	0.305	1	naive B	HTNVvsHealth
HLA-DMB	1.08629e-11	-0.598139	0.523	0.584	2.31935e-07	naive B	HTNVvsHealth
ICAM3	1.13623e-05	-0.598226	0.339	0.388	0.242597	naive B	HTNVvsHealth
MS4A1	2.57565e-33	-0.599525	0.924	0.913	5.49927e-29	naive B	HTNVvsHealth
PPDPF	1.17893e-14	-0.601122	0.689	0.74	2.51714e-10	naive B	HTNVvsHealth
FCMR	2.05829e-20	-0.606489	0.759	0.772	4.39464e-16	naive B	HTNVvsHealth
CSK	7.93644e-09	-0.607577	0.386	0.471	0.000169451	naive B	HTNVvsHealth
CAPZA1	8.86846e-05	-0.608392	0.272	0.325	1	naive B	HTNVvsHealth
MAT2B	5.12843e-07	-0.611821	0.306	0.381	0.0109497	naive B	HTNVvsHealth
LSM10	6.55311e-06	-0.617489	0.255	0.319	0.139915	naive B	HTNVvsHealth
CD40	3.74599e-07	-0.621217	0.349	0.414	0.00799807	naive B	HTNVvsHealth
HNRNPF	2.33047e-07	-0.626845	0.306	0.385	0.00497579	naive B	HTNVvsHealth
CD74	6.49351e-93	-0.62859	1	1	1.38643e-88	naive B	HTNVvsHealth
TSPAN13	2.95048e-08	-0.632668	0.374	0.45	0.000629956	naive B	HTNVvsHealth
PTPN6	3.04688e-14	-0.643147	0.519	0.604	6.5054e-10	naive B	HTNVvsHealth
SELL	2.05418e-20	-0.660382	0.636	0.713	4.38588e-16	naive B	HTNVvsHealth
ATP5MC2	4.07696e-17	-0.666379	0.299	0.485	8.70472e-13	naive B	HTNVvsHealth
BRK1	6.0973e-11	-0.666817	0.398	0.483	1.30184e-06	naive B	HTNVvsHealth
ACTR3	1.73591e-10	-0.668305	0.389	0.474	3.70634e-06	naive B	HTNVvsHealth
PPIA	4.82466e-35	-0.670013	0.932	0.956	1.03011e-30	naive B	HTNVvsHealth
CALM2	1.41381e-13	-0.688863	0.463	0.552	3.01862e-09	naive B	HTNVvsHealth
UCP2	1.58757e-21	-0.689136	0.669	0.742	3.38963e-17	naive B	HTNVvsHealth
ADK	2.00969e-07	-0.689913	0.352	0.414	0.00429089	naive B	HTNVvsHealth
ZFP36L1	9.45379e-21	-0.691476	0.69	0.761	2.01848e-16	naive B	HTNVvsHealth
TPT1	1.23744e-66	-0.693938	0.996	0.998	2.64205e-62	naive B	HTNVvsHealth
PFN1	1.02276e-37	-0.69949	0.91	0.935	2.1837e-33	naive B	HTNVvsHealth
TOMM6	7.95191e-09	-0.712588	0.17	0.259	0.000169781	naive B	HTNVvsHealth
LTA4H	8.39047e-06	-0.712875	0.338	0.389	0.179145	naive B	HTNVvsHealth
STK17A	1.53725e-11	-0.715235	0.389	0.481	3.28219e-07	naive B	HTNVvsHealth
CORO1A	1.00667e-31	-0.725977	0.767	0.823	2.14935e-27	naive B	HTNVvsHealth
IL4R	1.79988e-13	-0.727277	0.483	0.569	3.84292e-09	naive B	HTNVvsHealth
SH3BGRL3	3.07207e-28	-0.727898	0.825	0.859	6.55917e-24	naive B	HTNVvsHealth
HSPA8	2.81887e-16	-0.748948	0.514	0.603	6.01857e-12	naive B	HTNVvsHealth
NDUFB8	3.73164e-09	-0.76363	0.164	0.253	7.96743e-05	naive B	HTNVvsHealth
PARP1	3.37802e-11	-0.765985	0.327	0.424	7.21241e-07	naive B	HTNVvsHealth
SEPTIN6	1.43358e-09	-0.790451	0.163	0.253	3.06083e-05	naive B	HTNVvsHealth
ZFAS1	6.10267e-13	-0.81212	0.229	0.351	1.30298e-08	naive B	HTNVvsHealth
LIMD2	4.25876e-53	-0.824251	0.822	0.89	9.09288e-49	naive B	HTNVvsHealth
IGLV2-14	1.9671e-23	-0.853209	0.266	0.073	4.19996e-19	naive B	HTNVvsHealth
HLA-DPB1	3.53175e-97	-0.884414	0.966	0.987	7.54063e-93	naive B	HTNVvsHealth
SPIB	7.34227e-13	-0.891408	0.314	0.429	1.56765e-08	naive B	HTNVvsHealth
SNHG29	4.35962e-21	-0.909387	0.292	0.484	9.30823e-17	naive B	HTNVvsHealth
GAS5	1.11772e-20	-0.919894	0.248	0.428	2.38644e-16	naive B	HTNVvsHealth
ATP5PO	2.86475e-18	-0.937782	0.199	0.346	6.11652e-14	naive B	HTNVvsHealth
MARCKSL1	1.79255e-17	-0.965927	0.206	0.35	3.82727e-13	naive B	HTNVvsHealth
TMSB4X	6.43428e-133	-1.01065	0.991	0.999	1.37378e-128	naive B	HTNVvsHealth
TLE5	2.71183e-13	-1.0253	0.172	0.286	5.79004e-09	naive B	HTNVvsHealth
ACTB	7.8732e-114	-1.09495	0.985	0.998	1.68101e-109	naive B	HTNVvsHealth
HVCN1	8.37604e-44	-1.10052	0.534	0.692	1.78837e-39	naive B	HTNVvsHealth
TCL1A	1.26936e-72	-1.11581	0.792	0.905	2.71021e-68	naive B	HTNVvsHealth
NIBAN3	2.89567e-26	-1.15906	0.224	0.415	6.18254e-22	naive B	HTNVvsHealth
HLA-DRB5	1.63616e-69	-1.2242	0.709	0.919	3.49336e-65	naive B	HTNVvsHealth
HLA-DQA2	8.81028e-16	-1.23865	0.208	0.33	1.88108e-11	naive B	HTNVvsHealth
LTB	8.16094e-100	-1.26317	0.819	0.935	1.74244e-95	naive B	HTNVvsHealth
ACTG1	2.49156e-65	-1.29668	0.63	0.803	5.31973e-61	naive B	HTNVvsHealth
SNHG7	2.17824e-34	-1.63701	0.076	0.266	4.65076e-30	naive B	HTNVvsHealth
2025-06-01	1.23887e-39	2.03097	0.637	0.249	2.64512e-35	DN B	HTNVvsHealth
CD691	3.02142e-58	1.91469	0.644	0.14	6.45104e-54	DN B	HTNVvsHealth
TSC22D31	1.74143e-75	1.66874	0.988	0.814	3.71812e-71	DN B	HTNVvsHealth
DUSP11	5.15774e-48	1.64607	0.81	0.373	1.10123e-43	DN B	HTNVvsHealth
KLF61	2.96999e-51	1.62976	0.897	0.541	6.34123e-47	DN B	HTNVvsHealth
PPP1R15A1	7.27893e-45	1.58629	0.686	0.258	1.55412e-40	DN B	HTNVvsHealth
CD831	1.0262e-32	1.28541	0.403	0.081	2.19103e-28	DN B	HTNVvsHealth
RPLP01	3.86736e-19	1.22338	0.487	0.234	8.25721e-15	DN B	HTNVvsHealth
RPL141	9.18868e-20	1.19673	0.489	0.234	1.96187e-15	DN B	HTNVvsHealth
RPL281	1.40547e-19	1.18744	0.489	0.234	3.00081e-15	DN B	HTNVvsHealth
RPS31	2.44882e-18	1.1538	0.489	0.234	5.22848e-14	DN B	HTNVvsHealth
RPL101	7.75152e-18	1.13426	0.489	0.234	1.65503e-13	DN B	HTNVvsHealth
RPL7A1	1.92384e-18	1.13287	0.487	0.234	4.1076e-14	DN B	HTNVvsHealth
RPL361	4.22238e-18	1.12455	0.489	0.234	9.01519e-14	DN B	HTNVvsHealth
TXNIP1	7.30497e-43	1.10714	0.979	0.961	1.55968e-38	DN B	HTNVvsHealth
RPS251	1.25351e-17	1.09369	0.487	0.234	2.67636e-13	DN B	HTNVvsHealth
RPL181	3.28269e-17	1.07894	0.487	0.234	7.00888e-13	DN B	HTNVvsHealth
RHOB	9.13347e-21	1.05925	0.349	0.103	1.95009e-16	DN B	HTNVvsHealth
RPS241	1.799e-16	1.05412	0.485	0.234	3.84105e-12	DN B	HTNVvsHealth
RPS191	2.87843e-16	1.05393	0.485	0.234	6.14573e-12	DN B	HTNVvsHealth
RPS15A1	1.02112e-15	1.02313	0.489	0.234	2.1802e-11	DN B	HTNVvsHealth
RPL13A1	2.03429e-16	1.01954	0.485	0.234	4.34341e-12	DN B	HTNVvsHealth
RPS151	5.2702e-16	1.01881	0.487	0.234	1.12524e-11	DN B	HTNVvsHealth
RPL301	2.24699e-15	1.0134	0.487	0.234	4.79756e-11	DN B	HTNVvsHealth
RPL111	4.62051e-15	1.01087	0.487	0.234	9.86525e-11	DN B	HTNVvsHealth
RPSA1	3.45751e-16	0.999586	0.487	0.234	7.38213e-12	DN B	HTNVvsHealth
RPL27A1	3.56242e-15	0.997782	0.454	0.225	7.60612e-11	DN B	HTNVvsHealth
RPS141	4.24085e-15	0.992289	0.487	0.234	9.05464e-11	DN B	HTNVvsHealth
UBC1	4.35054e-34	0.992206	0.981	0.891	9.28884e-30	DN B	HTNVvsHealth
NFKBIA1	4.22648e-15	0.989993	0.82	0.574	9.02395e-11	DN B	HTNVvsHealth
RPS121	1.85533e-15	0.989699	0.489	0.234	3.96131e-11	DN B	HTNVvsHealth
RPL36AL1	1.95859e-17	0.988872	0.445	0.21	4.18179e-13	DN B	HTNVvsHealth
RPL51	4.55503e-16	0.985315	0.487	0.234	9.72545e-12	DN B	HTNVvsHealth
RPL33	3.2911e-15	0.982411	0.487	0.234	7.02683e-11	DN B	HTNVvsHealth
RPS111	2.33145e-16	0.978233	0.478	0.234	4.97788e-12	DN B	HTNVvsHealth
RPL23A1	3.9166e-15	0.970294	0.485	0.234	8.36233e-11	DN B	HTNVvsHealth
RPS161	2.61788e-15	0.965904	0.485	0.234	5.58943e-11	DN B	HTNVvsHealth
GADD45B1	5.63987e-19	0.961915	0.384	0.137	1.20417e-14	DN B	HTNVvsHealth
RPS71	1.96438e-15	0.961277	0.489	0.234	4.19415e-11	DN B	HTNVvsHealth
RPS4Y11	2.20833e-19	0.954209	0.459	0.188	4.715e-15	DN B	HTNVvsHealth
RPS131	1.16389e-14	0.947564	0.487	0.234	2.48503e-10	DN B	HTNVvsHealth
RPL241	2.73351e-16	0.94754	0.482	0.234	5.83632e-12	DN B	HTNVvsHealth
RPLP11	2.58505e-14	0.943273	0.489	0.234	5.51934e-10	DN B	HTNVvsHealth
RPL291	1.62835e-14	0.941501	0.487	0.234	3.47669e-10	DN B	HTNVvsHealth
RPS231	2.63361e-14	0.940342	0.487	0.234	5.62301e-10	DN B	HTNVvsHealth
RPL191	1.91075e-14	0.936823	0.489	0.234	4.07964e-10	DN B	HTNVvsHealth
PELI11	5.71275e-25	0.930711	0.511	0.179	1.21973e-20	DN B	HTNVvsHealth
RPS3A1	2.06745e-14	0.924684	0.487	0.234	4.41421e-10	DN B	HTNVvsHealth
RPL71	1.83508e-16	0.919517	0.48	0.232	3.91807e-12	DN B	HTNVvsHealth
RPS281	1.07925e-13	0.917727	0.487	0.234	2.3043e-09	DN B	HTNVvsHealth
RPL311	1.08668e-15	0.916851	0.471	0.229	2.32018e-11	DN B	HTNVvsHealth
IGHM	4.32538e-12	0.915514	0.454	0.231	9.23512e-08	DN B	HTNVvsHealth
RPS27A1	1.92391e-13	0.907418	0.487	0.234	4.10774e-09	DN B	HTNVvsHealth
PMAIP11	4.81297e-26	0.90699	0.436	0.124	1.02762e-21	DN B	HTNVvsHealth
RPL261	2.08845e-14	0.903515	0.489	0.234	4.45905e-10	DN B	HTNVvsHealth
RPS81	1.81083e-13	0.894312	0.489	0.234	3.86631e-09	DN B	HTNVvsHealth
RPS22	3.01142e-14	0.891754	0.489	0.234	6.42968e-10	DN B	HTNVvsHealth
RPS4X1	4.72021e-14	0.888079	0.489	0.234	1.00781e-09	DN B	HTNVvsHealth
MT-CO21	9.06515e-13	0.877897	0.489	0.234	1.9355e-08	DN B	HTNVvsHealth
RPL18A1	1.22412e-12	0.871524	0.489	0.234	2.61361e-08	DN B	HTNVvsHealth
RPL321	1.21104e-12	0.868704	0.487	0.234	2.58569e-08	DN B	HTNVvsHealth
RPL35A1	5.09371e-13	0.85796	0.487	0.234	1.08756e-08	DN B	HTNVvsHealth
CXCR41	3.19094e-29	0.847912	0.885	0.542	6.81297e-25	DN B	HTNVvsHealth
RPS181	3.53962e-13	0.84665	0.489	0.234	7.55745e-09	DN B	HTNVvsHealth
ATP5E1	2.88934e-13	0.842457	0.454	0.232	6.16902e-09	DN B	HTNVvsHealth
RPS51	3.72631e-13	0.839914	0.487	0.234	7.95604e-09	DN B	HTNVvsHealth
HIST1H4C1	7.30672e-22	0.837053	0.621	0.292	1.56006e-17	DN B	HTNVvsHealth
RPL151	1.43751e-13	0.835338	0.485	0.234	3.06923e-09	DN B	HTNVvsHealth
ATP5G21	5.20995e-15	0.82925	0.452	0.22	1.11238e-10	DN B	HTNVvsHealth
RPL121	5.10905e-13	0.817617	0.487	0.234	1.09083e-08	DN B	HTNVvsHealth
RPL391	1.04699e-11	0.811599	0.489	0.234	2.23542e-07	DN B	HTNVvsHealth
RPL171	7.18594e-13	0.806262	0.487	0.232	1.53427e-08	DN B	HTNVvsHealth
RPL341	1.03518e-11	0.80591	0.489	0.234	2.21021e-07	DN B	HTNVvsHealth
RPL131	8.20773e-12	0.799006	0.489	0.234	1.75243e-07	DN B	HTNVvsHealth
RPS271	1.17393e-11	0.79379	0.487	0.234	2.50646e-07	DN B	HTNVvsHealth
RPL81	4.7421e-12	0.781075	0.487	0.234	1.01249e-07	DN B	HTNVvsHealth
ATP5L1	6.25422e-15	0.775812	0.433	0.205	1.33534e-10	DN B	HTNVvsHealth
RPS61	5.61961e-12	0.773106	0.487	0.234	1.19984e-07	DN B	HTNVvsHealth
RPS171	1.42654e-15	0.772527	0.433	0.201	3.04581e-11	DN B	HTNVvsHealth
RPL37A1	4.57262e-12	0.761914	0.482	0.234	9.76299e-08	DN B	HTNVvsHealth
HERPUD11	2.04994e-10	0.74799	0.707	0.498	4.37682e-06	DN B	HTNVvsHealth
RPL10A1	5.09335e-12	0.745813	0.475	0.234	1.08748e-07	DN B	HTNVvsHealth
RPL351	1.53945e-12	0.742935	0.48	0.234	3.28688e-08	DN B	HTNVvsHealth
RPS211	1.53998e-11	0.739613	0.489	0.234	3.28802e-07	DN B	HTNVvsHealth
RPS91	3.21432e-12	0.73226	0.485	0.234	6.86289e-08	DN B	HTNVvsHealth
RPL371	8.1054e-11	0.727949	0.487	0.234	1.73058e-06	DN B	HTNVvsHealth
RPLP21	8.34955e-11	0.72441	0.489	0.234	1.78271e-06	DN B	HTNVvsHealth
RPL91	8.31141e-12	0.724392	0.482	0.234	1.77457e-07	DN B	HTNVvsHealth
RPL61	7.03585e-12	0.722693	0.489	0.234	1.50222e-07	DN B	HTNVvsHealth
RPL271	8.87905e-13	0.709118	0.485	0.231	1.89577e-08	DN B	HTNVvsHealth
TUBA1A1	2.0798e-18	0.704615	0.614	0.304	4.44058e-14	DN B	HTNVvsHealth
MT-ND4L1	3.14439e-11	0.702555	0.487	0.234	6.71358e-07	DN B	HTNVvsHealth
STAG31	1.91976e-15	0.697147	0.283	0.083	4.09887e-11	DN B	HTNVvsHealth
SBDS1	2.0094e-22	0.695142	0.464	0.157	4.29027e-18	DN B	HTNVvsHealth
JUNB1	1.71866e-15	0.686248	0.803	0.535	3.66951e-11	DN B	HTNVvsHealth
RPL231	4.02633e-13	0.671914	0.419	0.207	8.59662e-09	DN B	HTNVvsHealth
TRA2B1	1.47487e-19	0.670098	0.625	0.31	3.14899e-15	DN B	HTNVvsHealth
RPL221	5.63578e-12	0.669701	0.487	0.234	1.20329e-07	DN B	HTNVvsHealth
CFLAR1	3.70706e-20	0.669664	0.571	0.253	7.91494e-16	DN B	HTNVvsHealth
RPL41	1.11488e-11	0.661407	0.473	0.234	2.38038e-07	DN B	HTNVvsHealth
ATP5G31	1.37282e-13	0.644268	0.307	0.118	2.9311e-09	DN B	HTNVvsHealth
NFKBID	1.22968e-08	0.640037	0.251	0.111	0.000262548	DN B	HTNVvsHealth
ATP5D1	1.11377e-12	0.638353	0.337	0.149	2.37801e-08	DN B	HTNVvsHealth
RPL381	2.55647e-11	0.63699	0.468	0.234	5.45832e-07	DN B	HTNVvsHealth
KIAA1551	2.51819e-12	0.626334	0.29	0.116	5.37658e-08	DN B	HTNVvsHealth
1961-09-01	2.10694e-11	0.615013	0.33	0.153	4.49852e-07	DN B	HTNVvsHealth
CCDC6	2.76747e-19	0.614504	0.281	0.063	5.90882e-15	DN B	HTNVvsHealth
ZFP361	5.18174e-12	0.609524	0.824	0.596	1.10635e-07	DN B	HTNVvsHealth
SAT11	1.0916e-14	0.608998	0.768	0.474	2.33067e-10	DN B	HTNVvsHealth
ROMO1	1.59552e-20	0.599573	0.506	0.197	3.4066e-16	DN B	HTNVvsHealth
RHOH	8.35872e-18	0.575993	0.541	0.247	1.78467e-13	DN B	HTNVvsHealth
SLC2A31	3.04961e-15	0.572124	0.344	0.125	6.51121e-11	DN B	HTNVvsHealth
RPL22L11	2.94714e-10	0.56933	0.3	0.137	6.29244e-06	DN B	HTNVvsHealth
MT-CYB1	2.86627e-10	0.561306	0.487	0.234	6.11978e-06	DN B	HTNVvsHealth
USMG5	3.28559e-09	0.558077	0.29	0.138	7.01507e-05	DN B	HTNVvsHealth
JUND1	8.62805e-17	0.558025	0.363	0.125	1.84217e-12	DN B	HTNVvsHealth
MAP3K81	7.82733e-13	0.557615	0.377	0.157	1.67121e-08	DN B	HTNVvsHealth
RNF19A	4.29285e-14	0.555884	0.314	0.113	9.16567e-10	DN B	HTNVvsHealth
NDUFA31	1.38776e-16	0.545549	0.543	0.256	2.963e-12	DN B	HTNVvsHealth
MT-CO31	1.55655e-09	0.541767	0.487	0.234	3.32339e-05	DN B	HTNVvsHealth
SNX91	9.20853e-15	0.54083	0.269	0.079	1.96611e-10	DN B	HTNVvsHealth
SEC62	5.26423e-13	0.53878	0.674	0.406	1.12397e-08	DN B	HTNVvsHealth
RPS201	7.71269e-10	0.535247	0.431	0.227	1.64674e-05	DN B	HTNVvsHealth
DDX211	9.1052e-12	0.528467	0.431	0.212	1.94405e-07	DN B	HTNVvsHealth
PTPN11	3.06006e-14	0.527372	0.564	0.293	6.53352e-10	DN B	HTNVvsHealth
ATPIF11	1.29035e-11	0.509974	0.319	0.137	2.75502e-07	DN B	HTNVvsHealth
1971-09-01	2.39048e-11	0.503138	0.349	0.161	5.10392e-07	DN B	HTNVvsHealth
THEMIS2	7.75928e-15	0.49929	0.311	0.101	1.65668e-10	DN B	HTNVvsHealth
GABPB11	6.15631e-12	0.486993	0.272	0.1	1.31443e-07	DN B	HTNVvsHealth
DDIT3	8.2674e-14	0.481548	0.253	0.072	1.76517e-09	DN B	HTNVvsHealth
SRSF101	2.14794e-14	0.479677	0.642	0.354	4.58607e-10	DN B	HTNVvsHealth
PET1001	3.14666e-12	0.47713	0.48	0.247	6.71844e-08	DN B	HTNVvsHealth
PCBP21	3.78884e-10	0.475833	0.939	0.742	8.08956e-06	DN B	HTNVvsHealth
SEC61G	5.97984e-15	0.475715	0.55	0.275	1.27676e-10	DN B	HTNVvsHealth
HSPA51	6.18865e-10	0.474472	0.445	0.242	1.32134e-05	DN B	HTNVvsHealth
SON1	1.99892e-11	0.473659	0.768	0.506	4.2679e-07	DN B	HTNVvsHealth
MZB11	1.36749e-12	0.467878	0.368	0.157	2.91973e-08	DN B	HTNVvsHealth
IRF11	3.26356e-05	0.460457	0.499	0.347	0.696803	DN B	HTNVvsHealth
HSP90B1	3.65272e-09	0.46026	0.667	0.423	7.79892e-05	DN B	HTNVvsHealth
COX7C1	2.39342e-14	0.45897	0.953	0.782	5.11019e-10	DN B	HTNVvsHealth
IGKC1	0.000233369	0.458111	0.569	0.424	1	DN B	HTNVvsHealth
GPR183	2.93613e-10	0.456819	0.555	0.328	6.26893e-06	DN B	HTNVvsHealth
SP100	4.88698e-14	0.454695	0.778	0.493	1.04342e-09	DN B	HTNVvsHealth
LY9	9.38895e-12	0.454585	0.344	0.146	2.00463e-07	DN B	HTNVvsHealth
ATP5H	7.77507e-13	0.452653	0.26	0.089	1.66006e-08	DN B	HTNVvsHealth
PRDM2	2.34306e-14	0.450241	0.391	0.159	5.00267e-10	DN B	HTNVvsHealth
ATP5B1	5.06961e-08	0.449441	0.297	0.155	0.00108241	DN B	HTNVvsHealth
PTPRCAP1	1.13577e-14	0.447499	0.937	0.723	2.42498e-10	DN B	HTNVvsHealth
MYC	9.45169e-08	0.443759	0.365	0.194	0.00201803	DN B	HTNVvsHealth
KLF10	1.46339e-07	0.443683	0.255	0.122	0.00312449	DN B	HTNVvsHealth
GLO11	4.9069e-13	0.443445	0.412	0.177	1.04767e-08	DN B	HTNVvsHealth
CCND31	4.08263e-11	0.439641	0.686	0.423	8.71682e-07	DN B	HTNVvsHealth
ATP5J	1.43475e-09	0.430932	0.26	0.113	3.06334e-05	DN B	HTNVvsHealth
RPL211	8.22421e-09	0.429448	0.48	0.234	0.000175595	DN B	HTNVvsHealth
H3F3B	5.55242e-11	0.427344	0.986	0.923	1.1855e-06	DN B	HTNVvsHealth
TCIRG1	3.95203e-10	0.42101	0.372	0.179	8.43797e-06	DN B	HTNVvsHealth
EML4	4.23011e-10	0.42093	0.529	0.297	9.0317e-06	DN B	HTNVvsHealth
RPS291	1.66959e-08	0.420366	0.48	0.234	0.000356475	DN B	HTNVvsHealth
G3BP21	1.90641e-11	0.420361	0.459	0.229	4.07037e-07	DN B	HTNVvsHealth
MT-CO1	1.7132e-08	0.418681	0.482	0.234	0.000365785	DN B	HTNVvsHealth
FOXP1	1.99584e-09	0.413661	0.646	0.406	4.26131e-05	DN B	HTNVvsHealth
ATP5J21	3.21857e-09	0.413366	0.281	0.127	6.87198e-05	DN B	HTNVvsHealth
FAM96A1	1.924e-08	0.413116	0.283	0.137	0.000410792	DN B	HTNVvsHealth
ZFP36L21	2.56051e-06	0.413077	0.881	0.756	0.0546694	DN B	HTNVvsHealth
NUCKS11	2.7142e-10	0.412968	0.45	0.232	5.79508e-06	DN B	HTNVvsHealth
EZR1	1.82483e-10	0.412029	0.902	0.703	3.89619e-06	DN B	HTNVvsHealth
DYNLRB1	7.67662e-10	0.410498	0.354	0.175	1.63904e-05	DN B	HTNVvsHealth
NDUFA14	2.38619e-10	0.410132	0.658	0.413	5.09476e-06	DN B	HTNVvsHealth
PIK3IP11	4.87124e-11	0.407257	0.335	0.142	1.04006e-06	DN B	HTNVvsHealth
NEAT11	1.69809e-08	0.406796	0.571	0.343	0.00036256	DN B	HTNVvsHealth
ALDOA1	1.56952e-12	0.405642	0.81	0.52	3.35108e-08	DN B	HTNVvsHealth
NAA10	3.33103e-10	0.404298	0.272	0.113	7.11208e-06	DN B	HTNVvsHealth
C14orf21	5.61549e-10	0.396392	0.295	0.129	1.19896e-05	DN B	HTNVvsHealth
MT-ND21	3.56947e-11	0.395389	0.475	0.231	7.62118e-07	DN B	HTNVvsHealth
EIF5A	4.9843e-10	0.395055	0.808	0.557	1.0642e-05	DN B	HTNVvsHealth
CNOT1	1.37702e-10	0.392314	0.337	0.148	2.94007e-06	DN B	HTNVvsHealth
MAPK1IP1L1	2.02856e-11	0.392034	0.452	0.216	4.33119e-07	DN B	HTNVvsHealth
TLE1	6.01888e-09	0.391346	0.29	0.127	0.000128509	DN B	HTNVvsHealth
RCSD11	1.04708e-08	0.389499	0.761	0.518	0.000223562	DN B	HTNVvsHealth
ATP5A1	1.39886e-08	0.388372	0.276	0.127	0.00029867	DN B	HTNVvsHealth
ELOB1	3.2794e-09	0.38779	0.717	0.47	7.00185e-05	DN B	HTNVvsHealth
RPS26	3.10008e-10	0.386887	0.48	0.231	6.61899e-06	DN B	HTNVvsHealth
TAF1D1	1.01772e-10	0.385751	0.539	0.293	2.17294e-06	DN B	HTNVvsHealth
RNMT1	8.96659e-08	0.384629	0.295	0.148	0.00191446	DN B	HTNVvsHealth
TRA2A	8.95313e-12	0.38441	0.426	0.201	1.91158e-07	DN B	HTNVvsHealth
PCIF1	3.07769e-10	0.383519	0.398	0.196	6.57118e-06	DN B	HTNVvsHealth
LSM7	7.48907e-10	0.382289	0.782	0.511	1.59899e-05	DN B	HTNVvsHealth
UPF2	2.2672e-10	0.376502	0.323	0.146	4.84071e-06	DN B	HTNVvsHealth
TMEM258	5.4166e-11	0.373411	0.588	0.338	1.1565e-06	DN B	HTNVvsHealth
RIOK3	1.42003e-10	0.373196	0.335	0.146	3.0319e-06	DN B	HTNVvsHealth
ATP5I	2.30196e-06	0.36962	0.279	0.153	0.0491491	DN B	HTNVvsHealth
COX6C	7.18974e-10	0.368091	0.796	0.546	1.53508e-05	DN B	HTNVvsHealth
MT-ND51	3.04972e-09	0.366969	0.475	0.234	6.51147e-05	DN B	HTNVvsHealth
ATP5ME	4.21384e-05	0.364887	0.251	0.14	0.899696	DN B	HTNVvsHealth
UGCG	3.45329e-10	0.358318	0.267	0.105	7.37312e-06	DN B	HTNVvsHealth
KTN11	9.68359e-09	0.356797	0.454	0.258	0.000206754	DN B	HTNVvsHealth
BTG1	2.82848e-07	0.354163	0.96	0.91	0.00603908	DN B	HTNVvsHealth
IGLC2	1.40336e-06	0.345492	0.342	0.188	0.0299632	DN B	HTNVvsHealth
POLR2L1	3.07348e-09	0.345385	0.557	0.325	6.56219e-05	DN B	HTNVvsHealth
MT-ATP61	6.21118e-09	0.344891	0.471	0.234	0.000132615	DN B	HTNVvsHealth
EIF1B1	1.374e-08	0.344119	0.581	0.345	0.000293363	DN B	HTNVvsHealth
ADGRE5	1.95179e-07	0.343044	0.335	0.17	0.00416726	DN B	HTNVvsHealth
POMP	1.62299e-09	0.342072	0.475	0.255	3.46524e-05	DN B	HTNVvsHealth
YPEL51	1.51883e-08	0.338439	0.44	0.247	0.000324285	DN B	HTNVvsHealth
COPS9	1.81722e-08	0.336767	0.365	0.194	0.000387994	DN B	HTNVvsHealth
ARHGDIA	4.56011e-09	0.335752	0.637	0.387	9.7363e-05	DN B	HTNVvsHealth
ILF21	1.26335e-11	0.333391	0.48	0.231	2.69737e-07	DN B	HTNVvsHealth
PAK2	3.47872e-10	0.332388	0.511	0.269	7.42741e-06	DN B	HTNVvsHealth
STK17B1	1.97459e-11	0.331544	0.602	0.332	4.21595e-07	DN B	HTNVvsHealth
ITM2C	1.71065e-07	0.3306	0.286	0.142	0.00365241	DN B	HTNVvsHealth
TCF251	1.40175e-08	0.33031	0.529	0.306	0.000299289	DN B	HTNVvsHealth
FCRL2	3.43455e-07	0.329035	0.26	0.125	0.00733312	DN B	HTNVvsHealth
TMA7	8.46285e-06	0.327454	0.925	0.732	0.18069	DN B	HTNVvsHealth
ATP5F1E	0.28111	0.327112	0.492	0.609	1	DN B	HTNVvsHealth
POU2F2	4.16629e-07	0.325069	0.721	0.504	0.00889544	DN B	HTNVvsHealth
LAPTM51	8.2732e-07	0.323945	0.981	0.928	0.0176641	DN B	HTNVvsHealth
PARP15	3.55417e-08	0.322415	0.335	0.166	0.000758852	DN B	HTNVvsHealth
NAA38	7.90188e-08	0.322352	0.354	0.188	0.00168713	DN B	HTNVvsHealth
FAU	4.13521e-07	0.32168	1	1	0.00882909	DN B	HTNVvsHealth
LYRM2	1.36065e-09	0.320294	0.279	0.113	2.90512e-05	DN B	HTNVvsHealth
CD19	1.43832e-06	0.320238	0.515	0.341	0.0307097	DN B	HTNVvsHealth
SRPRA	8.86672e-10	0.31984	0.319	0.142	1.89313e-05	DN B	HTNVvsHealth
HSP90AB1	4.75495e-05	0.318714	0.92	0.792	1	DN B	HTNVvsHealth
HMGA1	1.66742e-08	0.316553	0.464	0.26	0.00035601	DN B	HTNVvsHealth
DDX24	1.01992e-08	0.316249	0.527	0.304	0.000217763	DN B	HTNVvsHealth
PHF201	5.37567e-08	0.313244	0.438	0.245	0.00114776	DN B	HTNVvsHealth
UBE2B	3.6553e-08	0.311636	0.489	0.282	0.000780443	DN B	HTNVvsHealth
AES1	3.55796e-06	0.31048	0.314	0.183	0.075966	DN B	HTNVvsHealth
MT-ND41	9.68815e-10	0.309988	0.473	0.232	2.06852e-05	DN B	HTNVvsHealth
CTSH	7.91055e-08	0.309847	0.621	0.402	0.00168898	DN B	HTNVvsHealth
EMP3	8.04368e-05	0.308295	0.857	0.727	1	DN B	HTNVvsHealth
REL1	1.7598e-10	0.30634	0.569	0.315	3.75735e-06	DN B	HTNVvsHealth
RBM391	6.93542e-08	0.305334	0.763	0.526	0.00148078	DN B	HTNVvsHealth
COX17	8.23617e-07	0.304948	0.389	0.225	0.0175851	DN B	HTNVvsHealth
IQGAP11	9.5585e-10	0.303376	0.52	0.293	2.04084e-05	DN B	HTNVvsHealth
CREBRF1	9.09067e-10	0.300396	0.29	0.12	1.94095e-05	DN B	HTNVvsHealth
MRPL52	1.3003e-06	0.296656	0.438	0.273	0.0277627	DN B	HTNVvsHealth
LYN	1.58574e-09	0.296	0.546	0.31	3.38571e-05	DN B	HTNVvsHealth
NDUFB21	3.97075e-07	0.29566	0.553	0.365	0.00847795	DN B	HTNVvsHealth
TOMM5	5.62951e-07	0.294905	0.485	0.303	0.0120196	DN B	HTNVvsHealth
SNRPG	1.02852e-07	0.293514	0.513	0.314	0.002196	DN B	HTNVvsHealth
MT-ATP81	1.0925e-08	0.292979	0.48	0.234	0.000233259	DN B	HTNVvsHealth
HIF1A1	1.07605e-08	0.291905	0.361	0.175	0.000229748	DN B	HTNVvsHealth
SNRPA1	1.03375e-08	0.289377	0.368	0.186	0.000220716	DN B	HTNVvsHealth
TERF2IP	1.81479e-08	0.289235	0.482	0.275	0.000387475	DN B	HTNVvsHealth
CYCS1	1.52449e-07	0.289194	0.539	0.334	0.00325494	DN B	HTNVvsHealth
SELENOK	5.18191e-09	0.288997	0.433	0.223	0.000110639	DN B	HTNVvsHealth
MT-ND31	3.66542e-08	0.288874	0.485	0.234	0.000782603	DN B	HTNVvsHealth
NR1H2	3.90785e-07	0.286613	0.372	0.212	0.00834365	DN B	HTNVvsHealth
CD551	9.7395e-08	0.284442	0.518	0.306	0.00207948	DN B	HTNVvsHealth
SAT2	2.50347e-07	0.281064	0.33	0.173	0.00534515	DN B	HTNVvsHealth
ETFB	1.97903e-07	0.278165	0.372	0.205	0.00422544	DN B	HTNVvsHealth
ERGIC11	1.90184e-08	0.277486	0.311	0.146	0.000406063	DN B	HTNVvsHealth
HLA-DRB1	1.21922e-09	0.277111	0.986	0.91	2.60316e-05	DN B	HTNVvsHealth
SRRM11	3.62686e-08	0.276767	0.665	0.419	0.000774372	DN B	HTNVvsHealth
ISG20	1.05238e-07	0.272493	0.857	0.661	0.00224694	DN B	HTNVvsHealth
TNRC6B1	7.24077e-08	0.271531	0.424	0.231	0.00154598	DN B	HTNVvsHealth
TLK1	3.23716e-10	0.270911	0.342	0.149	6.91166e-06	DN B	HTNVvsHealth
RSF1	5.61656e-07	0.270153	0.384	0.214	0.0119919	DN B	HTNVvsHealth
HAGHL	1.13425e-05	0.269405	0.297	0.168	0.242173	DN B	HTNVvsHealth
GTF2B	5.68319e-07	0.268872	0.297	0.151	0.0121342	DN B	HTNVvsHealth
EIF5B	1.41301e-05	0.268149	0.29	0.168	0.301692	DN B	HTNVvsHealth
SNRPN	1.81119e-07	0.266393	0.351	0.19	0.00386707	DN B	HTNVvsHealth
BCAS2	9.63922e-08	0.266299	0.283	0.133	0.00205807	DN B	HTNVvsHealth
IFT57	5.03026e-08	0.264394	0.536	0.306	0.00107401	DN B	HTNVvsHealth
EPC11	1.08786e-08	0.263061	0.637	0.38	0.000232268	DN B	HTNVvsHealth
SP140L	1.01805e-06	0.261193	0.265	0.133	0.0217363	DN B	HTNVvsHealth
ATF7IP2	2.64874e-06	0.260493	0.267	0.137	0.0565533	DN B	HTNVvsHealth
FXR1	5.44713e-07	0.259849	0.368	0.201	0.0116302	DN B	HTNVvsHealth
ACADVL	4.74745e-08	0.259363	0.384	0.194	0.00101363	DN B	HTNVvsHealth
MATR3.1	6.09386e-08	0.258682	0.424	0.238	0.0013011	DN B	HTNVvsHealth
CDK5RAP3	1.32434e-06	0.258244	0.372	0.214	0.028276	DN B	HTNVvsHealth
LY6E1	2.44347e-06	0.257218	0.778	0.568	0.0521704	DN B	HTNVvsHealth
TCEA1	5.29839e-05	0.256664	0.766	0.565	1	DN B	HTNVvsHealth
SNRPE	5.11441e-07	0.256306	0.375	0.208	0.0109198	DN B	HTNVvsHealth
COX7A2	1.75919e-06	0.253815	0.745	0.509	0.0375605	DN B	HTNVvsHealth
UBB	0.000571913	0.252806	0.885	0.738	1	DN B	HTNVvsHealth
ZC3H15	1.09023e-05	0.25223	0.52	0.341	0.232775	DN B	HTNVvsHealth
PLPP51	1.44494e-05	0.250872	0.321	0.181	0.308509	DN B	HTNVvsHealth
ARID5B	3.85979e-07	0.250797	0.508	0.301	0.00824104	DN B	HTNVvsHealth
LSM21	0.854865	-0.250517	0.37	0.33	1	DN B	HTNVvsHealth
MRPS6	0.899163	-0.25058	0.365	0.317	1	DN B	HTNVvsHealth
NPM11	0.0010142	-0.251606	0.967	0.93	1	DN B	HTNVvsHealth
CCDC321	0.450046	-0.251657	0.265	0.216	1	DN B	HTNVvsHealth
NCKAP1L	0.999634	-0.252238	0.258	0.236	1	DN B	HTNVvsHealth
ZFP36L11	0.021939	-0.253543	0.731	0.705	1	DN B	HTNVvsHealth
TES	0.686906	-0.254664	0.283	0.244	1	DN B	HTNVvsHealth
RNF167	0.914536	-0.256187	0.316	0.284	1	DN B	HTNVvsHealth
THOC7	0.716805	-0.256257	0.283	0.245	1	DN B	HTNVvsHealth
NME3	0.540213	-0.256945	0.356	0.29	1	DN B	HTNVvsHealth
GHITM	0.870965	-0.257124	0.445	0.373	1	DN B	HTNVvsHealth
EIF4E	0.952433	-0.257224	0.255	0.232	1	DN B	HTNVvsHealth
C9orf161	0.745069	-0.257279	0.588	0.504	1	DN B	HTNVvsHealth
MEAF61	0.833118	-0.258117	0.452	0.369	1	DN B	HTNVvsHealth
ARPC51	0.586872	-0.258286	0.457	0.413	1	DN B	HTNVvsHealth
S100A41	0.559465	-0.25946	0.646	0.594	1	DN B	HTNVvsHealth
DHPS	0.970556	-0.259512	0.297	0.268	1	DN B	HTNVvsHealth
EIF4B	0.133258	-0.260954	0.77	0.67	1	DN B	HTNVvsHealth
SNX21	0.277624	-0.261197	0.721	0.624	1	DN B	HTNVvsHealth
CFL11	0.000183131	-0.261428	0.972	0.946	1	DN B	HTNVvsHealth
GUK1	0.701579	-0.262148	0.562	0.485	1	DN B	HTNVvsHealth
BAZ1A	0.889985	-0.262233	0.29	0.264	1	DN B	HTNVvsHealth
CAPZA2	0.863427	-0.262597	0.304	0.269	1	DN B	HTNVvsHealth
RASSF1	0.547476	-0.262676	0.335	0.277	1	DN B	HTNVvsHealth
RNF126	0.342928	-0.262834	0.375	0.293	1	DN B	HTNVvsHealth
RNASEK1	0.0112529	-0.264011	0.806	0.769	1	DN B	HTNVvsHealth
EIF4A21	0.0595512	-0.264206	0.721	0.644	1	DN B	HTNVvsHealth
GNAI2	0.929732	-0.264585	0.365	0.317	1	DN B	HTNVvsHealth
PLCG2	0.450509	-0.264753	0.328	0.271	1	DN B	HTNVvsHealth
SEPTIN71	0.0981596	-0.265183	0.319	0.347	1	DN B	HTNVvsHealth
RIC3	0.975093	-0.265361	0.295	0.269	1	DN B	HTNVvsHealth
CALM1	0.0210939	-0.265409	0.869	0.823	1	DN B	HTNVvsHealth
ERH1	0.593628	-0.266894	0.569	0.483	1	DN B	HTNVvsHealth
EIF3A	0.808604	-0.267434	0.34	0.312	1	DN B	HTNVvsHealth
ACP5	0.720864	-0.268022	0.447	0.399	1	DN B	HTNVvsHealth
BST21	0.83741	-0.268097	0.316	0.29	1	DN B	HTNVvsHealth
WDR1	0.917606	-0.268294	0.403	0.341	1	DN B	HTNVvsHealth
SNRNP70	0.865601	-0.269291	0.311	0.286	1	DN B	HTNVvsHealth
DAP3	0.660958	-0.269392	0.3	0.253	1	DN B	HTNVvsHealth
GNG51	0.42017	-0.269702	0.529	0.483	1	DN B	HTNVvsHealth
NACA1	2.40842e-09	-0.272986	0.993	0.996	5.14223e-05	DN B	HTNVvsHealth
HMGN4	0.989237	-0.273164	0.337	0.295	1	DN B	HTNVvsHealth
VDAC21	0.709758	-0.273195	0.485	0.43	1	DN B	HTNVvsHealth
ISCU	0.146776	-0.274685	0.761	0.649	1	DN B	HTNVvsHealth
RHOF	0.682679	-0.275244	0.377	0.317	1	DN B	HTNVvsHealth
DDX51	0.000413574	-0.275745	0.944	0.884	1	DN B	HTNVvsHealth
SS18L2	0.776313	-0.275968	0.288	0.269	1	DN B	HTNVvsHealth
TBCB	0.960928	-0.277189	0.468	0.411	1	DN B	HTNVvsHealth
ARPC21	0.000249041	-0.277756	0.822	0.814	1	DN B	HTNVvsHealth
PDCD61	0.58051	-0.277917	0.417	0.38	1	DN B	HTNVvsHealth
ATP5MG1	0.00185294	-0.278446	0.468	0.587	1	DN B	HTNVvsHealth
PPP1R181	0.717826	-0.280014	0.45	0.378	1	DN B	HTNVvsHealth
ARL5A1	0.762613	-0.281104	0.377	0.323	1	DN B	HTNVvsHealth
TMED10	0.860552	-0.281553	0.316	0.279	1	DN B	HTNVvsHealth
HSPE1	0.674967	-0.282101	0.466	0.415	1	DN B	HTNVvsHealth
TLN1	0.610813	-0.28255	0.279	0.236	1	DN B	HTNVvsHealth
QRSL11	0.149649	-0.282999	0.281	0.303	1	DN B	HTNVvsHealth
ST131	0.265441	-0.283124	0.646	0.555	1	DN B	HTNVvsHealth
EIF2A	0.653478	-0.283335	0.269	0.258	1	DN B	HTNVvsHealth
ZFAND6	0.365429	-0.284197	0.375	0.362	1	DN B	HTNVvsHealth
B2M	3.36488e-13	-0.284443	1	1	7.18436e-09	DN B	HTNVvsHealth
SSU72	0.846091	-0.284919	0.468	0.4	1	DN B	HTNVvsHealth
SRP72	0.833671	-0.284953	0.286	0.247	1	DN B	HTNVvsHealth
HSD17B11	0.488078	-0.285097	0.349	0.284	1	DN B	HTNVvsHealth
BRK11	0.157127	-0.285347	0.593	0.537	1	DN B	HTNVvsHealth
RBBP6	0.669939	-0.285902	0.351	0.327	1	DN B	HTNVvsHealth
BTN3A2	0.900779	-0.286102	0.265	0.232	1	DN B	HTNVvsHealth
2025-03-01	0.577368	-0.286476	0.546	0.463	1	DN B	HTNVvsHealth
CALR1	0.446452	-0.286722	0.621	0.496	1	DN B	HTNVvsHealth
BIRC3	0.791053	-0.286949	0.436	0.369	1	DN B	HTNVvsHealth
BUB3	0.86427	-0.288569	0.363	0.325	1	DN B	HTNVvsHealth
AC243960.1	0.636586	-0.289317	0.309	0.293	1	DN B	HTNVvsHealth
SLC25A31	0.249953	-0.291697	0.728	0.618	1	DN B	HTNVvsHealth
UBA521	9.24096e-10	-0.292172	0.986	0.991	1.97304e-05	DN B	HTNVvsHealth
SRSF3	0.781584	-0.292793	0.473	0.389	1	DN B	HTNVvsHealth
RHBDF2	0.441315	-0.293168	0.258	0.207	1	DN B	HTNVvsHealth
ELOVL51	0.696045	-0.294206	0.443	0.393	1	DN B	HTNVvsHealth
GPI	0.709577	-0.294329	0.34	0.282	1	DN B	HTNVvsHealth
ANAPC5	0.850284	-0.294571	0.333	0.286	1	DN B	HTNVvsHealth
GPX4	0.120015	-0.294747	0.689	0.614	1	DN B	HTNVvsHealth
HLA-DMA1	0.00669033	-0.295213	0.827	0.756	1	DN B	HTNVvsHealth
RIPOR2	0.0528433	-0.295214	0.707	0.631	1	DN B	HTNVvsHealth
ITGB2	0.563356	-0.29523	0.337	0.315	1	DN B	HTNVvsHealth
PRDX11	0.395044	-0.295337	0.522	0.47	1	DN B	HTNVvsHealth
DOCK8	0.892914	-0.295957	0.333	0.299	1	DN B	HTNVvsHealth
MKRN1	0.800966	-0.296554	0.272	0.234	1	DN B	HTNVvsHealth
IL2RG1	0.0642162	-0.296895	0.731	0.655	1	DN B	HTNVvsHealth
PSMF1	0.222071	-0.298063	0.356	0.268	1	DN B	HTNVvsHealth
ZBTB38	0.899987	-0.298578	0.251	0.221	1	DN B	HTNVvsHealth
SH3BGRL1	0.120361	-0.299175	0.649	0.583	1	DN B	HTNVvsHealth
SOD11	0.0258049	-0.299681	0.656	0.6	1	DN B	HTNVvsHealth
H2AFV	0.909168	-0.300504	0.302	0.264	1	DN B	HTNVvsHealth
TRMT1121	0.328702	-0.300706	0.639	0.555	1	DN B	HTNVvsHealth
MYL12A1	0.000246668	-0.301773	0.909	0.889	1	DN B	HTNVvsHealth
SKP11	0.0452203	-0.302102	0.81	0.688	1	DN B	HTNVvsHealth
EIF3E1	0.0108153	-0.302158	0.801	0.753	1	DN B	HTNVvsHealth
CTSS	0.545969	-0.302965	0.635	0.537	1	DN B	HTNVvsHealth
ACTR31	0.309261	-0.303067	0.595	0.52	1	DN B	HTNVvsHealth
PTPRC1	0.00124666	-0.303246	0.82	0.753	1	DN B	HTNVvsHealth
RAB11A	0.814883	-0.304311	0.351	0.319	1	DN B	HTNVvsHealth
CD401	0.503182	-0.304722	0.415	0.38	1	DN B	HTNVvsHealth
MRPL34	0.725149	-0.304796	0.253	0.238	1	DN B	HTNVvsHealth
ZNHIT1	0.84714	-0.305183	0.29	0.247	1	DN B	HTNVvsHealth
OSTF11	0.544052	-0.307436	0.487	0.424	1	DN B	HTNVvsHealth
IL16	0.981171	-0.308904	0.478	0.404	1	DN B	HTNVvsHealth
POLR1D1	0.456879	-0.309594	0.422	0.378	1	DN B	HTNVvsHealth
EIF3F1	0.000136873	-0.311493	0.892	0.839	1	DN B	HTNVvsHealth
RGS191	0.755621	-0.312963	0.473	0.413	1	DN B	HTNVvsHealth
SELENOW	0.191783	-0.313037	0.361	0.362	1	DN B	HTNVvsHealth
CD1641	0.74569	-0.313971	0.37	0.332	1	DN B	HTNVvsHealth
ARPC1B1	0.00611619	-0.314812	0.794	0.738	1	DN B	HTNVvsHealth
CLTA	0.826856	-0.315231	0.321	0.286	1	DN B	HTNVvsHealth
ZNF581	0.347757	-0.315655	0.307	0.299	1	DN B	HTNVvsHealth
MOB1A1	0.7341	-0.317043	0.438	0.386	1	DN B	HTNVvsHealth
YPEL3	0.586458	-0.317058	0.438	0.386	1	DN B	HTNVvsHealth
ANXA4	0.198877	-0.317638	0.293	0.304	1	DN B	HTNVvsHealth
CLNS1A	0.347551	-0.318655	0.347	0.334	1	DN B	HTNVvsHealth
PSMB81	0.2165	-0.31979	0.595	0.53	1	DN B	HTNVvsHealth
GTF3C6	0.482224	-0.319882	0.276	0.266	1	DN B	HTNVvsHealth
PTGES31	0.0254991	-0.31991	0.681	0.64	1	DN B	HTNVvsHealth
SSNA1	0.797559	-0.322661	0.316	0.269	1	DN B	HTNVvsHealth
EEF1G1	7.81882e-09	-0.32286	0.991	0.974	0.00016694	DN B	HTNVvsHealth
CDKN2D	0.487696	-0.323275	0.302	0.292	1	DN B	HTNVvsHealth
NDUFS7	0.57357	-0.323376	0.398	0.354	1	DN B	HTNVvsHealth
SPTAN1	0.884423	-0.323413	0.251	0.227	1	DN B	HTNVvsHealth
LY86	0.335935	-0.323515	0.604	0.522	1	DN B	HTNVvsHealth
NDUFS3	0.850341	-0.324822	0.279	0.253	1	DN B	HTNVvsHealth
SLC25A39	0.885205	-0.324935	0.258	0.234	1	DN B	HTNVvsHealth
AC119396.1	0.0422866	-0.326107	0.279	0.315	1	DN B	HTNVvsHealth
FLNA	0.463735	-0.326599	0.347	0.323	1	DN B	HTNVvsHealth
COX7A2L1	0.864631	-0.326857	0.466	0.397	1	DN B	HTNVvsHealth
POLR2G	0.743526	-0.327098	0.3	0.273	1	DN B	HTNVvsHealth
DDX39B	0.200719	-0.328283	0.309	0.308	1	DN B	HTNVvsHealth
PCMT1	0.73437	-0.329019	0.265	0.244	1	DN B	HTNVvsHealth
ACAP1	0.291858	-0.329539	0.525	0.472	1	DN B	HTNVvsHealth
EEF1A11	2.54318e-15	-0.329836	1	1	5.42994e-11	DN B	HTNVvsHealth
BLCAP	0.580033	-0.33007	0.274	0.26	1	DN B	HTNVvsHealth
COX4I11	3.84755e-07	-0.33174	0.974	0.963	0.0082149	DN B	HTNVvsHealth
PTRHD1	0.9283	-0.332468	0.293	0.26	1	DN B	HTNVvsHealth
HLA-DMB1	0.172312	-0.33278	0.576	0.522	1	DN B	HTNVvsHealth
ASAH1	0.992866	-0.332821	0.328	0.286	1	DN B	HTNVvsHealth
CTSZ	0.673784	-0.333215	0.297	0.275	1	DN B	HTNVvsHealth
PYURF1	0.849128	-0.334448	0.426	0.363	1	DN B	HTNVvsHealth
RBX11	0.178427	-0.334848	0.459	0.421	1	DN B	HTNVvsHealth
EEF21	1.53963e-09	-0.33521	0.984	0.985	3.28726e-05	DN B	HTNVvsHealth
CDK2AP2	0.0922386	-0.335559	0.251	0.28	1	DN B	HTNVvsHealth
VPS511	0.703559	-0.335968	0.358	0.321	1	DN B	HTNVvsHealth
PRDX2	0.537711	-0.336272	0.34	0.319	1	DN B	HTNVvsHealth
PITHD1	0.282424	-0.33651	0.265	0.271	1	DN B	HTNVvsHealth
CALM3	0.705839	-0.336615	0.297	0.273	1	DN B	HTNVvsHealth
PSMB91	8.66345e-05	-0.33663	0.756	0.755	1	DN B	HTNVvsHealth
LSP11	3.01103e-05	-0.336652	0.92	0.858	0.642885	DN B	HTNVvsHealth
RTN4	0.407065	-0.33701	0.267	0.26	1	DN B	HTNVvsHealth
METTL26	0.545804	-0.337415	0.342	0.314	1	DN B	HTNVvsHealth
HSP90AA1	0.00874988	-0.338165	0.763	0.705	1	DN B	HTNVvsHealth
MTDH	0.809691	-0.338274	0.66	0.541	1	DN B	HTNVvsHealth
ATM	0.437107	-0.340843	0.349	0.325	1	DN B	HTNVvsHealth
CD241	0.344053	-0.341157	0.478	0.446	1	DN B	HTNVvsHealth
CD47	0.390337	-0.341456	0.417	0.384	1	DN B	HTNVvsHealth
FCMR1	0.000598165	-0.342313	0.731	0.692	1	DN B	HTNVvsHealth
BANF11	0.543177	-0.342651	0.368	0.341	1	DN B	HTNVvsHealth
TRAF3IP31	0.11045	-0.342846	0.508	0.493	1	DN B	HTNVvsHealth
HMGN11	0.00943113	-0.345784	0.763	0.673	1	DN B	HTNVvsHealth
EIF3K1	1.54063e-05	-0.346094	0.876	0.867	0.328939	DN B	HTNVvsHealth
CAPZA11	0.32527	-0.346246	0.468	0.426	1	DN B	HTNVvsHealth
PDCD2	0.156777	-0.347045	0.234	0.253	1	DN B	HTNVvsHealth
PFDN51	4.75784e-09	-0.347482	0.972	0.959	0.000101585	DN B	HTNVvsHealth
VAMP21	0.0099203	-0.347666	0.583	0.579	1	DN B	HTNVvsHealth
TWF2	0.611029	-0.34845	0.295	0.273	1	DN B	HTNVvsHealth
TMEM591	0.364883	-0.350181	0.459	0.415	1	DN B	HTNVvsHealth
PARP11	0.509731	-0.350306	0.541	0.465	1	DN B	HTNVvsHealth
ARHGAP25	0.363996	-0.35078	0.311	0.306	1	DN B	HTNVvsHealth
SRPK2	0.721212	-0.35105	0.297	0.269	1	DN B	HTNVvsHealth
CMTM7	0.118302	-0.354162	0.258	0.277	1	DN B	HTNVvsHealth
GABARAP1	0.000215836	-0.354698	0.885	0.834	1	DN B	HTNVvsHealth
ADD11	0.577919	-0.355508	0.297	0.277	1	DN B	HTNVvsHealth
GAPT	0.147158	-0.355623	0.26	0.273	1	DN B	HTNVvsHealth
PNOC	0.457495	-0.355897	0.283	0.273	1	DN B	HTNVvsHealth
SYPL11	0.100757	-0.35611	0.609	0.559	1	DN B	HTNVvsHealth
MS4A11	2.87752e-10	-0.358434	0.939	0.939	6.14379e-06	DN B	HTNVvsHealth
SRSF1	0.311607	-0.358508	0.269	0.269	1	DN B	HTNVvsHealth
EDF11	0.0223142	-0.360098	0.787	0.686	1	DN B	HTNVvsHealth
RASGRP21	0.241483	-0.360255	0.588	0.522	1	DN B	HTNVvsHealth
RANBP1	0.299024	-0.360611	0.279	0.277	1	DN B	HTNVvsHealth
ATP5F1D1	0.00133467	-0.360968	0.386	0.47	1	DN B	HTNVvsHealth
MFF	0.173561	-0.361835	0.29	0.295	1	DN B	HTNVvsHealth
FXYD51	9.87726e-07	-0.362949	0.918	0.884	0.0210889	DN B	HTNVvsHealth
LINC009261	0.00611721	-0.364254	0.74	0.679	1	DN B	HTNVvsHealth
MSN1	0.131712	-0.364353	0.482	0.458	1	DN B	HTNVvsHealth
TNFAIP81	0.079501	-0.365756	0.513	0.493	1	DN B	HTNVvsHealth
SRSF51	5.15265e-05	-0.366823	0.785	0.742	1	DN B	HTNVvsHealth
EIF3L1	0.00517867	-0.366972	0.782	0.716	1	DN B	HTNVvsHealth
SELENOF1	0.127722	-0.36706	0.513	0.472	1	DN B	HTNVvsHealth
MAT2B1	0.295069	-0.367372	0.375	0.363	1	DN B	HTNVvsHealth
SHISA5	0.737287	-0.368475	0.412	0.358	1	DN B	HTNVvsHealth
ATP5F1C	0.0771427	-0.369499	0.262	0.286	1	DN B	HTNVvsHealth
ATP5PB	0.049453	-0.371196	0.304	0.336	1	DN B	HTNVvsHealth
SUMO21	3.03258e-05	-0.371287	0.862	0.827	0.647486	DN B	HTNVvsHealth
CNBP1	0.000299186	-0.371314	0.815	0.762	1	DN B	HTNVvsHealth
DYNLL1	0.0994312	-0.37143	0.419	0.421	1	DN B	HTNVvsHealth
CCNG1	0.885261	-0.37154	0.258	0.236	1	DN B	HTNVvsHealth
P2RX5	0.988375	-0.372307	0.475	0.4	1	DN B	HTNVvsHealth
SDHD	0.198764	-0.375296	0.253	0.266	1	DN B	HTNVvsHealth
FTL1	2.72553e-12	-0.376375	0.988	1	5.81927e-08	DN B	HTNVvsHealth
C1QBP1	0.0382394	-0.377028	0.494	0.482	1	DN B	HTNVvsHealth
PPDPF1	2.08462e-05	-0.379192	0.85	0.838	0.445088	DN B	HTNVvsHealth
SSR41	0.0890441	-0.380071	0.698	0.592	1	DN B	HTNVvsHealth
PLEKHF21	0.106293	-0.380164	0.321	0.339	1	DN B	HTNVvsHealth
KHDRBS11	0.224311	-0.381226	0.457	0.421	1	DN B	HTNVvsHealth
CD991	0.0405005	-0.381555	0.696	0.642	1	DN B	HTNVvsHealth
ARL6IP51	0.00115672	-0.383558	0.674	0.642	1	DN B	HTNVvsHealth
PLP2	0.0155729	-0.383868	0.735	0.677	1	DN B	HTNVvsHealth
NPC2	0.366152	-0.384143	0.372	0.351	1	DN B	HTNVvsHealth
FMNL1	0.390606	-0.384371	0.265	0.256	1	DN B	HTNVvsHealth
EIF3D1	0.0323228	-0.386196	0.553	0.504	1	DN B	HTNVvsHealth
PTP4A2	0.794351	-0.388293	0.344	0.286	1	DN B	HTNVvsHealth
TMEM230	0.460713	-0.389032	0.412	0.375	1	DN B	HTNVvsHealth
CD521	4.11157e-12	-0.389927	0.981	0.987	8.77861e-08	DN B	HTNVvsHealth
R3HDM41	0.24173	-0.391414	0.447	0.404	1	DN B	HTNVvsHealth
DHRS7	0.0641775	-0.392456	0.276	0.304	1	DN B	HTNVvsHealth
UBE2N1	0.131284	-0.392502	0.504	0.47	1	DN B	HTNVvsHealth
ATP6V0E11	0.00714122	-0.39317	0.66	0.609	1	DN B	HTNVvsHealth
CCT6A	0.488814	-0.398025	0.351	0.319	1	DN B	HTNVvsHealth
CHCHD101	0.0291879	-0.401142	0.677	0.622	1	DN B	HTNVvsHealth
CCT4	0.183861	-0.401694	0.391	0.375	1	DN B	HTNVvsHealth
SFPQ	0.141343	-0.40196	0.321	0.33	1	DN B	HTNVvsHealth
CLIC11	3.26645e-07	-0.402478	0.876	0.871	0.00697419	DN B	HTNVvsHealth
ARHGDIB1	1.65677e-10	-0.402911	0.944	0.943	3.53737e-06	DN B	HTNVvsHealth
MRPS34	0.069355	-0.404258	0.368	0.371	1	DN B	HTNVvsHealth
MMADHC	0.0998673	-0.406151	0.246	0.269	1	DN B	HTNVvsHealth
PSMB8-AS11	0.168329	-0.407179	0.314	0.312	1	DN B	HTNVvsHealth
PABPC4	0.64408	-0.409768	0.281	0.258	1	DN B	HTNVvsHealth
HLA-DRA1	1.7874e-17	-0.411632	0.995	1	3.81627e-13	DN B	HTNVvsHealth
EGLN2	0.0822135	-0.411832	0.251	0.273	1	DN B	HTNVvsHealth
DCK1	0.113563	-0.41309	0.328	0.328	1	DN B	HTNVvsHealth
SEPTIN61	0.0189623	-0.413175	0.323	0.356	1	DN B	HTNVvsHealth
ARL6IP4	0.00266455	-0.413565	0.679	0.618	1	DN B	HTNVvsHealth
PCED1B-AS1	0.0222505	-0.416211	0.288	0.327	1	DN B	HTNVvsHealth
CD741	2.5871e-23	-0.41706	1	1	5.52371e-19	DN B	HTNVvsHealth
CSTB	0.0772419	-0.418168	0.323	0.336	1	DN B	HTNVvsHealth
SNX171	0.345968	-0.419237	0.384	0.358	1	DN B	HTNVvsHealth
SCIMP	0.0663361	-0.41991	0.412	0.408	1	DN B	HTNVvsHealth
CCNDBP1	0.149127	-0.420523	0.328	0.334	1	DN B	HTNVvsHealth
AP1S2	0.167834	-0.42222	0.288	0.292	1	DN B	HTNVvsHealth
GSTK1	0.00748358	-0.424493	0.674	0.635	1	DN B	HTNVvsHealth
SRSF91	0.199074	-0.427332	0.34	0.33	1	DN B	HTNVvsHealth
SNX31	0.0067362	-0.427339	0.71	0.651	1	DN B	HTNVvsHealth
APBB1IP1	0.0488515	-0.429485	0.393	0.402	1	DN B	HTNVvsHealth
S100A11	0.0683735	-0.429963	0.326	0.345	1	DN B	HTNVvsHealth
NDUFA111	0.00678552	-0.429999	0.452	0.472	1	DN B	HTNVvsHealth
TRBC21	0.00660059	-0.432756	0.473	0.489	1	DN B	HTNVvsHealth
PSMA2	0.0704626	-0.433375	0.288	0.303	1	DN B	HTNVvsHealth
CCDC18-AS1	0.00774268	-0.435411	0.234	0.28	1	DN B	HTNVvsHealth
PFN11	8.84152e-13	-0.435983	0.965	0.982	1.88775e-08	DN B	HTNVvsHealth
CIAO2A	0.0050595	-0.436321	0.281	0.339	1	DN B	HTNVvsHealth
CD821	0.000898443	-0.443325	0.595	0.611	1	DN B	HTNVvsHealth
IKZF11	0.084597	-0.444638	0.41	0.397	1	DN B	HTNVvsHealth
MAP3K1	0.0707623	-0.446132	0.246	0.269	1	DN B	HTNVvsHealth
PSMG2	0.0709714	-0.448932	0.295	0.312	1	DN B	HTNVvsHealth
MYH9	0.124252	-0.453701	0.489	0.465	1	DN B	HTNVvsHealth
MICOS10	0.01029	-0.455539	0.225	0.271	1	DN B	HTNVvsHealth
STK17A1	0.0596934	-0.456657	0.344	0.356	1	DN B	HTNVvsHealth
GNB21	0.00994026	-0.456973	0.473	0.478	1	DN B	HTNVvsHealth
IKZF31	0.013057	-0.459389	0.34	0.369	1	DN B	HTNVvsHealth
NDUFV1	0.14889	-0.461567	0.349	0.339	1	DN B	HTNVvsHealth
RBBP41	0.030454	-0.461924	0.342	0.362	1	DN B	HTNVvsHealth
KRT101	0.0904571	-0.462784	0.468	0.432	1	DN B	HTNVvsHealth
CCDC85B1	0.0789254	-0.463277	0.417	0.4	1	DN B	HTNVvsHealth
MZT2B1	0.00553022	-0.463425	0.368	0.397	1	DN B	HTNVvsHealth
SRI	0.0177637	-0.465999	0.319	0.351	1	DN B	HTNVvsHealth
RBM3	9.57796e-05	-0.467655	0.78	0.736	1	DN B	HTNVvsHealth
PDCD41	0.10223	-0.468611	0.438	0.417	1	DN B	HTNVvsHealth
IFI161	0.122757	-0.468667	0.328	0.33	1	DN B	HTNVvsHealth
MYL12B1	0.000130868	-0.469585	0.761	0.71	1	DN B	HTNVvsHealth
ADK1	0.14788	-0.472534	0.337	0.332	1	DN B	HTNVvsHealth
EEF1B21	1.593e-13	-0.475026	0.988	0.998	3.40121e-09	DN B	HTNVvsHealth
ATP5F1B	0.000118737	-0.475081	0.337	0.426	1	DN B	HTNVvsHealth
DDAH2	0.041638	-0.476523	0.288	0.312	1	DN B	HTNVvsHealth
ITGB1	0.114061	-0.479105	0.412	0.395	1	DN B	HTNVvsHealth
NDUFC2	0.0395082	-0.481685	0.265	0.292	1	DN B	HTNVvsHealth
FBL1	0.0172432	-0.481804	0.466	0.454	1	DN B	HTNVvsHealth
CSK1	0.0110399	-0.484512	0.48	0.483	1	DN B	HTNVvsHealth
LIMD21	1.52379e-12	-0.485097	0.927	0.9	3.25345e-08	DN B	HTNVvsHealth
TOMM61	0.00580325	-0.485144	0.321	0.365	1	DN B	HTNVvsHealth
HNRNPF1	0.00100437	-0.485348	0.501	0.513	1	DN B	HTNVvsHealth
ODC1	0.0466145	-0.492027	0.389	0.395	1	DN B	HTNVvsHealth
ANXA2	0.000567139	-0.49307	0.475	0.518	1	DN B	HTNVvsHealth
LSM6	0.0203856	-0.494874	0.222	0.262	1	DN B	HTNVvsHealth
MZT2A	0.0733232	-0.494892	0.326	0.332	1	DN B	HTNVvsHealth
ITGA41	0.05448	-0.49748	0.349	0.363	1	DN B	HTNVvsHealth
SPI11	0.0143384	-0.498726	0.316	0.339	1	DN B	HTNVvsHealth
UCP21	4.21306e-09	-0.499432	0.808	0.847	8.9953e-05	DN B	HTNVvsHealth
OAZ11	6.37947e-15	-0.500824	0.963	0.963	1.36208e-10	DN B	HTNVvsHealth
NDUFB81	0.015087	-0.50337	0.358	0.375	1	DN B	HTNVvsHealth
LTA4H1	0.0241371	-0.505319	0.295	0.323	1	DN B	HTNVvsHealth
ZNF7061	0.000259224	-0.505363	0.513	0.542	1	DN B	HTNVvsHealth
PTPN61	2.57885e-06	-0.512467	0.726	0.731	0.0550609	DN B	HTNVvsHealth
SLC9A3R1	0.0144964	-0.518471	0.225	0.266	1	DN B	HTNVvsHealth
LITAF1	0.0154849	-0.52063	0.422	0.428	1	DN B	HTNVvsHealth
PPIA1	3.95181e-18	-0.521583	0.977	0.98	8.43751e-14	DN B	HTNVvsHealth
IMP31	0.000563373	-0.522699	0.319	0.389	1	DN B	HTNVvsHealth
GLIPR11	0.00419683	-0.533567	0.272	0.321	1	DN B	HTNVvsHealth
SPIB1	0.00351563	-0.544028	0.571	0.554	1	DN B	HTNVvsHealth
ADAM28	0.000363774	-0.545307	0.377	0.428	1	DN B	HTNVvsHealth
SH3BGRL31	1.877e-12	-0.545375	0.932	0.939	4.00759e-08	DN B	HTNVvsHealth
SELL1	0.00410164	-0.547066	0.607	0.596	1	DN B	HTNVvsHealth
FNTA	0.0116299	-0.553283	0.225	0.264	1	DN B	HTNVvsHealth
ZFAS11	4.22705e-05	-0.558852	0.41	0.498	0.902517	DN B	HTNVvsHealth
STUB1	0.0263738	-0.560998	0.241	0.268	1	DN B	HTNVvsHealth
MARCKSL11	0.0470079	-0.561237	0.279	0.303	1	DN B	HTNVvsHealth
H3F3A1	2.71525e-19	-0.562656	0.951	0.959	5.79733e-15	DN B	HTNVvsHealth
SNHG291	3.61093e-08	-0.567919	0.473	0.627	0.00077097	DN B	HTNVvsHealth
RAP1B1	1.99929e-05	-0.572294	0.452	0.509	0.426869	DN B	HTNVvsHealth
ACTB1	5.76751e-26	-0.572435	0.995	1	1.23142e-21	DN B	HTNVvsHealth
SSPN	0.00446874	-0.587075	0.213	0.269	1	DN B	HTNVvsHealth
ICAM31	6.46513e-06	-0.593819	0.487	0.539	0.138037	DN B	HTNVvsHealth
PNRC11	1.28672e-08	-0.599418	0.742	0.76	0.000274728	DN B	HTNVvsHealth
CORO1A1	2.36337e-18	-0.601199	0.897	0.924	5.04602e-14	DN B	HTNVvsHealth
FLI1	0.000962927	-0.615198	0.431	0.458	1	DN B	HTNVvsHealth
ARF61	0.00356588	-0.623097	0.445	0.446	1	DN B	HTNVvsHealth
HVCN11	1.57564e-05	-0.623324	0.562	0.576	0.336414	DN B	HTNVvsHealth
GAS51	4.26083e-08	-0.637448	0.443	0.592	0.00090973	DN B	HTNVvsHealth
TLR10	0.000214765	-0.639732	0.208	0.29	1	DN B	HTNVvsHealth
AHNAK	0.0133526	-0.639767	0.564	0.544	1	DN B	HTNVvsHealth
NOP531	9.38143e-11	-0.648653	0.836	0.828	2.00303e-06	DN B	HTNVvsHealth
YBX11	4.16679e-16	-0.661108	0.855	0.845	8.89652e-12	DN B	HTNVvsHealth
TUBB1	1.22182e-09	-0.697509	0.555	0.625	2.60872e-05	DN B	HTNVvsHealth
HHEX1	2.7321e-05	-0.698574	0.208	0.299	0.58333	DN B	HTNVvsHealth
ATP5PO1	1.13582e-08	-0.707958	0.396	0.518	0.000242508	DN B	HTNVvsHealth
CYBA1	1.97328e-23	-0.710125	0.857	0.919	4.21314e-19	DN B	HTNVvsHealth
S1PR4	1.11683e-07	-0.727168	0.208	0.334	0.00238455	DN B	HTNVvsHealth
CALM21	9.27105e-15	-0.735896	0.745	0.782	1.97946e-10	DN B	HTNVvsHealth
HLA-DPB11	7.78925e-39	-0.742066	0.979	0.991	1.66308e-34	DN B	HTNVvsHealth
EVI2B1	8.20607e-12	-0.767074	0.693	0.718	1.75208e-07	DN B	HTNVvsHealth
ID3	1.48073e-05	-0.768405	0.211	0.317	0.316151	DN B	HTNVvsHealth
ATP5F1A	1.77035e-09	-0.781085	0.311	0.445	3.77987e-05	DN B	HTNVvsHealth
TMSB4X1	5.88777e-42	-0.790146	0.995	1	1.2571e-37	DN B	HTNVvsHealth
IGKV3-20	2.193e-11	-0.798161	0.361	0.137	4.68228e-07	DN B	HTNVvsHealth
HSPA81	9.75767e-21	-0.801472	0.787	0.867	2.08336e-16	DN B	HTNVvsHealth
HLA-DRB51	3.37143e-22	-0.804096	0.813	0.93	7.19834e-18	DN B	HTNVvsHealth
LTB1	3.28748e-29	-0.806293	0.911	0.972	7.01909e-25	DN B	HTNVvsHealth
IFI30	9.34891e-08	-0.806897	0.279	0.415	0.00199609	DN B	HTNVvsHealth
TPT11	1.07461e-62	-0.868381	0.995	1	2.2944e-58	DN B	HTNVvsHealth
TRIR1	4.75346e-19	-0.901035	0.562	0.686	1.01491e-14	DN B	HTNVvsHealth
S100A10	7.74635e-09	-0.925953	0.642	0.67	0.000165392	DN B	HTNVvsHealth
ACTG11	3.66405e-33	-1.00997	0.869	0.93	7.82311e-29	DN B	HTNVvsHealth
SNHG71	7.18285e-13	-1.03923	0.108	0.282	1.53361e-08	DN B	HTNVvsHealth
TLE51	4.84678e-11	-1.08416	0.286	0.435	1.03484e-06	DN B	HTNVvsHealth
HLA-DQA21	2.3725e-10	-1.10296	0.295	0.439	5.06552e-06	DN B	HTNVvsHealth
AC004687.1	2.26439e-17	-1.14533	0.103	0.319	4.8347e-13	DN B	HTNVvsHealth
COCH	2.5951e-09	-1.16273	0.143	0.279	5.54079e-05	DN B	HTNVvsHealth
CRIP2	1.75612e-12	-1.35367	0.169	0.345	3.74949e-08	DN B	HTNVvsHealth
CD692	4.16533e-41	1.6853	0.706	0.195	8.89339e-37	TLM	HTNVvsHealth
KLF62	4.5143e-34	1.43413	0.91	0.573	9.63849e-30	TLM	HTNVvsHealth
DUSP2	1.38051e-13	1.31913	0.287	0.073	2.94753e-09	TLM	HTNVvsHealth
UBC2	4.70094e-40	1.27704	0.991	0.881	1.0037e-35	TLM	HTNVvsHealth
FOS1	1.10543e-16	1.19341	0.319	0.073	2.36021e-12	TLM	HTNVvsHealth
PPP1R15A2	5.71359e-30	1.18456	0.681	0.25	1.21991e-25	TLM	HTNVvsHealth
TSC22D32	5.15625e-31	1.18295	0.988	0.866	1.10091e-26	TLM	HTNVvsHealth
2025-06-02	4.37325e-14	1.10335	0.706	0.436	9.33733e-10	TLM	HTNVvsHealth
DUSP12	7.74878e-20	0.979906	0.852	0.524	1.65444e-15	TLM	HTNVvsHealth
NFKBIA2	3.26962e-14	0.97545	0.718	0.415	6.98097e-10	TLM	HTNVvsHealth
CD832	4.98591e-16	0.911812	0.4	0.128	1.06454e-11	TLM	HTNVvsHealth
TXNIP2	3.35351e-11	0.886593	0.972	0.918	7.16007e-07	TLM	HTNVvsHealth
IFITM11	9.4577e-26	0.848698	0.792	0.354	2.01931e-21	TLM	HTNVvsHealth
RHOB1	8.13651e-12	0.83838	0.479	0.232	1.73723e-07	TLM	HTNVvsHealth
PELI12	1.8105e-22	0.80469	0.514	0.149	3.86561e-18	TLM	HTNVvsHealth
GADD45B2	4.16615e-15	0.803134	0.465	0.186	8.89516e-11	TLM	HTNVvsHealth
ATP5F1E1	1.17438e-06	0.801297	0.516	0.457	0.0250743	TLM	HTNVvsHealth
NEAT12	2.84284e-16	0.791559	0.72	0.399	6.06974e-12	TLM	HTNVvsHealth
PRDX6	4.92335e-17	0.76014	0.667	0.351	1.05119e-12	TLM	HTNVvsHealth
GAPDH	4.04905e-16	0.715256	0.986	0.933	8.64512e-12	TLM	HTNVvsHealth
IGLC21	0.00155674	0.713222	0.435	0.299	1	TLM	HTNVvsHealth
PLPP52	4.38609e-12	0.712474	0.463	0.223	9.36474e-08	TLM	HTNVvsHealth
DDX212	6.58175e-15	0.70847	0.567	0.265	1.40527e-10	TLM	HTNVvsHealth
ATP5ME1	2.24756e-14	0.70557	0.31	0.073	4.79877e-10	TLM	HTNVvsHealth
HERPUD12	9.87653e-12	0.70415	0.741	0.479	2.10874e-07	TLM	HTNVvsHealth
HIST1H4C2	6.3285e-16	0.695258	0.743	0.418	1.3512e-11	TLM	HTNVvsHealth
RHOH1	3.16386e-20	0.693654	0.764	0.399	6.75516e-16	TLM	HTNVvsHealth
CFLAR2	2.04105e-18	0.691432	0.644	0.302	4.35784e-14	TLM	HTNVvsHealth
EIF5A1	5.04171e-19	0.680126	0.866	0.555	1.07645e-14	TLM	HTNVvsHealth
IRF12	2.26528e-09	0.674939	0.523	0.29	4.8366e-05	TLM	HTNVvsHealth
CRIP11	1.1187e-08	0.655222	0.896	0.768	0.000238855	TLM	HTNVvsHealth
MAP3K82	3.04328e-11	0.653901	0.558	0.293	6.4977e-07	TLM	HTNVvsHealth
SLC2A32	5.8931e-13	0.651536	0.491	0.223	1.25824e-08	TLM	HTNVvsHealth
CTSH1	5.60963e-16	0.637821	0.748	0.433	1.19771e-11	TLM	HTNVvsHealth
EMP31	1.32575e-11	0.633767	0.935	0.744	2.83061e-07	TLM	HTNVvsHealth
PTPRCAP2	8.09999e-22	0.632087	0.984	0.817	1.72943e-17	TLM	HTNVvsHealth
HSPA52	1.05139e-15	0.631691	0.59	0.271	2.24483e-11	TLM	HTNVvsHealth
HCST	3.02604e-13	0.619645	0.37	0.125	6.4609e-09	TLM	HTNVvsHealth
YBX31	3.30832e-11	0.61755	0.387	0.155	7.0636e-07	TLM	HTNVvsHealth
NDUFA15	1.27978e-18	0.61383	0.787	0.451	2.73245e-14	TLM	HTNVvsHealth
SBDS2	9.85159e-17	0.607323	0.521	0.204	2.10341e-12	TLM	HTNVvsHealth
MYC1	2.15813e-09	0.603999	0.516	0.271	4.60781e-05	TLM	HTNVvsHealth
SEC61G1	1.73171e-18	0.603489	0.671	0.32	3.69738e-14	TLM	HTNVvsHealth
TKT	3.75785e-11	0.603021	0.676	0.436	8.02339e-07	TLM	HTNVvsHealth
SAT12	1.3218e-10	0.599422	0.819	0.601	2.82217e-06	TLM	HTNVvsHealth
EZR2	7.79095e-14	0.598163	0.919	0.668	1.66345e-09	TLM	HTNVvsHealth
C4orf48	3.79306e-16	0.592119	0.519	0.213	8.09857e-12	TLM	HTNVvsHealth
ADGRE51	1.13591e-13	0.588985	0.495	0.204	2.42528e-09	TLM	HTNVvsHealth
TCIRG11	2.87942e-13	0.586404	0.546	0.265	6.14784e-09	TLM	HTNVvsHealth
ZFP362	1.18334e-05	0.585268	0.866	0.716	0.252655	TLM	HTNVvsHealth
POMP1	2.82239e-16	0.583059	0.662	0.345	6.02609e-12	TLM	HTNVvsHealth
CYTIP1	9.39739e-13	0.578638	0.604	0.314	2.00644e-08	TLM	HTNVvsHealth
ACADVL1	1.86413e-16	0.567188	0.525	0.213	3.9801e-12	TLM	HTNVvsHealth
HIST1H1C	1.46555e-14	0.559792	0.389	0.125	3.1291e-10	TLM	HTNVvsHealth
STK17B2	1.61985e-13	0.55792	0.699	0.393	3.45855e-09	TLM	HTNVvsHealth
COX6C1	3.35969e-14	0.548251	0.863	0.643	7.17328e-10	TLM	HTNVvsHealth
ATP5MD	1.81913e-09	0.547467	0.363	0.149	3.88403e-05	TLM	HTNVvsHealth
MAPK1IP1L2	4.09566e-14	0.543151	0.562	0.262	8.74465e-10	TLM	HTNVvsHealth
CCDC61	6.93602e-15	0.542024	0.306	0.073	1.48091e-10	TLM	HTNVvsHealth
ATP5MF	4.91366e-08	0.53876	0.368	0.177	0.00104912	TLM	HTNVvsHealth
PMAIP12	2.11476e-13	0.536257	0.354	0.11	4.51523e-09	TLM	HTNVvsHealth
HIF1A2	1.64101e-13	0.534856	0.431	0.168	3.50372e-09	TLM	HTNVvsHealth
ANXA21	3.46451e-09	0.531465	0.604	0.375	7.39708e-05	TLM	HTNVvsHealth
VIM	1.80225e-13	0.529515	0.947	0.848	3.84798e-09	TLM	HTNVvsHealth
HMGA11	6.06784e-15	0.529075	0.625	0.302	1.29555e-10	TLM	HTNVvsHealth
CXCR42	2.28201e-09	0.521739	0.769	0.5	4.87233e-05	TLM	HTNVvsHealth
IGLV2-141	1.50489e-07	0.518873	0.262	0.098	0.00321309	TLM	HTNVvsHealth
NFKBID1	2.99093e-09	0.514962	0.345	0.143	6.38593e-05	TLM	HTNVvsHealth
ROMO11	1.31235e-14	0.514859	0.6	0.299	2.802e-10	TLM	HTNVvsHealth
COX7C2	4.35438e-16	0.514767	0.979	0.848	9.29704e-12	TLM	HTNVvsHealth
COX6B1	2.69703e-13	0.504043	0.866	0.622	5.75842e-09	TLM	HTNVvsHealth
CYCS2	2.75854e-13	0.503063	0.627	0.323	5.88977e-09	TLM	HTNVvsHealth
GPR1831	9.86299e-11	0.499556	0.606	0.351	2.10585e-06	TLM	HTNVvsHealth
PTPN12	2.50236e-15	0.497303	0.725	0.372	5.34278e-11	TLM	HTNVvsHealth
GUK11	9.20471e-13	0.494734	0.725	0.436	1.9653e-08	TLM	HTNVvsHealth
PCBP22	2.24236e-08	0.489408	0.965	0.814	0.000478765	TLM	HTNVvsHealth
G3BP22	7.05767e-15	0.488363	0.558	0.238	1.50688e-10	TLM	HTNVvsHealth
JUND2	2.21372e-12	0.487423	0.405	0.159	4.72652e-08	TLM	HTNVvsHealth
SRGN	2.02544e-09	0.486087	0.512	0.256	4.32451e-05	TLM	HTNVvsHealth
HSPD1	1.09846e-10	0.483317	0.532	0.28	2.34532e-06	TLM	HTNVvsHealth
HIST1H2BK	2.87821e-15	0.482094	0.417	0.131	6.14526e-11	TLM	HTNVvsHealth
MTHFD2	9.12926e-14	0.478645	0.264	0.055	1.94919e-09	TLM	HTNVvsHealth
CDK11A	2.34375e-11	0.478397	0.292	0.091	5.00414e-07	TLM	HTNVvsHealth
COX14	4.75361e-13	0.475582	0.59	0.293	1.01494e-08	TLM	HTNVvsHealth
ARPC52	2.71987e-10	0.47128	0.678	0.445	5.80719e-06	TLM	HTNVvsHealth
ELOB2	2.41497e-13	0.470094	0.826	0.524	5.15621e-09	TLM	HTNVvsHealth
LY6E2	8.26897e-14	0.466773	0.938	0.71	1.76551e-09	TLM	HTNVvsHealth
MRPL521	1.77184e-11	0.464959	0.574	0.311	3.78306e-07	TLM	HTNVvsHealth
NUCKS12	9.08261e-13	0.464696	0.562	0.277	1.93923e-08	TLM	HTNVvsHealth
JPT1	3.54868e-10	0.46469	0.468	0.235	7.5768e-06	TLM	HTNVvsHealth
LY91	4.27884e-06	0.463107	0.289	0.146	0.0913576	TLM	HTNVvsHealth
COX7A21	7.93007e-13	0.457086	0.843	0.582	1.69315e-08	TLM	HTNVvsHealth
SLC25A5	5.26123e-10	0.456317	0.873	0.71	1.12333e-05	TLM	HTNVvsHealth
DBI	9.42406e-10	0.455556	0.731	0.479	2.01213e-05	TLM	HTNVvsHealth
ACAA2	1.23036e-14	0.451309	0.336	0.088	2.62693e-10	TLM	HTNVvsHealth
FCRL5	3.41332e-09	0.450627	0.458	0.232	7.28777e-05	TLM	HTNVvsHealth
RPLP02	0.00404176	0.449746	0.477	0.439	1	TLM	HTNVvsHealth
ATF7IP21	4.76785e-10	0.448509	0.373	0.159	1.01798e-05	TLM	HTNVvsHealth
HLA-DRB11	1.16318e-10	0.447267	0.998	0.973	2.4835e-06	TLM	HTNVvsHealth
PLAC81	0.000436945	0.446993	0.796	0.683	1	TLM	HTNVvsHealth
TMSB10	6.01557e-15	0.444482	0.998	1	1.28439e-10	TLM	HTNVvsHealth
IER21	0.0005729	0.442662	0.678	0.527	1	TLM	HTNVvsHealth
CCT81	3.14606e-12	0.436199	0.56	0.287	6.71714e-08	TLM	HTNVvsHealth
YPEL52	1.23703e-11	0.435596	0.606	0.326	2.64119e-07	TLM	HTNVvsHealth
S100A6	3.49196e-05	0.435284	0.801	0.646	0.745569	TLM	HTNVvsHealth
RHOC	1.84469e-10	0.433363	0.329	0.119	3.9386e-06	TLM	HTNVvsHealth
TCF252	5.68101e-13	0.432955	0.639	0.332	1.21295e-08	TLM	HTNVvsHealth
PLIN2	2.65654e-11	0.430828	0.28	0.079	5.67197e-07	TLM	HTNVvsHealth
IFITM2	6.05069e-12	0.430769	0.912	0.692	1.29188e-07	TLM	HTNVvsHealth
TUBA1A2	3.60858e-08	0.430735	0.597	0.372	0.000770468	TLM	HTNVvsHealth
IGHG1	2.43793e-07	0.428992	0.532	0.323	0.00520522	TLM	HTNVvsHealth
RPL36AL2	0.0029274	0.427121	0.456	0.409	1	TLM	HTNVvsHealth
PFKP	1.57991e-13	0.422688	0.255	0.049	3.37326e-09	TLM	HTNVvsHealth
TRA2B2	6.6935e-12	0.422285	0.676	0.375	1.42913e-07	TLM	HTNVvsHealth
RNF19A1	5.33035e-12	0.421958	0.394	0.149	1.13808e-07	TLM	HTNVvsHealth
UBB1	4.226e-10	0.420245	0.94	0.747	9.02293e-06	TLM	HTNVvsHealth
ARPC5L	2.17847e-10	0.411752	0.637	0.39	4.65126e-06	TLM	HTNVvsHealth
MRPL40	2.33863e-10	0.411212	0.553	0.296	4.99321e-06	TLM	HTNVvsHealth
EBI3	3.43596e-10	0.407121	0.296	0.104	7.33612e-06	TLM	HTNVvsHealth
POLR2L2	1.51652e-08	0.406743	0.662	0.43	0.000323793	TLM	HTNVvsHealth
SERTAD3	1.13065e-10	0.406725	0.273	0.082	2.41405e-06	TLM	HTNVvsHealth
TMA71	1.96264e-08	0.406642	0.961	0.802	0.000419044	TLM	HTNVvsHealth
ITGB21	2.87498e-08	0.404477	0.602	0.378	0.000613838	TLM	HTNVvsHealth
HSP90AB11	7.66154e-08	0.404164	0.947	0.82	0.00163582	TLM	HTNVvsHealth
H3F3B1	6.30964e-06	0.403804	0.991	0.957	0.134717	TLM	HTNVvsHealth
SEC61B	1.22617e-09	0.402911	0.757	0.521	2.618e-05	TLM	HTNVvsHealth
BZW11	3.78309e-13	0.401576	0.542	0.241	8.07728e-09	TLM	HTNVvsHealth
LSM71	4.50702e-10	0.401034	0.875	0.631	9.62294e-06	TLM	HTNVvsHealth
TAP1	2.27759e-11	0.399547	0.544	0.274	4.86288e-07	TLM	HTNVvsHealth
SNHG15	1.39977e-09	0.399191	0.336	0.137	2.98865e-05	TLM	HTNVvsHealth
MTPN	9.2735e-11	0.398737	0.741	0.488	1.97999e-06	TLM	HTNVvsHealth
BACH1	4.13664e-10	0.398465	0.273	0.085	8.83214e-06	TLM	HTNVvsHealth
OVCA2	1.14259e-10	0.398064	0.294	0.095	2.43953e-06	TLM	HTNVvsHealth
RPL142	0.00146039	0.397735	0.475	0.439	1	TLM	HTNVvsHealth
MPST	1.92181e-11	0.396819	0.275	0.076	4.10325e-07	TLM	HTNVvsHealth
MAPRE1	2.71079e-10	0.396358	0.345	0.134	5.7878e-06	TLM	HTNVvsHealth
SRSF102	7.73608e-08	0.395981	0.644	0.427	0.00165173	TLM	HTNVvsHealth
CCND32	2.97323e-09	0.395693	0.711	0.457	6.34815e-05	TLM	HTNVvsHealth
CD1C	0.000154882	0.394385	0.562	0.415	1	TLM	HTNVvsHealth
SNHG8	6.27418e-08	0.393033	0.66	0.421	0.0013396	TLM	HTNVvsHealth
CLK1	6.22427e-11	0.39284	0.442	0.189	1.32894e-06	TLM	HTNVvsHealth
ILF22	1.22267e-11	0.392525	0.6	0.317	2.61053e-07	TLM	HTNVvsHealth
PSME21	5.20896e-11	0.390552	0.727	0.442	1.11217e-06	TLM	HTNVvsHealth
NBPF14	1.3472e-09	0.3891	0.438	0.21	2.87641e-05	TLM	HTNVvsHealth
HLA-B1	5.67541e-15	0.38697	1	1	1.21176e-10	TLM	HTNVvsHealth
LAPTM52	1.47614e-09	0.386862	0.991	0.957	3.1517e-05	TLM	HTNVvsHealth
RAB11FIP1	2.08031e-08	0.385788	0.303	0.128	0.000444167	TLM	HTNVvsHealth
GLO12	2.86404e-12	0.384746	0.53	0.247	6.11502e-08	TLM	HTNVvsHealth
RNMT2	9.6169e-09	0.384323	0.363	0.162	0.00020533	TLM	HTNVvsHealth
TAF1D2	3.35428e-10	0.382895	0.609	0.335	7.16173e-06	TLM	HTNVvsHealth
COX6A1	2.15804e-09	0.379156	0.907	0.753	4.60763e-05	TLM	HTNVvsHealth
MZB12	4.13023e-09	0.377988	0.451	0.229	8.81846e-05	TLM	HTNVvsHealth
UQCRFS1	4.34752e-12	0.377666	0.662	0.366	9.28238e-08	TLM	HTNVvsHealth
HSH2D	2.48888e-09	0.37634	0.588	0.338	5.31401e-05	TLM	HTNVvsHealth
NOP10	1.41801e-07	0.37627	0.567	0.366	0.0030276	TLM	HTNVvsHealth
SCPEP1	1.03634e-08	0.376229	0.366	0.162	0.000221268	TLM	HTNVvsHealth
COX7B	7.24682e-11	0.37569	0.627	0.369	1.54727e-06	TLM	HTNVvsHealth
RPL22L12	0.00363009	0.374499	0.398	0.314	1	TLM	HTNVvsHealth
FAM30A	2.80543e-05	0.372181	0.352	0.204	0.598988	TLM	HTNVvsHealth
LDHA	2.799e-08	0.370006	0.664	0.442	0.000597615	TLM	HTNVvsHealth
RPL282	0.00222074	0.369138	0.475	0.439	1	TLM	HTNVvsHealth
SCAND1	8.36425e-14	0.367029	0.757	0.424	1.78585e-09	TLM	HTNVvsHealth
UQCR11	3.43056e-09	0.366703	0.843	0.601	7.32459e-05	TLM	HTNVvsHealth
CIB1	9.13978e-05	0.365468	0.838	0.704	1	TLM	HTNVvsHealth
HLA-C1	5.26489e-12	0.365007	0.998	0.988	1.12411e-07	TLM	HTNVvsHealth
SERPINB1	3.16263e-09	0.362665	0.586	0.332	6.75252e-05	TLM	HTNVvsHealth
NDUFB4	2.79748e-11	0.362612	0.674	0.387	5.9729e-07	TLM	HTNVvsHealth
EIF2S2	1.13793e-08	0.36244	0.505	0.28	0.00024296	TLM	HTNVvsHealth
MX1	2.67156e-09	0.361961	0.465	0.232	5.70405e-05	TLM	HTNVvsHealth
ENO1	2.7326e-09	0.359559	0.752	0.509	5.83437e-05	TLM	HTNVvsHealth
GSTK11	3.56676e-08	0.358985	0.736	0.512	0.00076154	TLM	HTNVvsHealth
ALDOA2	9.61969e-08	0.358581	0.794	0.591	0.0020539	TLM	HTNVvsHealth
ATP6V1F	4.9703e-10	0.357877	0.757	0.479	1.06121e-05	TLM	HTNVvsHealth
PAK21	1.77414e-09	0.3574	0.653	0.393	3.78797e-05	TLM	HTNVvsHealth
LGALS9	1.56549e-12	0.35724	0.468	0.195	3.34247e-08	TLM	HTNVvsHealth
ARPC1B2	1.58576e-06	0.356275	0.894	0.759	0.0338576	TLM	HTNVvsHealth
MVD	4.99983e-11	0.356051	0.262	0.07	1.06751e-06	TLM	HTNVvsHealth
ATF4	4.55327e-11	0.354814	0.484	0.226	9.72169e-07	TLM	HTNVvsHealth
PGLS	1.70046e-10	0.354494	0.669	0.39	3.63066e-06	TLM	HTNVvsHealth
ETF1	6.53578e-08	0.352218	0.273	0.11	0.00139546	TLM	HTNVvsHealth
SP1001	1.90028e-10	0.350767	0.836	0.524	4.05728e-06	TLM	HTNVvsHealth
SON2	6.51383e-07	0.35057	0.801	0.576	0.0139077	TLM	HTNVvsHealth
UBE2L6	3.94163e-10	0.350279	0.544	0.28	8.41577e-06	TLM	HTNVvsHealth
COPS91	2.13714e-10	0.348198	0.542	0.271	4.56301e-06	TLM	HTNVvsHealth
WASF21	3.37951e-09	0.347832	0.711	0.448	7.2156e-05	TLM	HTNVvsHealth
NAP1L1	1.63839e-08	0.347823	0.771	0.527	0.000349813	TLM	HTNVvsHealth
ACAT2	7.99895e-09	0.347425	0.294	0.113	0.000170786	TLM	HTNVvsHealth
ECHS1	6.93317e-12	0.347347	0.442	0.183	1.4803e-07	TLM	HTNVvsHealth
NRROS	5.70568e-10	0.346523	0.419	0.177	1.21822e-05	TLM	HTNVvsHealth
ISG201	7.94188e-09	0.34492	0.935	0.735	0.000169567	TLM	HTNVvsHealth
TAGLN2	6.90352e-09	0.344535	0.921	0.771	0.000147397	TLM	HTNVvsHealth
SAP18	2.1024e-11	0.34343	0.808	0.503	4.48884e-07	TLM	HTNVvsHealth
NDUFS5	1.72583e-09	0.341289	0.604	0.345	3.68482e-05	TLM	HTNVvsHealth
TUBB4B	4.13725e-06	0.341122	0.336	0.177	0.0883345	TLM	HTNVvsHealth
TMC6	7.92249e-11	0.340113	0.454	0.204	1.69153e-06	TLM	HTNVvsHealth
DDX181	1.2884e-06	0.339682	0.472	0.284	0.0275087	TLM	HTNVvsHealth
MARCKS	3.65114e-09	0.3395	0.414	0.189	7.79556e-05	TLM	HTNVvsHealth
MIF	3.37125e-08	0.338383	0.928	0.787	0.000719795	TLM	HTNVvsHealth
RPL72	0.0199822	0.338247	0.468	0.427	1	TLM	HTNVvsHealth
RIOK31	5.30475e-11	0.337693	0.444	0.192	1.13262e-06	TLM	HTNVvsHealth
IDS1	1.96106e-07	0.337591	0.47	0.259	0.00418706	TLM	HTNVvsHealth
UQCRQ	2.31434e-10	0.336619	0.613	0.354	4.94135e-06	TLM	HTNVvsHealth
ATP5MG2	0.00341491	0.33625	0.493	0.402	1	TLM	HTNVvsHealth
SNRPG1	4.10366e-08	0.336226	0.625	0.378	0.000876173	TLM	HTNVvsHealth
ATP5G32	0.00710143	0.335583	0.384	0.314	1	TLM	HTNVvsHealth
UQCRB	1.75121e-08	0.334626	0.91	0.765	0.0003739	TLM	HTNVvsHealth
TIMM17B	7.26915e-10	0.333753	0.461	0.213	1.55204e-05	TLM	HTNVvsHealth
ZBTB32	3.32859e-09	0.333381	0.366	0.159	7.10687e-05	TLM	HTNVvsHealth
IDH2	1.92954e-09	0.332105	0.387	0.168	4.11975e-05	TLM	HTNVvsHealth
ATP6V0B	1.71538e-06	0.331763	0.704	0.494	0.036625	TLM	HTNVvsHealth
SNRPB	6.2008e-10	0.330516	0.722	0.427	1.32393e-05	TLM	HTNVvsHealth
SNRPD2	9.28753e-08	0.330022	0.924	0.774	0.00198298	TLM	HTNVvsHealth
NOP58	9.21248e-07	0.329731	0.477	0.271	0.0196696	TLM	HTNVvsHealth
SLC25A24	3.18888e-09	0.32907	0.255	0.082	6.80858e-05	TLM	HTNVvsHealth
PSAP	4.85327e-08	0.328911	0.859	0.625	0.00103622	TLM	HTNVvsHealth
TMEM2581	2.14949e-08	0.328472	0.725	0.491	0.000458938	TLM	HTNVvsHealth
YWHAZ	2.99994e-09	0.328127	0.972	0.878	6.40517e-05	TLM	HTNVvsHealth
UBE2J1	1.64066e-09	0.327884	0.611	0.341	3.50298e-05	TLM	HTNVvsHealth
RPS172	0.0165063	0.326748	0.449	0.396	1	TLM	HTNVvsHealth
KPNB1	6.57788e-09	0.326605	0.586	0.338	0.000140444	TLM	HTNVvsHealth
ARHGAP45	1.30929e-10	0.326233	0.6	0.311	2.79546e-06	TLM	HTNVvsHealth
SYTL1	3.78948e-09	0.32611	0.62	0.363	8.09093e-05	TLM	HTNVvsHealth
MRPL41	2.42568e-09	0.325646	0.539	0.29	5.17907e-05	TLM	HTNVvsHealth
PIK3IP12	4.84491e-06	0.325554	0.301	0.149	0.103444	TLM	HTNVvsHealth
DNAJC15	2.4644e-08	0.324176	0.593	0.354	0.000526173	TLM	HTNVvsHealth
RPL27A2	0.0515845	0.323927	0.468	0.43	1	TLM	HTNVvsHealth
TMEM256	1.0721e-08	0.323833	0.604	0.36	0.000228903	TLM	HTNVvsHealth
PPP2CA	1.67472e-08	0.323054	0.512	0.271	0.00035757	TLM	HTNVvsHealth
PFKL	3.17266e-10	0.322646	0.493	0.247	6.77394e-06	TLM	HTNVvsHealth
DYNC1LI1	2.47927e-08	0.322617	0.259	0.095	0.000529349	TLM	HTNVvsHealth
CD191	7.67813e-05	0.322463	0.787	0.655	1	TLM	HTNVvsHealth
FDPS	1.79165e-08	0.320427	0.414	0.204	0.000382535	TLM	HTNVvsHealth
COX5A	4.74824e-09	0.320227	0.743	0.497	0.00010138	TLM	HTNVvsHealth
ARHGDIA1	2.82699e-08	0.31972	0.729	0.473	0.00060359	TLM	HTNVvsHealth
STX10	1.2515e-07	0.317713	0.35	0.171	0.00267209	TLM	HTNVvsHealth
GMFG	4.13611e-07	0.316141	0.782	0.558	0.008831	TLM	HTNVvsHealth
GRB2	6.13579e-09	0.316108	0.829	0.576	0.000131005	TLM	HTNVvsHealth
RHOF1	4.15076e-10	0.315883	0.532	0.271	8.86229e-06	TLM	HTNVvsHealth
WDR43	4.40576e-09	0.315845	0.289	0.107	9.40673e-05	TLM	HTNVvsHealth
AKAP13	3.2896e-07	0.315588	0.655	0.415	0.00702363	TLM	HTNVvsHealth
ARF1	8.6427e-08	0.315506	0.787	0.546	0.0018453	TLM	HTNVvsHealth
CDC42	2.59535e-09	0.315023	0.838	0.628	5.54133e-05	TLM	HTNVvsHealth
FAU1	8.53607e-07	0.314879	0.998	1	0.0182254	TLM	HTNVvsHealth
PSMB3	4.24252e-09	0.314578	0.671	0.409	9.0582e-05	TLM	HTNVvsHealth
ERICH1	4.21363e-09	0.313308	0.38	0.165	8.99652e-05	TLM	HTNVvsHealth
PRDM21	7.51976e-08	0.310524	0.486	0.262	0.00160554	TLM	HTNVvsHealth
PET1002	2.36018e-08	0.309829	0.576	0.341	0.000503922	TLM	HTNVvsHealth
ECH1	3.06528e-08	0.309242	0.648	0.412	0.000654468	TLM	HTNVvsHealth
PGK1	1.73757e-06	0.309094	0.711	0.512	0.0370989	TLM	HTNVvsHealth
DDT	1.64346e-05	0.308196	0.637	0.433	0.350895	TLM	HTNVvsHealth
ARL6IP1	2.52596e-08	0.307405	0.641	0.372	0.000539318	TLM	HTNVvsHealth
NAPA	4.27791e-07	0.307381	0.438	0.238	0.00913376	TLM	HTNVvsHealth
UQCR10	1.73642e-09	0.307301	0.775	0.503	3.70744e-05	TLM	HTNVvsHealth
DNTTIP2	2.8936e-08	0.304254	0.373	0.174	0.000617813	TLM	HTNVvsHealth
FERMT3	1.97914e-08	0.303639	0.468	0.247	0.000422567	TLM	HTNVvsHealth
NDUFA32	1.45157e-07	0.30329	0.6	0.366	0.00309924	TLM	HTNVvsHealth
IGBP1	2.46389e-08	0.301959	0.562	0.332	0.000526065	TLM	HTNVvsHealth
PPIB	5.91398e-08	0.301676	0.88	0.652	0.00126269	TLM	HTNVvsHealth
COX5B	1.32697e-08	0.300982	0.838	0.652	0.000283321	TLM	HTNVvsHealth
CBX3	1.19247e-08	0.300362	0.558	0.314	0.000254604	TLM	HTNVvsHealth
CTSA	3.04266e-08	0.300133	0.312	0.131	0.000649639	TLM	HTNVvsHealth
ETFB1	5.66465e-09	0.300076	0.456	0.226	0.000120946	TLM	HTNVvsHealth
DDX3Y	2.23079e-07	0.299998	0.275	0.116	0.00476297	TLM	HTNVvsHealth
TYMP	2.52181e-08	0.299431	0.296	0.119	0.000538432	TLM	HTNVvsHealth
SNRPN1	5.45284e-07	0.298869	0.421	0.229	0.0116424	TLM	HTNVvsHealth
ANXA5	2.5106e-08	0.298209	0.407	0.201	0.000536038	TLM	HTNVvsHealth
MCM5	9.7575e-08	0.297808	0.428	0.229	0.00208332	TLM	HTNVvsHealth
JUNB2	0.00116522	0.297745	0.819	0.662	1	TLM	HTNVvsHealth
1972-09-01	0.00780861	0.297639	0.412	0.326	1	TLM	HTNVvsHealth
SNRPF	1.39943e-08	0.297307	0.521	0.293	0.000298792	TLM	HTNVvsHealth
ACP51	7.5218e-05	0.297214	0.632	0.47	1	TLM	HTNVvsHealth
GRHPR	1.07789e-07	0.296979	0.438	0.232	0.00230141	TLM	HTNVvsHealth
COX8A	1.92266e-09	0.296611	0.792	0.552	4.10507e-05	TLM	HTNVvsHealth
NAA381	1.99142e-08	0.296516	0.551	0.302	0.000425188	TLM	HTNVvsHealth
COPE1	4.93831e-09	0.296488	0.697	0.418	0.000105438	TLM	HTNVvsHealth
UPF21	1.77351e-06	0.295905	0.451	0.259	0.0378662	TLM	HTNVvsHealth
RSL24D1	4.44739e-08	0.295797	0.674	0.427	0.000949563	TLM	HTNVvsHealth
APH1A	4.78628e-09	0.295633	0.734	0.454	0.000102192	TLM	HTNVvsHealth
FABP5	7.09205e-10	0.295259	0.345	0.131	1.51422e-05	TLM	HTNVvsHealth
EVL	1.87666e-08	0.292541	0.741	0.47	0.000400686	TLM	HTNVvsHealth
SNX5	7.66939e-09	0.291973	0.519	0.274	0.000163749	TLM	HTNVvsHealth
PRDX5	2.30089e-08	0.291142	0.725	0.47	0.000491263	TLM	HTNVvsHealth
HLA-DQA1	3.64641e-06	0.289425	0.984	0.887	0.0778546	TLM	HTNVvsHealth
NDUFB22	4.35705e-10	0.288342	0.771	0.494	9.30273e-06	TLM	HTNVvsHealth
PDIA6	7.66869e-08	0.287531	0.544	0.311	0.00163734	TLM	HTNVvsHealth
IDI1	2.39882e-06	0.286804	0.4	0.22	0.0512172	TLM	HTNVvsHealth
HSPA4	2.61012e-09	0.286636	0.451	0.216	5.57286e-05	TLM	HTNVvsHealth
HSPA9	6.84566e-10	0.286474	0.498	0.238	1.46162e-05	TLM	HTNVvsHealth
THEMIS21	1.36501e-08	0.286415	0.37	0.165	0.000291444	TLM	HTNVvsHealth
VAMP8	8.92073e-09	0.284907	0.694	0.436	0.000190467	TLM	HTNVvsHealth
IQGAP12	5.31638e-07	0.284852	0.595	0.372	0.011351	TLM	HTNVvsHealth
ISG15	5.90882e-09	0.283184	0.382	0.168	0.000126159	TLM	HTNVvsHealth
ELF1	1.04665e-07	0.281837	0.542	0.305	0.0022347	TLM	HTNVvsHealth
UBL5	2.02796e-06	0.280863	0.771	0.561	0.043299	TLM	HTNVvsHealth
POLR2J	9.56326e-08	0.280584	0.491	0.268	0.00204185	TLM	HTNVvsHealth
TLE11	1.40835e-08	0.280368	0.315	0.122	0.000300696	TLM	HTNVvsHealth
BECN1	1.48809e-09	0.280121	0.4	0.174	3.17721e-05	TLM	HTNVvsHealth
DEGS1	3.2931e-07	0.280013	0.324	0.152	0.00703109	TLM	HTNVvsHealth
SEM1	7.44392e-08	0.278814	0.53	0.311	0.00158935	TLM	HTNVvsHealth
NDUFA6	2.88403e-09	0.278787	0.507	0.259	6.15769e-05	TLM	HTNVvsHealth
LLPH	9.08958e-06	0.278688	0.271	0.131	0.194072	TLM	HTNVvsHealth
VAMP5	4.97328e-10	0.278486	0.34	0.128	1.06184e-05	TLM	HTNVvsHealth
PSMD7	6.85294e-10	0.278337	0.537	0.284	1.46317e-05	TLM	HTNVvsHealth
ARF5	1.28751e-09	0.277917	0.683	0.412	2.74895e-05	TLM	HTNVvsHealth
S100A42	0.000737257	0.276336	0.597	0.436	1	TLM	HTNVvsHealth
SOD2	7.54642e-08	0.276274	0.35	0.159	0.00161124	TLM	HTNVvsHealth
RAD23A	6.67056e-10	0.276163	0.671	0.393	1.42423e-05	TLM	HTNVvsHealth
RBIS	8.65943e-07	0.275668	0.315	0.137	0.0184887	TLM	HTNVvsHealth
CCT7	1.12434e-08	0.275434	0.562	0.311	0.000240059	TLM	HTNVvsHealth
ZDHHC12	3.83391e-07	0.274941	0.347	0.168	0.00818579	TLM	HTNVvsHealth
DNAJB1	4.72532e-06	0.27492	0.262	0.122	0.10089	TLM	HTNVvsHealth
PHPT1	1.16429e-08	0.274163	0.4	0.186	0.000248588	TLM	HTNVvsHealth
TRAF4	3.18808e-05	0.273819	0.312	0.165	0.680687	TLM	HTNVvsHealth
NAA101	4.48618e-06	0.272458	0.37	0.201	0.0957844	TLM	HTNVvsHealth
TNIP2	7.89859e-09	0.272038	0.394	0.174	0.000168643	TLM	HTNVvsHealth
VDAC1	1.23693e-10	0.27176	0.525	0.259	2.64096e-06	TLM	HTNVvsHealth
H2AFJ	4.82066e-08	0.271371	0.273	0.107	0.00102926	TLM	HTNVvsHealth
PRRC2C1	1.96128e-07	0.270466	0.734	0.454	0.00418753	TLM	HTNVvsHealth
RHOA	6.05738e-07	0.270043	0.97	0.881	0.0129331	TLM	HTNVvsHealth
WAS	1.60443e-07	0.269382	0.699	0.445	0.00342561	TLM	HTNVvsHealth
IFI301	0.0431341	0.268849	0.53	0.43	1	TLM	HTNVvsHealth
HAGHL1	6.933e-09	0.268674	0.326	0.131	0.000148027	TLM	HTNVvsHealth
CHCHD5	1.74904e-09	0.266588	0.331	0.128	3.73437e-05	TLM	HTNVvsHealth
MPG	1.29114e-06	0.266323	0.525	0.311	0.0275672	TLM	HTNVvsHealth
PCBP1	4.06858e-06	0.266071	0.949	0.753	0.0868682	TLM	HTNVvsHealth
PDIA31	7.09482e-06	0.265418	0.655	0.454	0.151482	TLM	HTNVvsHealth
BIN2	1.77847e-07	0.265068	0.414	0.213	0.00379721	TLM	HTNVvsHealth
LAMTOR1	3.48955e-08	0.263536	0.713	0.451	0.000745055	TLM	HTNVvsHealth
RPL7A2	0.025402	0.263266	0.477	0.439	1	TLM	HTNVvsHealth
RPS32	0.0480848	0.263254	0.475	0.439	1	TLM	HTNVvsHealth
TIMM17A	3.19773e-07	0.263128	0.255	0.101	0.00682747	TLM	HTNVvsHealth
ATPIF12	0.0102436	0.2631	0.391	0.314	1	TLM	HTNVvsHealth
COTL1	0.000250067	0.26281	0.94	0.817	1	TLM	HTNVvsHealth
SUPT5H	6.93914e-07	0.262709	0.331	0.155	0.0148158	TLM	HTNVvsHealth
USMG51	0.00616388	0.262661	0.394	0.305	1	TLM	HTNVvsHealth
RWDD1	1.1092e-08	0.262572	0.593	0.323	0.000236826	TLM	HTNVvsHealth
DENR	4.94151e-08	0.261895	0.403	0.195	0.00105506	TLM	HTNVvsHealth
PSMB4	1.16546e-06	0.261887	0.396	0.204	0.0248836	TLM	HTNVvsHealth
CBWD2	4.19156e-07	0.261695	0.25	0.104	0.00894939	TLM	HTNVvsHealth
IFT571	1.31928e-05	0.261625	0.678	0.473	0.281679	TLM	HTNVvsHealth
TSSC4	5.65596e-06	0.261352	0.259	0.119	0.12076	TLM	HTNVvsHealth
PSMB2	5.05363e-10	0.260856	0.512	0.25	1.079e-05	TLM	HTNVvsHealth
DNAJC7	6.91097e-09	0.260474	0.384	0.165	0.000147556	TLM	HTNVvsHealth
PIN1	1.14183e-08	0.260347	0.465	0.232	0.000243792	TLM	HTNVvsHealth
FIBP	7.71086e-07	0.260042	0.451	0.247	0.0164635	TLM	HTNVvsHealth
PARP9	8.38339e-09	0.259782	0.273	0.095	0.000178994	TLM	HTNVvsHealth
PAPOLA	3.79602e-09	0.259512	0.583	0.317	8.10489e-05	TLM	HTNVvsHealth
EIF4A11	1.7277e-07	0.258985	0.708	0.448	0.00368881	TLM	HTNVvsHealth
BAZ2A	8.12618e-07	0.25858	0.396	0.216	0.0173502	TLM	HTNVvsHealth
TMED4	3.92441e-10	0.258383	0.475	0.229	8.37901e-06	TLM	HTNVvsHealth
FUS1	1.43704e-07	0.258207	0.727	0.485	0.00306822	TLM	HTNVvsHealth
TOR3A	1.1658e-08	0.258173	0.521	0.277	0.000248911	TLM	HTNVvsHealth
PMPCB	5.16817e-09	0.257642	0.463	0.226	0.000110346	TLM	HTNVvsHealth
SRRM12	7.93179e-06	0.257342	0.738	0.506	0.169352	TLM	HTNVvsHealth
SNRPE1	1.07972e-08	0.256848	0.479	0.247	0.000230531	TLM	HTNVvsHealth
GYPC	5.24747e-07	0.256196	0.65	0.421	0.0112039	TLM	HTNVvsHealth
RPL362	0.0593078	0.256192	0.475	0.439	1	TLM	HTNVvsHealth
PCGF5	6.10931e-07	0.255861	0.438	0.235	0.013044	TLM	HTNVvsHealth
MIR155HG	4.01696e-07	0.255769	0.266	0.11	0.00857661	TLM	HTNVvsHealth
ATP6V1E1	5.46437e-06	0.255702	0.278	0.134	0.11667	TLM	HTNVvsHealth
HNRNPDL	3.34358e-05	0.255648	0.961	0.838	0.713888	TLM	HTNVvsHealth
MRPS36	1.45909e-06	0.255615	0.435	0.238	0.0311531	TLM	HTNVvsHealth
EIF4A3	7.52041e-06	0.253288	0.282	0.14	0.160568	TLM	HTNVvsHealth
COPS2	3.50898e-08	0.25311	0.361	0.162	0.000749203	TLM	HTNVvsHealth
KXD1	2.2535e-07	0.253053	0.426	0.223	0.00481145	TLM	HTNVvsHealth
PSMA5	1.35689e-05	0.2528	0.458	0.284	0.289709	TLM	HTNVvsHealth
OLA1	1.19437e-06	0.252654	0.405	0.22	0.025501	TLM	HTNVvsHealth
SEC13	5.41812e-10	0.251872	0.454	0.204	1.15682e-05	TLM	HTNVvsHealth
STARD3	4.49102e-07	0.250765	0.292	0.128	0.00958877	TLM	HTNVvsHealth
IGHG3	4.24596e-06	0.25023	0.347	0.177	0.0906554	TLM	HTNVvsHealth
IGLC3	0.122392	-0.251219	0.396	0.299	1	TLM	HTNVvsHealth
UBE2I1	0.906403	-0.251633	0.729	0.631	1	TLM	HTNVvsHealth
SWAP70	0.977129	-0.25229	0.641	0.53	1	TLM	HTNVvsHealth
CD72	0.482324	-0.253428	0.544	0.491	1	TLM	HTNVvsHealth
PPIA2	0.00311672	-0.25492	0.995	0.994	1	TLM	HTNVvsHealth
SRPK21	0.439032	-0.256833	0.449	0.36	1	TLM	HTNVvsHealth
N4BP2L2	0.654718	-0.256917	0.528	0.479	1	TLM	HTNVvsHealth
XPA	0.767407	-0.257714	0.275	0.244	1	TLM	HTNVvsHealth
TOMM62	0.727952	-0.257755	0.375	0.308	1	TLM	HTNVvsHealth
ACTR32	0.96851	-0.258115	0.704	0.604	1	TLM	HTNVvsHealth
EIF3L2	0.0893574	-0.25856	0.863	0.793	1	TLM	HTNVvsHealth
RNASEH2B1	0.706051	-0.259237	0.454	0.378	1	TLM	HTNVvsHealth
ATP5PO2	0.839118	-0.259828	0.447	0.378	1	TLM	HTNVvsHealth
SPCS2	0.519506	-0.261239	0.613	0.485	1	TLM	HTNVvsHealth
ARHGAP251	0.786409	-0.262008	0.465	0.418	1	TLM	HTNVvsHealth
EEF1B22	0.00310998	-0.263749	0.998	0.988	1	TLM	HTNVvsHealth
TRPT1	0.539014	-0.264251	0.273	0.226	1	TLM	HTNVvsHealth
SLC9A3R11	0.690751	-0.264287	0.31	0.265	1	TLM	HTNVvsHealth
FCRL21	0.53009	-0.264626	0.625	0.546	1	TLM	HTNVvsHealth
FMNL11	0.382575	-0.264892	0.345	0.271	1	TLM	HTNVvsHealth
SOD12	0.650356	-0.265352	0.718	0.622	1	TLM	HTNVvsHealth
LUC7L3	0.342655	-0.265614	0.53	0.488	1	TLM	HTNVvsHealth
HMGN2	0.00186107	-0.266014	0.847	0.808	1	TLM	HTNVvsHealth
CMPK1	0.557762	-0.26632	0.488	0.393	1	TLM	HTNVvsHealth
MEAF62	0.767631	-0.26709	0.553	0.463	1	TLM	HTNVvsHealth
HERPUD2	0.772649	-0.269294	0.264	0.232	1	TLM	HTNVvsHealth
WTAP	0.528195	-0.270312	0.359	0.293	1	TLM	HTNVvsHealth
GPX41	0.576429	-0.270352	0.775	0.671	1	TLM	HTNVvsHealth
JAGN1	0.844263	-0.27057	0.255	0.226	1	TLM	HTNVvsHealth
ANKRD10	0.612131	-0.270648	0.373	0.317	1	TLM	HTNVvsHealth
SCNM1	0.820985	-0.271769	0.278	0.238	1	TLM	HTNVvsHealth
SNRNP200	0.350355	-0.272607	0.287	0.229	1	TLM	HTNVvsHealth
TRIM22	0.247819	-0.27293	0.475	0.46	1	TLM	HTNVvsHealth
CD742	7.64202e-08	-0.273213	1	1	0.00163165	TLM	HTNVvsHealth
FGD2	0.823492	-0.273806	0.394	0.357	1	TLM	HTNVvsHealth
LBH1	0.707323	-0.273835	0.572	0.518	1	TLM	HTNVvsHealth
SRSF11	0.403328	-0.275951	0.273	0.274	1	TLM	HTNVvsHealth
HMGN3	0.997218	-0.277842	0.6	0.509	1	TLM	HTNVvsHealth
DDX39B1	0.232573	-0.277956	0.41	0.308	1	TLM	HTNVvsHealth
MT-CO11	0.18114	-0.278067	0.477	0.439	1	TLM	HTNVvsHealth
MAP3K11	0.719065	-0.278547	0.289	0.247	1	TLM	HTNVvsHealth
RPS101	0.287758	-0.280813	0.394	0.39	1	TLM	HTNVvsHealth
TUBB2	0.60214	-0.28147	0.597	0.491	1	TLM	HTNVvsHealth
OCIAD1	0.470878	-0.281869	0.438	0.36	1	TLM	HTNVvsHealth
ERCC1	0.551504	-0.283014	0.322	0.262	1	TLM	HTNVvsHealth
PCMT11	0.787278	-0.283711	0.287	0.265	1	TLM	HTNVvsHealth
RBBP61	0.832098	-0.284421	0.488	0.409	1	TLM	HTNVvsHealth
PAX51	0.790683	-0.287624	0.354	0.308	1	TLM	HTNVvsHealth
B4GALT1	0.934017	-0.287835	0.431	0.387	1	TLM	HTNVvsHealth
PTPN62	0.0759162	-0.288144	0.817	0.784	1	TLM	HTNVvsHealth
OAZ12	0.0121074	-0.28852	0.975	0.966	1	TLM	HTNVvsHealth
REST	0.927531	-0.292049	0.259	0.232	1	TLM	HTNVvsHealth
TMED2	0.898353	-0.292084	0.417	0.363	1	TLM	HTNVvsHealth
PIK3AP1	0.829467	-0.292625	0.28	0.256	1	TLM	HTNVvsHealth
CAPZA12	0.86039	-0.292631	0.59	0.482	1	TLM	HTNVvsHealth
NBEAL1	0.304249	-0.294715	0.252	0.195	1	TLM	HTNVvsHealth
TTC14	0.956113	-0.29519	0.289	0.259	1	TLM	HTNVvsHealth
CALM22	0.0547144	-0.295676	0.845	0.787	1	TLM	HTNVvsHealth
GNB22	0.925769	-0.298393	0.544	0.491	1	TLM	HTNVvsHealth
COMMD3	0.360301	-0.299024	0.278	0.22	1	TLM	HTNVvsHealth
BACE2	0.655078	-0.299227	0.324	0.308	1	TLM	HTNVvsHealth
NPC21	0.422962	-0.301423	0.551	0.5	1	TLM	HTNVvsHealth
PLD4	0.0979196	-0.304495	0.426	0.442	1	TLM	HTNVvsHealth
ARHGAP171	0.556494	-0.307056	0.481	0.433	1	TLM	HTNVvsHealth
HLA-DQA22	0.265909	-0.307502	0.382	0.299	1	TLM	HTNVvsHealth
EVI2B2	0.134889	-0.307703	0.775	0.71	1	TLM	HTNVvsHealth
LINC023971	0.304521	-0.307879	0.317	0.317	1	TLM	HTNVvsHealth
GOLPH3	0.877802	-0.312061	0.275	0.247	1	TLM	HTNVvsHealth
SRP91	0.586903	-0.312216	0.6	0.53	1	TLM	HTNVvsHealth
ZFP36L22	0.684889	-0.312679	0.81	0.729	1	TLM	HTNVvsHealth
BORCS7	0.936004	-0.313433	0.252	0.226	1	TLM	HTNVvsHealth
TMEM165	0.73672	-0.313961	0.273	0.253	1	TLM	HTNVvsHealth
ADAM19	0.844512	-0.314807	0.252	0.223	1	TLM	HTNVvsHealth
TNFAIP82	0.0991653	-0.318516	0.551	0.54	1	TLM	HTNVvsHealth
RPL36A	0.16711	-0.3187	0.451	0.433	1	TLM	HTNVvsHealth
TMSB4X2	3.91636e-07	-0.319514	0.995	1	0.00836181	TLM	HTNVvsHealth
TXNL4A	0.258118	-0.321501	0.333	0.332	1	TLM	HTNVvsHealth
LNPEP	0.274728	-0.323815	0.266	0.268	1	TLM	HTNVvsHealth
IKZF12	0.700825	-0.324856	0.493	0.412	1	TLM	HTNVvsHealth
FCMR2	0.00200387	-0.327148	0.847	0.805	1	TLM	HTNVvsHealth
CDKN2D1	0.911018	-0.33062	0.442	0.384	1	TLM	HTNVvsHealth
BTN3A21	0.921028	-0.330664	0.333	0.302	1	TLM	HTNVvsHealth
ODC11	0.539697	-0.33338	0.505	0.451	1	TLM	HTNVvsHealth
TCF4	0.342586	-0.334247	0.553	0.5	1	TLM	HTNVvsHealth
IL161	0.110605	-0.336444	0.498	0.488	1	TLM	HTNVvsHealth
GAS52	0.618975	-0.336917	0.456	0.405	1	TLM	HTNVvsHealth
PAF1	0.26756	-0.337431	0.243	0.259	1	TLM	HTNVvsHealth
SCIMP1	0.515078	-0.338121	0.426	0.381	1	TLM	HTNVvsHealth
ATXN2L	1	-0.34037	0.25	0.226	1	TLM	HTNVvsHealth
DNAJC19	0.384158	-0.341059	0.329	0.317	1	TLM	HTNVvsHealth
PLEKHA21	0.766669	-0.341619	0.278	0.238	1	TLM	HTNVvsHealth
CYB5A1	0.311746	-0.342355	0.259	0.265	1	TLM	HTNVvsHealth
PFDN52	8.04733e-07	-0.343894	0.991	0.973	0.0171819	TLM	HTNVvsHealth
GPS2	0.576989	-0.344608	0.435	0.354	1	TLM	HTNVvsHealth
HLA-DRB52	3.85242e-07	-0.347592	0.903	0.96	0.00822529	TLM	HTNVvsHealth
R3HDM42	0.696202	-0.353039	0.444	0.372	1	TLM	HTNVvsHealth
STRBP	0.237056	-0.356971	0.266	0.274	1	TLM	HTNVvsHealth
RIC31	0.777119	-0.357939	0.373	0.332	1	TLM	HTNVvsHealth
SEMA4B	0.420313	-0.359113	0.287	0.287	1	TLM	HTNVvsHealth
TLR101	0.360739	-0.35926	0.354	0.338	1	TLM	HTNVvsHealth
GLIPR12	0.122874	-0.36147	0.373	0.384	1	TLM	HTNVvsHealth
JCHAIN	3.93176e-06	-0.366407	0.539	0.293	0.0839469	TLM	HTNVvsHealth
VOPP1	0.639226	-0.366673	0.583	0.5	1	TLM	HTNVvsHealth
PDCD21	0.942475	-0.369924	0.345	0.299	1	TLM	HTNVvsHealth
IKZF32	0.224105	-0.370353	0.465	0.436	1	TLM	HTNVvsHealth
FLI11	0.673562	-0.37127	0.396	0.351	1	TLM	HTNVvsHealth
ZNF7062	0.0353157	-0.372796	0.627	0.588	1	TLM	HTNVvsHealth
IRF2	0.866545	-0.373148	0.312	0.274	1	TLM	HTNVvsHealth
ETS11	0.365993	-0.3746	0.331	0.317	1	TLM	HTNVvsHealth
MAT2B2	0.100786	-0.37466	0.419	0.418	1	TLM	HTNVvsHealth
P2RY81	0.0852096	-0.378622	0.225	0.259	1	TLM	HTNVvsHealth
BTG2	0.12958	-0.37863	0.495	0.497	1	TLM	HTNVvsHealth
GLRX	0.426508	-0.380367	0.299	0.293	1	TLM	HTNVvsHealth
TAGAP	0.166806	-0.381214	0.435	0.427	1	TLM	HTNVvsHealth
RPS272	0.0168645	-0.382271	0.475	0.439	1	TLM	HTNVvsHealth
LSM61	0.193443	-0.382862	0.382	0.375	1	TLM	HTNVvsHealth
SRSF52	0.000238487	-0.384404	0.845	0.787	1	TLM	HTNVvsHealth
PDLIM2	0.664047	-0.384615	0.319	0.293	1	TLM	HTNVvsHealth
FCHSD2	0.329561	-0.38642	0.299	0.296	1	TLM	HTNVvsHealth
NIN	0.360257	-0.386538	0.269	0.265	1	TLM	HTNVvsHealth
MT-CYB2	0.0766996	-0.392605	0.477	0.439	1	TLM	HTNVvsHealth
QRSL12	0.149898	-0.392792	0.287	0.302	1	TLM	HTNVvsHealth
HLA-DPB12	8.24313e-11	-0.392978	0.993	1	1.75999e-06	TLM	HTNVvsHealth
MT-ND52	0.0947266	-0.397577	0.477	0.439	1	TLM	HTNVvsHealth
FKBP8	0.366619	-0.399106	0.574	0.506	1	TLM	HTNVvsHealth
AP1S21	0.729576	-0.399207	0.359	0.329	1	TLM	HTNVvsHealth
LSM101	0.617449	-0.399323	0.428	0.36	1	TLM	HTNVvsHealth
STUB11	0.0894977	-0.400303	0.356	0.363	1	TLM	HTNVvsHealth
CD180	0.28239	-0.40275	0.289	0.29	1	TLM	HTNVvsHealth
C1orf1621	0.0634447	-0.403458	0.241	0.277	1	TLM	HTNVvsHealth
ATM1	0.0779352	-0.403861	0.419	0.421	1	TLM	HTNVvsHealth
PABPN1	0.443992	-0.405977	0.361	0.326	1	TLM	HTNVvsHealth
FAM129C1	0.0135362	-0.406161	0.317	0.363	1	TLM	HTNVvsHealth
SPI12	0.149133	-0.409937	0.477	0.448	1	TLM	HTNVvsHealth
TLE52	0.759482	-0.409971	0.306	0.259	1	TLM	HTNVvsHealth
CD822	0.0124296	-0.410572	0.678	0.671	1	TLM	HTNVvsHealth
KRT102	0.0510137	-0.411636	0.59	0.555	1	TLM	HTNVvsHealth
ITGA42	0.574655	-0.411662	0.468	0.427	1	TLM	HTNVvsHealth
MT-ATP62	0.10539	-0.411727	0.472	0.436	1	TLM	HTNVvsHealth
PLEKHF22	0.24415	-0.414091	0.326	0.326	1	TLM	HTNVvsHealth
KHDRBS12	0.131368	-0.415556	0.502	0.476	1	TLM	HTNVvsHealth
HHEX2	0.211576	-0.421203	0.359	0.354	1	TLM	HTNVvsHealth
MPEG1	0.0376763	-0.422473	0.206	0.253	1	TLM	HTNVvsHealth
ARHGAP24	0.00852879	-0.423331	0.519	0.527	1	TLM	HTNVvsHealth
HSPA82	0.0019403	-0.423643	0.845	0.802	1	TLM	HTNVvsHealth
ADAM281	0.601555	-0.429937	0.463	0.421	1	TLM	HTNVvsHealth
SFPQ1	0.125391	-0.437239	0.419	0.415	1	TLM	HTNVvsHealth
PDCD42	0.202372	-0.437787	0.553	0.506	1	TLM	HTNVvsHealth
YBX12	0.000674904	-0.439072	0.87	0.845	1	TLM	HTNVvsHealth
MBD41	0.215085	-0.440685	0.461	0.436	1	TLM	HTNVvsHealth
MT-ND42	0.137517	-0.444756	0.47	0.439	1	TLM	HTNVvsHealth
KIAA00401	0.00536321	-0.446081	0.366	0.412	1	TLM	HTNVvsHealth
TGFBR21	0.392831	-0.446841	0.356	0.332	1	TLM	HTNVvsHealth
STX71	0.0385701	-0.447938	0.553	0.518	1	TLM	HTNVvsHealth
MYLIP	0.00905928	-0.451009	0.206	0.268	1	TLM	HTNVvsHealth
FTL2	7.66984e-14	-0.45431	0.998	1	1.63759e-09	TLM	HTNVvsHealth
MT-ND22	0.171308	-0.45534	0.475	0.436	1	TLM	HTNVvsHealth
TRBC22	0.0450567	-0.456042	0.581	0.546	1	TLM	HTNVvsHealth
HVCN12	0.0217434	-0.456103	0.523	0.527	1	TLM	HTNVvsHealth
ARF62	0.0833831	-0.466284	0.551	0.509	1	TLM	HTNVvsHealth
CALHM61	0.19566	-0.470378	0.38	0.363	1	TLM	HTNVvsHealth
2025-03-11	0.00514073	-0.474894	0.558	0.576	1	TLM	HTNVvsHealth
DYNLL11	0.0196139	-0.480548	0.505	0.5	1	TLM	HTNVvsHealth
RPS292	0.00652429	-0.487101	0.472	0.439	1	TLM	HTNVvsHealth
IMP32	0.00804137	-0.489844	0.41	0.433	1	TLM	HTNVvsHealth
TRAF3IP32	0.00345866	-0.494523	0.618	0.588	1	TLM	HTNVvsHealth
HNRNPF2	0.0157886	-0.497219	0.537	0.527	1	TLM	HTNVvsHealth
RPL212	0.0163116	-0.497686	0.47	0.439	1	TLM	HTNVvsHealth
CNBP2	9.64189e-07	-0.499726	0.859	0.814	0.0205864	TLM	HTNVvsHealth
CHCHD102	0.00101264	-0.502297	0.697	0.683	1	TLM	HTNVvsHealth
MT-ND6	0.0541298	-0.506193	0.391	0.402	1	TLM	HTNVvsHealth
RNF141	0.133299	-0.506909	0.391	0.381	1	TLM	HTNVvsHealth
CXXC51	8.01849e-05	-0.50864	0.581	0.616	1	TLM	HTNVvsHealth
ZFP36L12	8.44451e-05	-0.50975	0.729	0.735	1	TLM	HTNVvsHealth
PSMB8-AS12	0.0138353	-0.517963	0.338	0.378	1	TLM	HTNVvsHealth
MZT2B2	0.00407713	-0.521906	0.486	0.485	1	TLM	HTNVvsHealth
DCK2	0.00137082	-0.537911	0.338	0.409	1	TLM	HTNVvsHealth
CYBA2	1.32375e-10	-0.54914	0.933	0.948	2.82635e-06	TLM	HTNVvsHealth
CMTM71	0.0751531	-0.550775	0.273	0.29	1	TLM	HTNVvsHealth
LYSMD2	0.000422719	-0.553245	0.199	0.284	1	TLM	HTNVvsHealth
MMP24OS	0.0189093	-0.563633	0.213	0.253	1	TLM	HTNVvsHealth
SRSF92	2.50715e-05	-0.564734	0.407	0.476	0.535301	TLM	HTNVvsHealth
TNFRSF1B	0.52609	-0.577674	0.34	0.308	1	TLM	HTNVvsHealth
YPEL31	7.87537e-05	-0.586056	0.521	0.546	1	TLM	HTNVvsHealth
NIBAN31	0.124305	-0.587544	0.31	0.311	1	TLM	HTNVvsHealth
SUN2	0.00884509	-0.587827	0.271	0.32	1	TLM	HTNVvsHealth
SPIB2	0.000651137	-0.591562	0.711	0.689	1	TLM	HTNVvsHealth
TRIR2	8.35427e-08	-0.591646	0.708	0.738	0.00178372	TLM	HTNVvsHealth
CD242	0.0228684	-0.596742	0.41	0.436	1	TLM	HTNVvsHealth
GAPT1	0.00148887	-0.618713	0.296	0.363	1	TLM	HTNVvsHealth
MT-ATP82	0.0118115	-0.626544	0.477	0.439	1	TLM	HTNVvsHealth
KLF21	4.48717e-09	-0.640045	0.771	0.784	9.58055e-05	TLM	HTNVvsHealth
RPL411	0.000168443	-0.644181	0.475	0.439	1	TLM	HTNVvsHealth
LTB2	1.15183e-10	-0.649122	0.785	0.857	2.45927e-06	TLM	HTNVvsHealth
MT-ND11	0.00467847	-0.66739	0.477	0.439	1	TLM	HTNVvsHealth
TPT12	7.5958e-27	-0.669254	0.998	1	1.62178e-22	TLM	HTNVvsHealth
MT-ND32	0.00381961	-0.670365	0.477	0.439	1	TLM	HTNVvsHealth
PNRC12	2.22278e-11	-0.678203	0.762	0.814	4.74586e-07	TLM	HTNVvsHealth
S1PR41	1.61e-05	-0.682986	0.271	0.381	0.343751	TLM	HTNVvsHealth
NOP532	1.11847e-12	-0.701912	0.875	0.872	2.38804e-08	TLM	HTNVvsHealth
RPS261	0.00883647	-0.84421	0.475	0.433	1	TLM	HTNVvsHealth
MT2A	0.000605796	-1.44216	0.343	0.201	1	TLM	HTNVvsHealth
MT-CO22	4.53347e-23	3.23331	0.778	0.087	9.67942e-19	ASM	HTNVvsHealth
MT-ND4L2	3.44262e-23	3.07794	0.779	0.087	7.35033e-19	ASM	HTNVvsHealth
MT-CO32	1.48625e-22	2.98381	0.779	0.087	3.17329e-18	ASM	HTNVvsHealth
MT-CYB3	4.07534e-22	2.83202	0.778	0.087	8.70126e-18	ASM	HTNVvsHealth
MT-CO12	6.07778e-22	2.80827	0.78	0.087	1.29767e-17	ASM	HTNVvsHealth
MT-ND33	6.08831e-22	2.68548	0.778	0.087	1.29992e-17	ASM	HTNVvsHealth
MT-ATP63	2.14788e-22	2.66075	0.778	0.087	4.58593e-18	ASM	HTNVvsHealth
IGLV1-40	6.12534e-07	2.62909	0.302	0.014	0.0130782	ASM	HTNVvsHealth
MT-ND53	3.34449e-22	2.54825	0.777	0.087	7.14082e-18	ASM	HTNVvsHealth
IGLL5	7.64911e-14	2.49545	0.594	0.087	1.63316e-09	ASM	HTNVvsHealth
MT-ATP83	1.88848e-21	2.46691	0.777	0.087	4.03209e-17	ASM	HTNVvsHealth
RPLP12	7.93832e-22	2.4662	0.774	0.087	1.69491e-17	ASM	HTNVvsHealth
RPS262	4.70891e-21	2.4583	0.726	0.072	1.0054e-16	ASM	HTNVvsHealth
RPS192	8.53223e-22	2.45497	0.762	0.087	1.82172e-17	ASM	HTNVvsHealth
RPL283	2.63649e-21	2.3788	0.754	0.087	5.62917e-17	ASM	HTNVvsHealth
RPS282	1.53101e-20	2.3517	0.747	0.087	3.26887e-16	ASM	HTNVvsHealth
MT-ND12	6.15134e-22	2.34459	0.777	0.087	1.31337e-17	ASM	HTNVvsHealth
RPS82	1.66709e-21	2.33637	0.759	0.087	3.5594e-17	ASM	HTNVvsHealth
RPL7A3	3.19632e-21	2.32427	0.758	0.087	6.82446e-17	ASM	HTNVvsHealth
RPN2	3.59401e-24	2.28903	0.772	0.087	7.67357e-20	ASM	HTNVvsHealth
RPL192	1.08219e-20	2.28096	0.743	0.072	2.31059e-16	ASM	HTNVvsHealth
RPLP03	1.62886e-21	2.28054	0.763	0.087	3.47779e-17	ASM	HTNVvsHealth
RPS242	1.7244e-20	2.27902	0.739	0.087	3.68177e-16	ASM	HTNVvsHealth
RPLP22	8.70785e-20	2.2724	0.722	0.087	1.85921e-15	ASM	HTNVvsHealth
RPL132	3.12368e-21	2.25592	0.761	0.087	6.66938e-17	ASM	HTNVvsHealth
IGHG11	3.19132e-09	2.22553	0.743	0.493	6.81378e-05	ASM	HTNVvsHealth
RPL102	1.19805e-21	2.18628	0.772	0.087	2.55795e-17	ASM	HTNVvsHealth
RPS132	3.13288e-20	2.18371	0.742	0.087	6.68902e-16	ASM	HTNVvsHealth
RPS122	7.0801e-20	2.17309	0.728	0.072	1.51167e-15	ASM	HTNVvsHealth
RPL82	2.15317e-21	2.17025	0.754	0.072	4.59723e-17	ASM	HTNVvsHealth
RPS33	2.18209e-20	2.15588	0.744	0.087	4.65898e-16	ASM	HTNVvsHealth
RPL112	9.08933e-22	2.14975	0.771	0.087	1.94066e-17	ASM	HTNVvsHealth
RPS182	2.43467e-21	2.12708	0.763	0.087	5.19826e-17	ASM	HTNVvsHealth
MT-ND23	3.00605e-22	2.12188	0.772	0.087	6.41821e-18	ASM	HTNVvsHealth
RPS210	5.09178e-21	2.11908	0.766	0.087	1.08715e-16	ASM	HTNVvsHealth
MT-ND43	1.00493e-21	2.11333	0.775	0.087	2.14562e-17	ASM	HTNVvsHealth
RPL182	2.78568e-21	2.10047	0.756	0.087	5.9477e-17	ASM	HTNVvsHealth
RPS52	2.98656e-20	2.09329	0.729	0.072	6.3766e-16	ASM	HTNVvsHealth
IGLC22	9.19382e-06	2.08857	0.476	0.203	0.196297	ASM	HTNVvsHealth
RPS62	6.29519e-20	2.0855	0.732	0.087	1.34409e-15	ASM	HTNVvsHealth
RPL352	2.63088e-19	2.08188	0.701	0.072	5.61718e-15	ASM	HTNVvsHealth
RPL292	4.75788e-20	2.07434	0.725	0.072	1.01586e-15	ASM	HTNVvsHealth
RPS27A2	4.38455e-20	2.07075	0.744	0.087	9.36145e-16	ASM	HTNVvsHealth
RPL372	2.32781e-19	2.04411	0.726	0.087	4.9701e-15	ASM	HTNVvsHealth
RPL302	3.24375e-20	2.04291	0.743	0.087	6.92573e-16	ASM	HTNVvsHealth
RPL18A2	2.93372e-20	2.0405	0.74	0.087	6.26379e-16	ASM	HTNVvsHealth
RPL322	8.12064e-19	2.0357	0.705	0.087	1.73384e-14	ASM	HTNVvsHealth
ATP5E2	3.15035e-17	2.03315	0.629	0.043	6.72632e-13	ASM	HTNVvsHealth
RPS152	5.1128e-21	2.02708	0.755	0.072	1.09163e-16	ASM	HTNVvsHealth
RPL122	3.27973e-18	2.02468	0.682	0.072	7.00254e-14	ASM	HTNVvsHealth
RPS232	1.82132e-19	2.02305	0.722	0.072	3.8887e-15	ASM	HTNVvsHealth
RPS212	6.3481e-21	2.02036	0.757	0.087	1.35538e-16	ASM	HTNVvsHealth
RPL152	5.79983e-21	2.01123	0.733	0.058	1.23832e-16	ASM	HTNVvsHealth
RPS162	4.56471e-20	2.00769	0.729	0.072	9.74612e-16	ASM	HTNVvsHealth
RPL23A2	4.79663e-19	1.99909	0.705	0.072	1.02413e-14	ASM	HTNVvsHealth
RPS72	7.54415e-21	1.98238	0.755	0.087	1.61075e-16	ASM	HTNVvsHealth
RPS142	3.38041e-19	1.97084	0.716	0.087	7.21751e-15	ASM	HTNVvsHealth
RPL62	1.85026e-19	1.96901	0.705	0.058	3.9505e-15	ASM	HTNVvsHealth
RPL310	3.12327e-21	1.94728	0.762	0.087	6.66848e-17	ASM	HTNVvsHealth
RPS4X2	4.44182e-21	1.94458	0.751	0.087	9.48374e-17	ASM	HTNVvsHealth
RPS273	1.53087e-20	1.94097	0.743	0.087	3.26855e-16	ASM	HTNVvsHealth
RPL363	8.19258e-18	1.93831	0.683	0.072	1.7492e-13	ASM	HTNVvsHealth
RPL52	2.97757e-18	1.93567	0.695	0.072	6.3574e-14	ASM	HTNVvsHealth
RPL342	5.60808e-20	1.92659	0.728	0.087	1.19738e-15	ASM	HTNVvsHealth
RPL37A2	3.97512e-19	1.92378	0.727	0.087	8.48728e-15	ASM	HTNVvsHealth
RPS3A2	4.42157e-19	1.90515	0.712	0.072	9.44049e-15	ASM	HTNVvsHealth
RPL35A2	1.46837e-18	1.89984	0.697	0.072	3.13512e-14	ASM	HTNVvsHealth
RPL143	1.13203e-19	1.89543	0.723	0.072	2.41699e-15	ASM	HTNVvsHealth
RPS92	2.11973e-20	1.8953	0.74	0.072	4.52583e-16	ASM	HTNVvsHealth
RPN1	6.59763e-23	1.89479	0.767	0.087	1.40866e-18	ASM	HTNVvsHealth
RPS252	2.16105e-18	1.88731	0.692	0.072	4.61405e-14	ASM	HTNVvsHealth
MT-ND61	3.03621e-21	1.85469	0.759	0.087	6.48261e-17	ASM	HTNVvsHealth
RPL262	1.88648e-18	1.84784	0.695	0.072	4.02782e-14	ASM	HTNVvsHealth
IGLC31	0.00069479	1.8321	0.361	0.159	1	ASM	HTNVvsHealth
RPSA2	1.46198e-19	1.81443	0.709	0.058	3.12147e-15	ASM	HTNVvsHealth
RPL392	4.80668e-18	1.80366	0.694	0.087	1.02627e-13	ASM	HTNVvsHealth
RPL272	1.01896e-16	1.7737	0.65	0.072	2.17558e-12	ASM	HTNVvsHealth
RPL10A2	2.20173e-18	1.76877	0.702	0.087	4.70091e-14	ASM	HTNVvsHealth
RPL36AL3	1.10311e-18	1.7642	0.67	0.043	2.35525e-14	ASM	HTNVvsHealth
IGHM1	3.43894e-06	1.76091	0.453	0.13	0.0734248	ASM	HTNVvsHealth
RPL172	2.65258e-19	1.72112	0.702	0.058	5.66353e-15	ASM	HTNVvsHealth
RPS15A2	9.04368e-21	1.65476	0.757	0.087	1.93092e-16	ASM	HTNVvsHealth
RPL73	2.39108e-16	1.58159	0.629	0.058	5.10519e-12	ASM	HTNVvsHealth
RPS293	8.0302e-18	1.58006	0.676	0.058	1.71453e-13	ASM	HTNVvsHealth
RPL242	3.44762e-17	1.57713	0.655	0.058	7.36101e-13	ASM	HTNVvsHealth
RPL42	3.02514e-19	1.57578	0.719	0.072	6.45898e-15	ASM	HTNVvsHealth
RPL222	1.61496e-16	1.55854	0.646	0.058	3.4481e-12	ASM	HTNVvsHealth
RPL92	4.67463e-16	1.53455	0.649	0.087	9.98081e-12	ASM	HTNVvsHealth
RPL213	1.1736e-17	1.52024	0.678	0.072	2.50576e-13	ASM	HTNVvsHealth
RPL13A2	3.75256e-17	1.51121	0.672	0.072	8.0121e-13	ASM	HTNVvsHealth
RPL412	6.17339e-19	1.47864	0.726	0.087	1.31808e-14	ASM	HTNVvsHealth
ATP5A11	2.82423e-21	1.46085	0.699	0.058	6.03e-17	ASM	HTNVvsHealth
RPS112	8.77515e-17	1.45184	0.656	0.072	1.87358e-12	ASM	HTNVvsHealth
RPL22L13	1.66625e-15	1.44135	0.584	0.058	3.5576e-11	ASM	HTNVvsHealth
ATP5G33	4.55101e-17	1.42482	0.643	0.058	9.71686e-13	ASM	HTNVvsHealth
RPL382	3.51692e-14	1.38523	0.569	0.043	7.50898e-10	ASM	HTNVvsHealth
RPL312	3.86192e-15	1.36638	0.602	0.058	8.24558e-11	ASM	HTNVvsHealth
HIST1H4C3	5.48725e-08	1.33583	0.681	0.304	0.00117158	ASM	HTNVvsHealth
ATP5G22	3.73479e-15	1.29126	0.631	0.087	7.97415e-11	ASM	HTNVvsHealth
ATP5B2	1.677e-18	1.2805	0.687	0.058	3.58056e-14	ASM	HTNVvsHealth
RPL27A3	2.71502e-14	1.27388	0.607	0.072	5.79684e-10	ASM	HTNVvsHealth
IGKV1-39	0.0432386	1.2598	0.176	0.275	1	ASM	HTNVvsHealth
RPS173	6.66229e-15	1.2364	0.594	0.043	1.42247e-10	ASM	HTNVvsHealth
ATP5L2	8.09893e-17	1.2259	0.663	0.072	1.7292e-12	ASM	HTNVvsHealth
RRBP1	1.61566e-17	1.20623	0.967	0.507	3.4496e-13	ASM	HTNVvsHealth
ATP5J22	5.60388e-16	1.19599	0.619	0.072	1.19648e-11	ASM	HTNVvsHealth
ATP5J1	2.07986e-15	1.18072	0.591	0.043	4.4407e-11	ASM	HTNVvsHealth
HSPA53	1.41819e-11	1.15872	0.995	0.812	3.02798e-07	ASM	HTNVvsHealth
ATP5D2	1.31191e-15	1.08604	0.627	0.072	2.80106e-11	ASM	HTNVvsHealth
IFI27	1.83423e-09	1.05575	0.364	0	3.91627e-05	ASM	HTNVvsHealth
IGKV3-201	2.35223e-05	1.04134	0.38	0.101	0.502224	ASM	HTNVvsHealth
ATPIF13	3.58947e-16	1.03983	0.589	0.029	7.66388e-12	ASM	HTNVvsHealth
C14orf22	2.571e-14	1.0282	0.566	0.043	5.48933e-10	ASM	HTNVvsHealth
FKBP2	3.25447e-18	1.02485	0.961	0.464	6.94861e-14	ASM	HTNVvsHealth
RPS27L	4.40117e-15	1.02101	0.569	0.043	9.39693e-11	ASM	HTNVvsHealth
RPL232	2.69357e-13	1.02023	0.542	0.043	5.75104e-09	ASM	HTNVvsHealth
USMG52	1.96536e-11	1.01422	0.511	0.072	4.19625e-07	ASM	HTNVvsHealth
IGLV3-1	1.40982e-08	1.01143	0.497	0.101	0.00030101	ASM	HTNVvsHealth
ATP5G1	4.86461e-16	0.967391	0.573	0.014	1.03864e-11	ASM	HTNVvsHealth
FAM46C	2.73069e-17	0.944698	0.692	0.087	5.8303e-13	ASM	HTNVvsHealth
ATP5I1	1.5008e-12	0.930374	0.544	0.058	3.20435e-08	ASM	HTNVvsHealth
RPS4Y12	1.41368e-14	0.919066	0.572	0.043	3.01834e-10	ASM	HTNVvsHealth
SEC621	1.99072e-17	0.905409	0.969	0.522	4.25039e-13	ASM	HTNVvsHealth
RPL36A1	6.67029e-13	0.850605	0.554	0.058	1.42417e-08	ASM	HTNVvsHealth
HSP90B11	4.65691e-09	0.843203	1	1	9.94296e-05	ASM	HTNVvsHealth
ATP5F1	2.05464e-14	0.813354	0.596	0.058	4.38687e-10	ASM	HTNVvsHealth
ATP5C1	2.67693e-13	0.813156	0.558	0.058	5.71552e-09	ASM	HTNVvsHealth
PET1003	2.00531e-16	0.809021	0.865	0.275	4.28153e-12	ASM	HTNVvsHealth
HIST1H2AJ	3.35541e-06	0.797326	0.284	0.029	0.0716413	ASM	HTNVvsHealth
MINOS1	3.31014e-13	0.796776	0.536	0.058	7.06748e-09	ASM	HTNVvsHealth
MZB13	6.96236e-15	0.783392	1	0.913	1.48653e-10	ASM	HTNVvsHealth
RPS202	8.46925e-11	0.76768	0.479	0.043	1.80827e-06	ASM	HTNVvsHealth
C20orf24	6.32061e-15	0.754773	0.613	0.058	1.34951e-10	ASM	HTNVvsHealth
IGLV1-44	9.4246e-05	0.752007	0.264	0.043	1	ASM	HTNVvsHealth
IGHA1	0.269299	0.738852	0.743	0.536	1	ASM	HTNVvsHealth
RPS102	3.14239e-11	0.707146	0.508	0.058	6.70931e-07	ASM	HTNVvsHealth
LMAN1	1.9688e-10	0.678603	0.989	0.754	4.20357e-06	ASM	HTNVvsHealth
LILRB4	1.34068e-09	0.674255	0.661	0.217	2.8625e-05	ASM	HTNVvsHealth
C8orf59	3.62811e-11	0.673741	0.482	0.043	7.74637e-07	ASM	HTNVvsHealth
CD320	7.06901e-10	0.668759	0.825	0.362	1.5093e-05	ASM	HTNVvsHealth
2025-09-02	1.64133e-14	0.667632	0.588	0.072	3.5044e-10	ASM	HTNVvsHealth
IGHG2	0.744265	0.660227	0.273	0.232	1	ASM	HTNVvsHealth
CCNL11	2.1626e-12	0.650932	0.843	0.319	4.61738e-08	ASM	HTNVvsHealth
IGKC2	0.229101	0.64867	0.668	0.754	1	ASM	HTNVvsHealth
ATP5H1	1.20416e-10	0.645443	0.484	0.058	2.57099e-06	ASM	HTNVvsHealth
RHOB2	4.00082e-05	0.640982	0.549	0.246	0.854214	ASM	HTNVvsHealth
LY6E3	1.13851e-07	0.626438	0.909	0.565	0.00243084	ASM	HTNVvsHealth
IFI6	9.69002e-14	0.625217	0.827	0.304	2.06892e-09	ASM	HTNVvsHealth
ERP44	1.59469e-12	0.610077	0.882	0.406	3.40483e-08	ASM	HTNVvsHealth
FAM96B	3.8319e-11	0.608274	0.5	0.058	8.18148e-07	ASM	HTNVvsHealth
1962-09-01	2.42026e-12	0.600703	0.52	0.058	5.1675e-08	ASM	HTNVvsHealth
RPS19BP1	9.20948e-12	0.599994	0.495	0.043	1.96632e-07	ASM	HTNVvsHealth
C19orf24	9.93307e-12	0.588021	0.525	0.072	2.12081e-07	ASM	HTNVvsHealth
CPEB4	6.13135e-12	0.580717	0.569	0.087	1.3091e-07	ASM	HTNVvsHealth
C19orf70	1.17693e-12	0.578918	0.5	0.029	2.51287e-08	ASM	HTNVvsHealth
SDC1	2.81631e-07	0.558007	0.483	0.13	0.00601311	ASM	HTNVvsHealth
1973-09-01	4.23493e-11	0.547273	0.51	0.072	9.042e-07	ASM	HTNVvsHealth
GGH	8.9062e-08	0.542429	0.761	0.362	0.00190156	ASM	HTNVvsHealth
TCIRG12	6.03101e-13	0.540705	0.781	0.261	1.28768e-08	ASM	HTNVvsHealth
EMC7	4.18155e-09	0.537878	0.881	0.377	8.92802e-05	ASM	HTNVvsHealth
SEL1L	1.75551e-07	0.533861	0.84	0.42	0.0037482	ASM	HTNVvsHealth
GAS6	1.73234e-11	0.521358	0.586	0.101	3.69872e-07	ASM	HTNVvsHealth
MAGED1	8.77518e-11	0.495959	0.666	0.188	1.87359e-06	ASM	HTNVvsHealth
IGLV2-142	3.51433e-06	0.483771	0.327	0.043	0.0750346	ASM	HTNVvsHealth
SLC38A5	1.63368e-06	0.483314	0.727	0.391	0.0348808	ASM	HTNVvsHealth
TMED101	9.21052e-06	0.48175	0.984	0.783	0.196654	ASM	HTNVvsHealth
NDUFA33	5.0622e-07	0.475627	0.86	0.493	0.0108083	ASM	HTNVvsHealth
FAM173A	4.15403e-11	0.468991	0.476	0.043	8.86928e-07	ASM	HTNVvsHealth
MALAT11	0.000609841	0.463576	0.999	1	1	ASM	HTNVvsHealth
SPCS3	8.12829e-07	0.452379	0.985	0.768	0.0173547	ASM	HTNVvsHealth
RPA3	1.2712e-07	0.450312	0.34	0.029	0.00271413	ASM	HTNVvsHealth
C17orf62	1.11366e-09	0.443331	0.503	0.087	2.37777e-05	ASM	HTNVvsHealth
1991-09-01	4.56147e-08	0.441869	0.392	0.058	0.00097392	ASM	HTNVvsHealth
ROMO12	0.000337942	0.435127	0.766	0.507	1	ASM	HTNVvsHealth
FAM96A2	2.35157e-09	0.434435	0.399	0.029	5.02083e-05	ASM	HTNVvsHealth
FKBP11	2.09999e-05	0.433851	0.99	0.797	0.448369	ASM	HTNVvsHealth
NEAT13	2.53332e-05	0.433337	0.936	0.623	0.540888	ASM	HTNVvsHealth
CXCR3	4.19847e-07	0.425766	0.583	0.203	0.00896416	ASM	HTNVvsHealth
PECAM1	1.29531e-08	0.423823	0.513	0.101	0.000276561	ASM	HTNVvsHealth
TOR3A1	5.08281e-06	0.420562	0.855	0.522	0.108523	ASM	HTNVvsHealth
CHID1	6.27383e-09	0.416868	0.779	0.319	0.000133953	ASM	HTNVvsHealth
PRDX4	9.44191e-06	0.41181	0.964	0.623	0.201594	ASM	HTNVvsHealth
CALU	2.4836e-08	0.411598	0.848	0.377	0.000530274	ASM	HTNVvsHealth
C1GALT1C1	1.56599e-08	0.410883	0.66	0.217	0.000334354	ASM	HTNVvsHealth
RPS6KB2	6.59279e-09	0.405465	0.413	0.043	0.000140763	ASM	HTNVvsHealth
DPM3	1.03748e-06	0.403573	0.723	0.333	0.0221513	ASM	HTNVvsHealth
IFI27L1	1.16477e-07	0.403176	0.762	0.333	0.0024869	ASM	HTNVvsHealth
MAGED2	4.96905e-09	0.401758	0.56	0.145	0.000106094	ASM	HTNVvsHealth
ZMPSTE24	4.29653e-08	0.401104	0.505	0.13	0.000917351	ASM	HTNVvsHealth
DNAJC3	1.82974e-07	0.397705	0.906	0.507	0.00390667	ASM	HTNVvsHealth
BTG21	2.26247e-06	0.389884	0.764	0.377	0.048306	ASM	HTNVvsHealth
SLC7A5	4.19304e-07	0.389494	0.437	0.101	0.00895255	ASM	HTNVvsHealth
SAMSN1	1.75073e-08	0.387975	0.424	0.058	0.000373799	ASM	HTNVvsHealth
KIAA15511	2.20138e-08	0.38222	0.418	0.058	0.000470017	ASM	HTNVvsHealth
FCRL51	1.01564e-08	0.381991	0.608	0.174	0.00021685	ASM	HTNVvsHealth
PTCH2	2.04875e-05	0.380765	0.3	0.058	0.437428	ASM	HTNVvsHealth
GADD45B3	1.44366e-07	0.380409	0.433	0.087	0.00308236	ASM	HTNVvsHealth
SPAG4	2.13499e-07	0.379126	0.316	0.014	0.00455841	ASM	HTNVvsHealth
IL6ST	6.94368e-08	0.375536	0.524	0.13	0.00148255	ASM	HTNVvsHealth
FEN1	2.20897e-06	0.374399	0.371	0.072	0.0471636	ASM	HTNVvsHealth
PIGK	8.16931e-09	0.373807	0.563	0.13	0.000174423	ASM	HTNVvsHealth
ASPM	0.000160315	0.372211	0.265	0.058	1	ASM	HTNVvsHealth
HIST1H2AG	0.000790266	0.3693	0.262	0.072	1	ASM	HTNVvsHealth
CCR2	9.6562e-07	0.365932	0.359	0.058	0.020617	ASM	HTNVvsHealth
SSSCA1	5.41556e-08	0.362934	0.363	0.029	0.00115628	ASM	HTNVvsHealth
PDE4B1	2.31187e-06	0.360361	0.635	0.246	0.0493607	ASM	HTNVvsHealth
SLC3A2	7.04545e-05	0.359914	0.694	0.362	1	ASM	HTNVvsHealth
RARRES3	5.75474e-07	0.35643	0.329	0.029	0.0122869	ASM	HTNVvsHealth
B4GALT11	4.01778e-06	0.352611	0.532	0.188	0.0857835	ASM	HTNVvsHealth
RTFDC1	9.28509e-09	0.348224	0.383	0.029	0.000198246	ASM	HTNVvsHealth
SDF4	3.18236e-05	0.346723	0.92	0.565	0.679466	ASM	HTNVvsHealth
NDUFB1	0.000187306	0.34278	0.605	0.319	1	ASM	HTNVvsHealth
AKAP2	1.21214e-07	0.342562	0.396	0.058	0.00258804	ASM	HTNVvsHealth
LRPAP1	9.63429e-06	0.341476	0.948	0.609	0.205702	ASM	HTNVvsHealth
IGKV3OR2-268	1.74606e-07	0.341384	0.321	0.014	0.00372801	ASM	HTNVvsHealth
HYOU1	0.00025947	0.339919	0.779	0.449	1	ASM	HTNVvsHealth
KTN12	6.6515e-06	0.338696	0.77	0.391	0.142016	ASM	HTNVvsHealth
BUB1	3.12068e-06	0.337985	0.39	0.087	0.0666297	ASM	HTNVvsHealth
SIL1	1.63696e-06	0.337444	0.825	0.391	0.0349507	ASM	HTNVvsHealth
SEL1L3	6.4561e-05	0.336616	0.9	0.551	1	ASM	HTNVvsHealth
CLPTM1L	7.60616e-08	0.333974	0.684	0.246	0.00162399	ASM	HTNVvsHealth
SLC2A5	8.15464e-07	0.332043	0.441	0.101	0.017411	ASM	HTNVvsHealth
F2R	6.62833e-08	0.329854	0.336	0.014	0.00141522	ASM	HTNVvsHealth
DUSP5	0.000437982	0.329689	0.442	0.188	1	ASM	HTNVvsHealth
KCNN3	5.55553e-08	0.328477	0.364	0.029	0.00118616	ASM	HTNVvsHealth
ASNA1	1.71921e-08	0.327859	0.359	0.014	0.000367069	ASM	HTNVvsHealth
SKIV2L2	3.94318e-08	0.327577	0.359	0.029	0.000841908	ASM	HTNVvsHealth
2025-09-01	9.28963e-08	0.327201	0.449	0.087	0.00198343	ASM	HTNVvsHealth
SEC14L1	4.07249e-06	0.326455	0.865	0.493	0.0869518	ASM	HTNVvsHealth
NEU1	1.17418e-05	0.323496	0.725	0.348	0.250698	ASM	HTNVvsHealth
C19orf66	2.30397e-08	0.322021	0.351	0.014	0.000491921	ASM	HTNVvsHealth
AES2	1.20192e-06	0.320131	0.372	0.058	0.0256622	ASM	HTNVvsHealth
MYDGF	0.000131018	0.319723	0.995	0.855	1	ASM	HTNVvsHealth
APOL6	9.14868e-07	0.316175	0.409	0.087	0.0195333	ASM	HTNVvsHealth
RNF213	2.93161e-05	0.314644	0.842	0.507	0.625928	ASM	HTNVvsHealth
MBTPS1	1.71926e-07	0.313893	0.591	0.188	0.00367078	ASM	HTNVvsHealth
FAM69A	3.44603e-08	0.313197	0.375	0.029	0.000735761	ASM	HTNVvsHealth
SRPRA1	2.78736e-05	0.31204	0.943	0.594	0.59513	ASM	HTNVvsHealth
[truncated: 7,952 more rows]
