# Supplementary material for: Glycosylated IgG antibodies contribute to the recovery of haemorrhagic fever with renal syndrome patients
Source: bioRxiv preprint, doi:10.1101/2025.04.11.648365, version 6 (2025-12-04)
Supplement: Supplementary file 10 [file 648365_file18.xlsx]

## Sheet: sheet 1
Supplementary file 10. Differential expression genes in the ASM, PB and RM B cell subpopulations
gene_name	p_val	avg_log2FC	pct.1	pct.2	p_val_adj
SNHG29	5.63217e-60	-2.38138	0.18	0.778	1.20252e-55
ATP5MG	3.0049e-51	-2.18211	0.201	0.778	6.41576e-47
GAS5	1.32063e-50	-1.63045	0.105	0.576	2.81968e-46
ATP5MC2	1.78675e-50	-2.13348	0.195	0.768	3.81489e-46
EEF1A1	4.60996e-49	-2.09498	0.987	1	9.84273e-45
ATP5F1B	6.06781e-46	-1.72002	0.189	0.747	1.29554e-41
TP63	1.56873e-45	-0.37924	0.007	0.182	3.3494e-41
TLE5	1.47193e-44	-1.61102	0.102	0.535	3.14272e-40
SEPTIN6	7.10882e-41	-1.45849	0.143	0.596	1.5178e-36
PLAAT4	7.79209e-41	-1.6926	0.115	0.545	1.66369e-36
NACA	1.06331e-39	-1.53708	0.905	0.99	2.27028e-35
TPT1	2.48058e-39	-1.7632	0.958	1	5.29629e-35
ATP5MC3	2.66016e-38	-1.72469	0.196	0.707	5.6797e-34
ATP5PO	7.56321e-38	-1.52366	0.188	0.677	1.61482e-33
ATP5F1A	7.1425e-37	-1.67983	0.192	0.677	1.525e-32
EEF1B2	9.90568e-36	-1.48542	0.94	0.949	2.11496e-31
RACK1	1.3501e-35	-1.67537	0.917	0.96	2.8826e-31
EEF2	3.9196e-35	-1.66808	0.954	0.939	8.36873e-31
ATP5F1D	9.5653e-35	-1.52006	0.197	0.667	2.04229e-30
ATP5F1E	1.68415e-33	-1.19964	0.2	0.768	3.59583e-29
ATP5PB	2.19797e-33	-1.44158	0.176	0.616	4.69288e-29
RPN2	1.29136e-32	2.27284	0.753	0.081	2.75718e-28
CD74	1.93817e-32	-1.43505	0.994	1	4.13818e-28
ZFAS1	5.26945e-32	-1.32537	0.105	0.465	1.12508e-27
RPN1	6.93459e-32	1.91644	0.751	0.081	1.4806e-27
ATP5F1C	2.17248e-31	-1.32696	0.187	0.636	4.63846e-27
EEF1G	5.63959e-30	-1.45565	0.907	0.939	1.20411e-25
FAU	7.30797e-30	-1.1902	0.962	0.99	1.56033e-25
MT-ND6	8.28564e-30	1.89837	0.753	0.091	1.76907e-25
PCED1B-AS1	9.77507e-30	-1.4725	0.121	0.485	2.08708e-25
TOMM6	2.14046e-29	-1.16983	0.166	0.576	4.57011e-25
ATP5PF	2.38286e-29	-1.31048	0.193	0.667	5.08764e-25
MT-ND3	3.65241e-29	2.31958	0.789	0.131	7.79826e-25
MT-CO2	5.75422e-29	2.59315	0.788	0.131	1.22858e-24
PALM2-AKAP2	2.69627e-28	-1.02094	0.135	0.505	5.75681e-24
PLAAT2	3.44317e-28	-1.17758	0.08	0.394	7.35151e-24
MT-ND5	4.0603e-28	2.16462	0.787	0.131	8.66914e-24
MT-ATP6	6.4735e-28	2.14126	0.788	0.121	1.38216e-23
FKBP2	1.15372e-27	1.16406	0.92	0.404	2.4633e-23
MT-CO3	1.38101e-27	2.30567	0.789	0.131	2.94859e-23
BTF3	1.67292e-27	-1.61878	0.806	0.889	3.57185e-23
MT-ND4L	2.1001e-27	2.23434	0.789	0.131	4.48392e-23
MT-CO1	3.33754e-27	2.29565	0.789	0.131	7.12598e-23
FTH1	4.24586e-27	-1.61475	0.928	0.97	9.06534e-23
RPS21	4.34637e-27	1.54228	0.768	0.111	9.27994e-23
ATP5A1	7.40996e-27	1.20528	0.7	0.071	1.5821e-22
MT-ATP8	8.23349e-27	2.13637	0.787	0.131	1.75793e-22
MT-CYB	1.06702e-26	2.07224	0.788	0.131	2.27819e-22
RPS26	2.17959e-26	2.01019	0.735	0.101	4.65364e-22
SNHG3	2.27095e-26	-1.13153	0.097	0.414	4.84872e-22
OAZ1	2.32154e-26	-1.36889	0.875	0.889	4.95672e-22
MT-ND1	3.00346e-26	1.85579	0.786	0.131	6.41268e-22
RPS7	7.16033e-26	1.51607	0.769	0.121	1.5288e-21
RPL28	7.24276e-26	1.88449	0.765	0.131	1.5464e-21
RPL8	7.2692e-26	1.58121	0.766	0.111	1.55205e-21
RPS19	8.46611e-26	1.68745	0.773	0.131	1.8076e-21
EIF1	1.81617e-25	-1.25498	0.958	0.96	3.8777e-21
RPLP0	2.71745e-25	1.61938	0.768	0.131	5.80202e-21
ATP5MC1	2.81487e-25	-1.06065	0.183	0.596	6.01002e-21
SLC25A6	3.41846e-25	-1.41378	0.846	0.889	7.29876e-21
RPLP1	3.79498e-25	1.43081	0.784	0.131	8.10266e-21
TMSB10	6.35074e-25	-1.49753	0.961	0.99	1.35595e-20
RPS8	7.09515e-25	1.36072	0.771	0.121	1.51488e-20
ATP5IF1	7.16677e-25	-1.11203	0.182	0.586	1.53018e-20
MT-ND2	7.56781e-25	0.967988	0.78	0.131	1.6158e-20
RPL11	1.03549e-24	1.16795	0.779	0.131	2.21087e-20
RPL3	1.05172e-24	1.39879	0.77	0.131	2.24552e-20
RPS28	1.09304e-24	1.6553	0.755	0.131	2.33374e-20
RPL7A	1.40461e-24	1.58911	0.764	0.131	2.99899e-20
ATP5G3	2.152e-24	1.45098	0.642	0.051	4.59473e-20
RPL10	2.28363e-24	0.996362	0.781	0.131	4.87578e-20
RPL18	2.73096e-24	1.40142	0.764	0.131	5.83086e-20
MT-ND4	2.88133e-24	1.28761	0.783	0.131	6.15193e-20
RPS9	3.15099e-24	1.56869	0.739	0.121	6.72768e-20
SH3BGRL3	3.42417e-24	-1.30742	0.778	0.949	7.31094e-20
RPS16	3.42442e-24	1.29064	0.74	0.111	7.31148e-20
RPL13	3.59275e-24	1.18497	0.77	0.131	7.67088e-20
RPS18	3.60338e-24	1.19051	0.772	0.131	7.69358e-20
RPS15	3.79703e-24	1.07918	0.762	0.121	8.10704e-20
RPL4	3.978e-24	0.888383	0.725	0.101	8.49343e-20
SEPTIN7	4.92218e-24	-1.10292	0.121	0.444	1.05094e-19
RPS2	5.2852e-24	1.37855	0.774	0.131	1.12844e-19
RPS4X	5.36936e-24	0.791838	0.761	0.131	1.14641e-19
RPS15A	6.6167e-24	1.18104	0.767	0.131	1.41273e-19
RPL15	6.90645e-24	1.43374	0.737	0.101	1.4746e-19
ATP5B	1.05781e-23	1.12346	0.687	0.081	2.25853e-19
RPS13	1.11697e-23	1.22762	0.751	0.121	2.38484e-19
RPL19	1.15559e-23	1.02628	0.75	0.111	2.46731e-19
RPS3	1.35219e-23	1.02525	0.752	0.121	2.88707e-19
RPL37	1.47339e-23	1.68513	0.731	0.121	3.14584e-19
RPS27	1.5276e-23	0.992443	0.748	0.121	3.26158e-19
RPS24	1.8089e-23	1.40554	0.748	0.131	3.86217e-19
RPL14	1.83098e-23	1.45278	0.735	0.121	3.90932e-19
FAM174C	2.01459e-23	-1.09834	0.16	0.505	4.30134e-19
PTMA	2.79862e-23	-1.35669	0.953	0.99	5.97533e-19
RPS27A	3.08887e-23	0.946879	0.752	0.121	6.59505e-19
PRKCQ-AS1	3.23115e-23	-0.714036	0.005	0.101	6.89884e-19
RPL18A	4.02141e-23	1.01266	0.757	0.131	8.58612e-19
FAM46C	4.39502e-23	0.958743	0.67	0.081	9.38381e-19
SEPTIN1	4.44944e-23	-0.957913	0.153	0.505	9.50001e-19
EEF1D	4.5589e-23	-1.03504	0.941	0.919	9.7337e-19
RPL30	5.1844e-23	0.96643	0.751	0.131	1.10692e-18
RPS29	6.17206e-23	1.40294	0.679	0.081	1.3178e-18
ATP5MF	7.63917e-23	-1.03091	0.193	0.606	1.63104e-18
TENT5C	8.03398e-23	-1.24859	0.186	0.566	1.71533e-18
RPS5	8.80033e-23	1.235	0.734	0.121	1.87896e-18
ATP5PD	9.17004e-23	-0.937981	0.163	0.525	1.95789e-18
RPL35	9.78284e-23	1.43433	0.711	0.111	2.08873e-18
RPL37A	1.04988e-22	1.44884	0.742	0.131	2.24159e-18
RPL17	1.17348e-22	1.25733	0.703	0.101	2.5055e-18
DANCR	1.19304e-22	-1.08867	0.182	0.566	2.54726e-18
ATP5D	1.24289e-22	1.14684	0.624	0.061	2.6537e-18
PEBP1	1.24596e-22	-1.51921	0.786	0.848	2.66025e-18
RPL29	1.35652e-22	0.878072	0.728	0.111	2.8963e-18
RPL35A	1.46375e-22	1.34644	0.709	0.101	3.12526e-18
TMSB4X	1.5061e-22	-1.52078	0.899	0.98	3.21568e-18
RPLP2	1.7147e-22	1.40587	0.726	0.121	3.66106e-18
RPL34	1.74532e-22	0.86872	0.739	0.131	3.72642e-18
ATP5MPL	1.94556e-22	-1.05502	0.184	0.566	4.15397e-18
ATP5L	2.06033e-22	1.28769	0.666	0.081	4.39901e-18
RPS6	2.66299e-22	1.25199	0.736	0.131	5.68575e-18
RPS23	3.21103e-22	0.951986	0.729	0.111	6.85586e-18
HSPA8	3.32e-22	-1.52714	0.894	0.909	7.08853e-18
RPSA	3.54097e-22	1.31422	0.717	0.111	7.56034e-18
RPS12	3.62796e-22	0.897581	0.734	0.121	7.74605e-18
HINT1	3.99192e-22	-1.14875	0.851	0.929	8.52314e-18
RPL36AL	4.34794e-22	1.36392	0.675	0.081	9.28328e-18
H3F3A	5.43473e-22	-1.19139	0.915	0.939	1.16037e-17
RPL6	6.96169e-22	1.03892	0.71	0.101	1.48639e-17
RRBP1	7.10408e-22	1.18833	0.918	0.475	1.51679e-17
COX4I1	7.66792e-22	-1.05534	0.947	0.939	1.63718e-17
MS4A1	8.2838e-22	-0.565526	0.008	0.121	1.76867e-17
RPL41	8.48928e-22	0.879694	0.733	0.131	1.81255e-17
VIM	8.70525e-22	-1.57828	0.957	0.949	1.85866e-17
RPS14	1.14131e-21	0.809334	0.727	0.131	2.43681e-17
OIP5-AS1	1.26181e-21	-0.646668	0.062	0.303	2.6941e-17
UBA52	1.29802e-21	-1.1106	0.897	0.929	2.7714e-17
RAB5IF	1.36759e-21	-0.955727	0.137	0.455	2.91994e-17
RPL26	1.51537e-21	1.39853	0.703	0.111	3.23547e-17
RPS3A	1.59674e-21	0.870716	0.717	0.111	3.4092e-17
CIAO2A	1.71968e-21	-1.05202	0.126	0.424	3.67168e-17
ATP5J2	1.79237e-21	1.17291	0.609	0.071	3.82689e-17
RBIS	1.81822e-21	-0.904383	0.168	0.525	3.88207e-17
RPL32	2.13462e-21	1.0387	0.708	0.121	4.55763e-17
FTL	2.44392e-21	-1.05053	0.957	0.99	5.21802e-17
CLIC1	2.61478e-21	-1.05067	0.946	0.929	5.58282e-17
SNHG6	2.78769e-21	-1.09204	0.111	0.404	5.95199e-17
C20orf24	2.80348e-21	0.797454	0.599	0.051	5.98571e-17
RPL36	4.19749e-21	1.4545	0.693	0.121	8.96205e-17
RPL12	4.8732e-21	1.29846	0.692	0.111	1.04048e-16
SUB1	8.80894e-21	-1.32496	0.971	0.909	1.8808e-16
RPL5	1.01638e-20	1.04612	0.701	0.111	2.17008e-16
PPBP	1.14172e-20	-1.18629	0.017	0.162	2.43769e-16
RPL23A	1.30212e-20	1.06371	0.702	0.121	2.78015e-16
RPS25	1.38307e-20	0.872486	0.701	0.121	2.953e-16
SLC66A3	1.4288e-20	-0.70078	0.057	0.283	3.05064e-16
ATP5E	1.69046e-20	1.36832	0.642	0.081	3.60931e-16
RPL10A	1.78769e-20	0.918492	0.708	0.131	3.8169e-16
RPL39	1.83251e-20	0.997286	0.7	0.121	3.91259e-16
ATP5MD	1.87433e-20	-0.895595	0.182	0.556	4.00189e-16
ATP5G2	2.73547e-20	1.24104	0.631	0.091	5.8405e-16
NDUFA11	3.97477e-20	-1.39572	0.668	0.808	8.48653e-16
ARHGDIB	4.13698e-20	-1.23593	0.815	0.899	8.83287e-16
PET100	5.72757e-20	0.696685	0.83	0.283	1.22289e-15
PABPC1	9.37943e-20	-1.26466	0.921	0.879	2.0026e-15
ATPIF1	9.94825e-20	0.850204	0.593	0.061	2.12405e-15
EDF1	1.39663e-19	-1.01913	0.845	0.879	2.98195e-15
ACTG1	1.59937e-19	-1.34892	0.912	0.949	3.41482e-15
CCNI	1.60341e-19	-1.25337	0.783	0.848	3.42343e-15
RPL13A	1.7404e-19	1.09611	0.676	0.111	3.71593e-15
RPL21	1.98732e-19	0.990439	0.672	0.111	4.24313e-15
S100A10	2.00229e-19	-1.62127	0.673	0.859	4.27509e-15
UQCRH	2.10492e-19	-1.19572	0.821	0.899	4.49421e-15
RPL27A	2.97509e-19	1.29477	0.612	0.081	6.35211e-15
RPL27	4.04622e-19	1.2349	0.651	0.111	8.63909e-15
PPIA	4.29484e-19	-1.20551	0.955	0.939	9.16991e-15
RPL22	4.40148e-19	0.993238	0.647	0.091	9.39761e-15
RPS17	4.43277e-19	0.912045	0.597	0.061	9.4644e-15
C14orf2	4.6663e-19	0.959416	0.561	0.051	9.96303e-15
RPS4Y1	4.79119e-19	0.887562	0.569	0.051	1.02297e-14
PFDN5	4.79246e-19	-1.17725	0.823	0.919	1.02324e-14
RPS11	6.11754e-19	1.05377	0.661	0.111	1.30616e-14
HNRNPA1	6.65945e-19	-1.29913	0.893	0.909	1.42186e-14
RPL7	7.09224e-19	1.01655	0.629	0.091	1.51426e-14
RPL9	7.35419e-19	0.860541	0.65	0.111	1.57019e-14
RPL24	8.60975e-19	1.04967	0.663	0.111	1.83827e-14
2025-09-02	1.12225e-18	0.606769	0.572	0.071	2.39613e-14
ATP5J	1.1311e-18	0.919822	0.573	0.061	2.41501e-14
RPS27L	1.8035e-18	0.873809	0.552	0.061	3.85065e-14
MYL12A	2.59144e-18	-1.48676	0.754	0.848	5.53299e-14
EIF4A1	2.63797e-18	-1.522	0.65	0.788	5.63233e-14
CIAO2B	2.76652e-18	-0.94313	0.164	0.475	5.9068e-14
RPL22L1	2.89445e-18	1.11983	0.566	0.071	6.17993e-14
VIM-AS1	3.46147e-18	-0.494203	0.015	0.141	7.39059e-14
ATP5C1	3.58284e-18	0.770456	0.557	0.061	7.64972e-14
RESF1	3.9356e-18	-0.655391	0.067	0.293	8.40289e-14
NUTM2A-AS1	4.21583e-18	-0.516926	0.046	0.242	9.00121e-14
MANEA-DT	4.56662e-18	-0.25798	0.015	0.141	9.75019e-14
ATP5G1	5.13869e-18	0.573717	0.539	0.04	1.09716e-13
MINOS1	5.44831e-18	0.802433	0.524	0.051	1.16327e-13
UCP2	6.72462e-18	-1.46191	0.721	0.808	1.43577e-13
SPCS1	7.2725e-18	-0.874441	0.958	0.869	1.55275e-13
GET3	7.86835e-18	-0.723762	0.11	0.374	1.67997e-13
SNHG16	8.01244e-18	-0.529892	0.055	0.263	1.71074e-13
ATP5I	8.9323e-18	0.970275	0.541	0.051	1.90713e-13
SNHG5	1.91294e-17	-0.974713	0.122	0.394	4.08432e-13
RPL31	2.15299e-17	0.701422	0.607	0.091	4.59685e-13
RPL38	2.97609e-17	1.21276	0.571	0.071	6.35425e-13
ATP5F1	6.90484e-17	0.390402	0.58	0.081	1.47425e-12
RPL23	7.04418e-17	0.899659	0.544	0.061	1.504e-12
CD99	9.8678e-17	-1.07849	0.873	0.909	2.10687e-12
IFI6	1.11567e-16	0.480054	0.824	0.303	2.38208e-12
CCDC18-AS1	1.12991e-16	-0.823234	0.087	0.323	2.41246e-12
TAGLN2	1.32802e-16	-1.43375	0.867	0.889	2.83545e-12
C19orf70	1.72097e-16	0.575183	0.484	0.03	3.67445e-12
SUMO2	1.74424e-16	-1.14889	0.787	0.828	3.72412e-12
SEC62	2.60277e-16	0.670665	0.937	0.535	5.55718e-12
PLAAT3	2.6355e-16	-0.680789	0.064	0.273	5.62705e-12
NME2	3.5082e-16	-1.17436	0.893	0.838	7.49036e-12
PFN1	4.29083e-16	-1.08662	0.91	0.96	9.16135e-12
SEC61B	4.47711e-16	-0.970274	0.936	0.879	9.55907e-12
XIST	6.74368e-16	-0.666578	0.043	0.222	1.43984e-11
RPL36A	7.84682e-16	0.687089	0.546	0.071	1.67537e-11
LIMD2	9.50064e-16	-1.20642	0.744	0.818	2.02848e-11
CORO1A	1.0551e-15	-1.09873	0.847	0.889	2.25274e-11
ZNF706	1.41387e-15	-1.17762	0.728	0.758	3.01875e-11
RAC2	1.47547e-15	-1.06636	0.856	0.848	3.15028e-11
USMG5	2.47739e-15	0.921816	0.508	0.071	5.28948e-11
FAM96B	2.60421e-15	0.633205	0.486	0.051	5.56025e-11
HLA-DQA2	2.82305e-15	-0.803851	0.08	0.293	6.02749e-11
RPS10	3.0336e-15	0.758416	0.51	0.061	6.47703e-11
2025-09-07	3.06037e-15	0.606485	0.51	0.071	6.53419e-11
YWHAB	3.32911e-15	-1.04461	0.846	0.838	7.10797e-11
CD52	3.54341e-15	-0.904118	0.696	0.848	7.56553e-11
SERP1	4.17807e-15	-1.13427	0.875	0.848	8.9206e-11
LTB	4.25638e-15	-1.87435	0.035	0.192	9.0878e-11
HSPA5	4.59043e-15	1.20992	0.967	0.768	9.80103e-11
HLA-DRB5	4.99057e-15	-1.84029	0.41	0.626	1.06554e-10
ATP5H	5.00428e-15	0.696029	0.485	0.051	1.06846e-10
GPX4	5.27878e-15	-1.38729	0.531	0.707	1.12707e-10
TEN1	5.60561e-15	-0.530263	0.061	0.253	1.19685e-10
CHCHD2	6.61683e-15	-1.02126	0.891	0.889	1.41276e-10
SNHG7	7.349e-15	-0.487093	0.06	0.253	1.56908e-10
SEPTIN9	9.87546e-15	-1.04597	0.129	0.374	2.10851e-10
CPEB4	1.04829e-14	0.538805	0.542	0.091	2.2382e-10
RPS19BP1	1.15034e-14	0.489823	0.473	0.051	2.45609e-10
SYNC	1.19735e-14	-0.877102	0.061	0.253	2.55645e-10
GTF3A	1.39399e-14	-1.18559	0.643	0.747	2.97631e-10
MICOS10	1.45473e-14	-0.922623	0.169	0.455	3.106e-10
2025-09-06	1.51865e-14	0.313429	0.506	0.071	3.24248e-10
EIF3F	1.5846e-14	-1.2422	0.769	0.768	3.38328e-10
AC009133.3	1.64906e-14	-0.276612	0.023	0.152	3.52091e-10
ACTB	1.91129e-14	-1.22288	0.98	0.98	4.08079e-10
ATP6V1G1	1.95687e-14	-1.25501	0.694	0.788	4.17812e-10
C19orf24	2.21023e-14	0.447138	0.482	0.061	4.71906e-10
CCNL1	2.72745e-14	0.454622	0.83	0.333	5.82338e-10
C8orf59	2.8315e-14	0.667219	0.473	0.051	6.04554e-10
MIF	2.95385e-14	-0.947365	0.87	0.899	6.30676e-10
IGLL5	4.74114e-14	2.22385	0.494	0.081	1.01228e-09
EIF3L	4.9311e-14	-1.06393	0.738	0.788	1.05284e-09
LSP1	5.29922e-14	-0.921651	0.909	0.869	1.13144e-09
SNHG32	6.81872e-14	-0.460088	0.027	0.162	1.45586e-09
FAM173A	7.81246e-14	0.399877	0.456	0.051	1.66804e-09
GAS6	8.60989e-14	0.488826	0.525	0.091	1.8383e-09
MZB1	9.35075e-14	0.639511	0.966	0.859	1.99648e-09
HIST1H1D	1.1235e-13	-0.0167913	0.553	0.111	2.39878e-09
NPM1	1.13626e-13	-1.06281	0.868	0.869	2.42604e-09
C17orf62	1.43589e-13	0.472437	0.48	0.071	3.06577e-09
COA8	1.49025e-13	-0.605388	0.066	0.253	3.18184e-09
CALM2	1.6069e-13	-1.25661	0.619	0.727	3.43089e-09
COTL1	1.7704e-13	-1.35644	0.554	0.747	3.77998e-09
S100A4	2.54767e-13	-1.34752	0.486	0.758	5.43952e-09
IGSF8	3.05406e-13	0.330325	0.61	0.152	6.52072e-09
CYBC1	5.66781e-13	-0.795575	0.145	0.384	1.21013e-08
NDUFB8	7.92873e-13	-1.24747	0.504	0.657	1.69286e-08
C17orf49	1.1671e-12	-0.991052	0.216	0.455	2.49189e-08
SERF2	1.29812e-12	-0.723511	0.928	0.929	2.77161e-08
RTFDC1	1.32209e-12	0.418805	0.385	0.02	2.8228e-08
IFI27	1.36811e-12	1.08195	0.369	0.01	2.92106e-08
2025-09-01	1.4874e-12	0.506494	0.461	0.071	3.17576e-08
IGLV3-1	1.53754e-12	1.93921	0.478	0.081	3.28281e-08
RPS20	1.5561e-12	0.434621	0.479	0.071	3.32243e-08
FAM96A	1.59816e-12	0.461137	0.381	0.02	3.41222e-08
2025-09-09	2.24444e-12	0.593613	0.402	0.04	4.79211e-08
ZNRD2	2.59084e-12	-0.507156	0.136	0.374	5.53169e-08
TCIRG1	2.65976e-12	0.328306	0.749	0.303	5.67884e-08
RHOA	2.73813e-12	-0.99917	0.843	0.859	5.84619e-08
EIF3K	2.89051e-12	-0.962281	0.856	0.818	6.17152e-08
RPS6KB2	3.4363e-12	0.429752	0.393	0.03	7.33685e-08
RNASEK	3.45556e-12	-0.972682	0.874	0.828	7.37796e-08
NIBAN1	3.48454e-12	-0.284527	0.031	0.162	7.43983e-08
YBX1	4.92004e-12	-1.32669	0.817	0.838	1.05048e-07
S100A6	5.17497e-12	-1.18306	0.619	0.768	1.10491e-07
APP	5.25086e-12	0.272209	0.442	0.061	1.12111e-07
GABARAP	5.44131e-12	-1.09455	0.8	0.818	1.16177e-07
EIF3H	5.75943e-12	-1.0843	0.712	0.758	1.2297e-07
SCPEP1	8.81283e-12	0.271637	0.581	0.152	1.88163e-07
HSP90B1	1.03817e-11	0.937584	0.986	0.919	2.2166e-07
PRORP	1.0541e-11	-0.465584	0.045	0.192	2.2506e-07
TUT7	1.0773e-11	-0.483358	0.053	0.212	2.30014e-07
MYL6	1.08777e-11	-0.857765	0.923	0.899	2.32249e-07
NCBP2AS2	1.15167e-11	-0.537635	0.087	0.273	2.45893e-07
CD79A	1.35876e-11	-1.37617	0.851	0.788	2.90109e-07
RARRES3	1.59969e-11	0.779454	0.365	0.02	3.41551e-07
PPDPF	1.7821e-11	-1.33253	0.567	0.707	3.80497e-07
CD320	1.92214e-11	0.599447	0.783	0.364	4.10395e-07
DYNLL1	2.23054e-11	-1.02007	0.66	0.747	4.76243e-07
YJU2	2.25641e-11	-0.218648	0.033	0.162	4.81766e-07
PSME1	2.27735e-11	-0.902273	0.874	0.838	4.86236e-07
LDHB	2.627e-11	-0.851149	0.854	0.859	5.60891e-07
SDC1	2.69319e-11	0.581644	0.464	0.091	5.75022e-07
PTPRCAP	3.3982e-11	0.707651	0.931	0.596	7.2555e-07
PITPNA-AS1	3.52825e-11	-0.517596	0.056	0.212	7.53316e-07
IGHG3	4.06047e-11	-0.978159	0.462	0.091	8.66951e-07
KIAA1551	4.10241e-11	0.377485	0.42	0.061	8.75906e-07
ARPC2	4.89988e-11	-0.97817	0.886	0.859	1.04617e-06
OST4	5.69758e-11	-0.70293	0.906	0.869	1.21649e-06
LMAN1	6.16826e-11	0.630979	0.957	0.717	1.31699e-06
C19orf66	6.42605e-11	0.34777	0.345	0.02	1.37202e-06
NCK1-DT	7.76938e-11	-0.206834	0.023	0.131	1.65884e-06
H3F3B	7.89093e-11	-0.693716	0.953	0.889	1.68479e-06
PDLIM1	9.35075e-11	-0.806119	0.484	0.626	1.99648e-06
PIGK	9.36939e-11	0.202018	0.523	0.121	2.00046e-06
SSPN	9.87647e-11	-0.714929	0.106	0.293	2.10873e-06
ZCCHC11	1.0489e-10	0.302853	0.393	0.051	2.2395e-06
NOP53	1.09795e-10	-1.04077	0.641	0.707	2.34422e-06
MTLN	1.1991e-10	-0.462878	0.053	0.202	2.56019e-06
LINC00539	1.22755e-10	-0.352017	0.02	0.121	2.62095e-06
EMC7	1.26992e-10	0.472785	0.839	0.384	2.71141e-06
ISG20	1.43215e-10	-0.976259	0.941	0.818	3.05779e-06
SSSCA1	1.44651e-10	0.354885	0.341	0.02	3.08844e-06
CCDC47	1.57953e-10	0.2078	0.627	0.212	3.37245e-06
SYNE2	1.70317e-10	0.20502	0.608	0.192	3.63645e-06
IL7R	1.95546e-10	-1.38263	0.049	0.192	4.17511e-06
MICOS13	2.04919e-10	-0.728208	0.146	0.364	4.37523e-06
ERP44	2.07991e-10	0.322751	0.846	0.444	4.44081e-06
NDUFC2	2.14592e-10	-1.1233	0.639	0.697	4.58176e-06
NUP42	2.55002e-10	-0.351875	0.059	0.212	5.44454e-06
YWHAZ	2.61908e-10	-1.00395	0.849	0.828	5.59201e-06
PHB2	2.76354e-10	-1.07488	0.675	0.687	5.90043e-06
FCRL5	2.81991e-10	0.345835	0.582	0.182	6.02079e-06
SHFL	2.86324e-10	-0.42341	0.093	0.273	6.11331e-06
IGLV2-14	3.09508e-10	1.08093	0.371	0.04	6.60831e-06
SKIV2L2	3.40988e-10	0.320018	0.338	0.03	7.28043e-06
KCNN3	3.48938e-10	0.305701	0.351	0.03	7.45017e-06
GALNT2	3.71217e-10	0.350244	0.724	0.283	7.92585e-06
RASGRP2	3.75552e-10	-0.99318	0.324	0.525	8.01842e-06
F2R	3.99157e-10	0.314521	0.332	0.02	8.52241e-06
NCBP2-AS2	4.02022e-10	0.240328	0.361	0.04	8.58357e-06
C1GALT1C1	4.05525e-10	0.368702	0.609	0.202	8.65837e-06
SRP19	4.16693e-10	-0.973841	0.404	0.586	8.89681e-06
MRPS24	4.27403e-10	-0.955869	0.698	0.727	9.12548e-06
PCBP1-AS1	4.34432e-10	-0.401982	0.037	0.162	9.27556e-06
AC008875.3	4.91539e-10	-0.281288	0.018	0.111	1.04949e-05
OS9	4.98306e-10	0.357783	0.895	0.535	1.06393e-05
UXT	5.10716e-10	-0.931888	0.653	0.727	1.09043e-05
UPF2	5.1823e-10	0.320368	0.504	0.131	1.10647e-05
NCLN	5.34699e-10	0.274016	0.691	0.253	1.14164e-05
MGEA5	5.38029e-10	0.344009	0.344	0.03	1.14874e-05
CYREN	5.58515e-10	-0.243566	0.041	0.172	1.19249e-05
EIF3G	5.80987e-10	-0.910062	0.734	0.747	1.24047e-05
CFAP410	6.24777e-10	-0.40017	0.077	0.242	1.33396e-05
SMDT1	6.37562e-10	-1.17069	0.681	0.697	1.36126e-05
SEL1L	6.50704e-10	0.541609	0.81	0.414	1.38932e-05
COX5A	6.62998e-10	-0.893479	0.844	0.798	1.41557e-05
HIST1H4C	6.68491e-10	1.21496	0.633	0.273	1.42729e-05
AKAP2	7.05851e-10	0.330865	0.372	0.051	1.50706e-05
HCG18	8.63368e-10	-0.327686	0.026	0.131	1.84338e-05
ARF5	9.03139e-10	-0.77552	0.676	0.717	1.92829e-05
UBE2J1	1.00192e-09	-0.758541	0.933	0.798	2.13921e-05
RPA3	1.02516e-09	0.434548	0.312	0.02	2.18881e-05
ARPC3	1.03674e-09	-0.809483	0.881	0.838	2.21354e-05
MAGED2	1.05014e-09	0.347196	0.541	0.172	2.24215e-05
SLC9A3R1	1.17188e-09	-0.895166	0.686	0.747	2.50208e-05
UBALD2	1.22693e-09	0.296598	0.472	0.121	2.61962e-05
LILRB4	1.24342e-09	0.548664	0.609	0.232	2.65482e-05
CCPG1	1.27343e-09	0.0767918	0.756	0.333	2.7189e-05
JTB	1.31069e-09	-0.853205	0.759	0.788	2.79845e-05
TNFAIP8	1.33984e-09	-1.06891	0.316	0.485	2.86069e-05
RO60	1.39449e-09	-0.588232	0.086	0.253	2.97737e-05
NDUFA3	1.40164e-09	0.427252	0.833	0.465	2.99264e-05
CHID1	1.4307e-09	0.240119	0.739	0.313	3.05469e-05
ANTKMT	1.52555e-09	-0.612511	0.118	0.303	3.2572e-05
NEIL1	1.55751e-09	-0.411343	0.023	0.121	3.32544e-05
IGLV1-40	1.55998e-09	1.62026	0.336	0.03	3.33071e-05
PTPN6	1.59306e-09	-0.962433	0.445	0.586	3.40135e-05
GABPB1-IT1	1.62532e-09	-0.388016	0.019	0.111	3.47021e-05
GADD45B	1.6399e-09	0.391706	0.422	0.091	3.50136e-05
EEF1AKMT4	1.79182e-09	-0.292589	0.044	0.172	3.82572e-05
SAMSN1	1.8227e-09	0.361146	0.419	0.091	3.89164e-05
MTREX	1.98162e-09	-0.445224	0.048	0.182	4.23096e-05
CDK2AP2	2.03777e-09	-1.22896	0.618	0.667	4.35084e-05
FAM69A	2.04388e-09	0.283006	0.345	0.04	4.3639e-05
C1orf186	2.06235e-09	0.308713	0.341	0.04	4.40332e-05
CNBP	2.06825e-09	-1.0123	0.713	0.747	4.41593e-05
TRMT112	2.16338e-09	-0.866829	0.697	0.687	4.61903e-05
GGH	2.33912e-09	0.498274	0.689	0.313	4.99425e-05
SDHAF2	2.42075e-09	-0.708816	0.193	0.384	5.16855e-05
PRCP	2.46936e-09	0.254943	0.589	0.192	5.27233e-05
EIF4B	2.49715e-09	-0.94523	0.777	0.737	5.33166e-05
FBH1	2.70359e-09	-0.4462	0.081	0.242	5.77243e-05
AES	2.71921e-09	0.655102	0.394	0.071	5.80579e-05
GNG7	2.79574e-09	-1.01255	0.541	0.636	5.96918e-05
UBE2D3	2.9745e-09	-0.825199	0.808	0.788	6.35085e-05
TRAPPC5	2.98742e-09	-0.825832	0.674	0.717	6.37845e-05
ASNA1	3.14957e-09	0.107472	0.35	0.04	6.72464e-05
FBXO18	3.18578e-09	0.274773	0.308	0.02	6.80196e-05
SPAG4	3.2637e-09	0.344542	0.288	0.01	6.96833e-05
MAGED1	3.48005e-09	0.194552	0.624	0.242	7.43025e-05
BTG2	3.57556e-09	0.415119	0.742	0.343	7.63418e-05
ARPC1B	3.83146e-09	-1.02509	0.746	0.778	8.18054e-05
HOTAIRM1	4.24881e-09	-0.177202	0.017	0.101	9.07162e-05
FNDC3B	4.32169e-09	0.341972	0.795	0.394	9.22724e-05
SEPTIN2	4.4877e-09	-0.662561	0.154	0.354	9.58168e-05
HSPA13	4.67464e-09	0.228946	0.703	0.293	9.98082e-05
SLC38A5	4.90084e-09	0.486021	0.673	0.323	0.000104638
C5orf56	4.94989e-09	-0.624048	0.268	0.455	0.000105685
LINC00969	5.04985e-09	0.310408	0.33	0.04	0.000107819
TMEM57	5.18433e-09	0.29588	0.313	0.03	0.000110691
TRBC2	5.19671e-09	-0.617823	0.2	0.414	0.000110955
PSMA2	5.29326e-09	-1.16792	0.567	0.636	0.000113016
IGKV3OR2-268	5.37011e-09	0.30217	0.283	0.01	0.000114657
CENPC	5.38001e-09	0.312551	0.516	0.152	0.000114868
RTF2	5.38969e-09	-0.394556	0.101	0.273	0.000115075
CCR2	5.92536e-09	0.359452	0.328	0.04	0.000126512
MSI2	5.98275e-09	0.291372	0.442	0.101	0.000127738
FP565260.6	7.2848e-09	0.258289	0.275	0.01	0.000155538
ALOX12-AS1	8.40334e-09	-0.310958	0.017	0.101	0.00017942
VPS37B	8.63721e-09	0.329702	0.696	0.303	0.000184413
UBB	8.71591e-09	-0.828026	0.799	0.818	0.000186093
EIF3E	8.76027e-09	-1.02514	0.689	0.687	0.00018704
HMGB1	1.01194e-08	-0.754408	0.923	0.909	0.00021606
CTAGE5	1.01294e-08	0.299228	0.289	0.02	0.000216273
SIL1	1.01453e-08	0.334431	0.788	0.384	0.000216613
IGLC1	1.01916e-08	-0.273519	0.149	0.354	0.0002176
TASOR	1.19906e-08	-0.209732	0.029	0.131	0.000256011
IL6ST	1.21929e-08	0.219155	0.466	0.131	0.000260331
MAP3K8	1.24742e-08	0.22673	0.391	0.081	0.000266337
BRK1	1.26253e-08	-0.771945	0.635	0.707	0.000269564
DNMBP	1.324e-08	-0.322307	0.021	0.111	0.000282688
COX7A2L	1.37563e-08	-0.976422	0.589	0.657	0.00029371
KDM5D	1.49153e-08	0.185663	0.457	0.111	0.000318457
RBM3	1.51559e-08	-0.990315	0.79	0.737	0.000323593
GPSM3	1.55596e-08	-1.07642	0.534	0.646	0.000332213
SLC7A5	1.6383e-08	0.322237	0.398	0.091	0.000349793
LINC01781	1.67732e-08	-0.737628	0.119	0.293	0.000358125
SRP14	1.70131e-08	-0.934272	0.844	0.808	0.000363247
TYROBP	1.7979e-08	-1.47775	0.073	0.222	0.000383869
CERT1	1.93011e-08	-0.346306	0.038	0.152	0.000412097
VAMP2	1.9624e-08	-1.2199	0.407	0.545	0.000418992
OGA	1.97414e-08	-0.500965	0.068	0.212	0.000421499
GIMAP5	2.06063e-08	-0.575427	0.025	0.121	0.000439966
NFKBIZ	2.13564e-08	0.235137	0.417	0.101	0.000455981
AC078883.1	2.16786e-08	-0.647662	0.082	0.232	0.00046286
MRPL12	2.17401e-08	-0.68038	0.251	0.434	0.000464172
SLC2A5	2.24881e-08	0.306419	0.386	0.081	0.000480143
TROVE2	2.38779e-08	0.30293	0.326	0.051	0.000509817
PSMB1	2.38879e-08	-0.890198	0.86	0.798	0.00051003
ARPC1A	2.40687e-08	-0.389449	0.101	0.263	0.000513891
SSR2	2.41058e-08	-0.462234	0.977	0.869	0.000514683
SPCS3	2.43972e-08	0.446272	0.954	0.717	0.000520905
IGHV3-15	2.4799e-08	-1.84043	0.034	0.141	0.000529485
ATP6AP2	2.62652e-08	0.124437	0.823	0.414	0.000560789
HLA-E	2.74025e-08	-0.777363	0.986	0.96	0.000585071
DNASE2	2.74581e-08	0.259898	0.55	0.192	0.000586258
HCLS1	2.85726e-08	-0.898458	0.794	0.778	0.000610053
CITED2	2.98292e-08	-1.30381	0.466	0.576	0.000636883
PLOD3	3.18631e-08	0.166515	0.472	0.131	0.000680308
IL16	3.23381e-08	-0.89035	0.247	0.424	0.000690451
CALM1	3.50007e-08	-0.778576	0.855	0.838	0.0007473
GMFG	3.50857e-08	-0.876038	0.762	0.788	0.000749116
PARP1	3.5443e-08	-0.881371	0.749	0.707	0.000756743
CXCR3	3.59857e-08	0.367867	0.538	0.192	0.000768331
FUCA2	3.73602e-08	0.23118	0.526	0.182	0.000797677
SNHG1	3.80491e-08	-0.572213	0.07	0.212	0.000812387
CALU	3.9163e-08	0.339229	0.796	0.404	0.00083617
CCDC88A	4.08828e-08	0.155755	0.441	0.121	0.000872888
LRPAP1	4.1812e-08	0.347105	0.912	0.586	0.000892728
CBWD5	4.34115e-08	0.155511	0.53	0.182	0.00092688
MX1	4.37939e-08	0.18783	0.59	0.222	0.000935044
ABHD3	4.43442e-08	0.225904	0.505	0.162	0.000946792
SLC25A3	5.34943e-08	-0.796245	0.875	0.778	0.00114216
UTY	5.53436e-08	0.257634	0.327	0.051	0.00118164
PTP4A1	6.47779e-08	0.258139	0.299	0.04	0.00138307
GAB1	6.8772e-08	0.190973	0.59	0.212	0.00146835
UFC1	7.00783e-08	-0.830221	0.722	0.717	0.00149624
CLK1	7.11849e-08	0.178869	0.516	0.172	0.00151987
B4GALT1	7.26112e-08	0.384182	0.464	0.152	0.00155032
PECAM1	7.43646e-08	0.0537926	0.483	0.141	0.00158776
RXYLT1	7.47329e-08	-0.39149	0.032	0.131	0.00159562
KLRK1	7.71569e-08	-0.79816	0.041	0.152	0.00164738
FXYD5	7.97248e-08	-0.830864	0.941	0.889	0.0017022
LINC00116	8.73828e-08	0.249326	0.249	0.01	0.00186571
IGHV2-70	8.84735e-08	-3.5621	0.032	0.131	0.001889
SLC25A5	8.87438e-08	-1.00754	0.792	0.768	0.00189477
P2RX1	9.09474e-08	0.157297	0.372	0.081	0.00194182
RPL7L1	9.40619e-08	0.122178	0.286	0.03	0.00200832
SNRPD2	9.98102e-08	-0.85466	0.739	0.747	0.00213105
REC8	1.0223e-07	0.264562	0.349	0.071	0.00218271
CHD9	1.03118e-07	0.0961335	0.502	0.152	0.00220168
MIR4435-2HG	1.13975e-07	0.259276	0.564	0.222	0.00243347
AL441992.1	1.14146e-07	-0.203631	0.036	0.141	0.00243712
SCARB2	1.18256e-07	0.261581	0.728	0.364	0.00252488
DIPK1A	1.21767e-07	-0.578522	0.075	0.212	0.00259985
SOCS3	1.33259e-07	0.169418	0.245	0.01	0.00284522
DNAJC3	1.5109e-07	0.365372	0.877	0.515	0.00322593
PCBP2	1.52536e-07	-0.863181	0.762	0.788	0.00325681
LY6E	1.61772e-07	0.521675	0.903	0.596	0.00345399
CD37	1.72482e-07	-1.20678	0.793	0.758	0.00368266
B2M	1.78701e-07	-0.352308	0.998	1	0.00381544
CSNK2B	1.82742e-07	-0.911063	0.699	0.707	0.00390172
CIRBP	1.84332e-07	-0.930738	0.831	0.737	0.00393568
CAPZB	1.89152e-07	-0.945922	0.644	0.707	0.00403858
PPP1CA	1.94266e-07	-0.796505	0.756	0.758	0.00414778
IFI27L1	1.94845e-07	0.299871	0.711	0.354	0.00416014
RASA2	1.99311e-07	0.146257	0.494	0.172	0.00425549
ATP5O	2.04885e-07	0.244233	0.251	0.02	0.0043745
C21orf2	2.12076e-07	0.225869	0.25	0.02	0.00452804
GSTK1	2.23155e-07	-0.865889	0.822	0.737	0.00476459
RPP21	2.24126e-07	0.236578	0.264	0.03	0.00478531
NDUFB1	2.28442e-07	0.421599	0.583	0.273	0.00487746
AL135905.2	2.35308e-07	-0.70499	0.071	0.202	0.00502406
QPCTL	2.39733e-07	0.13683	0.305	0.051	0.00511855
GABPB1	2.57614e-07	0.221805	0.359	0.081	0.00550032
NCSTN	2.63623e-07	0.159787	0.489	0.162	0.00562861
SRPRA	2.64583e-07	0.364484	0.906	0.566	0.0056491
GAPDH	2.73094e-07	-0.645738	0.987	0.949	0.00583084
CLPTM1L	2.83071e-07	0.150656	0.628	0.263	0.00604385
CFL1	2.89146e-07	-0.823536	0.897	0.828	0.00617357
EDEM2	3.10856e-07	0.20042	0.81	0.434	0.00663708
TMEM184B	3.22321e-07	0.233664	0.37	0.091	0.00688187
AC004687.1	3.32402e-07	-0.428289	0.025	0.111	0.00709711
FNDC3A	3.35989e-07	0.211412	0.601	0.232	0.0071737
KTN1	3.37197e-07	0.237704	0.74	0.364	0.00719949
RALY	3.47714e-07	-0.796467	0.725	0.707	0.00742404
CD38	3.49602e-07	0.265242	0.953	0.677	0.00746434
LMF2	3.62567e-07	0.0287077	0.567	0.212	0.00774117
TM9SF4	3.64009e-07	0.0257803	0.433	0.131	0.00777195
HIST1H2AJ	3.74287e-07	0.651144	0.241	0.02	0.00799141
DPM3	3.80065e-07	0.334512	0.684	0.333	0.00811476
ADRM1	3.92746e-07	-0.753842	0.632	0.687	0.00838551
CORO7	3.93769e-07	-0.639472	0.19	0.354	0.00840737
ANKRD36C	3.96885e-07	-0.110166	0.306	0.051	0.00847389
PABPC4	4.00663e-07	-0.7295	0.604	0.636	0.00855456
MIR155HG	4.02297e-07	0.180254	0.249	0.02	0.00858944
NAA10	4.07868e-07	0.166732	0.503	0.182	0.00870839
TRAF3IP3	4.16532e-07	-0.988121	0.658	0.646	0.00889337
FKBP1A	4.32745e-07	-0.865391	0.688	0.697	0.00923955
MAN1A1	4.36594e-07	0.312952	0.779	0.414	0.00932173
NEAT1	4.43021e-07	0.265229	0.932	0.616	0.00945894
COL18A1	4.73907e-07	-0.408315	0.055	0.172	0.0101184
TUT4	4.81313e-07	-0.357499	0.072	0.202	0.0102765
LGALS1	4.92957e-07	-0.73063	0.855	0.859	0.0105251
GIHCG	4.94172e-07	-0.213672	0.022	0.101	0.0105511
NUPL2	4.97242e-07	0.225398	0.257	0.03	0.0106166
TWF2	5.05571e-07	-0.929994	0.389	0.505	0.0107944
RAB30-DT	5.18789e-07	-0.223861	0.035	0.131	0.0110767
C9orf16	5.40667e-07	-0.751017	0.57	0.646	0.0115438
SF3B5	5.43519e-07	-0.686342	0.674	0.697	0.0116047
XRN1	5.46279e-07	0.161056	0.596	0.242	0.0116636
AC025159.1	5.53062e-07	-0.334498	0.045	0.152	0.0118084
ZMPSTE24	5.6024e-07	0.239837	0.465	0.162	0.0119617
ETV6	5.61184e-07	0.209697	0.413	0.121	0.0119818
LINC01578	5.8758e-07	-0.363299	0.062	0.182	0.0125454
DBI	6.03951e-07	-0.714459	0.649	0.687	0.012895
NEU1	6.08026e-07	0.166957	0.685	0.323	0.012982
SLC38A2	6.2794e-07	0.0122749	0.67	0.293	0.0134072
GLB1	6.35448e-07	0.195747	0.398	0.111	0.0135674
PRDX1	6.447e-07	-0.743176	0.827	0.747	0.013765
RNF213	6.46645e-07	0.306858	0.827	0.485	0.0138065
IGHG1	6.57721e-07	2.13366	0.609	0.404	0.014043
GPR15	6.63143e-07	-0.385046	0.055	0.172	0.0141588
GPX1	6.87562e-07	0.249606	0.31	0.061	0.0146801
STAG1	6.93777e-07	0.0974516	0.393	0.111	0.0148128
PGM3	7.02861e-07	0.0540361	0.354	0.081	0.0150068
MYL12B	7.04634e-07	-0.926896	0.604	0.657	0.0150446
SELENOH	7.63189e-07	-0.770148	0.709	0.677	0.0162949
IGHM	8.29679e-07	2.12664	0.447	0.162	0.0177145
MBTPS1	8.40444e-07	0.214996	0.555	0.222	0.0179443
C6orf106	8.42013e-07	0.210046	0.234	0.02	0.0179778
STAT3	8.4455e-07	-0.0853853	0.557	0.212	0.018032
TBCA	8.54753e-07	-0.74402	0.606	0.657	0.0182498
GNPTAB	8.56413e-07	0.226147	0.395	0.111	0.0182853
EVI2B	8.60871e-07	-1.01648	0.631	0.636	0.0183805
UBE2I	8.74332e-07	-0.900648	0.608	0.626	0.0186679
C1QBP	8.7564e-07	-0.948938	0.661	0.657	0.0186958
ZCCHC6	9.02332e-07	0.133042	0.264	0.04	0.0192657
LIME1	9.12807e-07	-0.704976	0.914	0.768	0.0194893
APRT	9.17506e-07	-0.868694	0.664	0.667	0.0195897
SOD1	9.48381e-07	-0.774893	0.613	0.657	0.0202489
BST2	9.62671e-07	0.287747	0.867	0.545	0.020554
APOL6	9.94756e-07	0.0325601	0.404	0.121	0.021239
RPRD1A	9.99011e-07	0.201149	0.231	0.02	0.0213299
XPO4	1.00319e-06	0.159885	0.364	0.091	0.021419
RPIA	1.00324e-06	0.205958	0.218	0.01	0.0214202
ISCU	1.02612e-06	-0.885991	0.73	0.707	0.0219087
FIS1	1.03262e-06	-0.779459	0.691	0.667	0.0220475
RDH11	1.05438e-06	0.122694	0.371	0.101	0.0225121
CDK11A	1.05495e-06	0.172926	0.363	0.091	0.0225242
DELE1	1.10617e-06	-0.592233	0.052	0.162	0.0236178
KIAA0141	1.11041e-06	0.218857	0.229	0.02	0.0237084
2025-09-11	1.12575e-06	0.203933	0.214	0.01	0.0240359
TBC1D9	1.17865e-06	-0.414229	0.097	0.232	0.0251654
COPZ1	1.18604e-06	-0.766176	0.655	0.657	0.0253232
ABRACL	1.25745e-06	-0.913825	0.563	0.616	0.0268479
NTAN1	1.26381e-06	-0.801039	0.269	0.404	0.0269836
PDIA5	1.26614e-06	0.235377	0.623	0.263	0.0270333
SARAF	1.2835e-06	-0.683498	0.964	0.838	0.027404
ZFAND6	1.31404e-06	-0.795066	0.444	0.535	0.0280562
PARK7	1.3208e-06	-0.69432	0.737	0.758	0.0282004
PLOD1	1.35586e-06	0.196508	0.356	0.091	0.0289489
CCND2	1.36282e-06	0.237515	0.493	0.192	0.0290975
MARS	1.38399e-06	0.135889	0.61	0.253	0.0295496
LSM2	1.38651e-06	-0.943394	0.469	0.556	0.0296034
PUM2	1.4385e-06	0.16161	0.38	0.111	0.0307134
ASCC3	1.4407e-06	0.238775	0.436	0.152	0.0307605
TNFAIP3	1.48655e-06	0.199775	0.351	0.091	0.0317393
PRDX5	1.51992e-06	-0.742627	0.824	0.727	0.0324517
CXXC5	1.54292e-06	-0.685117	0.502	0.566	0.032943
IGKV1-5	1.64472e-06	-0.723006	0.288	0.051	0.0351164
PTCH2	1.65893e-06	0.32569	0.255	0.04	0.0354199
RPS6KA1	1.69952e-06	0.249435	0.192	0	0.0362865
PAPD4	1.71797e-06	0.165289	0.228	0.02	0.0366804
AHNAK	1.73918e-06	-0.986629	0.796	0.818	0.0371333
AKAP9	1.74821e-06	0.0323857	0.768	0.414	0.0373261
GM2A	1.89861e-06	0.0647852	0.419	0.131	0.0405371
ADGRG5	1.94364e-06	0.0298355	0.302	0.061	0.0414986
DDX5	1.95094e-06	-1.13488	0.947	0.919	0.0416545
TMEM173	1.95628e-06	0.157064	0.326	0.081	0.0417685
PPP1R14A	1.95683e-06	-0.630899	0.047	0.152	0.0417803
SLC37A1	1.97471e-06	0.120994	0.374	0.101	0.042162
DERL1	2.11912e-06	0.307007	0.902	0.636	0.0452454
PIM3	2.11994e-06	0.256408	0.335	0.091	0.0452628
ANKRD36B	2.1405e-06	0.234911	0.351	0.101	0.0457018
PMAIP1	2.17267e-06	0.316248	0.207	0.01	0.0463888
TMEM19	2.18768e-06	0.189379	0.489	0.182	0.0467092
PDE4B	2.20559e-06	0.127326	0.587	0.253	0.0470916
SLC16A1-AS1	2.21427e-06	-0.355666	0.024	0.101	0.0472768
SNRPD3	2.24711e-06	0.192979	0.528	0.212	0.0479781
LAMP2	2.26934e-06	0.153368	0.535	0.212	0.0484527
GATD3A	2.27434e-06	-0.203428	0.024	0.101	0.0485594
C21orf59	2.28526e-06	0.063811	0.227	0.02	0.0487927
SASS6	2.3192e-06	0.183315	0.206	0.01	0.0495172
AP1S2	2.33303e-06	-1.17705	0.187	0.333	0.0498126
BUB1	2.37712e-06	0.275054	0.316	0.081	0.0507539
HNRNPF	2.4196e-06	-0.844494	0.581	0.606	0.0516609
SH3BGRL	2.44396e-06	-0.954165	0.54	0.596	0.0521809
NAPG	2.48857e-06	0.0466496	0.325	0.081	0.0531335
CNPY2	2.50816e-06	-0.731707	0.48	0.566	0.0535518
FOXN2	2.54685e-06	-0.0391136	0.377	0.111	0.0543778
MIA3	2.64485e-06	0.182539	0.6	0.283	0.0564703
PAFAH1B2	2.70426e-06	0.170647	0.205	0.01	0.0577387
RPL26L1	2.70922e-06	0.178494	0.273	0.051	0.0578447
CHD4	2.7571e-06	0.166007	0.423	0.141	0.0588669
HIST1H1B	2.77195e-06	-0.869734	0.256	0.04	0.0591838
ARL6IP1	2.8351e-06	-0.920086	0.597	0.616	0.0605322
CHPF	2.88457e-06	0.215427	0.756	0.404	0.0615884
MYDGF	2.89276e-06	0.312267	0.959	0.798	0.0617633
EAF2	2.96345e-06	-0.80825	0.711	0.707	0.0632726
DUSP5	3.03007e-06	0.361394	0.433	0.162	0.0646951
CTSC	3.03052e-06	-0.00193371	0.721	0.354	0.0647046
RPA1	3.06706e-06	0.184826	0.184	0	0.0654847
IGLC2	3.14105e-06	1.57892	0.576	0.333	0.0670646
PRDM1	3.19767e-06	0.1698	0.878	0.505	0.0682734
IGKV3-20	3.20963e-06	1.00115	0.372	0.111	0.0685289
ATF6	3.33224e-06	0.247658	0.439	0.162	0.0711467
USP30-AS1	3.41792e-06	-0.307413	0.029	0.111	0.0729759
GNG5	3.46278e-06	-0.732331	0.811	0.768	0.0739339
PPM1M	3.52988e-06	-0.406868	0.123	0.263	0.0753665
ALKBH7	3.62219e-06	-0.838168	0.573	0.596	0.0773373
NECAP1	3.66495e-06	0.202781	0.379	0.121	0.0782504
EIF3I	3.7319e-06	-0.845556	0.614	0.657	0.0796797
EMC1	3.76812e-06	0.160552	0.31	0.071	0.0804531
SELENOI	3.79131e-06	0.0395622	0.394	0.121	0.0809482
MFF	3.88017e-06	-0.919473	0.683	0.636	0.0828455
PYCARD	3.92648e-06	-0.837207	0.548	0.616	0.0838343
MACO1	3.93851e-06	-0.24919	0.029	0.111	0.0840912
IL12RB1	3.95939e-06	0.150593	0.292	0.061	0.0845369
ILF3-DT	4.02357e-06	-0.232523	0.039	0.131	0.0859073
SPTY2D1	4.03708e-06	0.181045	0.395	0.131	0.0861958
ATP11B	4.15835e-06	0.2054	0.469	0.182	0.088785
GAA	4.2203e-06	0.175996	0.251	0.04	0.0901076
C1orf27	4.22648e-06	0.164224	0.217	0.02	0.0902396
SHLD2	4.24677e-06	-0.193517	0.025	0.101	0.0906729
GPRIN3	4.27317e-06	0.180287	0.353	0.101	0.0912364
SLC3A2	4.33017e-06	0.346862	0.668	0.343	0.0924534
COL4A3BP	4.37304e-06	0.191056	0.23	0.03	0.0933688
P2RX5	4.54699e-06	-0.650703	0.269	0.404	0.0970828
ITGAL	4.60387e-06	-0.0247003	0.456	0.162	0.0982972
MAN2A1	4.65267e-06	0.0165415	0.643	0.313	0.0993392
AD000671.2	4.68225e-06	0.175735	0.195	0.01	0.0999707
SPNS1	4.75516e-06	0.174519	0.397	0.131	0.101527
MTPN	4.7997e-06	-0.85261	0.367	0.475	0.102478
RERE	4.831e-06	0.181571	0.196	0.01	0.103147
LITAF	4.91393e-06	-0.940641	0.668	0.667	0.104917
RPF1	4.94376e-06	0.165058	0.194	0.01	0.105554
RAN	4.95948e-06	-0.913772	0.784	0.737	0.10589
PGLS	4.99286e-06	-0.776515	0.342	0.465	0.106603
AL365205.1	5.09561e-06	0.0540813	0.216	0.02	0.108796
SEC24D	5.5172e-06	0.112629	0.697	0.333	0.117798
VKORC1	5.77381e-06	-0.60162	0.293	0.434	0.123277
CREB3L2	5.99331e-06	0.220243	0.584	0.263	0.127963
DDX3X	6.05503e-06	0.0731037	0.501	0.202	0.129281
EIF2S3	6.13678e-06	-1.00166	0.533	0.576	0.131026
RPUSD3	6.18778e-06	0.16227	0.191	0.01	0.132115
NDUFA13	6.19015e-06	-0.580887	0.898	0.778	0.132166
ERAP1	6.22433e-06	-0.0965333	0.469	0.172	0.132896
ARL6IP4	6.32005e-06	-0.714528	0.758	0.687	0.134939
TXNDC15	6.3326e-06	0.159182	0.828	0.505	0.135207
GPR89B	6.36372e-06	0.183137	0.369	0.121	0.135872
PLA2G16	6.45814e-06	0.181476	0.193	0.01	0.137888
CCNG1	6.55481e-06	-0.932826	0.3	0.424	0.139952
RPA2	6.57582e-06	0.183134	0.245	0.04	0.1404
FDX1	6.64706e-06	-0.87597	0.586	0.586	0.141921
DRAP1	6.64981e-06	-0.685333	0.765	0.707	0.14198
IGLV5-37	6.84346e-06	7.17583	0.189	0.01	0.146115
NSF	7.02807e-06	0.113575	0.361	0.111	0.150056
MCUB	7.0391e-06	-0.946104	0.384	0.485	0.150292
RANBP2	7.13284e-06	0.00999147	0.569	0.253	0.152293
KIAA0368	7.13401e-06	0.190816	0.253	0.051	0.152318
NUP210	7.1464e-06	0.054889	0.479	0.192	0.152583
LAMC1	7.17433e-06	0.152974	0.229	0.03	0.153179
HIST2H2AC	7.29904e-06	0.249923	0.238	0.04	0.155842
CCNL2	7.37554e-06	-0.0892071	0.332	0.091	0.157475
TSHZ2	7.68746e-06	-0.159613	0.03	0.111	0.164135
CEP128	7.78568e-06	0.123856	0.52	0.212	0.166232
CD81	7.88603e-06	0.221144	0.388	0.131	0.168375
RNF145	7.96165e-06	0.171011	0.377	0.121	0.169989
TNFRSF17	8.02079e-06	-0.611438	0.891	0.788	0.171252
BIK	8.0966e-06	-0.532165	0.221	0.354	0.172871
RPP30	8.51593e-06	0.167364	0.189	0.01	0.181824
TENT2	8.51594e-06	-0.368022	0.046	0.141	0.181824
USP14	8.66876e-06	0.154156	0.479	0.182	0.185087
PQLC3	8.89109e-06	0.195327	0.219	0.03	0.189834
TGFBR2	8.89593e-06	0.0326761	0.292	0.071	0.189937
CDK14	9.04925e-06	0.126312	0.292	0.071	0.193211
ALG1	9.10523e-06	0.137448	0.519	0.212	0.194406
PRR4	9.14109e-06	0.156294	0.186	0.01	0.195171
TOR3A	9.26362e-06	0.333752	0.808	0.515	0.197788
HRASLS2	9.4286e-06	0.230739	0.221	0.03	0.20131
UCHL1	9.50744e-06	0.299413	0.202	0.02	0.202993
PIGT	9.57873e-06	0.101617	0.796	0.414	0.204516
FKBP14	1.03929e-05	0.226112	0.299	0.081	0.221898
C16orf62	1.04395e-05	0.154517	0.184	0.01	0.222894
TPM4	1.04805e-05	-0.925783	0.592	0.596	0.223769
TPI1	1.04918e-05	-0.792886	0.808	0.758	0.224011
DDX1	1.05222e-05	0.174202	0.322	0.091	0.224659
RP9	1.06267e-05	0.157488	0.184	0.01	0.226891
PIK3CD-AS2	1.07242e-05	-0.286243	0.036	0.121	0.228973
SUN2	1.08078e-05	-0.0470892	0.38	0.131	0.230758
SH3BP5	1.10786e-05	-0.728323	0.301	0.414	0.236539
TAPBPL	1.11221e-05	0.175132	0.622	0.273	0.237468
AC134772.2	1.11545e-05	0.145147	0.184	0.01	0.238159
FKBP3	1.1181e-05	0.00860694	0.484	0.192	0.238726
MTDH	1.12434e-05	-0.701609	0.941	0.818	0.240057
AAK1	1.13394e-05	0.14666	0.38	0.131	0.242108
LZTFL1	1.15382e-05	-0.55819	0.153	0.283	0.246352
IGLV2-8	1.1549e-05	1.71831	0.219	0.03	0.246582
BCL2L11	1.17562e-05	0.152149	0.438	0.162	0.251007
UBE2D2	1.17836e-05	-0.743636	0.8	0.687	0.251591
RNF19A	1.18521e-05	0.0717157	0.452	0.172	0.253055
TPM3	1.20038e-05	-0.878449	0.733	0.707	0.256293
IGF2R	1.24331e-05	0.187164	0.303	0.081	0.265458
SURF4	1.2776e-05	0.216419	0.805	0.444	0.27278
PSMB9	1.30018e-05	-0.849126	0.758	0.697	0.277601
NPIPB15	1.30297e-05	-0.213932	0.042	0.131	0.278196
TMEM131	1.32366e-05	0.153223	0.322	0.091	0.282615
ARPC4	1.32417e-05	-0.647686	0.404	0.505	0.282724
KLHDC4	1.32674e-05	0.162874	0.306	0.081	0.283271
PRDX4	1.3442e-05	0.285521	0.912	0.596	0.287001
IGLV6-57	1.36815e-05	4.70781	0.243	0.051	0.292114
WDR74	1.38159e-05	0.210477	0.459	0.192	0.294984
IGBP1	1.42669e-05	-0.676146	0.455	0.525	0.304612
COPE	1.43157e-05	-0.486092	0.92	0.788	0.305655
ZNFX1	1.44172e-05	-0.425818	0.115	0.242	0.307821
SERPINI1	1.45083e-05	0.151949	0.219	0.03	0.309766
DNM1L	1.46097e-05	0.0262523	0.305	0.081	0.311931
VPS35L	1.48781e-05	-0.394385	0.042	0.131	0.317662
SLC39A11	1.51643e-05	0.144534	0.286	0.071	0.323772
DLEU2	1.53156e-05	-0.396292	0.037	0.121	0.327004
IL10RA	1.54525e-05	-0.132831	0.43	0.162	0.329925
RPRD1B	1.5487e-05	0.152441	0.161	0	0.330664
CPT1A	1.55457e-05	-0.0857872	0.338	0.101	0.331916
UBXN1	1.56184e-05	-0.856396	0.611	0.616	0.333469
ENTPD6	1.56594e-05	0.157357	0.254	0.051	0.334344
IGKV1-12	1.58239e-05	1.9493	0.217	0.03	0.337856
DNAJC9	1.58376e-05	0.230331	0.278	0.071	0.338149
PPA1	1.58833e-05	-0.749583	0.719	0.707	0.339124
BACH1	1.62337e-05	0.0697811	0.333	0.101	0.346606
TMEM41B	1.63954e-05	-0.237035	0.372	0.121	0.350059
CRYL1	1.68287e-05	-0.525759	0.073	0.182	0.35931
SLC16A7	1.68707e-05	-0.0296214	0.266	0.061	0.360205
DERL2	1.69586e-05	0.20929	0.788	0.434	0.362084
C1orf123	1.70854e-05	0.169086	0.209	0.03	0.364791
APOL1	1.71333e-05	0.0981299	0.286	0.071	0.365813
FAM208A	1.72166e-05	0.155277	0.16	0	0.367592
TMED10	1.73133e-05	0.375191	0.951	0.768	0.369657
DDX18	1.73898e-05	0.172373	0.597	0.293	0.37129
IMP3	1.74837e-05	-0.676672	0.438	0.505	0.373294
FAM53C	1.76153e-05	0.173193	0.216	0.03	0.376105
HIST2H2AA4	1.76732e-05	0.198476	0.227	0.04	0.37734
ADIPOR2	1.77833e-05	0.154455	0.234	0.04	0.379692
SNIP1	1.78349e-05	0.104456	0.299	0.081	0.380792
DAPP1	1.7855e-05	0.163671	0.28	0.071	0.381222
FAF2	1.79024e-05	0.177869	0.361	0.121	0.382233
VAMP1	1.82242e-05	0.167402	0.25	0.051	0.389104
RAP1B	1.82815e-05	-0.75021	0.673	0.646	0.390328
MTRES1	1.84784e-05	-0.162489	0.027	0.101	0.394532
VPS26C	1.88653e-05	-0.189827	0.043	0.131	0.402792
ZRANB2	1.9008e-05	0.07072	0.736	0.374	0.405839
PNN	1.91263e-05	0.0574361	0.698	0.333	0.408366
C4orf3	1.92085e-05	-0.712919	0.703	0.687	0.41012
TOP1	1.95204e-05	0.189296	0.826	0.465	0.41678
S100A11	1.97021e-05	-1.13571	0.435	0.535	0.420659
LINC02245	2.00389e-05	-0.178835	0.032	0.111	0.427851
FEN1	2.09447e-05	0.24652	0.306	0.091	0.44719
ZNF841	2.09691e-05	0.153415	0.247	0.051	0.447711
SRGN	2.11319e-05	-0.396502	0.973	0.889	0.451187
RPUSD1	2.12735e-05	0.141429	0.193	0.02	0.45421
SLC17A9	2.15086e-05	0.194891	0.536	0.242	0.45923
CYP51A1	2.16916e-05	0.125189	0.348	0.111	0.463137
MPZL1	2.19605e-05	0.137235	0.258	0.061	0.468879
CAPG	2.2662e-05	-0.552528	0.145	0.273	0.483857
G3BP2	2.291e-05	-0.0261207	0.578	0.253	0.489151
JUN	2.36061e-05	-0.0155416	0.651	0.333	0.504014
OSTC	2.3874e-05	-0.513548	0.929	0.788	0.509734
ASNS	2.39677e-05	0.158672	0.225	0.04	0.511735
RHOB	2.40761e-05	0.49463	0.499	0.242	0.514049
FBL	2.44812e-05	-0.800658	0.513	0.556	0.522698
POGZ	2.46242e-05	0.153689	0.389	0.141	0.52575
ROMO1	2.47451e-05	0.430528	0.744	0.485	0.528334
CUTA	2.47993e-05	-0.657883	0.904	0.808	0.529489
KLF2	2.4921e-05	-1.00836	0.664	0.667	0.532088
HIF1A	2.55036e-05	0.0177055	0.339	0.101	0.544528
SNU13	2.55278e-05	-0.648821	0.737	0.697	0.545045
MT2A	2.66068e-05	-1.86861	0.242	0.384	0.568083
SERINC3	2.77579e-05	-0.0154498	0.538	0.232	0.592659
DYNC1H1	2.86575e-05	0.126901	0.548	0.253	0.611866
SNHG12	2.92088e-05	-0.224388	0.061	0.162	0.623637
ATP1B3	2.94416e-05	0.208855	0.676	0.364	0.628609
NDUFS8	2.96456e-05	-0.653255	0.73	0.677	0.632963
CIAO3	3.00409e-05	-0.15418	0.033	0.111	0.641403
C18orf8	3.02238e-05	0.16142	0.187	0.02	0.645309
UQCRB	3.11059e-05	-0.615374	0.787	0.778	0.664143
BTG1	3.17489e-05	-1.12629	0.671	0.616	0.67787
RPAP2	3.18534e-05	0.158423	0.188	0.02	0.680103
SREK1	3.18621e-05	0.0997423	0.495	0.212	0.680287
TMEM5	3.38884e-05	-0.0039024	0.19	0.02	0.723551
AC010642.2	3.38911e-05	-0.209086	0.062	0.162	0.72361
IDH3A	3.40261e-05	0.133883	0.38	0.131	0.726491
ATAD2	3.40354e-05	0.212714	0.217	0.04	0.72669
CNN2	3.45127e-05	-0.779029	0.645	0.657	0.73688
SLC9A9	3.45534e-05	0.156088	0.203	0.03	0.737749
HNRNPK	3.51498e-05	-0.606181	0.846	0.768	0.750483
HYOU1	3.57366e-05	0.302455	0.75	0.434	0.763013
SKP1	3.61648e-05	-0.927935	0.744	0.687	0.772154
GLRX	3.65728e-05	-0.821057	0.617	0.626	0.780867
CENPT	3.68368e-05	0.142146	0.372	0.131	0.786502
MMADHC	3.70176e-05	-0.581194	0.661	0.636	0.790363
NOP10	3.73194e-05	-0.603107	0.674	0.687	0.796807
DNAJC4	3.76486e-05	-0.718781	0.473	0.515	0.803836
BCLAF1	3.79918e-05	0.0859595	0.687	0.354	0.811162
PPAN	3.80661e-05	-0.320561	0.07	0.172	0.812749
RPS6KB1	3.81092e-05	0.148487	0.167	0.01	0.813669
PSMB3	3.86502e-05	-0.66998	0.785	0.737	0.825221
EMC10	3.8994e-05	0.101545	0.734	0.404	0.832561
CSNK1D	3.89991e-05	-0.0253779	0.321	0.101	0.83267
WDR43	3.92428e-05	0.0815297	0.355	0.121	0.837874
PNRC1	3.95286e-05	-0.846669	0.636	0.636	0.843975
NPIPB12	3.97439e-05	-0.204054	0.051	0.141	0.848572
2025-03-06	4.00411e-05	-0.0094663	0.44	0.172	0.854917
PLIN2	4.01288e-05	0.150953	0.25	0.061	0.856789
STAT1	4.0326e-05	-0.130978	0.508	0.222	0.861001
PELI1	4.06015e-05	0.0425096	0.637	0.333	0.866882
SSR4	4.07094e-05	-0.527669	0.984	0.909	0.869186
CLEC2B	4.09326e-05	0.05717	0.567	0.283	0.873952
MUL1	4.10864e-05	0.116793	0.252	0.061	0.877235
ATP5ME	4.11573e-05	-0.432302	0.179	0.343	0.87875
SEL1L3	4.24151e-05	0.276551	0.855	0.556	0.905605
RFC1	4.2427e-05	0.225169	0.593	0.293	0.90586
NDUFA7	4.28464e-05	-0.787878	0.453	0.525	0.914814
ACADVL	4.31775e-05	0.203152	0.858	0.535	0.921884
EIF1AY	4.35865e-05	0.0908277	0.469	0.192	0.930616
ILVBL	4.36475e-05	0.0918645	0.313	0.091	0.931918
HIST1H2BC	4.41885e-05	0.109591	0.271	0.071	0.943468
CBX4	4.47263e-05	0.134377	0.203	0.03	0.954951
COMMD3	4.47607e-05	-0.998012	0.556	0.545	0.955685
COX7C	4.58971e-05	-0.493441	0.837	0.818	0.979948
FAM103A1	4.61277e-05	0.120991	0.2	0.03	0.984873
RPAIN	4.61668e-05	0.183847	0.214	0.04	0.985708
OGDH	4.61726e-05	0.00921294	0.423	0.162	0.985832
WRB	4.64121e-05	0.128971	0.18	0.02	0.990944
RIPOR2	4.66679e-05	-0.800498	0.377	0.475	0.996407
PSMA7	4.68604e-05	-0.707428	0.757	0.697	1
ARHGAP11B	4.72995e-05	0.135809	0.145	0	1
LAPTM4A	4.98489e-05	-0.183109	0.664	0.313	1
ACP2	5.0443e-05	0.114177	0.354	0.121	1
BLOC1S6	5.05615e-05	-0.171473	0.404	0.152	1
GABPB1-AS1	5.08631e-05	-0.389014	0.039	0.121	1
BRCC3	5.17012e-05	0.143921	0.235	0.051	1
COMMD6	5.28127e-05	-0.84464	0.587	0.636	1
UBE4A	5.3586e-05	0.0497065	0.419	0.172	1
TM9SF3	5.49303e-05	0.196327	0.515	0.232	1
MRPL53	5.4942e-05	0.128413	0.233	0.051	1
AC106897.1	5.50107e-05	-0.231661	0.04	0.121	1
BRI3BP	5.52163e-05	0.0655803	0.332	0.111	1
SNHG30	5.53485e-05	-0.28221	0.04	0.121	1
MIS18BP1	5.55095e-05	0.108838	0.551	0.253	1
SEC63	5.56422e-05	0.0465799	0.786	0.444	1
ALDH1L2	5.57345e-05	0.171393	0.197	0.03	1
HACD3	5.60176e-05	-0.00880246	0.303	0.091	1
NDUFV2	5.6263e-05	-0.640071	0.806	0.717	1
HIST1H2AI	5.68339e-05	0.333666	0.192	0.03	1
UBE2V1	5.68829e-05	-0.843482	0.569	0.576	1
TMEM214	5.73446e-05	0.0436239	0.576	0.273	1
MAP2K4	5.87334e-05	0.131654	0.199	0.03	1
DCTN4	5.88525e-05	0.0344991	0.288	0.081	1
CENPE	5.90598e-05	0.249891	0.176	0.02	1
RNF103	5.96395e-05	0.138262	0.161	0.01	1
AP3B1	5.99416e-05	-0.0134952	0.478	0.202	1
ELF2	6.01385e-05	-0.0419223	0.392	0.141	1
FAM129A	6.0626e-05	0.193209	0.194	0.03	1
HEIH	6.07654e-05	-0.200949	0.052	0.141	1
TOR1AIP1	6.12118e-05	0.066796	0.322	0.101	1
SYVN1	6.12609e-05	0.251185	0.778	0.475	1
SF3B6	6.16517e-05	-0.840742	0.615	0.626	1
TIMD4	6.22604e-05	0.156858	0.141	0	1
SHCBP1	6.2811e-05	0.188149	0.259	0.071	1
AFF4	6.29784e-05	-0.186648	0.487	0.202	1
ELMOD2	6.30118e-05	0.145273	0.297	0.091	1
ENTPD4	6.30343e-05	0.0572008	0.498	0.222	1
WDR1	6.37618e-05	-0.927969	0.591	0.606	1
SEC14L1	6.39199e-05	0.125601	0.809	0.495	1
CD48	6.43462e-05	-0.856539	0.74	0.707	1
IGHV4-34	6.50038e-05	1.45276	0.179	0.02	1
CD46	6.51747e-05	-0.139279	0.489	0.202	1
SCO2.1	6.51945e-05	0.119276	0.159	0.01	1
HIST1H2AC	6.55705e-05	0.147669	0.362	0.141	1
TOR2A	6.62569e-05	0.080026	0.38	0.141	1
TRAM2	6.6369e-05	0.0401416	0.498	0.222	1
ERN1	6.65474e-05	0.0868942	0.772	0.424	1
FGD5-AS1	6.7036e-05	-0.465685	0.03	0.101	1
GOLGA8A	6.89896e-05	0.143846	0.14	0	1
CXCR4	6.93247e-05	-0.103231	0.39	0.152	1
DSCR3	6.93908e-05	0.141434	0.174	0.02	1
GLA	6.97018e-05	-0.00416176	0.36	0.131	1
BOLA2-SMG1P6	7.00979e-05	0.136665	0.193	0.03	1
MEF2B	7.07279e-05	0.157115	0.195	0.03	1
HIGD2A	7.16163e-05	-0.538866	0.71	0.687	1
CDC42	7.17282e-05	-0.764507	0.758	0.727	1
ZNF292	7.19594e-05	0.0044084	0.534	0.232	1
TMED7	7.22595e-05	-0.585549	0.173	0.293	1
IGHJ4	7.29342e-05	0.248751	0.189	0.03	1
RNPC3	7.33505e-05	0.096474	0.282	0.081	1
ERICH1	7.52438e-05	-0.0502733	0.353	0.121	1
ASPM	7.55476e-05	0.299599	0.205	0.04	1
ETFDH	7.5719e-05	0.0822649	0.264	0.071	1
FLNA	7.58623e-05	-0.838346	0.57	0.606	1
TMEM87A	7.58988e-05	0.0413195	0.515	0.232	1
RPRD2	7.64029e-05	0.129899	0.158	0.01	1
AC026202.2	7.65778e-05	-0.1383	0.03	0.101	1
RGS1	7.70155e-05	0.264494	0.156	0.01	1
DAXX	7.70579e-05	-0.888191	0.317	0.404	1
MGAT1	7.72913e-05	-0.0277017	0.819	0.485	1
CFAP298	7.79812e-05	-0.233571	0.078	0.182	1
HIGD1A	7.84001e-05	0.0496836	0.322	0.111	1
CUL2	7.98534e-05	0.072033	0.195	0.03	1
JMJD1C	8.13766e-05	0.0867868	0.345	0.121	1
FAM45A	8.1454e-05	0.137118	0.174	0.02	1
IGLV1-51	8.191e-05	1.02527	0.241	0.061	1
TMEM30A	8.30314e-05	-0.141238	0.567	0.263	1
RMC1	8.32579e-05	-0.258789	0.047	0.131	1
IGHV7-4-1	8.41205e-05	2.43917	0.173	0.02	1
SFXN1	8.48945e-05	-0.112925	0.435	0.182	1
ECE1	8.58692e-05	0.131769	0.399	0.162	1
BLOC1S1	8.64331e-05	-0.737069	0.392	0.475	1
GPR25	8.74071e-05	-0.335329	0.058	0.152	1
ATXN2L	8.80286e-05	-0.176421	0.424	0.162	1
MRPL23	8.81877e-05	0.173922	0.313	0.111	1
ANKRD28	9.04526e-05	0.00224561	0.492	0.212	1
RPUSD4	9.06051e-05	0.11026	0.136	0	1
RHBDD2	9.08397e-05	0.151158	0.407	0.162	1
FKBP8	9.15211e-05	-0.728964	0.757	0.677	1
ANKRD37	9.16279e-05	-0.29984	0.095	0.202	1
MEF2D	9.30258e-05	0.106553	0.327	0.111	1
PRELID1	9.4113e-05	-0.834796	0.766	0.697	1
RALGAPA1	9.47825e-05	-0.0154583	0.281	0.081	1
ERH	9.51643e-05	-0.636223	0.724	0.667	1
C6orf89	9.5494e-05	0.0575425	0.511	0.232	1
NBAS	9.71481e-05	0.0304459	0.383	0.152	1
HIST1H3J	0.000100313	0.186561	0.134	0	1
FKBP11	0.000100656	0.259061	0.96	0.778	1
COG8	0.000103592	-0.226264	0.031	0.101	1
PBRM1	0.000104558	0.000377827	0.454	0.192	1
NT5C	0.000104706	-0.489435	0.508	0.556	1
TMX1	0.00010564	0.120842	0.597	0.303	1
GUK1	0.000107311	-0.524182	0.799	0.727	1
STX7	0.00010761	-0.723521	0.223	0.333	1
KDM5B	0.000107929	-0.0081106	0.226	0.051	1
VPS16	0.000108511	0.0126924	0.24	0.061	1
COPA	0.000110345	-0.0169149	0.662	0.323	1
FAM35A	0.000111037	0.113045	0.133	0	1
TOR1AIP2	0.000111819	0.137201	0.205	0.04	1
SLC35C1	0.000112413	0.124671	0.256	0.071	1
RBM38	0.000112773	0.162355	0.255	0.071	1
TRIM52-AS1	0.000114992	-0.195529	0.037	0.111	1
RALGPS2	0.000116031	-0.0629488	0.505	0.232	1
LINC01480	0.000117359	0.277705	0.311	0.111	1
TMEM131L	0.00011782	0.131903	0.152	0.01	1
C19orf53	0.00011877	-0.767109	0.626	0.657	1
LAG3	0.000118801	0.493969	0.132	0	1
DDHD1	0.000119255	0.0790659	0.323	0.111	1
CHPF2	0.000119294	-0.111336	0.403	0.162	1
FAM208B	0.000119301	0.156906	0.199	0.04	1
HLA-G	0.000120288	0.118524	0.151	0.01	1
LEMD3	0.000120613	0.0860416	0.311	0.111	1
BABAM1	0.000121299	-0.71842	0.329	0.414	1
CD79B	0.000121445	-0.00843334	0.791	0.465	1
HEXB	0.000121772	-0.144858	0.573	0.283	1
TSPO	0.000122216	-0.871845	0.528	0.556	1
ING3	0.000123297	0.0332898	0.3	0.101	1
STAG2	0.000124866	-0.0202264	0.387	0.152	1
GANAB	0.000125771	0.057794	0.694	0.384	1
ALG5	0.000125864	0.181809	0.822	0.505	1
APMAP	0.000126029	0.00304655	0.595	0.293	1
CD44	0.000126037	-0.960928	0.681	0.646	1
YWHAQ	0.000126686	-0.625873	0.651	0.626	1
IGLV3-19	0.000129879	0.708682	0.15	0.01	1
HIST1H1C	0.000129905	0.212173	0.682	0.374	1
IARS2	0.00013122	0.0236933	0.402	0.162	1
ATP6V0A1	0.000131451	0.145648	0.287	0.091	1
CELF1	0.000132682	0.146296	0.33	0.121	1
TPST2	0.000133737	0.0911202	0.737	0.424	1
FBXO3	0.000133965	0.0593457	0.276	0.081	1
ILF3-AS1	0.000136181	0.123754	0.149	0.01	1
PLCG2	0.000136511	0.005843	0.581	0.273	1
MIA2	0.000136946	-0.437997	0.049	0.131	1
RSL24D1	0.000137301	-0.746324	0.526	0.545	1
CCDC186	0.000138358	0.0920278	0.43	0.182	1
OXCT2	0.000140879	-0.225842	0.09	0.192	1
AC137767.1	0.00014089	0.118414	0.147	0.01	1
DNPH1	0.000141491	-0.663679	0.45	0.505	1
ESF1	0.000141491	0.146351	0.23	0.061	1
DIDO1	0.000142431	0.10341	0.273	0.081	1
RAMAC	0.000143796	-0.276548	0.056	0.141	1
TOMM7	0.000145398	-0.782996	0.729	0.737	1
ARFGEF2	0.000147466	0.102024	0.238	0.061	1
ATG2A	0.000148288	0.168092	0.228	0.061	1
TCF19	0.000149225	0.0439033	0.222	0.051	1
SDF4	0.000150015	0.224391	0.888	0.596	1
HIST1H2AL	0.000151085	0.196704	0.163	0.02	1
CEP152	0.000151334	0.118449	0.148	0.01	1
IKBIP	0.000153155	-0.0665376	0.517	0.253	1
ILRUN	0.000153408	-0.236949	0.049	0.131	1
HIST1H2BK	0.000154163	0.158887	0.28	0.091	1
DUSP1	0.000155301	-0.424573	0.344	0.121	1
RC3H1	0.000155862	-0.165931	0.434	0.182	1
CASP8	0.000158644	0.175036	0.491	0.232	1
ITGAE	0.000158958	-0.717356	0.392	0.465	1
TMEM175	0.000159407	0.0871575	0.365	0.141	1
HIST1H4B	0.000160834	0.203003	0.127	0	1
STK38L	0.000162755	-0.502908	0.153	0.263	1
JUNB	0.000162768	-0.388034	0.629	0.313	1
U2AF1	0.000163481	0.185504	0.244	0.071	1
LINC02362	0.000165609	-0.0759679	0.237	0.061	1
NUP107	0.000166936	0.148752	0.249	0.071	1
PLCL2	0.000167364	0.0775437	0.183	0.03	1
MYH9	0.000168263	-0.932059	0.644	0.616	1
LY96	0.000168939	0.0775893	0.335	0.121	1
ZNRD1	0.000169507	-0.554386	0.277	0.374	1
B3GAT3	0.000170593	-0.0301537	0.584	0.293	1
ERGIC1	0.000171378	0.0719899	0.635	0.323	1
PLD3	0.000171707	-0.0444824	0.704	0.354	1
PTP4A2	0.000171935	-0.816824	0.515	0.535	1
RFWD2	0.000172473	0.120872	0.144	0.01	1
CSE1L	0.000172503	0.111005	0.198	0.04	1
DHX9	0.000173012	0.124669	0.363	0.141	1
GFM1	0.000173029	0.111153	0.311	0.111	1
OXCT1	0.00017438	0.109345	0.399	0.182	1
CLSTN1	0.000175673	0.108319	0.315	0.111	1
SRPRB	0.000178168	0.0668596	0.827	0.455	1
UAP1	0.000178882	0.231812	0.649	0.364	1
SELL	0.000184048	-0.435455	0.652	0.343	1
CADM1	0.000184064	0.113072	0.376	0.162	1
RPTOR	0.000184361	0.0998553	0.145	0.01	1
CYB5R3	0.000184492	-0.124263	0.499	0.222	1
NR2C1	0.000187409	0.0958019	0.253	0.071	1
KLHL14	0.000189183	0.177093	0.316	0.121	1
HEATR1	0.000190188	0.131056	0.196	0.04	1
LRRFIP1	0.000191513	-0.847061	0.454	0.515	1
ATP13A1	0.000192319	0.0629103	0.639	0.343	1
SMC3	0.000192556	0.14165	0.414	0.182	1
FAM3C	0.000193196	0.0815404	0.644	0.343	1
ATP10D	0.000193511	0.121641	0.247	0.071	1
RHBDD1	0.000194602	0.0992471	0.268	0.081	1
SAP18	0.000195276	-0.70963	0.715	0.677	1
HIST1H2AH	0.000195763	0.246699	0.16	0.02	1
IGHV1-2	0.000196681	1.81605	0.162	0.02	1
MRPS5	0.000196998	0.11165	0.477	0.212	1
ZNF430	0.000199997	-0.0573555	0.32	0.111	1
CHCHD5	0.000200861	-0.713037	0.355	0.444	1
GOLGB1	0.00020201	0.159359	0.73	0.444	1
ALG9	0.000203744	-0.0122474	0.281	0.091	1
IGLV2-11	0.000203961	2.24961	0.162	0.02	1
ORC3	0.000206891	0.117349	0.213	0.051	1
PRKCSH	0.000207136	0.111912	0.807	0.475	1
OGFR	0.000207357	-0.110381	0.325	0.121	1
NUP85	0.000207497	0.120434	0.141	0.01	1
RANBP9	0.000207732	0.0976791	0.162	0.02	1
STIM1	0.00020774	0.140384	0.193	0.04	1
CCDC94	0.000209412	0.121102	0.158	0.02	1
DONSON	0.000209612	0.126183	0.177	0.03	1
ANXA2	0.00021278	-0.767104	0.822	0.727	1
CCNT2	0.000212966	-0.0316886	0.295	0.101	1
IGLC3	0.000214561	1.68025	0.442	0.253	1
MAGEH1	0.000215852	0.0468375	0.454	0.212	1
MLKL	0.000216248	0.0984968	0.215	0.051	1
IL2RG	0.000217455	0.154109	0.951	0.667	1
PIGF	0.000219373	0.0511662	0.398	0.162	1
LMTK2	0.000220915	-0.0167657	0.21	0.051	1
SRP54	0.000221104	0.193021	0.7	0.374	1
KHSRP	0.00022242	0.0961105	0.211	0.051	1
RPAP3	0.000222936	0.132287	0.173	0.03	1
IGHV6-1	0.000224656	-0.904265	0.32	0.131	1
EIF4EBP2	0.000226829	-0.623493	0.155	0.263	1
TMEM9	0.000226943	0.106959	0.367	0.141	1
AIM2	0.000227757	-0.361886	0.153	0.263	1
C7orf49	0.000228683	0.112348	0.14	0.01	1
CD69	0.000231	0.212234	0.249	0.081	1
SKA3	0.000232287	0.112392	0.122	0	1
FO393401.1	0.000232557	-0.241306	0.033	0.101	1
DDX3Y	0.00023281	0.139667	0.262	0.081	1
ZNF593	0.00023392	-0.598862	0.467	0.515	1
NOMO2	0.000235819	0.0899855	0.538	0.273	1
CLEC2D	0.000236371	-0.0126538	0.577	0.303	1
THUMPD3-AS1	0.00023674	-0.392629	0.077	0.172	1
ATAD5	0.000241021	0.131975	0.177	0.03	1
CD2AP	0.000241318	0.127399	0.208	0.051	1
SUPT7L	0.000243136	0.0739519	0.326	0.121	1
TMC6	0.000244028	0.0561485	0.742	0.384	1
BIN2	0.000244382	-0.673028	0.438	0.525	1
TARSL2	0.000244764	-0.122194	0.379	0.152	1
TMEM43	0.0002452	0.154637	0.207	0.051	1
UBA6	0.000245885	-0.0208348	0.282	0.091	1
PIK3R5	0.00024864	0.0159548	0.495	0.232	1
PRPS1	0.000250255	0.108515	0.312	0.111	1
TMEM242	0.000252181	0.0781785	0.285	0.101	1
ARID5B	0.000252315	0.0939913	0.521	0.242	1
SLC25A12	0.000252389	0.111565	0.277	0.091	1
NOP56	0.000256617	-0.164158	0.449	0.202	1
HEXDC	0.000256655	0.115689	0.12	0	1
CDK11B	0.000257973	0.0386029	0.34	0.131	1
TSPAN13	0.000258317	0.103589	0.308	0.111	1
VKORC1L1	0.000261737	0.0958515	0.14	0.01	1
CTSB	0.000265127	-0.00281975	0.5	0.232	1
MFSD11	0.000266648	0.127625	0.438	0.192	1
SCAMP3	0.000266732	0.123366	0.666	0.343	1
CSK	0.000267138	-0.868898	0.461	0.505	1
UQCRC2	0.000270209	-0.785599	0.583	0.566	1
IPO9	0.000276794	-0.0679579	0.214	0.051	1
ERGIC2	0.000278471	0.0182968	0.727	0.404	1
ARID3A	0.000278826	0.0633671	0.413	0.182	1
PISD	0.000278885	0.124568	0.205	0.051	1
TMEM209	0.00028378	0.118617	0.225	0.061	1
ATP6V0E1	0.000284179	-0.562838	0.777	0.677	1
COX5B	0.000284352	-0.481238	0.815	0.758	1
ZBTB40	0.000285282	0.130014	0.136	0.01	1
DHFR	0.00028622	0.0945308	0.239	0.071	1
MRPS34	0.000286501	-0.747806	0.705	0.636	1
NKTR	0.000288255	0.00267915	0.554	0.273	1
SELENOW	0.000296889	-0.792589	0.38	0.455	1
SMPD4	0.000298455	0.127782	0.274	0.091	1
UTRN	0.000299012	-0.0194401	0.254	0.081	1
APC	0.000300329	0.0842079	0.21	0.051	1
EP300	0.00030167	-0.134339	0.327	0.121	1
LONP2	0.000301786	-0.119381	0.414	0.172	1
IGHGP	0.000302944	0.552849	0.118	0	1
SMIM27	0.000306365	0.0243116	0.225	0.061	1
H1FX	0.000307023	0.138785	0.636	0.364	1
CBWD1	0.000307429	0.138645	0.495	0.242	1
YTHDC2	0.000307537	0.129994	0.155	0.02	1
TOMM22	0.000309772	-0.705032	0.6	0.586	1
ABHD12	0.00031342	0.098976	0.446	0.202	1
NARS	0.000315096	0.124034	0.355	0.141	1
HIST1H3C	0.000319565	-0.360564	0.154	0.02	1
PARP9	0.000327401	0.105835	0.191	0.04	1
HIST1H2AG	0.000329537	0.298456	0.216	0.061	1
CCR10	0.000333655	-0.0626918	0.557	0.283	1
C3orf58	0.000334542	0.13379	0.116	0	1
MAP7D3	0.000335026	0.110725	0.207	0.051	1
LBR	0.000335114	0.148995	0.559	0.293	1
ZCCHC8	0.000336059	0.0682415	0.254	0.081	1
GBP5	0.000339806	0.215144	0.246	0.081	1
DDX52	0.000342228	-0.038068	0.256	0.081	1
SERPINB1	0.000343139	-0.239852	0.348	0.141	1
TKT	0.000344838	-0.727976	0.69	0.657	1
SYNGR2	0.00034566	-0.757172	0.848	0.717	1
BANK1	0.000348293	-0.414532	0.066	0.152	1
TM9SF1	0.000350661	0.0985233	0.573	0.273	1
IGHV3-33	0.000350784	4.44781	0.182	0.04	1
ANXA11	0.000353339	-0.863482	0.56	0.566	1
MOGS	0.000356105	0.121592	0.457	0.212	1
PFKP	0.000358469	0.109059	0.27	0.091	1
POLR2J3	0.000360136	-0.06396	0.405	0.172	1
COMTD1	0.000363997	-0.0159902	0.465	0.212	1
METTL3	0.000364384	0.0295165	0.244	0.071	1
PSMB10	0.000367544	-0.581682	0.721	0.667	1
NCAPG2	0.000368867	0.130143	0.169	0.03	1
NUDCD1	0.000370556	0.100451	0.134	0.01	1
TMEM206	0.000373243	0.116856	0.15	0.02	1
SQLE	0.000373784	0.0673238	0.273	0.091	1
SNHG9	0.000375434	-0.152546	0.289	0.101	1
SUPV3L1	0.000376422	0.105175	0.269	0.091	1
TIPARP	0.000380424	0.110722	0.184	0.04	1
IGHG4	0.000385397	0.0434285	0.309	0.121	1
SGK1	0.000385924	-0.0131456	0.383	0.162	1
ACTR1A	0.000387179	-0.137726	0.459	0.202	1
POMP	0.000388888	-0.58746	0.736	0.707	1
TNFSF10	0.000391192	0.00480246	0.359	0.152	1
MALAT1	0.000402826	0.310202	0.997	1	1
TRADD	0.000402942	-0.646397	0.514	0.525	1
PIGU	0.000405187	0.097312	0.187	0.04	1
POLR1D	0.000409291	-0.637775	0.563	0.566	1
PRPF4B	0.000410131	-0.225691	0.529	0.253	1
APH1A	0.000413274	-0.571513	0.525	0.525	1
VPS13C	0.000416115	-0.0225156	0.488	0.232	1
AC007952.4	0.000420862	0.0964596	0.256	0.081	1
PHACTR4	0.000422844	0.0338118	0.361	0.152	1
C12orf75	0.000423844	-0.990452	0.526	0.556	1
ARL5B	0.000424082	0.0347439	0.219	0.061	1
MBD2	0.000425493	0.0426796	0.23	0.071	1
ABCB8	0.000430019	0.137232	0.43	0.192	1
TMEM161B-AS1	0.000431999	-0.14193	0.035	0.101	1
TOMM20	0.000435849	-0.591376	0.684	0.626	1
SEMA4D	0.000435981	-0.0701526	0.305	0.111	1
HELLS	0.000437969	0.175743	0.261	0.091	1
SPARC	0.000438092	-0.0418485	0.151	0.02	1
ALDH18A1	0.000440153	-0.0455209	0.416	0.182	1
C6orf62	0.000444085	-0.0938066	0.255	0.081	1
YPEL3	0.000444604	-0.54398	0.358	0.434	1
KIF20B	0.000446387	0.0380068	0.29	0.111	1
SNHG17	0.000448514	-0.319319	0.047	0.121	1
PRC1	0.00045029	0.130997	0.2	0.051	1
TMEM208	0.000451305	0.214972	0.869	0.576	1
LNPEP	0.000452207	-0.158561	0.332	0.131	1
SMAD2	0.00045427	-0.557409	0.19	0.293	1
CDK5RAP1	0.00046263	0.115757	0.234	0.071	1
UGCG	0.000466543	0.0376942	0.251	0.081	1
FAM76B	0.000467207	0.0801106	0.168	0.03	1
OXA1L	0.000468746	-0.715688	0.733	0.657	1
PPM1B	0.000472918	0.0758846	0.283	0.101	1
CERS5	0.000475376	0.105955	0.202	0.051	1
MR1	0.000475696	0.0729771	0.235	0.071	1
IGF1	0.000475941	0.11677	0.485	0.242	1
GZMB	0.000477556	0.952315	0.27	0.101	1
DSTN	0.000479329	-0.682747	0.583	0.586	1
DENR	0.00048017	0.0518309	0.36	0.152	1
ZUFSP	0.000480512	0.103685	0.111	0	1
MARCKS	0.00048242	0.0646806	0.182	0.04	1
PKN2	0.000482825	-0.135597	0.284	0.101	1
BNIP1	0.000486517	0.0278658	0.186	0.04	1
UBE2G2	0.000492685	0.0887237	0.404	0.182	1
GPR180	0.000493669	0.083543	0.202	0.051	1
DCP1A	0.000498086	0.0735805	0.27	0.091	1
MBNL2	0.000498338	-0.0231635	0.527	0.263	1
GSTM2	0.000499043	-0.0838343	0.266	0.091	1
GRIPAP1	0.000500701	-0.0464029	0.251	0.081	1
SMC5	0.000502505	-0.0182851	0.327	0.131	1
SMPD1	0.000502993	0.0786549	0.302	0.111	1
RB1	0.000503702	0.0186608	0.555	0.263	1
TBC1D9B	0.000505707	0.0987342	0.227	0.071	1
MCM7	0.000508214	0.213179	0.284	0.111	1
NSUN6	0.000508564	0.0723969	0.182	0.04	1
ERLIN2	0.000509298	-0.0107028	0.182	0.04	1
CD180	0.000514717	0.110733	0.411	0.182	1
YIPF1	0.000516977	-0.0020018	0.314	0.121	1
POGLUT1	0.000517197	0.0486266	0.244	0.081	1
MON2	0.000517343	0.0307331	0.451	0.212	1
SLC31A1	0.000517489	0.100713	0.232	0.071	1
FANCF	0.000518744	-0.228737	0.089	0.182	1
HERC5	0.000522027	0.111171	0.214	0.061	1
MED17	0.00052311	0.0235025	0.301	0.111	1
EMC3	0.000525016	0.0425559	0.682	0.354	1
MYC	0.000525939	-0.670786	0.123	0.222	1
C20orf196	0.000526465	0.0894387	0.128	0.01	1
SAR1A	0.000527854	0.141511	0.609	0.323	1
MGST2	0.000531101	0.120756	0.163	0.03	1
VCAN	0.000531383	-0.728014	0.035	0.101	1
CSTB	0.0005341	-0.914107	0.569	0.566	1
DIAPH3	0.000537109	0.12532	0.128	0.01	1
ARSA	0.000537448	-0.0795918	0.713	0.364	1
TMBIM4	0.000539222	-0.595064	0.699	0.636	1
AC004922.1	0.000540974	0.103466	0.127	0.01	1
TOP2A	0.00054201	0.278903	0.192	0.051	1
HIST1H2AE	0.000544563	0.114124	0.195	0.051	1
RNF121	0.000548301	0.0993499	0.214	0.061	1
MKNK2	0.000551161	0.1198	0.387	0.172	1
DAZAP2	0.000552483	-0.763378	0.732	0.677	1
ITFG1	0.000556165	0.012628	0.57	0.283	1
MRPL20	0.000559215	-0.704438	0.61	0.586	1
WDR11	0.000561234	-0.0119728	0.213	0.061	1
CLPTM1	0.000562963	-0.0731556	0.571	0.293	1
SSBP3	0.000562995	0.136314	0.144	0.02	1
IGKV1-27	0.000566483	2.37238	0.128	0.01	1
EXOC4	0.000568852	0.0186869	0.441	0.202	1
MUT	0.000572699	0.0974246	0.126	0.01	1
NIPA2	0.000581293	0.0978387	0.484	0.232	1
MICU1	0.000581451	-0.181925	0.251	0.081	1
HNRNPA3	0.00058237	-0.730661	0.835	0.707	1
IFI35	0.000590737	0.0828641	0.609	0.313	1
FANCA	0.000591897	0.0924319	0.181	0.04	1
ABHD14B	0.000601331	-0.571674	0.367	0.424	1
ZBTB38	0.000603743	-0.796396	0.583	0.556	1
IGLV8-61	0.00060691	4.53708	0.142	0.02	1
NFAT5	0.000607105	0.0953735	0.196	0.051	1
POR	0.000607567	0.0999097	0.145	0.02	1
PKMYT1	0.000609068	0.176665	0.16	0.03	1
MUM1	0.000613947	0.0975234	0.125	0.01	1
C16orf87	0.000614688	0.0741334	0.355	0.152	1
TMEM39A	0.000627094	-0.0276126	0.377	0.162	1
B3GNT2	0.000627345	0.143813	0.289	0.111	1
LPCAT3	0.000636029	0.0822184	0.279	0.101	1
SLC35B2	0.000638253	0.0300229	0.429	0.192	1
BANF1	0.000642443	-0.754622	0.518	0.515	1
SPAST	0.000643676	0.103379	0.162	0.03	1
KANSL2	0.000646893	0.0364689	0.197	0.051	1
AL390728.5	0.000646969	0.0546101	0.244	0.081	1
TTF2	0.000649606	0.0729735	0.163	0.03	1
DMAC1	0.000649996	0.0615759	0.323	0.131	1
PCNP	0.000652934	-0.786918	0.423	0.465	1
STK17B	0.000653723	-0.0250586	0.728	0.414	1
TMEM107	0.00065519	0.00922036	0.369	0.162	1
IGHV3-21	0.000658153	1.83514	0.143	0.02	1
GNB2	0.000658251	-0.936591	0.605	0.606	1
LDLR	0.000659912	0.0818819	0.215	0.061	1
SLC39A9	0.000661612	0.0778179	0.242	0.081	1
APTX	0.00066414	0.0672993	0.279	0.101	1
ERLEC1	0.000668126	0.200709	0.923	0.687	1
TIMM44	0.000669004	0.0661382	0.307	0.121	1
IFI30	0.000670003	-0.818561	0.638	0.606	1
IGKV1D-39	0.000672622	-0.310025	0.083	0.182	1
SLC16A1	0.000673817	0.0895431	0.263	0.091	1
UFL1	0.000674141	-0.279287	0.583	0.293	1
DCTN6	0.000679747	0.0359796	0.233	0.071	1
C3orf38	0.000681583	0.0956384	0.231	0.071	1
HDAC6	0.000682313	-0.0566404	0.163	0.03	1
CTSZ	0.000686489	-0.0343743	0.624	0.343	1
HBS1L	0.000687591	-0.0770194	0.49	0.232	1
BTAF1	0.000687959	0.0253802	0.475	0.222	1
CANT1	0.000688028	0.0779216	0.243	0.081	1
AC016745.2	0.000688391	0.0906485	0.105	0	1
MXD4	0.000690916	0.156852	0.317	0.131	1
CCT8	0.000691273	-0.615127	0.74	0.646	1
ATXN1	0.000699552	0.0589066	0.359	0.162	1
ETNK1	0.0006996	0.079406	0.48	0.222	1
LEO1	0.000708511	0.0204247	0.16	0.03	1
NUP58	0.000710701	-0.267146	0.31	0.121	1
PMF1	0.000710994	-0.264466	0.14	0.242	1
FAM168B	0.000716256	0.105036	0.193	0.051	1
ALKBH5	0.000721573	-0.485589	0.229	0.323	1
TMEM135	0.000722066	0.0896602	0.178	0.04	1
UBR2	0.000723071	-0.0992356	0.516	0.253	1
HSD17B12	0.000725519	0.120688	0.432	0.212	1
AAED1	0.00072744	0.103319	0.122	0.01	1
SGSM3	0.000728678	0.102889	0.341	0.141	1
TFRC	0.000731213	0.018922	0.337	0.141	1
MKLN1	0.000744113	0.0587157	0.291	0.111	1
IMPAD1	0.000747222	0.0850639	0.308	0.121	1
SCO2	0.000748848	-0.360357	0.098	0.192	1
GUSB	0.000749835	0.0648378	0.716	0.414	1
PRDM15	0.000752375	0.0843277	0.16	0.03	1
MCTP2	0.00075674	0.0128728	0.281	0.101	1
PRPF39	0.000760122	-0.0388364	0.237	0.081	1
GBA	0.00076748	-0.0490522	0.387	0.172	1
MTMR9	0.000769216	0.0869739	0.123	0.01	1
C12orf4	0.000770971	0.0728194	0.16	0.03	1
SRSF5	0.000776809	-0.819118	0.769	0.697	1
SMC2	0.000778434	0.12036	0.257	0.091	1
SLC39A8	0.000787084	-0.0442985	0.299	0.111	1
RELB	0.000788128	-0.0521293	0.474	0.232	1
RAD9A	0.00079207	0.0745742	0.302	0.121	1
IGHV2-5	0.000797869	1.04373	0.191	0.051	1
DDX27	0.000798019	-0.0774434	0.347	0.141	1
RTN3	0.000798412	-0.0124221	0.656	0.364	1
RASSF1	0.000801754	0.0818616	0.323	0.131	1
OTUD6B-AS1	0.000806948	-0.290982	0.078	0.162	1
CORO1C	0.000808715	0.0340206	0.211	0.061	1
HIST1H2BH	0.000811854	0.0778404	0.176	0.04	1
LINC02001	0.00083414	-0.0341385	0.122	0.01	1
IGLV1-44	0.000838847	0.0974201	0.299	0.121	1
IGLV3-21	0.000841992	0.717521	0.186	0.051	1
PFDN1	0.000843812	0.0271713	0.429	0.202	1
B4GALT4	0.000844943	0.0743402	0.228	0.071	1
ELP5	0.000846529	0.0673669	0.322	0.131	1
HIST1H3B	0.000851272	0.212325	0.155	0.03	1
FCGR2B	0.000851458	-0.109769	0.49	0.232	1
SEC23IP	0.000852292	0.0650176	0.256	0.091	1
LAX1	0.000852921	-0.0326199	0.352	0.152	1
AC245014.3	0.000853149	0.0669645	0.313	0.131	1
UTP3	0.000853697	0.0603105	0.258	0.091	1
UBL7	0.000856062	-0.771987	0.399	0.434	1
MAN2C1	0.000856236	0.0948027	0.209	0.061	1
CDC42SE1	0.000860889	-0.557981	0.396	0.455	1
PSMD14	0.000863815	0.0749035	0.522	0.263	1
BOD1L1	0.000864056	-0.0547588	0.369	0.162	1
FARSB	0.00088594	0.0933934	0.304	0.121	1
ABCD3	0.000887385	0.0945682	0.14	0.02	1
PLSCR3	0.000890315	-0.806223	0.209	0.303	1
MPLKIP	0.000898248	-0.514942	0.284	0.364	1
ABCD4	0.00090323	0.0887994	0.191	0.051	1
JAK3	0.000904789	-0.0662817	0.293	0.111	1
CLSPN	0.000907296	0.170328	0.185	0.051	1
SNRPN	0.000908993	0.0913856	0.44	0.212	1
IGHMBP2	0.000910277	0.0950426	0.12	0.01	1
RTN4	0.000912634	-0.173308	0.537	0.263	1
SDE2	0.00092043	0.103856	0.273	0.101	1
HIST1H4J	0.000921102	0.0896872	0.12	0.01	1
LINC01484	0.00092211	0.0880663	0.101	0	1
SS18L2	0.000923629	-0.648319	0.375	0.424	1
GTF3C1	0.000925656	0.0695352	0.302	0.121	1
LRRC8C	0.000929216	0.113397	0.171	0.04	1
TERF1	0.000929444	0.104724	0.284	0.111	1
SCAMP1	0.000929936	0.0574942	0.192	0.051	1
SLC25A36	0.000930429	0.0260458	0.356	0.152	1
MDH2	0.000932713	-0.612267	0.723	0.646	1
AGA	0.000939381	0.0451413	0.527	0.263	1
CD99L2	0.000951974	0.0203812	0.242	0.081	1
ALCAM	0.000952454	0.105988	0.233	0.081	1
CZIB	0.000959355	-0.344047	0.063	0.141	1
NARFL	0.000964627	0.10103	0.134	0.02	1
CHMP4B	0.000975634	-0.614784	0.539	0.525	1
C6orf48	0.000975693	0.12492	0.136	0.02	1
ABCA1	0.000983784	0.116955	0.1	0	1
GCN1	0.000984163	0.0960606	0.29	0.111	1
APOO	0.000985891	0.0792642	0.222	0.071	1
NDEL1	0.000987058	0.10753	0.235	0.081	1
ESR1	0.000990018	0.084521	0.138	0.02	1
CDYL	0.000990573	0.102791	0.137	0.02	1
AGL	0.000991561	0.107138	0.136	0.02	1
TECR	0.00100199	0.0536524	0.911	0.626	1
GOLGA2	0.00102334	-0.0941466	0.388	0.172	1
BAZ2A	0.00102724	0.00173388	0.583	0.313	1
SLC35F2	0.00102744	0.100991	0.266	0.101	1
IREB2	0.00103647	0.0140682	0.258	0.091	1
ODF3B	0.00103882	-0.0755913	0.349	0.152	1
NDUFB10	0.00104688	-0.667144	0.747	0.677	1
COX7B	0.00104924	-0.455123	0.739	0.747	1
IGHV4-59	0.00104929	2.523	0.196	0.061	1
PCYOX1	0.00105109	0.041059	0.189	0.051	1
ZNF33B	0.00105599	-0.280304	0.064	0.141	1
LNPK	0.00105758	0.0675472	0.168	0.04	1
EIF4A3	0.00106258	0.098266	0.403	0.202	1
ICAM1	0.00106325	0.0986007	0.153	0.03	1
SHLD1	0.00106469	-0.169196	0.044	0.111	1
S1PR4	0.00106925	-0.599614	0.334	0.414	1
RAF1	0.00107098	0.00634091	0.433	0.202	1
MAN1B1	0.00107141	0.0949646	0.312	0.131	1
ST6GAL1	0.00107409	-0.0498896	0.627	0.333	1
TRIR	0.00109182	-0.487286	0.699	0.636	1
SARS2	0.00110105	0.0558706	0.236	0.081	1
AP2A1	0.00110629	0.0115749	0.3	0.121	1
LSR	0.00110898	-0.00847056	0.408	0.192	1
IFI44	0.00110942	-0.163077	0.155	0.03	1
MED23	0.00111315	-0.0920451	0.22	0.071	1
RPP25L	0.00111925	0.0806814	0.117	0.01	1
MTHFD2	0.00111952	-0.622755	0.539	0.556	1
AP2A2	0.00112421	0.0823418	0.171	0.04	1
SLC30A7	0.00113763	-0.166795	0.42	0.202	1
UBXN7	0.00114031	-0.110466	0.221	0.071	1
XRRA1	0.00114751	0.0767807	0.222	0.071	1
CDK1	0.00115242	0.123164	0.169	0.04	1
ZZZ3	0.0011566	0.104543	0.151	0.03	1
METAP2	0.00115734	-0.0583738	0.48	0.232	1
NET1	0.00115944	0.11559	0.308	0.131	1
VPS13A	0.00116085	0.00893843	0.329	0.141	1
KIAA0391	0.00116361	0.106791	0.116	0.01	1
SIPA1L3	0.00118355	0.0648599	0.153	0.03	1
CSRNP1	0.00118743	0.0793091	0.233	0.081	1
DRAM1	0.00118949	-0.0148033	0.248	0.091	1
SPAG5	0.00121167	0.0907712	0.116	0.01	1
COPB1	0.00122247	-0.142271	0.606	0.313	1
TBP	0.00122439	0.0920733	0.184	0.051	1
HAUS2	0.0012273	0.0819115	0.245	0.091	1
LRBA	0.00123533	0.0559099	0.365	0.162	1
GPR89A	0.00123761	0.0684225	0.278	0.111	1
KLC1	0.0012412	0.0872148	0.262	0.101	1
MEX3C	0.00124433	0.104237	0.134	0.02	1
CRIP1	0.00124531	-0.337687	0.813	0.859	1
PDCD2	0.00124559	-0.637638	0.443	0.465	1
IFRD1	0.00124845	0.0996517	0.313	0.131	1
WDR33	0.00125178	-0.139097	0.545	0.273	1
SLC25A20	0.00125195	0.0445745	0.254	0.091	1
NDUFAB1	0.00127201	-0.53046	0.676	0.646	1
CENPM	0.00127325	0.149423	0.24	0.091	1
TVP23B	0.00127929	-0.051422	0.295	0.121	1
ENTPD1	0.0012817	0.107775	0.71	0.414	1
TRAPPC6A	0.00128306	-0.609326	0.327	0.394	1
VCP	0.00128761	-0.563291	0.871	0.747	1
GTF3C6	0.00129144	-0.631896	0.55	0.566	1
HPGD	0.00130205	-0.310539	0.108	0.202	1
TAOK1	0.00130274	-0.0257002	0.167	0.04	1
ATPAF2	0.00130315	0.0974491	0.151	0.03	1
TBC1D23	0.00130395	-0.0967822	0.288	0.111	1
MRPL47	0.00130428	0.00110704	0.435	0.212	1
COX20	0.0013055	0.11214	0.333	0.152	1
DUS1L	0.00131135	-0.103047	0.231	0.081	1
GLG1	0.00132216	-0.102681	0.759	0.444	1
PARPBP	0.00132488	0.081023	0.151	0.03	1
GSPT1	0.0013257	-0.739498	0.488	0.495	1
RPS6KA5	0.00132865	0.104256	0.131	0.02	1
PITRM1	0.00132962	-0.0207572	0.219	0.071	1
ZC3H11A	0.00133116	0.0340166	0.216	0.071	1
SIAE	0.00133507	0.0798964	0.115	0.01	1
HEXA	0.00133998	0.0483867	0.661	0.364	1
NOL8	0.00134133	0.0428817	0.282	0.111	1
NDUFS1	0.00134516	-0.142841	0.338	0.141	1
TBC1D14	0.00135	0.0958221	0.249	0.091	1
TMED9	0.00135263	0.217376	0.951	0.758	1
PIGG	0.00136909	0.103431	0.2	0.061	1
GDI2	0.00137234	-0.650932	0.633	0.586	1
ALG11	0.00137385	0.0878852	0.218	0.071	1
RGS2	0.00137658	0.00722725	0.181	0.051	1
MXD1	0.00137852	0.0677676	0.184	0.051	1
LSM7	0.00138234	-0.700465	0.713	0.667	1
TNRC6A	0.00138529	-0.0461417	0.249	0.091	1
EXOC6	0.00138683	0.0498221	0.232	0.081	1
ARHGAP11A	0.0013871	0.0992381	0.149	0.03	1
ATP7A	0.00138862	0.0936809	0.131	0.02	1
IGHV4-39	0.00139541	2.83204	0.221	0.081	1
ZNF281	0.00140199	0.0711946	0.217	0.071	1
ECPAS	0.00140252	-0.271149	0.051	0.121	1
CNOT4	0.00140718	0.0330673	0.297	0.131	1
TRG-AS1	0.00140754	-0.512449	0.039	0.101	1
PHGDH	0.00140836	0.119593	0.304	0.131	1
M6PR	0.00140944	-0.0695057	0.699	0.404	1
TTC13	0.00141047	0.0968805	0.234	0.081	1
MAT2B	0.00142277	-0.667859	0.407	0.444	1
MATR3.1	0.00142718	-0.118307	0.57	0.293	1
ANXA6	0.00143505	-0.697793	0.77	0.657	1
TMEM184C	0.00143711	0.0700253	0.132	0.02	1
NSD1	0.00144025	-0.22844	0.497	0.253	1
DDX21	0.00144637	0.120912	0.554	0.303	1
CTSS	0.00145636	-0.265041	0.762	0.424	1
EXOSC10	0.00146058	0.105838	0.278	0.111	1
CEP135	0.00146064	0.101902	0.148	0.03	1
CAMK2D	0.00146337	0.0991495	0.131	0.02	1
DCPS	0.0014649	-0.539102	0.649	0.586	1
HIST1H3H	0.00147759	0.098895	0.113	0.01	1
DLG1	0.00147914	0.106067	0.291	0.121	1
MPDU1	0.00148043	0.102652	0.552	0.303	1
TKFC	0.00148639	0.0323995	0.201	0.061	1
PSMA5	0.00148656	-0.539763	0.697	0.636	1
IGLV3-25	0.00148704	-0.495866	0.166	0.04	1
GTSF1	0.0014871	-0.435058	0.088	0.172	1
STT3A	0.00149214	0.17312	0.805	0.535	1
CYTOR	0.00149274	-0.205848	0.729	0.444	1
HDAC7	0.00151197	0.0467434	0.465	0.232	1
BCL7A	0.00151334	0.0820832	0.198	0.061	1
RAB28	0.00151758	0.0861856	0.147	0.03	1
ANKRD11	0.00151856	-0.191659	0.442	0.212	1
G6PC3	0.00152725	0.0719088	0.471	0.232	1
WDR83OS	0.00153045	-0.483964	0.858	0.747	1
ZFC3H1	0.00153341	0.00789555	0.384	0.182	1
CCDC32	0.00153563	-0.684999	0.516	0.515	1
FAR1	0.00153929	0.0986545	0.227	0.081	1
NDUFB7	0.00153969	-0.441847	0.788	0.707	1
TCEA1	0.001554	-0.549411	0.736	0.677	1
BUB1B	0.00157391	0.091862	0.13	0.02	1
ZNF107	0.00157768	0.0300309	0.231	0.081	1
TRIM52	0.00158497	0.107821	0.165	0.04	1
GMDS-AS1	0.00159957	0.0888267	0.165	0.04	1
MGAT4A	0.00160334	-0.37521	0.153	0.253	1
RTRAF	0.00160398	-0.599266	0.692	0.626	1
ATP5S	0.00160546	0.0987203	0.145	0.03	1
EBP	0.00160802	0.041717	0.489	0.263	1
ELK3	0.00161562	-0.357031	0.114	0.202	1
INSIG2	0.00161605	0.0962826	0.23	0.081	1
POU2F1	0.00161936	0.0253187	0.299	0.121	1
LDHA	0.00162369	-0.51834	0.814	0.768	1
ZNF92	0.00162695	-0.00424265	0.308	0.131	1
DDB1	0.00163526	-0.0930176	0.551	0.283	1
RUBCN	0.00163707	0.100176	0.238	0.091	1
NDFIP2	0.00163732	0.0770602	0.164	0.04	1
LETM1	0.00163764	-0.04312	0.248	0.091	1
CTSA	0.00164755	-0.11911	0.607	0.333	1
DCTN3	0.00165197	-0.610396	0.567	0.545	1
SNRPG	0.00165657	-0.597261	0.666	0.646	1
SIGIRR	0.00166728	-0.716825	0.159	0.253	1
HIST1H2BJ	0.00167248	0.0654201	0.209	0.071	1
NUP155	0.00167824	0.113685	0.194	0.061	1
ANLN	0.00168805	0.137609	0.142	0.03	1
PTP4A3	0.00169588	0.17829	0.145	0.03	1
SLIRP	0.00169704	0.0569946	0.573	0.333	1
VEZT	0.00170212	-0.185736	0.269	0.101	1
USP24	0.0017095	0.0890819	0.111	0.01	1
USP12	0.00171355	0.0574665	0.181	0.051	1
GALNS	0.00172817	0.0779787	0.164	0.04	1
MCM3	0.00172954	0.0834353	0.237	0.091	1
EHD3	0.00173471	-0.28945	0.046	0.111	1
BAZ1A	0.00174919	-0.0189158	0.42	0.202	1
TIMM50	0.00175157	-0.0144351	0.394	0.182	1
CMSS1	0.00175453	0.091854	0.19	0.061	1
PSME4	0.00176985	-0.0603201	0.262	0.101	1
AIFM2	0.00177338	0.047565	0.199	0.061	1
AC012368.1	0.00177582	-0.184481	0.058	0.131	1
NUP160	0.00177671	-0.0775943	0.147	0.03	1
PSMA3-AS1	0.00178417	-0.267954	0.046	0.111	1
ASPSCR1	0.00179355	0.0226869	0.292	0.121	1
IFNG-AS1	0.00180836	-0.343159	0.089	0.172	1
AHI1	0.00180858	0.0568213	0.194	0.061	1
TBC1D1	0.00181301	0.0169617	0.414	0.192	1
RHOH	0.00181318	-0.126252	0.592	0.313	1
KIF23	0.00183662	0.104315	0.108	0.01	1
AUP1	0.00183724	0.109545	0.913	0.657	1
DMAC2	0.00183875	0.086361	0.197	0.061	1
FCRL1	0.00185034	-0.144322	0.04	0.101	1
ATAD1	0.00186975	-0.0263264	0.353	0.162	1
HMGN3	0.00187417	-0.552549	0.708	0.646	1
IGHV4-4	0.00188033	1.20924	0.109	0.01	1
CEP295	0.00188463	0.0922785	0.144	0.03	1
EID1	0.00188984	-0.566779	0.658	0.626	1
FANCM	0.00189571	0.0926868	0.108	0.01	1
SLC10A7	0.00189916	0.105921	0.189	0.061	1
PSMB4	0.00189965	-0.52095	0.539	0.535	1
KIAA2013	0.00190984	0.0587025	0.226	0.081	1
ASNSD1	0.00191316	0.0573262	0.193	0.061	1
SLAIN2	0.00191753	0.0918676	0.195	0.061	1
SERBP1	0.001921	-0.605764	0.769	0.687	1
COL9A3	0.00194904	0.0359383	0.293	0.121	1
PTPRJ	0.00195273	0.102153	0.16	0.04	1
CENPF	0.00195318	0.246509	0.214	0.081	1
POM121C	0.00195919	-0.0180454	0.285	0.121	1
SUPT6H	0.00198338	-0.183158	0.394	0.192	1
HLA-DPA1	0.00200893	-0.804077	0.83	0.737	1
TAF2	0.00201326	0.0604206	0.195	0.061	1
MKL1	0.00201604	0.0853841	0.126	0.02	1
TRAPPC10	0.00201628	0.106574	0.191	0.061	1
UGP2	0.00201791	0.0570164	0.295	0.121	1
SLC43A3	0.0020208	0.0786873	0.192	0.061	1
BCL3	0.0020245	0.134098	0.224	0.081	1
RPS6KA3	0.00203273	0.119284	0.107	0.01	1
ATP13A3	0.00203965	0.0572626	0.211	0.071	1
CEBPZ	0.00205033	0.0236316	0.325	0.141	1
VPS28	0.00205173	-0.888631	0.656	0.586	1
PLXNC1	0.00206552	0.100198	0.141	0.03	1
C6orf203	0.00206644	0.0782766	0.107	0.01	1
POFUT1	0.00207719	0.0756134	0.144	0.03	1
ATP2C1	0.00208283	0.0802338	0.208	0.071	1
YIPF6	0.00208404	0.0394315	0.387	0.182	1
RBM39	0.00208485	-0.062394	0.911	0.636	1
KIAA1468	0.00209282	0.0976431	0.124	0.02	1
USP18	0.00210626	-0.0388466	0.108	0.01	1
ECT2	0.00211386	0.0136374	0.126	0.02	1
TBC1D20	0.00211638	0.00714703	0.257	0.101	1
EIF4G3	0.00212717	0.0719453	0.224	0.081	1
JADE1	0.00213859	0.104696	0.207	0.071	1
GTF3C3	0.00214539	0.0820728	0.144	0.03	1
TTC32	0.00214762	0.111621	0.157	0.04	1
HIVEP1	0.00216379	0.0877752	0.143	0.03	1
SMARCB1	0.00216558	-0.742343	0.628	0.576	1
NCBP1	0.00217246	-0.0450113	0.195	0.061	1
WASHC5	0.00217309	-0.0546431	0.222	0.081	1
TNFRSF1B	0.00217614	-0.0307878	0.251	0.101	1
RBM5	0.0021795	-0.126455	0.392	0.192	1
MSC	0.0021832	-0.182549	0.047	0.111	1
C2orf49	0.0021949	0.079648	0.159	0.04	1
UBE2E2	0.00220525	-0.082309	0.142	0.03	1
CUL5	0.00221042	-0.0744567	0.37	0.172	1
SP140L	0.0022115	0.0572775	0.285	0.121	1
NME1	0.00221256	-0.582123	0.506	0.525	1
SEC23A	0.00221259	0.0628871	0.244	0.091	1
HSH2D	0.00222024	-0.598968	0.745	0.636	1
CLUH	0.00225606	0.0366399	0.125	0.02	1
NUP98	0.00225626	0.0663272	0.276	0.111	1
KDM3B	0.00226422	0.0850932	0.141	0.03	1
PDCD7	0.00226884	-0.407631	0.155	0.242	1
SUPT3H	0.00227425	-0.0935211	0.125	0.02	1
HLA-A	0.00228104	-0.351172	0.998	1	1
C1GALT1	0.00228628	-0.019797	0.496	0.263	1
TAZ	0.00228696	-0.113018	0.307	0.131	1
ALG6	0.00229021	-0.0254014	0.222	0.081	1
MAP4K5	0.00229354	0.0211606	0.22	0.081	1
ABHD14A	0.00229942	-0.512222	0.219	0.303	1
METTL8	0.00230292	0.0184578	0.194	0.061	1
PAN2	0.00231748	0.0835722	0.124	0.02	1
TTC37	0.00232225	0.0313491	0.335	0.152	1
GZMM	0.00232878	-0.846198	0.104	0.192	1
MARK3	0.00234507	0.11316	0.408	0.202	1
TADA1	0.00234672	0.0687986	0.106	0.01	1
EIF2AK2	0.00236914	-0.231337	0.384	0.182	1
PDCL	0.00236964	0.068113	0.106	0.01	1
AKAP13	0.00238764	-0.207987	0.608	0.333	1
NDC80	0.00239775	0.107812	0.172	0.051	1
LIN54	0.00240655	0.0645511	0.158	0.04	1
PSMG1	0.00240763	0.0470616	0.237	0.091	1
HSPA14	0.0024166	0.0796425	0.123	0.02	1
COG4	0.00242418	0.0816769	0.256	0.101	1
TTTY15	0.00242517	0.0827434	0.105	0.01	1
AHCY	0.00243299	-0.783527	0.44	0.455	1
HIST1H2AM	0.00244501	0.243779	0.25	0.111	1
NAGLU	0.00245136	0.0500268	0.157	0.04	1
MELK	0.00245888	0.0635423	0.105	0.01	1
POLQ	0.00247218	0.102967	0.121	0.02	1
USF1	0.00249218	-0.0941431	0.306	0.131	1
CHCHD1	0.00249402	-0.056779	0.42	0.212	1
ACAP3	0.00249902	0.056845	0.141	0.03	1
ANKRD49	0.00249975	0.0597465	0.222	0.081	1
IGKV1-16	0.00250237	1.82735	0.105	0.01	1
TXNRD1	0.00250592	-0.0339648	0.258	0.101	1
NUSAP1	0.0025233	0.0481561	0.254	0.101	1
FGD2	0.00252819	-0.32371	0.18	0.263	1
LRMP	0.00254161	-0.0613382	0.501	0.253	1
MZT2B	0.00255187	-0.659563	0.698	0.646	1
RAD50	0.00255734	-0.361516	0.231	0.313	1
C4orf48	0.002577	-0.0247649	0.581	0.323	1
IFITM3	0.00257885	-1.24016	0.132	0.222	1
ATP2A3	0.00258007	-0.308387	0.634	0.333	1
CERS6	0.00258787	0.0931689	0.139	0.03	1
DHCR7	0.00259721	0.0483085	0.123	0.02	1
SCP2	0.00259883	-0.709661	0.455	0.475	1
CDADC1	0.00260671	0.0903285	0.172	0.051	1
USPL1	0.00261022	0.0113387	0.174	0.051	1
UBE2F	0.00261902	-0.53694	0.198	0.283	1
DDB2	0.0026248	0.114446	0.218	0.081	1
TIMELESS	0.00262504	0.0862424	0.14	0.03	1
RNH1	0.00262792	-0.62121	0.633	0.596	1
PHF20L1	0.00263425	-0.00221285	0.316	0.141	1
SLC39A3	0.00265903	-0.439458	0.181	0.263	1
REX1BD	0.00266488	-0.786738	0.571	0.545	1
C14orf37	0.0026669	0.0742934	0.152	0.04	1
WDR5	0.00268466	0.0362863	0.237	0.091	1
ZBP1	0.00268729	0.0874043	0.879	0.576	1
S100A9	0.00269442	-1.05776	0.17	0.263	1
IGKV3-15	0.00270165	-0.158533	0.171	0.051	1
METTL26	0.00270518	-0.519002	0.507	0.515	1
DCAF12	0.00272011	-0.390315	0.19	0.273	1
INTS1	0.00272247	-0.0279815	0.155	0.04	1
E2F2	0.00274411	0.08992	0.138	0.03	1
SLC25A13	0.00276244	0.0775849	0.103	0.01	1
IMMT	0.00276438	0.0914495	0.473	0.253	1
UPF3A	0.002773	-0.656817	0.458	0.475	1
HLA-DPB1	0.00278369	-0.88762	0.604	0.596	1
IGKV1-9	0.00280884	4.15175	0.12	0.02	1
SLAMF6	0.00283224	0.102623	0.236	0.091	1
METTL2A	0.00284324	-0.109263	0.222	0.081	1
ADAM10	0.00284556	-0.0367973	0.563	0.323	1
ALOX5AP	0.00286922	-0.604599	0.091	0.172	1
DBF4	0.00286967	0.0438031	0.351	0.162	1
IGLV1-47	0.00287868	0.201079	0.292	0.131	1
RPS6KC1	0.00288783	-0.0321452	0.103	0.01	1
THUMPD2	0.00290653	0.0674745	0.121	0.02	1
NSA2	0.00293022	-0.479721	0.542	0.535	1
BRCA2	0.00293174	0.11092	0.232	0.091	1
CLK3	0.00293318	-0.418335	0.199	0.283	1
TRABD	0.00293679	-0.48831	0.765	0.657	1
CIP2A	0.00294132	0.0824481	0.118	0.02	1
DNAJC21	0.0029518	0.0630335	0.201	0.071	1
GPR107	0.00295456	-0.0224136	0.191	0.061	1
HNRNPH1	0.00295508	-0.0240443	0.586	0.323	1
PSMD1	0.00295797	-0.152477	0.485	0.253	1
PSEN2	0.00297288	-0.0348634	0.189	0.061	1
HIST1H2AB	0.00297504	0.110531	0.101	0.01	1
APOPT1	0.00299054	0.0694793	0.102	0.01	1
SLC1A4	0.00299517	-0.0970513	0.533	0.273	1
DALRD3	0.00299718	-0.45333	0.159	0.242	1
SLC39A7	0.00300193	0.116213	0.731	0.444	1
AFF1	0.00301733	0.0796262	0.384	0.192	1
C10orf76	0.00303825	0.0667266	0.119	0.02	1
CENPU	0.00305438	0.119937	0.198	0.071	1
CKAP2	0.00306203	0.0151855	0.269	0.111	1
ATF6B	0.00307265	-0.0354084	0.546	0.283	1
ADM	0.00308002	0.1202	0.101	0.01	1
URI1	0.00308752	0.00075184	0.253	0.101	1
RASAL3	0.00309698	0.0189805	0.308	0.141	1
COA1	0.0031014	0.0239103	0.341	0.152	1
DTL	0.00310521	0.102706	0.118	0.02	1
SLF1	0.0031074	0.0848331	0.137	0.03	1
PDK1	0.00311302	-0.108689	0.53	0.293	1
OTULIN	0.00313163	0.0216286	0.218	0.081	1
LTN1	0.00313345	-0.0435002	0.293	0.131	1
TMEM45A	0.00313623	0.0647243	0.101	0.01	1
KLF3	0.00313801	-0.114181	0.442	0.232	1
ARL4C	0.00313976	-0.373426	0.307	0.394	1
SPC25	0.00315774	0.0937141	0.118	0.02	1
YIPF5	0.00315835	0.0202614	0.507	0.263	1
C16orf74	0.00316406	-0.509313	0.281	0.343	1
STAT2	0.00316812	-0.0334507	0.31	0.141	1
EFHC1	0.00316872	0.087787	0.185	0.061	1
SELENOS	0.00318501	0.213392	0.927	0.717	1
RHOT2	0.00318522	-0.131995	0.303	0.131	1
UXS1	0.00318683	-0.0639878	0.186	0.061	1
SBDS	0.00322673	-0.0852188	0.411	0.202	1
FYB1	0.00326217	-1.14795	0.162	0.253	1
CLMN	0.00327838	0.0766957	0.135	0.03	1
IGHJ6	0.00329389	0.364811	0.116	0.02	1
KLF13	0.00329491	-0.0266159	0.558	0.303	1
RNGTT	0.00330465	-0.00406906	0.314	0.141	1
CENPO	0.00332239	0.0849649	0.1	0.01	1
RHBDD3	0.00332557	-0.220342	0.236	0.091	1
NCF1	0.00332562	-0.481197	0.811	0.697	1
ORMDL3	0.00333968	-0.0436313	0.439	0.222	1
SMG6	0.00336147	0.0760844	0.169	0.051	1
PCMT1	0.00337371	-0.0313684	0.68	0.404	1
RAP1A	0.00338081	-0.468589	0.503	0.525	1
ITCH	0.00338489	0.0786235	0.476	0.242	1
DYNLRB1	0.00338545	-0.105986	0.596	0.343	1
SEC22A	0.00339428	0.0630489	0.135	0.03	1
WASHC4	0.0034077	-0.0703601	0.302	0.131	1
STMP1	0.00341993	-0.481095	0.409	0.444	1
MRPL34	0.00342308	-0.477343	0.486	0.495	1
TLE4	0.00343289	0.0866541	0.324	0.152	1
ZNF215	0.00343739	0.0802382	0.118	0.02	1
GDE1	0.00345926	0.141926	0.331	0.162	1
NCAPG	0.00347468	0.140028	0.162	0.051	1
EFL1	0.0034794	0.054458	0.1	0.01	1
MIER1	0.00348672	0.0357238	0.381	0.182	1
FNBP4	0.00348878	0.0215304	0.479	0.253	1
NPEPPS	0.00349856	-0.0655332	0.387	0.182	1
EDC3	0.00350291	0.0670105	0.118	0.02	1
ALG2	0.003505	0.0230182	0.501	0.263	1
BRD7	0.00351875	-0.20699	0.297	0.131	1
HVCN1	0.0035244	-0.283759	0.042	0.101	1
TDG	0.00355901	0.0372818	0.358	0.172	1
SYTL3	0.00358127	-0.0871232	0.151	0.04	1
ZNF100	0.00358304	0.0596056	0.135	0.03	1
DNAJB4	0.00359066	0.0514024	0.117	0.02	1
SDF2	0.00359694	-0.0130802	0.445	0.222	1
TBCEL	0.00359779	0.0770333	0.117	0.02	1
PPTC7	0.00361253	0.0788867	0.196	0.071	1
SPAG9	0.00361695	-0.0119407	0.235	0.091	1
GIGYF2	0.0036345	0.083104	0.357	0.172	1
TNFRSF10A	0.00364792	0.0723019	0.134	0.03	1
TUFM	0.00365426	-0.47307	0.895	0.727	1
ATP2A2	0.00365958	0.0559398	0.416	0.212	1
DNAJC19	0.0036872	-0.42807	0.343	0.394	1
ACTN4	0.00369978	-0.217049	0.512	0.263	1
TUBGCP3	0.00370076	0.00361885	0.197	0.071	1
ABHD11	0.0037062	0.0618609	0.117	0.02	1
SNRPC	0.00371757	-0.572782	0.656	0.606	1
ABCC4	0.00372409	0.0607676	0.2	0.071	1
BIRC2	0.00373079	0.0926288	0.275	0.121	1
SGCB	0.00373176	0.0581269	0.168	0.051	1
MTFR1	0.00374654	0.0703142	0.116	0.02	1
ADAM19	0.003752	0.0305544	0.572	0.313	1
SLC35E3	0.00375277	0.0526059	0.277	0.121	1
CD164	0.00375433	0.0558021	0.836	0.525	1
ELP2	0.00375967	-0.0766421	0.215	0.081	1
TMEM259	0.00376168	-0.00470731	0.458	0.232	1
CLCC1	0.00377566	-0.0609205	0.35	0.162	1
CD58	0.00377571	-0.0589609	0.263	0.111	1
N4BP2	0.00377649	-0.169875	0.249	0.101	1
ELP6	0.0037984	-0.0601899	0.305	0.141	1
TIMM23B	0.00381684	-0.0282437	0.147	0.04	1
HAT1	0.0038287	0.0583077	0.309	0.141	1
HNRNPLL	0.00384759	0.0731602	0.15	0.04	1
HTT	0.0038615	-0.0230749	0.181	0.061	1
AKAP8L	0.0038731	-0.0456183	0.324	0.152	1
ANKRD36	0.00388712	0.117149	0.286	0.131	1
CLTA	0.00389699	-0.714551	0.571	0.545	1
KNL1	0.0039098	0.141485	0.221	0.091	1
ACAA2	0.0039156	0.0373221	0.393	0.202	1
ZNF22	0.00393058	-0.819344	0.281	0.343	1
RRP36	0.00393468	0.0223247	0.199	0.071	1
ASH1L	0.00394349	0.0660621	0.412	0.212	1
GCC2	0.00394393	0.0254468	0.485	0.263	1
NBPF14	0.00395304	-0.0196468	0.202	0.071	1
RLF	0.00396095	0.00393013	0.248	0.101	1
RING1	0.00396671	-0.0274667	0.28	0.121	1
RNF115	0.00396822	-0.0935957	0.417	0.212	1
SLC16A14	0.00399601	0.0889601	0.148	0.04	1
POMT1	0.00399913	0.0239572	0.165	0.051	1
DYNC1LI2	0.00401093	0.0851794	0.261	0.111	1
PSMB5	0.00401361	-0.447384	0.409	0.434	1
RGS19	0.00403565	-0.533294	0.315	0.374	1
CD151	0.00404696	-0.164876	0.327	0.152	1
CHD8	0.00405847	0.0844152	0.274	0.121	1
TRPV2	0.00406489	0.0861099	0.419	0.222	1
MLXIP	0.00406783	0.0633751	0.261	0.111	1
UBE2Q1	0.00408882	-0.0807783	0.254	0.101	1
CLASP2	0.0040904	0.0977534	0.228	0.091	1
PNOC	0.00410456	-0.485423	0.36	0.404	1
TMEM222	0.00411093	-0.121913	0.293	0.131	1
FAM214A	0.00411612	-0.076002	0.371	0.182	1
RALGAPB	0.00416309	-0.0894435	0.166	0.051	1
USP1	0.00416367	0.0368159	0.302	0.141	1
ITGB7	0.00416924	0.152096	0.895	0.596	1
WDFY1	0.00418865	0.0607297	0.291	0.131	1
FASTKD2	0.00419009	-0.0641346	0.21	0.081	1
BTBD7	0.0042168	0.0299401	0.15	0.04	1
SETD2	0.00422304	0.0797899	0.209	0.081	1
FAM160B1	0.00423025	-0.0967143	0.267	0.121	1
TMED1	0.00423378	-0.141812	0.323	0.152	1
HIST1H2BN	0.00423473	0.0552907	0.114	0.02	1
KDM6A	0.00423622	0.0137322	0.262	0.111	1
SUPT16H	0.00423794	-0.083494	0.36	0.182	1
UHRF1BP1L	0.00425395	-0.105055	0.15	0.04	1
SLC38A1	0.00426986	-0.217247	0.65	0.374	1
SLC35A2	0.00427149	0.0390906	0.276	0.121	1
ATAD3B	0.00428087	0.0469965	0.148	0.04	1
HIST1H3G	0.00429206	0.0991266	0.131	0.03	1
TM7SF3	0.00430021	-0.223482	0.373	0.182	1
SOAT1	0.00431114	-0.0925274	0.231	0.091	1
TAX1BP1	0.00431367	-0.171867	0.684	0.394	1
B4GALT7	0.00433055	-0.122338	0.247	0.101	1
MED9	0.00435229	0.0830329	0.131	0.03	1
PFKL	0.00435648	-0.112624	0.451	0.232	1
YIF1B	0.00436621	-0.0815515	0.771	0.495	1
ANKRD13C	0.00438251	-0.00430469	0.15	0.04	1
NHP2	0.0043832	-0.689065	0.52	0.515	1
ARRDC3	0.00439392	0.0519268	0.213	0.081	1
DDOST	0.00439739	0.225101	0.953	0.778	1
KNTC1	0.00440549	0.0665408	0.198	0.071	1
TNPO1	0.00442304	-0.0306974	0.303	0.141	1
FERMT3	0.00443001	-0.0254245	0.533	0.293	1
PAPOLA	0.00444337	-0.55659	0.681	0.586	1
SERINC1	0.00445179	-0.253889	0.462	0.232	1
DEGS1	0.00445613	-0.242605	0.402	0.202	1
CLK4	0.00446689	-0.0816957	0.194	0.071	1
USP15	0.00447747	-0.265887	0.621	0.333	1
AGPAT3	0.00449298	0.0724911	0.146	0.04	1
MEF2A	0.00450161	-0.0106486	0.348	0.172	1
UBE2O	0.00450241	0.0397338	0.132	0.03	1
PRADC1	0.00450405	-0.0240378	0.277	0.121	1
TMEM219	0.00450786	-0.529418	0.538	0.515	1
TAF3	0.00451152	0.0779762	0.272	0.121	1
POU2AF1	0.00451535	-0.555559	0.847	0.758	1
RAB3GAP2	0.00452976	-0.0836018	0.216	0.081	1
SLC27A3	0.00454017	0.0604737	0.148	0.04	1
NRM	0.00454183	0.0557485	0.114	0.02	1
GBP1	0.00454812	-0.245412	0.148	0.04	1
CCDC58	0.00458046	0.0249849	0.164	0.051	1
LEPROTL1	0.00458492	-0.0612703	0.552	0.303	1
MRPL37	0.00458612	-0.654134	0.469	0.465	1
IGHV3-53	0.00459558	1.18025	0.113	0.02	1
SLC35B4	0.00459753	-0.0677356	0.165	0.051	1
AC012146.1	0.00460275	-0.183648	0.057	0.121	1
HS2ST1	0.00460646	0.0220137	0.32	0.152	1
PTBP3	0.0046099	-0.0063339	0.33	0.162	1
PIAS2	0.00461213	-0.121512	0.165	0.051	1
SEC24C	0.0046208	-0.119249	0.358	0.172	1
TTC17	0.00462865	-0.0246232	0.491	0.263	1
ASPH	0.00463668	-0.0800301	0.166	0.051	1
ANP32B	0.00464757	-0.786503	0.658	0.616	1
SLC26A6	0.00465313	0.0790978	0.111	0.02	1
CD63	0.00468389	-0.19386	0.768	0.475	1
PHF1	0.00473166	-0.269329	0.31	0.141	1
ACO2	0.00474043	0.0426989	0.685	0.414	1
CNOT1	0.00475315	-0.002101	0.454	0.242	1
TUBG2	0.00475727	0.0672037	0.13	0.03	1
NAMPT	0.0047693	-0.0426445	0.26	0.111	1
SETBP1	0.00478465	-0.00956553	0.353	0.172	1
HGS	0.00481157	-0.0251061	0.228	0.091	1
RNF13	0.0048125	-0.0714507	0.416	0.212	1
VARS2	0.00483458	-0.00458578	0.214	0.081	1
OGFOD3	0.00484857	-0.0547619	0.499	0.253	1
CPD	0.00484977	0.0921945	0.145	0.04	1
PPM1D	0.00485401	0.0541148	0.181	0.061	1
PSMG2	0.00485663	-0.701979	0.486	0.475	1
DGUOK	0.00486227	-0.649771	0.496	0.485	1
IGHA1	0.0048653	0.888716	0.758	0.525	1
MCL1	0.00486804	-0.615702	0.786	0.667	1
TAF4B	0.00487912	0.0816196	0.271	0.121	1
COIL	0.00488722	0.0425815	0.244	0.101	1
ARHGDIA	0.00490904	-0.591509	0.753	0.667	1
FANCI	0.00491393	0.0657963	0.146	0.04	1
DNTTIP2	0.00492238	0.0247984	0.423	0.222	1
SSFA2	0.00492619	0.0771172	0.127	0.03	1
HAUS3	0.00492975	0.0540619	0.192	0.071	1
CGGBP1	0.00494564	-0.118791	0.354	0.172	1
MRPL41	0.00495518	-0.602982	0.619	0.596	1
TRA2A	0.00495914	-0.0297146	0.494	0.253	1
TULP4	0.00497905	-0.0737113	0.145	0.04	1
SEMA4A	0.00498114	0.0502463	0.728	0.465	1
TUBA4A	0.0049896	-0.181267	0.555	0.303	1
VAMP8	0.00500895	-0.823778	0.602	0.566	1
KLF6	0.00501038	0.0320154	0.489	0.283	1
NIN	0.00501909	-0.0629894	0.357	0.172	1
ECD	0.005034	0.0665629	0.208	0.081	1
MRPS12	0.00504177	-0.533293	0.459	0.455	1
CARD11	0.00504566	0.0797781	0.175	0.061	1
ASMTL	0.00506423	-0.0650836	0.195	0.071	1
R3HDM1	0.00508083	0.0196939	0.32	0.152	1
BTBD1	0.00508609	0.0876021	0.271	0.121	1
LRRC58	0.00508741	-0.0413987	0.24	0.101	1
MINPP1	0.00509175	0.0582511	0.209	0.081	1
WASHC2A	0.00510117	-0.0703079	0.193	0.071	1
PPP1CC	0.00510391	-0.65442	0.682	0.606	1
P4HA1	0.00512321	-0.0584036	0.227	0.091	1
KCNK6	0.00514962	0.0405592	0.456	0.253	1
ST8SIA4	0.00515722	-0.0970202	0.532	0.283	1
HERC1	0.0051619	-0.0631848	0.295	0.131	1
ZFP36L2	0.00516754	-0.765275	0.582	0.586	1
GABARAPL2	0.00516771	-0.721689	0.537	0.525	1
SLC38A10	0.00518167	-0.0349447	0.788	0.475	1
SAFB	0.00518276	-0.0521214	0.402	0.202	1
MCM5	0.00519399	0.129362	0.357	0.192	1
MYO1G	0.00519599	-0.598923	0.439	0.485	1
TYMS	0.00520401	0.115751	0.278	0.131	1
[truncated: 5,344 more rows]
