# Supplementary material for: Glycosylated IgG antibodies contribute to the recovery of haemorrhagic fever with renal syndrome patients
Source: bioRxiv preprint, doi:10.1101/2025.04.11.648365, version 6 (2025-12-04)
Supplement: Supplementary file 11 [file 648365_file19.xlsx]

## Sheet: sheet 1
Supplementary file 11. Differential expression genes in the DN, IM and naive B cell subpopulations
gene_name	p_val	avg_log2FC	pct.1	pct.2	p_val_adj
TSC22D3	3.32884e-235	1.57667	0.988	0.783	7.10741e-231
TMSB4X	2.04229e-183	-0.912014	0.993	0.999	4.3605e-179
TPT1	5.30502e-147	-0.790329	0.995	0.999	1.13268e-142
LTB	3.98049e-146	-1.14816	0.833	0.948	8.49874e-142
TXNIP	1.08967e-145	1.02091	0.989	0.959	2.32655e-141
ACTB	1.08772e-140	-0.866589	0.987	0.998	2.32239e-136
DUSP1	3.33737e-140	1.45045	0.814	0.412	7.12562e-136
CD69	6.4872e-134	1.71194	0.667	0.238	1.38508e-129
HLA-DPB1	5.27761e-132	-0.825215	0.965	0.986	1.12682e-127
KLF6	3.94231e-128	1.52901	0.779	0.408	8.41723e-124
PPP1R15A	1.99222e-108	1.52659	0.549	0.185	4.25359e-104
CD74	9.16963e-106	-0.549063	1	1	1.95781e-101
ACTG1	2.42583e-105	-1.13941	0.707	0.856	5.17939e-101
FOS	7.85311e-104	1.71812	0.393	0.072	1.67672e-99
HLA-DRB5	5.92427e-101	-1.09885	0.735	0.918	1.26489e-96
CD83	8.26456e-96	1.42527	0.473	0.134	1.76457e-91
RPLP0	6.81864e-92	1.2743	0.627	0.312	1.45585e-87
RPS3	1.43873e-85	1.16646	0.632	0.313	3.07183e-81
JUN	1.02531e-84	1.35599	0.676	0.342	2.18914e-80
RPS19	1.89726e-84	1.21157	0.63	0.313	4.05084e-80
RPL36	1.31238e-80	1.13768	0.628	0.312	2.80206e-76
STAG3	1.58404e-79	1.19564	0.414	0.113	3.38209e-75
RPL14	2.6005e-79	1.10508	0.63	0.312	5.55232e-75
RPL28	5.86149e-79	1.09648	0.632	0.313	1.25149e-74
RPS25	3.94998e-76	1.07142	0.629	0.313	8.43359e-72
RPL7A	4.32789e-76	1.0712	0.63	0.313	9.24047e-72
RPL13A	7.07473e-73	1.06048	0.622	0.31	1.51053e-68
RPSA	1.06758e-71	1.06151	0.621	0.311	2.27938e-67
RPS15	1.51171e-71	1.03181	0.63	0.313	3.22766e-67
RPS16	2.12427e-71	1.02918	0.627	0.311	4.53552e-67
RPS11	1.13382e-70	1.01773	0.612	0.31	2.42082e-66
RPL7	4.08191e-70	1.0059	0.596	0.301	8.71528e-66
RPL10	4.14932e-70	1.04682	0.631	0.313	8.85921e-66
RPL11	5.068e-70	1.02479	0.628	0.313	1.08207e-65
RPL18	1.58825e-69	1.00681	0.63	0.313	3.39108e-65
RPL29	2.95687e-69	1.00931	0.63	0.313	6.31321e-65
RPLP1	1.3517e-68	1.02264	0.632	0.313	2.88601e-64
RPL30	1.93336e-67	1.00683	0.63	0.313	4.12791e-63
RPS13	2.69127e-67	1.00626	0.63	0.313	5.74613e-63
PELI1	2.70345e-67	0.916639	0.406	0.128	5.77213e-63
LIMD2	1.20601e-66	-0.686148	0.853	0.894	2.57495e-62
HLA-DRA	1.6552e-66	-0.496387	0.994	0.998	3.53402e-62
RPL5	1.01014e-65	0.965971	0.624	0.313	2.15675e-61
RPS7	1.92984e-65	0.95798	0.629	0.313	4.1204e-61
RPL23A	8.16106e-65	0.970929	0.625	0.312	1.74247e-60
RPS15A	1.29044e-64	0.981181	0.631	0.313	2.75521e-60
RPS14	2.183e-64	0.9661	0.63	0.312	4.66092e-60
RPL31	3.02696e-64	0.967343	0.589	0.298	6.46287e-60
RPS5	4.94605e-64	0.963434	0.628	0.313	1.05603e-59
RPL19	5.65275e-64	0.964862	0.632	0.313	1.20692e-59
RPL13	9.02869e-63	0.969019	0.632	0.313	1.92771e-58
NEAT1	4.03415e-62	0.854889	0.525	0.229	8.61331e-58
RPS18	5.07518e-62	0.945991	0.63	0.313	1.0836e-57
RPL24	7.70855e-62	0.927281	0.616	0.313	1.64585e-57
RPS2	1.20769e-61	0.937981	0.629	0.313	2.57855e-57
PPIA	1.53109e-61	-0.640074	0.944	0.963	3.26902e-57
RPS24	2.64348e-61	0.928879	0.628	0.313	5.64409e-57
RPL18A	3.11735e-61	0.951929	0.631	0.313	6.65586e-57
RPS27A	6.73335e-61	0.953093	0.632	0.313	1.43764e-56
RPS4Y1	1.01018e-59	0.817254	0.557	0.253	2.15684e-55
PFN1	1.28131e-59	-0.614034	0.925	0.955	2.73573e-55
RPS23	2.63475e-59	0.94016	0.63	0.313	5.62545e-55
RPL3	2.7036e-59	0.908276	0.63	0.312	5.77247e-55
RPS12	4.01963e-59	0.919194	0.632	0.313	8.58231e-55
RPS17	7.2222e-59	0.876648	0.508	0.245	1.54201e-54
RPS28	9.99724e-59	0.928656	0.63	0.313	2.13451e-54
RPL17	1.70162e-58	0.88336	0.622	0.311	3.63314e-54
CXCR4	2.66152e-58	0.59862	0.911	0.679	5.68262e-54
RPL27A	5.32147e-58	0.952751	0.562	0.29	1.13619e-53
RPS9	5.00303e-57	0.87524	0.623	0.312	1.0682e-52
RPL26	1.15713e-56	0.887296	0.63	0.313	2.47059e-52
RPL15	2.07154e-56	0.85701	0.625	0.313	4.42294e-52
RPL35	2.27638e-56	0.858959	0.619	0.311	4.86029e-52
MT-CO2	3.32757e-56	0.975745	0.632	0.313	7.1047e-52
IGLV1-40	5.79402e-56	0.131203	0.244	0.041	1.23708e-51
RPS4X	1.86906e-55	0.840463	0.629	0.313	3.99063e-51
RPL35A	3.37578e-55	0.867952	0.628	0.313	7.20762e-51
CORO1A	1.86389e-54	-0.674942	0.803	0.864	3.97959e-50
RPS6	4.13274e-54	0.856389	0.628	0.312	8.82382e-50
PMAIP1	1.55993e-53	0.753421	0.32	0.096	3.33061e-49
RPL37A	9.9146e-53	0.831598	0.624	0.309	2.11687e-48
UBC	1.86305e-52	0.77009	0.939	0.813	3.9778e-48
RPL36AL	2.00041e-52	0.869644	0.5	0.255	4.27107e-48
RPL27	2.58572e-52	0.790382	0.606	0.306	5.52078e-48
YBX3	2.68438e-52	0.802706	0.505	0.239	5.73143e-48
SNHG7	9.10767e-52	-1.44076	0.083	0.274	1.94458e-47
RPS27	5.89717e-51	0.855426	0.631	0.313	1.25911e-46
RPS3A	7.7538e-51	0.817649	0.63	0.313	1.65551e-46
RPL10A	1.17536e-50	0.793504	0.616	0.311	2.50952e-46
RPL32	1.33474e-50	0.862086	0.629	0.313	2.84981e-46
RPL39	1.36393e-50	0.843777	0.632	0.313	2.91213e-46
RPS8	1.38126e-50	0.831154	0.632	0.313	2.94913e-46
RPLP2	1.9017e-50	0.818695	0.632	0.313	4.06031e-46
H3F3A	8.55806e-50	-0.561613	0.91	0.933	1.82723e-45
EEF1A1	1.76697e-49	-0.364131	0.999	1	3.77267e-45
RPL8	5.25476e-49	0.792464	0.63	0.312	1.12194e-44
FKBP5	9.06675e-49	0.72388	0.256	0.065	1.93584e-44
RPL38	1.01413e-48	0.733861	0.6	0.306	2.16528e-44
MT-ND4L	5.40312e-48	0.823284	0.63	0.313	1.15362e-43
RPL9	5.47246e-48	0.760968	0.623	0.311	1.16842e-43
ATP5G2	1.31265e-47	0.75603	0.523	0.275	2.80264e-43
RPS21	7.8721e-47	0.782818	0.63	0.313	1.68077e-42
RPL34	9.78125e-47	0.804402	0.631	0.313	2.08839e-42
RPL4	1.21161e-46	0.71542	0.595	0.307	2.5869e-42
JUND	3.00479e-46	0.681062	0.326	0.115	6.41553e-42
OAZ1	5.61935e-46	-0.551108	0.907	0.93	1.19979e-41
SBDS	3.17544e-45	0.565361	0.36	0.134	6.77988e-41
SH3BGRL3	3.33686e-45	-0.655958	0.86	0.894	7.12452e-41
RPL22	3.53481e-45	0.70069	0.626	0.313	7.54716e-41
PTPRCAP	9.93178e-45	0.469363	0.929	0.709	2.12053e-40
HSPA8	1.31722e-44	-0.876145	0.605	0.71	2.8124e-40
ATP5L	3.33902e-44	0.718645	0.493	0.256	7.12915e-40
RPL37	3.54871e-44	0.76545	0.629	0.313	7.57686e-40
RPL12	1.07766e-43	0.722851	0.627	0.313	2.30092e-39
SRSF10	1.71739e-43	0.49737	0.615	0.347	3.66681e-39
IGLV2-14	3.93363e-43	-0.45538	0.272	0.072	8.3987e-39
RPL6	6.11512e-43	0.688629	0.625	0.313	1.30564e-38
TRA2B	8.69107e-43	0.58347	0.565	0.306	1.85563e-38
IGKV3-20	9.57334e-43	-0.326132	0.329	0.103	2.044e-38
ATP5E	1.86013e-42	0.720078	0.559	0.306	3.97156e-38
IGLV5-37	5.06482e-42	0.522406	0.113	0.001	1.08139e-37
RPS20	4.23921e-41	0.667213	0.523	0.28	9.05113e-37
MT-CYB	6.12353e-41	0.676817	0.63	0.313	1.30743e-36
MT-ND2	1.19979e-40	0.522403	0.604	0.308	2.56167e-36
MT-ATP6	3.44101e-40	0.578664	0.615	0.312	7.34691e-36
EEF1B2	9.08761e-40	-0.484988	0.98	0.99	1.9403e-35
CFLAR	9.86646e-40	0.613609	0.383	0.169	2.10659e-35
ARHGDIB	1.65533e-39	-0.496849	0.903	0.911	3.5343e-35
HVCN1	2.16147e-39	-0.923452	0.533	0.633	4.61496e-35
MS4A1	3.12763e-39	-0.501158	0.924	0.912	6.67781e-35
EIF1B	8.47562e-39	0.519328	0.606	0.339	1.80963e-34
GABPB1	1.26488e-38	0.622979	0.336	0.14	2.70065e-34
PIK3IP1	2.19196e-38	0.552249	0.432	0.203	4.68006e-34
RPL21	1.89294e-37	0.613773	0.619	0.313	4.04163e-33
MT-ND4	2.49191e-37	0.493294	0.6	0.309	5.32048e-33
NFKBIA	4.31926e-37	0.968267	0.735	0.517	9.22205e-33
RPL23	1.21505e-36	0.643809	0.485	0.269	2.59424e-32
CYBA	2.58999e-36	-0.541412	0.85	0.869	5.5299e-32
RBM38	2.80077e-36	0.508512	0.229	0.07	5.97992e-32
SLC2A3	5.57416e-36	0.63054	0.294	0.113	1.19014e-31
SNHG29	8.40884e-36	-0.816576	0.337	0.543	1.79537e-31
RNF19A	2.549e-35	0.560123	0.267	0.096	5.44236e-31
HLA-B	2.95364e-35	0.313222	0.998	0.987	6.30631e-31
RCSD1	1.1327e-34	0.513445	0.82	0.582	2.41842e-30
IGKV1-5	1.27883e-34	0.0400341	0.203	0.051	2.73042e-30
MT-CO3	1.53412e-34	0.593654	0.632	0.313	3.2755e-30
GAS5	2.11991e-34	-0.857973	0.299	0.489	4.52623e-30
IGLV2-8	2.94152e-34	0.37485	0.132	0.017	6.28044e-30
UCP2	3.03861e-34	-0.635734	0.712	0.784	6.48773e-30
GLO1	3.35269e-34	0.440829	0.446	0.222	7.15832e-30
TP53INP1	5.81121e-34	0.526424	0.319	0.13	1.24075e-29
2025-09-07	5.93844e-34	0.598427	0.404	0.207	1.26792e-29
ATP5D	6.64355e-34	0.594919	0.361	0.177	1.41846e-29
IFITM1	7.67236e-34	0.266876	0.651	0.372	1.63812e-29
IGLV1-51	9.90545e-34	0.0281227	0.196	0.048	2.11491e-29
AC004687.1	1.25851e-33	-0.927564	0.055	0.19	2.68705e-29
GADD45B	1.27019e-33	0.798154	0.364	0.177	2.71199e-29
TUBA1A	1.7381e-33	0.541445	0.541	0.313	3.71101e-29
CSRNP1	2.64244e-33	0.544966	0.19	0.05	5.64188e-29
LAPTM5	3.14778e-33	0.351921	0.982	0.936	6.72083e-29
NACA	3.41727e-33	-0.323114	0.99	0.992	7.29621e-29
JUNB	6.22745e-33	0.735631	0.746	0.547	1.32962e-28
MT-ATP8	1.31431e-32	0.436849	0.628	0.313	2.80619e-28
ATP5PO	1.95541e-32	-0.895314	0.253	0.414	4.175e-28
TMEM2	3.55317e-32	0.624326	0.199	0.061	7.58637e-28
CCDC6	1.49329e-31	0.455129	0.224	0.074	3.18832e-27
HIST1H4C	1.53546e-31	0.532906	0.519	0.296	3.27837e-27
TLE5	1.69559e-31	-1.12901	0.204	0.355	3.62026e-27
SAT1	1.95956e-31	0.586494	0.63	0.401	4.18385e-27
RPS29	2.20531e-31	0.457671	0.622	0.312	4.70855e-27
MT-ND5	3.12851e-31	0.38966	0.617	0.311	6.67968e-27
SON	2.56973e-30	0.45773	0.735	0.504	5.48663e-26
CALM2	4.56509e-30	-0.74465	0.562	0.646	9.74693e-26
PTPN1	7.60625e-30	0.464963	0.419	0.224	1.62401e-25
FAM46C	8.49955e-30	0.510949	0.158	0.04	1.81474e-25
LY6E	1.65845e-29	0.382486	0.725	0.499	3.54095e-25
MT-ND3	1.66745e-29	0.473058	0.631	0.313	3.56018e-25
HLA-DQA2	2.89185e-29	-1.19523	0.225	0.366	6.17438e-25
ZBTB16	2.98111e-29	0.500908	0.178	0.051	6.36496e-25
YPEL5	4.50158e-29	0.476622	0.395	0.204	9.61132e-25
COX4I1	7.00946e-29	-0.399076	0.929	0.945	1.49659e-24
DDIT3	1.02036e-28	0.410057	0.205	0.065	2.17856e-24
ATP5MC2	2.67115e-28	-0.556771	0.348	0.565	5.70318e-24
EEF1G	4.07608e-28	-0.391825	0.963	0.962	8.70284e-24
PFDN5	4.70607e-28	-0.388686	0.961	0.954	1.00479e-23
IGLV1-44	4.8188e-28	0.0403071	0.196	0.059	1.02886e-23
MZB1	7.47474e-28	0.454686	0.326	0.153	1.59593e-23
MAP3K8	1.04243e-27	0.518341	0.387	0.197	2.22569e-23
CCND3	1.24481e-27	0.37191	0.689	0.454	2.65779e-23
MT-ND1	1.30515e-27	0.311376	0.627	0.311	2.78663e-23
RCC1	2.33527e-27	0.492713	0.234	0.094	4.98604e-23
FAM129C	2.90538e-27	0.637656	0.397	0.221	6.20329e-23
UBA52	3.6291e-27	-0.335709	0.972	0.981	7.74849e-23
HIF1A	3.96253e-27	0.368942	0.382	0.193	8.46039e-23
RPL22L1	5.04599e-27	0.548829	0.336	0.174	1.07737e-22
HLA-DPA1	1.09187e-26	-0.338566	0.982	0.98	2.33126e-22
IGLV3-25	1.27041e-26	-0.0922241	0.131	0.026	2.71245e-22
BTG1	1.49636e-26	0.274021	0.985	0.94	3.19487e-22
STK17B	1.55538e-26	0.334937	0.578	0.356	3.32089e-22
FXYD5	1.74163e-26	-0.452156	0.855	0.849	3.71854e-22
SNHG9	3.81349e-26	0.478019	0.224	0.09	8.14217e-22
NDUFA3	4.22317e-26	0.420344	0.43	0.245	9.0169e-22
RHOH	4.64395e-26	0.392472	0.551	0.338	9.9153e-22
SNX9	4.90689e-26	0.388999	0.268	0.115	1.04767e-21
ATP5G3	6.51368e-26	0.522827	0.29	0.143	1.39074e-21
NR4A2	7.68144e-26	0.578154	0.111	0.019	1.64006e-21
CD52	1.06304e-25	-0.337883	0.984	0.987	2.2697e-21
G3BP2	1.33884e-25	0.362874	0.362	0.184	2.85857e-21
DDX21	1.45703e-25	0.474982	0.342	0.175	3.11091e-21
RNMT	1.49008e-25	0.418851	0.286	0.131	3.18147e-21
IGLV3-19	1.71224e-25	-0.0808055	0.128	0.026	3.65579e-21
ROMO1	1.78545e-25	0.347502	0.377	0.197	3.81212e-21
NFKBID	1.8564e-25	0.690809	0.225	0.09	3.96361e-21
EEF2	2.49819e-25	-0.34418	0.963	0.966	5.33389e-21
MT-CO1	2.5619e-25	0.383577	0.63	0.313	5.4699e-21
ILF2	3.24428e-25	0.311048	0.407	0.216	6.92686e-21
LY9	5.04005e-25	0.452872	0.26	0.113	1.0761e-20
RHOB	5.34266e-25	0.629681	0.261	0.118	1.14071e-20
2025-09-06	6.94509e-25	0.534824	0.324	0.17	1.48285e-20
PPDPF	7.95289e-25	-0.554857	0.738	0.781	1.69802e-20
PDE4B	1.06912e-24	0.423917	0.398	0.222	2.28269e-20
IGLV2-11	1.41839e-24	0.0569988	0.105	0.017	3.02841e-20
TNRC6B	1.89164e-24	0.329707	0.403	0.218	4.03885e-20
MALAT1	2.93793e-24	0.293196	0.998	0.999	6.27278e-20
MYADM	2.99576e-24	0.70745	0.223	0.092	6.39625e-20
IGKV1-12	3.12972e-24	0.554165	0.107	0.018	6.68227e-20
ATP5J	3.50883e-24	0.469493	0.262	0.126	7.4917e-20
IQGAP1	4.14286e-24	0.332023	0.467	0.272	8.84542e-20
EPC1	5.45676e-24	0.308953	0.613	0.386	1.16507e-19
TRIR	6.03468e-24	-0.691703	0.535	0.604	1.28847e-19
ZFP36	6.18003e-24	0.522488	0.718	0.53	1.3195e-19
CFL1	6.92556e-24	-0.436849	0.89	0.894	1.47868e-19
ATPIF1	7.38856e-24	0.487385	0.307	0.159	1.57753e-19
HERPUD1	7.42567e-24	0.654848	0.568	0.38	1.58545e-19
TRA2A	7.46072e-24	0.302495	0.365	0.194	1.59294e-19
CREBRF	7.98673e-24	0.314678	0.279	0.128	1.70525e-19
CD55	9.25964e-24	0.326306	0.541	0.333	1.97703e-19
C6orf48	1.29001e-23	0.445532	0.191	0.074	2.75429e-19
SERTAD1	1.63027e-23	0.569827	0.141	0.041	3.48078e-19
TAF1D	3.0667e-23	0.319568	0.509	0.309	6.54771e-19
REL	3.43404e-23	0.281148	0.564	0.349	7.33202e-19
IRF1	3.68391e-23	0.585948	0.495	0.309	7.86553e-19
RPS26	3.74033e-23	0.0503346	0.597	0.301	7.98598e-19
2025-09-02	3.7991e-23	0.519965	0.223	0.099	8.11145e-19
PET100	4.13938e-23	0.387788	0.433	0.257	8.83799e-19
RGS2	4.29552e-23	0.465385	0.118	0.027	9.17136e-19
LCN8	5.6008e-23	0.458778	0.107	0.021	1.19583e-18
HLA-C	6.45158e-23	0.226413	0.993	0.936	1.37748e-18
YBX1	6.54186e-23	-0.554098	0.78	0.782	1.39675e-18
2025-09-09	1.81086e-22	0.488925	0.294	0.153	3.86637e-18
ZFP36L2	1.91485e-22	0.365345	0.883	0.734	4.08841e-18
NDUFA1	2.02114e-22	0.347169	0.56	0.369	4.31534e-18
RBM39	2.57618e-22	0.346295	0.682	0.478	5.50041e-18
ATP5J2	3.80108e-22	0.455125	0.282	0.145	8.11569e-18
IGLV3-1	4.42254e-22	-0.404088	0.134	0.035	9.44256e-18
PTPN6	5.67994e-22	-0.608246	0.586	0.651	1.21272e-17
AREG	8.51753e-22	0.496557	0.103	0.021	1.81858e-17
SEC62	8.84543e-22	0.327345	0.698	0.482	1.88859e-17
CD37	9.36475e-22	-0.273959	0.994	0.996	1.99947e-17
RPS10	9.76616e-22	0.318719	0.441	0.254	2.08517e-17
FTL	1.24975e-21	-0.275416	0.986	0.993	2.66834e-17
DYNLRB1	1.36576e-21	0.363949	0.291	0.15	2.91603e-17
SESN1	1.53084e-21	0.500566	0.301	0.155	3.2685e-17
SSH2	1.62535e-21	0.337483	0.423	0.248	3.47027e-17
NUCKS1	3.20115e-21	0.346054	0.43	0.257	6.83477e-17
COX7C	5.11458e-21	0.349394	0.894	0.759	1.09201e-16
ATP5F1B	5.22484e-21	-0.766934	0.194	0.316	1.11556e-16
MAPK1IP1L	5.75302e-21	0.329465	0.375	0.209	1.22833e-16
ZFAS1	8.37722e-21	-0.749883	0.275	0.403	1.78862e-16
NAA10	1.31817e-20	0.360854	0.237	0.111	2.81442e-16
KIAA1551	1.38629e-20	0.489756	0.242	0.118	2.95987e-16
TCF25	1.85881e-20	0.315753	0.47	0.282	3.96874e-16
CCDC59	2.27711e-20	0.242793	0.336	0.177	4.86186e-16
TSPYL2	3.84307e-20	0.382374	0.174	0.067	8.20533e-16
CNOT1	4.01077e-20	0.315525	0.269	0.133	8.56339e-16
ATP5B	4.13916e-20	0.479981	0.307	0.175	8.83752e-16
EZR	4.46684e-20	0.403355	0.765	0.583	9.53715e-16
ALDOA	4.52848e-20	0.304149	0.658	0.465	9.66876e-16
MGEA5	5.04695e-20	0.461436	0.208	0.094	1.07757e-15
ATP5H	5.3397e-20	0.40866	0.228	0.108	1.14008e-15
SEC61G	5.35401e-20	0.307561	0.427	0.262	1.14313e-15
GCC2	7.34304e-20	0.321003	0.345	0.192	1.56781e-15
BACH1	7.7608e-20	0.319934	0.175	0.068	1.65701e-15
RNF145	7.77876e-20	0.309226	0.2	0.085	1.66084e-15
AES	1.19922e-19	0.392564	0.381	0.226	2.56046e-15
ACADVL	1.91849e-19	0.260006	0.292	0.148	4.09616e-15
CCNL1	2.56897e-19	0.304014	0.477	0.299	5.485e-15
SMCHD1	2.93887e-19	0.252322	0.615	0.411	6.27478e-15
C14orf2	5.20054e-19	0.391865	0.285	0.155	1.11037e-14
RACK1	5.2623e-19	-0.240388	0.992	0.998	1.12355e-14
PNN	6.70922e-19	0.265666	0.492	0.309	1.43249e-14
KLHL24	6.72462e-19	0.322572	0.224	0.104	1.43577e-14
SRRM1	6.75688e-19	0.264865	0.572	0.378	1.44266e-14
USF1	7.24994e-19	0.3525	0.174	0.07	1.54794e-14
FAM177B	7.6624e-19	0.351799	0.18	0.074	1.636e-14
CYCS	8.56211e-19	0.318744	0.395	0.233	1.8281e-14
ERGIC1	8.61481e-19	0.293473	0.276	0.142	1.83935e-14
NIBAN3	8.88739e-19	-0.875937	0.218	0.332	1.89755e-14
IFRD1	9.07513e-19	0.397407	0.187	0.079	1.93763e-14
LSM7	9.72046e-19	0.257614	0.703	0.492	2.07542e-14
NCBP2-AS2	1.0119e-18	0.336308	0.17	0.069	2.16051e-14
FCMR	1.25377e-18	-0.490027	0.753	0.74	2.67692e-14
BZW1	1.39676e-18	0.262411	0.411	0.247	2.98222e-14
IGLV2-23	1.44297e-18	-0.427576	0.106	0.026	3.08089e-14
ZFP36L1	1.52984e-18	-0.530175	0.699	0.733	3.26636e-14
ZNF107	1.60276e-18	0.351155	0.332	0.189	3.42205e-14
ATP5MG	1.73243e-18	-0.509268	0.319	0.471	3.69891e-14
IFI30	1.79207e-18	-0.926138	0.158	0.272	3.82625e-14
NBPF14	2.17402e-18	0.297602	0.198	0.087	4.64175e-14
KTN1	2.78855e-18	0.303473	0.407	0.252	5.95384e-14
ELOB	2.97156e-18	0.277216	0.601	0.414	6.34458e-14
IGHG1	3.45631e-18	0.329554	0.202	0.09	7.37956e-14
GGNBP2	3.57929e-18	0.199792	0.408	0.235	7.64214e-14
PRCD	3.659e-18	0.235033	0.129	0.041	7.81234e-14
RPL41	4.46197e-18	0.185762	0.627	0.313	9.52676e-14
PCIF1	5.03952e-18	0.240488	0.318	0.172	1.07599e-13
ARPC2	6.08204e-18	-0.429739	0.736	0.76	1.29858e-13
SELL	9.07887e-18	-0.575973	0.632	0.667	1.93843e-13
B2M	9.7373e-18	-0.247377	0.999	1	2.07901e-13
RPL36A	1.0472e-17	0.195604	0.5	0.292	2.23587e-13
HSPA5	1.32231e-17	0.337399	0.361	0.213	2.82326e-13
SECISBP2L	1.34943e-17	0.255479	0.309	0.17	2.88117e-13
PNRC1	1.37529e-17	-0.499334	0.75	0.762	2.93638e-13
CLIC1	1.55841e-17	-0.461952	0.712	0.743	3.32736e-13
USMG5	1.65002e-17	0.447754	0.269	0.15	3.52295e-13
ITM2C	1.93382e-17	0.351042	0.218	0.104	4.1289e-13
EIF5A	1.97722e-17	0.276929	0.655	0.465	4.22155e-13
SP100	2.01657e-17	0.228125	0.731	0.523	4.30558e-13
PHF20	2.42071e-17	0.245997	0.378	0.223	5.16846e-13
PTP4A1	2.68622e-17	0.258653	0.11	0.033	5.73536e-13
TLR10	2.77639e-17	-0.657488	0.091	0.188	5.92788e-13
COPS9	6.27694e-17	0.323184	0.285	0.16	1.34019e-12
C5orf24	8.93726e-17	0.26476	0.166	0.069	1.90819e-12
ELF1	9.08266e-17	0.220982	0.473	0.3	1.93924e-12
PRRC2C	9.59465e-17	0.207224	0.549	0.361	2.04855e-12
IFI44L	1.06764e-16	0.296015	0.105	0.031	2.27952e-12
DUSP2	1.08542e-16	0.725177	0.154	0.062	2.31748e-12
HIST1H1C	1.28076e-16	0.281043	0.231	0.114	2.73454e-12
MYL12A	1.64854e-16	-0.422032	0.807	0.808	3.5198e-12
FUS	1.7084e-16	0.207641	0.625	0.423	3.64761e-12
LYN	1.76957e-16	0.19744	0.527	0.35	3.7782e-12
ZCCHC11	1.99e-16	0.395568	0.186	0.088	4.24885e-12
PRDM2	2.00216e-16	0.248344	0.281	0.153	4.27481e-12
ATP5A1	2.35234e-16	0.38864	0.253	0.139	5.02248e-12
KPNB1	2.70044e-16	0.188767	0.392	0.236	5.7657e-12
KLF9	3.02343e-16	0.239073	0.161	0.067	6.45532e-12
SNRPD3	3.11248e-16	0.310475	0.278	0.157	6.64545e-12
ATP5F1A	4.05104e-16	-0.723913	0.181	0.281	8.64937e-12
MATR3.1	4.75358e-16	0.256306	0.384	0.238	1.01494e-11
KLF2	4.89739e-16	-0.492306	0.717	0.733	1.04564e-11
CAPN7	7.24091e-16	0.28744	0.227	0.114	1.54601e-11
BCLAF1	8.0611e-16	0.199156	0.427	0.271	1.72113e-11
ADGRE5	8.41651e-16	0.304388	0.223	0.11	1.79701e-11
LINC01480	8.88439e-16	0.293462	0.17	0.074	1.89691e-11
AMD1	9.31811e-16	0.226176	0.267	0.145	1.98951e-11
UTY	1.00399e-15	0.265873	0.174	0.077	2.14362e-11
TLE1	1.20649e-15	0.248193	0.227	0.114	2.57598e-11
LYRM2	1.32463e-15	0.203802	0.224	0.111	2.82821e-11
H2AFX	1.58172e-15	0.371379	0.123	0.045	3.37713e-11
HMGA1	1.75598e-15	0.220166	0.345	0.204	3.7492e-11
MRPL54	1.96065e-15	0.184643	0.383	0.234	4.18618e-11
TFEB	2.00369e-15	0.230979	0.294	0.166	4.27808e-11
ZNF331	2.26432e-15	0.572754	0.119	0.043	4.83454e-11
ANKRD49	2.49941e-15	0.262005	0.189	0.09	5.33649e-11
TMEM258	2.64664e-15	0.21124	0.496	0.333	5.65083e-11
PAPD4	2.74408e-15	0.32834	0.133	0.053	5.85889e-11
TCIRG1	2.79851e-15	0.297349	0.257	0.142	5.9751e-11
ETV6	2.90881e-15	0.192526	0.116	0.04	6.21059e-11
EML4	3.11577e-15	0.238668	0.376	0.231	6.65248e-11
IGLV3-21	3.15421e-15	-0.698797	0.115	0.037	6.73455e-11
C19orf24	3.30661e-15	0.28591	0.139	0.056	7.05993e-11
SPIB	3.56559e-15	-0.767409	0.389	0.465	7.61289e-11
INSIG1	3.73048e-15	0.368739	0.216	0.111	7.96495e-11
CYTIP	3.89216e-15	0.275097	0.438	0.284	8.31015e-11
IGHA1	3.95539e-15	0.271329	0.269	0.147	8.44516e-11
GABPB1-IT1	4.09525e-15	-0.668372	0.037	0.106	8.74377e-11
MARCKSL1	4.10522e-15	-0.779517	0.235	0.33	8.76504e-11
GNAS	4.31495e-15	0.183428	0.453	0.29	9.21286e-11
ISG20	4.68815e-15	0.209259	0.819	0.668	1.00097e-10
EVI2B	5.63891e-15	-0.622702	0.57	0.592	1.20396e-10
DDX18	5.79591e-15	0.288419	0.344	0.211	1.23749e-10
IGLV1-47	6.25427e-15	0.103873	0.144	0.058	1.33535e-10
EBLN3P	6.26164e-15	0.238026	0.424	0.277	1.33692e-10
BUD23	6.82728e-15	0.109681	0.262	0.138	1.45769e-10
COX17	6.89697e-15	0.28181	0.299	0.174	1.47257e-10
CRIP2	8.68141e-15	-0.899435	0.059	0.136	1.85357e-10
DDIT4	9.32977e-15	0.315148	0.383	0.24	1.992e-10
LSP1	1.02712e-14	-0.444567	0.752	0.749	2.193e-10
FAM96A	1.17475e-14	0.367037	0.279	0.165	2.5082e-10
CCNT1	1.72006e-14	0.21961	0.153	0.067	3.6725e-10
SNRPG	2.10393e-14	0.226523	0.423	0.277	4.4921e-10
COPS2	2.1063e-14	0.185136	0.223	0.114	4.49717e-10
ELF2	2.18414e-14	0.20507	0.229	0.12	4.66335e-10
SNHG8	2.23035e-14	0.173839	0.584	0.404	4.76202e-10
POLR2L	2.47657e-14	0.268865	0.384	0.249	5.28773e-10
DDX3Y	2.67934e-14	0.227602	0.189	0.091	5.72065e-10
THEMIS2	2.87759e-14	0.261767	0.147	0.063	6.14395e-10
NBPF26	3.27619e-14	0.306628	0.194	0.099	6.99499e-10
IGKC	3.88142e-14	0.356912	0.5	0.345	8.28722e-10
GPR183	4.13487e-14	0.292042	0.294	0.172	8.82836e-10
RPN2	4.28071e-14	0.333008	0.178	0.089	9.13975e-10
SQSTM1	4.30853e-14	0.224644	0.492	0.327	9.19915e-10
RARRES3	4.475e-14	0.324734	0.133	0.056	9.55458e-10
AKIRIN2	4.76384e-14	0.186686	0.342	0.206	1.01713e-09
CYB5R3	5.65189e-14	0.133387	0.357	0.216	1.20673e-09
RPN1	5.8287e-14	0.324353	0.166	0.08	1.24449e-09
TLK1	5.90919e-14	0.162016	0.255	0.14	1.26167e-09
TMEM131L	5.96583e-14	0.185228	0.28	0.158	1.27377e-09
DDX39A	6.16799e-14	0.187519	0.349	0.213	1.31693e-09
IGKV4-1	6.40416e-14	-0.0469065	0.149	0.062	1.36735e-09
PAK2	7.01058e-14	0.162914	0.399	0.25	1.49683e-09
ATP5C1	9.29829e-14	0.34087	0.215	0.118	1.98528e-09
BAZ2A	9.77816e-14	0.193473	0.32	0.192	2.08773e-09
NFKBIZ	1.06557e-13	0.294968	0.19	0.096	2.27511e-09
PNPLA2	1.09507e-13	0.184167	0.433	0.277	2.33808e-09
C19orf70	1.32916e-13	0.324941	0.184	0.094	2.83789e-09
SRPRA	1.4435e-13	0.181911	0.257	0.145	3.08201e-09
S1PR4	1.54393e-13	-0.63298	0.18	0.272	3.29644e-09
CA5B	1.9341e-13	0.242467	0.192	0.097	4.12949e-09
UBXN4	1.96474e-13	0.150313	0.433	0.278	4.19492e-09
PRDX6	2.21872e-13	0.177399	0.409	0.265	4.7372e-09
COX6C	2.26996e-13	0.194994	0.67	0.501	4.84659e-09
SEPTIN6	2.29991e-13	-0.693507	0.205	0.293	4.91053e-09
CLK1	2.44084e-13	0.181842	0.305	0.179	5.21145e-09
FAM103A1	2.48612e-13	0.228974	0.103	0.037	5.30812e-09
UPF2	2.48637e-13	0.241519	0.259	0.15	5.30864e-09
NUP58	2.49728e-13	0.261736	0.158	0.074	5.33195e-09
CBWD5	2.93708e-13	0.236894	0.144	0.064	6.27095e-09
CCDC69	2.96514e-13	0.20461	0.269	0.155	6.33087e-09
IGKV3-15	3.07181e-13	-0.183545	0.157	0.069	6.55863e-09
C8orf59	3.13947e-13	0.351077	0.256	0.155	6.70309e-09
TCL1A	3.26477e-13	-0.865949	0.563	0.559	6.9706e-09
IGKV3-11	3.29337e-13	-0.286018	0.13	0.052	7.03167e-09
HIP1R	3.39756e-13	0.224397	0.223	0.121	7.25413e-09
HAGHL	3.5311e-13	0.236233	0.167	0.079	7.53925e-09
ENSA	4.19247e-13	0.100934	0.471	0.309	8.95135e-09
INPP5D	4.20728e-13	0.197257	0.327	0.202	8.98296e-09
TNFAIP3	6.24167e-13	0.460369	0.16	0.077	1.33266e-08
TARSL2	6.38046e-13	0.230172	0.186	0.094	1.36229e-08
DPM3	6.79406e-13	0.219977	0.18	0.091	1.4506e-08
FAM96B	7.07177e-13	0.279596	0.184	0.095	1.50989e-08
SP140L	7.57718e-13	0.238513	0.302	0.186	1.6178e-08
PSMD7	8.85804e-13	0.14221	0.348	0.214	1.89128e-08
RSF1	8.97002e-13	0.191174	0.342	0.213	1.91519e-08
RPS19BP1	8.98967e-13	0.33049	0.168	0.086	1.91938e-08
RSRC2	8.99033e-13	0.24895	0.331	0.208	1.91953e-08
SUPV3L1	9.8848e-13	0.186047	0.135	0.058	2.1105e-08
MED30	1.02407e-12	0.18935	0.234	0.13	2.1865e-08
TOMM6	1.05902e-12	-0.645309	0.213	0.302	2.26111e-08
CDK11A	1.08669e-12	0.284109	0.164	0.081	2.32019e-08
ARHGDIA	1.09072e-12	0.177617	0.481	0.331	2.32879e-08
RBM17	1.22024e-12	0.106	0.374	0.235	2.60534e-08
UBE2B	1.27295e-12	0.170104	0.419	0.277	2.71788e-08
ATF4	1.34572e-12	0.111643	0.307	0.182	2.87325e-08
TUBB	1.40155e-12	-0.644322	0.384	0.447	2.99246e-08
ZNF24	1.44634e-12	0.195589	0.356	0.226	3.08809e-08
SRM	1.56201e-12	0.138165	0.141	0.063	3.33506e-08
HBP1	1.67277e-12	0.200859	0.24	0.135	3.57154e-08
GCNT1	1.73359e-12	-0.466583	0.042	0.106	3.70139e-08
DDX50	1.77467e-12	0.196477	0.206	0.111	3.7891e-08
FNBP4	1.80802e-12	0.179924	0.422	0.28	3.86031e-08
ATP6V0C	2.06309e-12	0.226131	0.646	0.473	4.40491e-08
ZNF431	2.06594e-12	0.198801	0.188	0.099	4.41099e-08
DDX24	2.0692e-12	0.202661	0.43	0.289	4.41794e-08
MT-ND6	2.13741e-12	0.239132	0.405	0.26	4.56359e-08
TERF2IP	2.18988e-12	0.147796	0.376	0.242	4.67561e-08
NFKBIB	2.3915e-12	0.175202	0.151	0.07	5.10609e-08
RB1	2.4247e-12	0.194502	0.373	0.244	5.17697e-08
TMEM123	2.73091e-12	0.234721	0.435	0.297	5.83076e-08
SNRPB	2.93068e-12	0.11652	0.486	0.329	6.2573e-08
TROVE2	3.0273e-12	0.294048	0.135	0.063	6.46358e-08
HLA-DRB1	3.20819e-12	0.162466	0.985	0.914	6.8498e-08
ATP5F1	3.29168e-12	0.334576	0.245	0.15	7.02806e-08
ATP5F1D	3.38169e-12	-0.526147	0.272	0.367	7.22026e-08
IDS	3.38197e-12	0.176822	0.314	0.194	7.22085e-08
ALG13	3.50658e-12	0.229601	0.181	0.093	7.4869e-08
SNRPA1	3.81173e-12	0.150692	0.329	0.205	8.13842e-08
NDUFB8	3.8189e-12	-0.704237	0.228	0.306	8.15373e-08
NOP53	4.11654e-12	-0.451512	0.834	0.811	8.78923e-08
RPS6KB2	4.59496e-12	0.236452	0.132	0.06	9.81069e-08
ARIH2	4.7337e-12	0.140603	0.278	0.164	1.01069e-07
CCNH	4.92253e-12	0.150726	0.19	0.099	1.05101e-07
BCL10	5.07413e-12	0.0789899	0.221	0.12	1.08338e-07
MGAT5	5.47019e-12	0.165777	0.181	0.094	1.16794e-07
IRF8	5.52312e-12	0.143166	0.593	0.425	1.17924e-07
CIAO2A	5.75727e-12	-0.630897	0.18	0.264	1.22924e-07
WASF2	7.26883e-12	0.198912	0.451	0.31	1.55197e-07
DERL3	7.72407e-12	0.206183	0.171	0.086	1.64917e-07
HSP90B1	7.95171e-12	0.221751	0.539	0.382	1.69777e-07
ODF3B	1.01825e-11	0.184622	0.104	0.041	2.17406e-07
POU2F2	1.04907e-11	0.19498	0.634	0.468	2.23986e-07
HNRNPF	1.09245e-11	-0.57508	0.38	0.445	2.33249e-07
SREBF2	1.09765e-11	0.153117	0.211	0.115	2.34358e-07
CUL5	1.18042e-11	0.156113	0.209	0.115	2.52031e-07
SECISBP2	1.23083e-11	0.141933	0.308	0.189	2.62795e-07
GIMAP7	1.25941e-11	-0.504133	0.041	0.1	2.68896e-07
S100A8	1.30696e-11	0.819429	0.139	0.063	2.79049e-07
COQ10B	1.33475e-11	0.178116	0.18	0.094	2.84983e-07
CDC25B	1.42567e-11	0.249062	0.193	0.105	3.04396e-07
ZNF394	1.47891e-11	0.163698	0.175	0.09	3.15762e-07
MDM4	1.58877e-11	0.178112	0.276	0.169	3.39219e-07
ARPC1B	1.67019e-11	-0.458337	0.62	0.643	3.56603e-07
SPPL2A	1.8554e-11	0.144131	0.179	0.093	3.96148e-07
CWC15	1.87122e-11	0.134088	0.289	0.176	3.99524e-07
ERICH1	1.94079e-11	0.169464	0.272	0.164	4.14378e-07
CIRBP	1.99629e-11	0.154886	0.914	0.784	4.26229e-07
CCDC18-AS1	2.01333e-11	-0.662503	0.159	0.238	4.29867e-07
VPS37B	2.01824e-11	0.132681	0.261	0.154	4.30914e-07
WBP11	2.27203e-11	0.193051	0.243	0.144	4.851e-07
CNBP	2.38038e-11	-0.414941	0.732	0.709	5.08234e-07
ATP5MC3	2.40532e-11	-0.538309	0.207	0.292	5.1356e-07
C19orf66	2.60976e-11	0.275809	0.164	0.087	5.5721e-07
ISCA1	2.8089e-11	0.174727	0.158	0.078	5.99728e-07
ATP6V1G1	2.86297e-11	-0.412585	0.765	0.75	6.11272e-07
HLA-F	2.87364e-11	0.0846164	0.559	0.383	6.13551e-07
USP16	2.91326e-11	0.150079	0.255	0.151	6.2201e-07
CSK	3.08438e-11	-0.56929	0.419	0.479	6.58545e-07
TMEM243	3.12639e-11	0.112398	0.559	0.388	6.67516e-07
NPM1	3.19823e-11	-0.32144	0.898	0.872	6.82853e-07
CD82	4.05264e-11	-0.598417	0.313	0.389	8.6528e-07
PARP15	4.11451e-11	0.147614	0.303	0.189	8.78488e-07
MYC	4.22689e-11	0.225061	0.324	0.207	9.02484e-07
SLC44A2	4.24749e-11	0.112324	0.414	0.275	9.06881e-07
SLC38A2	4.28446e-11	0.223971	0.235	0.14	9.14775e-07
RABAC1	4.52603e-11	0.133661	0.571	0.411	9.66353e-07
SEC14L1	4.54109e-11	0.173885	0.14	0.067	9.69569e-07
COX7A2	4.55992e-11	0.141204	0.619	0.457	9.73588e-07
PSMB4	4.60571e-11	0.102128	0.254	0.15	9.83365e-07
CEP95	4.61412e-11	0.253048	0.159	0.082	9.85161e-07
BRK1	4.68128e-11	-0.523422	0.47	0.511	9.99501e-07
RP9	4.82669e-11	0.285594	0.159	0.084	1.03055e-06
MAN1A2	5.38388e-11	0.174466	0.16	0.082	1.14951e-06
IDI1	5.42134e-11	0.221953	0.258	0.158	1.15751e-06
RBM26	5.63665e-11	0.155984	0.199	0.111	1.20348e-06
ZKSCAN1	5.8223e-11	0.194262	0.17	0.09	1.24312e-06
PHF1	6.0887e-11	0.120882	0.342	0.219	1.3e-06
IGHV3-23	6.62906e-11	-0.00016236	0.172	0.087	1.41537e-06
RPS27L	6.6793e-11	0.314969	0.207	0.123	1.4261e-06
MVD	6.70299e-11	0.177609	0.138	0.066	1.43116e-06
PHC3	6.78176e-11	0.0899839	0.235	0.136	1.44797e-06
SREK1IP1	6.83262e-11	0.187635	0.158	0.082	1.45883e-06
RALGAPA1	6.98788e-11	0.151389	0.13	0.06	1.49198e-06
ZMYM2	7.345e-11	0.137174	0.175	0.092	1.56823e-06
ZNF326	7.71368e-11	0.19075	0.14	0.069	1.64695e-06
PIM2	7.78357e-11	0.134901	0.375	0.248	1.66187e-06
RNPC3	8.43447e-11	0.130433	0.18	0.096	1.80084e-06
SNRPD1	8.66512e-11	0.0586433	0.326	0.204	1.85009e-06
ICAM3	8.67663e-11	-0.591902	0.395	0.446	1.85255e-06
POMP	1.0113e-10	0.112086	0.437	0.299	2.15924e-06
IGHV4-39	1.04498e-10	-0.0181239	0.144	0.069	2.23114e-06
VCPKMT	1.07706e-10	0.148767	0.197	0.109	2.29963e-06
TMEM242	1.08176e-10	0.14773	0.12	0.054	2.30966e-06
LYSMD2	1.08346e-10	-0.553179	0.115	0.189	2.31329e-06
CHRAC1	1.08518e-10	0.177976	0.192	0.107	2.31697e-06
ATP5I	1.15305e-10	0.320376	0.278	0.182	2.46188e-06
FCRL5	1.27541e-10	0.302967	0.13	0.063	2.72312e-06
SKIV2L2	1.28842e-10	0.240561	0.102	0.043	2.75092e-06
TSTD1	1.31032e-10	0.126142	0.568	0.409	2.79767e-06
LENG8	1.39315e-10	0.13138	0.29	0.184	2.97451e-06
ZNF644	1.48354e-10	0.190049	0.18	0.099	3.16751e-06
COPA	1.49005e-10	0.129948	0.19	0.105	3.18141e-06
IGKV1-39	1.50301e-10	0.116514	0.139	0.066	3.20907e-06
PRPF4B	1.51144e-10	0.203656	0.286	0.184	3.22708e-06
H3F3B	1.5721e-10	0.242185	0.945	0.89	3.35659e-06
DNTTIP2	1.59163e-10	0.174355	0.253	0.153	3.3983e-06
LIMS2	1.59539e-10	0.235722	0.13	0.062	3.40633e-06
SCAND1	1.6071e-10	0.0822527	0.514	0.362	3.43133e-06
SRSF5	1.75951e-10	-0.377749	0.74	0.706	3.75672e-06
DCTN4	1.76565e-10	0.10447	0.14	0.068	3.76985e-06
CD19	1.77552e-10	0.166709	0.532	0.389	3.79091e-06
KLF10	1.88797e-10	0.256883	0.122	0.057	4.03101e-06
YWHAB	1.89916e-10	-0.393483	0.663	0.677	4.0549e-06
SAT2	2.13899e-10	0.133032	0.275	0.17	4.56696e-06
SF3B1	2.14665e-10	0.105177	0.476	0.334	4.58331e-06
ZDHHC6	2.24617e-10	0.156937	0.164	0.086	4.79579e-06
BTAF1	2.25411e-10	0.127911	0.142	0.07	4.81275e-06
RABGGTB	2.26964e-10	0.157025	0.212	0.122	4.84592e-06
S100A10	2.29933e-10	-0.855582	0.383	0.436	4.90929e-06
ZFAND2A	2.56996e-10	0.137248	0.145	0.072	5.48712e-06
AHCY	2.58748e-10	0.119759	0.177	0.096	5.52452e-06
CCDC174	2.6015e-10	0.180959	0.164	0.088	5.55446e-06
MMAB	2.72888e-10	0.171439	0.109	0.048	5.82643e-06
ZNF706	2.77293e-10	-0.588795	0.365	0.425	5.92049e-06
ATP5PB	2.7926e-10	-0.572989	0.188	0.264	5.96248e-06
RPAIN	2.84658e-10	0.254119	0.139	0.071	6.07773e-06
JCHAIN	2.87249e-10	-0.125254	0.54	0.358	6.13305e-06
NDUFB4	2.91174e-10	0.0949224	0.446	0.311	6.21685e-06
ARF1	3.14337e-10	0.0999039	0.636	0.468	6.71141e-06
PIM3	3.73765e-10	0.185777	0.202	0.118	7.98025e-06
SUN1	3.92776e-10	0.176477	0.113	0.052	8.38616e-06
HLA-DQB1	4.24301e-10	-0.293783	0.919	0.844	9.05926e-06
KDM5A	4.42735e-10	0.118585	0.23	0.137	9.45284e-06
ATF7IP	4.67517e-10	0.118731	0.354	0.237	9.98196e-06
CD79A	4.82095e-10	-0.260186	0.981	0.975	1.02932e-05
ILF3-AS1	4.94128e-10	0.276306	0.107	0.049	1.05501e-05
EAPP	4.96986e-10	0.0944341	0.386	0.262	1.06111e-05
MRFAP1	4.97253e-10	0.112342	0.243	0.147	1.06168e-05
AFF4	5.12784e-10	0.102641	0.359	0.239	1.09485e-05
IFNAR1	5.2656e-10	0.0946943	0.271	0.168	1.12426e-05
ACTR3	5.40859e-10	-0.527746	0.459	0.498	1.15479e-05
SMC5	5.41011e-10	0.0743239	0.175	0.094	1.15511e-05
CEBPZ	5.65592e-10	0.1706	0.203	0.119	1.2076e-05
ID3	5.8376e-10	-0.582442	0.143	0.221	1.24639e-05
SPINT2	5.9489e-10	0.0646069	0.338	0.217	1.27015e-05
MBNL2	6.12464e-10	0.167446	0.172	0.094	1.30767e-05
ATP6V0E1	6.30411e-10	-0.507587	0.511	0.539	1.34599e-05
SNHG32	6.37089e-10	-0.558718	0.096	0.162	1.36025e-05
TMEM41B	6.48647e-10	0.142456	0.113	0.052	1.38493e-05
NAA38	6.72583e-10	0.162131	0.28	0.182	1.43603e-05
IMP3	6.73264e-10	-0.562492	0.27	0.342	1.43749e-05
RIC1	6.90869e-10	0.153629	0.218	0.13	1.47508e-05
CHD2	6.99031e-10	0.108272	0.381	0.257	1.4925e-05
DBF4	7.08098e-10	0.119593	0.144	0.073	1.51186e-05
PLEKHG1	7.10351e-10	0.102637	0.191	0.108	1.51667e-05
GNPTAB	7.17198e-10	0.171609	0.145	0.075	1.53129e-05
TAF9	7.2565e-10	0.0853522	0.253	0.152	1.54934e-05
RPIA	8.28148e-10	0.207508	0.106	0.048	1.76818e-05
EIF2S2	9.06887e-10	0.156818	0.318	0.212	1.93629e-05
GINM1	9.37304e-10	0.12773	0.186	0.105	2.00124e-05
AKAP9	9.46685e-10	0.136491	0.29	0.189	2.02127e-05
EIF2AK2	9.71881e-10	0.164859	0.178	0.099	2.07506e-05
ZC3H15	9.89235e-10	0.158488	0.413	0.288	2.11212e-05
PSMB9	1.01607e-09	-0.41999	0.6	0.619	2.16942e-05
RNASEK	1.02296e-09	-0.398248	0.678	0.681	2.18412e-05
PCBP2	1.06598e-09	0.334545	0.859	0.743	2.27597e-05
LYL1	1.12584e-09	-0.497942	0.093	0.16	2.40377e-05
CAMK2D	1.18177e-09	0.116738	0.338	0.226	2.52319e-05
RUBCNL	1.33479e-09	0.137839	0.355	0.238	2.8499e-05
NCF1	1.47892e-09	-0.379145	0.781	0.738	3.15765e-05
ZFAND5	1.49967e-09	0.140575	0.209	0.124	3.20195e-05
MICOS10	1.50932e-09	-0.620355	0.125	0.192	3.22255e-05
MTMR6	1.51081e-09	0.164106	0.102	0.045	3.22574e-05
LLPH	1.56251e-09	0.161776	0.177	0.099	3.33611e-05
CTBS	1.61752e-09	0.107689	0.174	0.096	3.45357e-05
BCAS2	1.61978e-09	0.118452	0.219	0.131	3.45839e-05
CSGALNACT1	1.63255e-09	0.230212	0.132	0.068	3.48567e-05
ATP5F1C	1.64534e-09	-0.55496	0.159	0.229	3.51297e-05
STK17A	1.66082e-09	-0.579397	0.389	0.439	3.54603e-05
CSNK1G3	1.70128e-09	0.121638	0.216	0.129	3.63241e-05
MTRF1L	1.70744e-09	0.161461	0.106	0.048	3.64555e-05
AKAP2	1.78383e-09	0.252016	0.123	0.062	3.80865e-05
ATP5G1	1.81004e-09	0.259882	0.189	0.114	3.86461e-05
IGHV3-21	1.8837e-09	0.337346	0.105	0.047	4.02189e-05
RANBP2	1.90194e-09	0.119604	0.177	0.099	4.06082e-05
PPP2R5E	1.92322e-09	0.0980638	0.178	0.099	4.10626e-05
RIOK3	2.00015e-09	0.10125	0.252	0.156	4.27053e-05
ETF1	2.09223e-09	0.21901	0.136	0.071	4.46712e-05
GTF2IRD2B	2.11291e-09	0.142689	0.176	0.099	4.51127e-05
CNOT4	2.12303e-09	0.189641	0.15	0.082	4.53288e-05
LAMP1	2.21918e-09	0.0936973	0.293	0.187	4.73817e-05
HMGCS1	2.46474e-09	0.183881	0.101	0.045	5.26247e-05
U2SURP	2.47418e-09	0.106651	0.36	0.242	5.28263e-05
PLIN2	2.47875e-09	0.111235	0.108	0.049	5.29239e-05
UVRAG	2.57238e-09	0.134159	0.413	0.29	5.49228e-05
CDKN2AIP	2.60222e-09	0.211036	0.135	0.07	5.55601e-05
FXR1	2.63262e-09	0.107588	0.273	0.174	5.6209e-05
ANP32E	2.72074e-09	0.0944427	0.232	0.141	5.80904e-05
SF1	2.80962e-09	0.132901	0.812	0.641	5.99882e-05
KBTBD2	2.89221e-09	0.0951476	0.107	0.049	6.17516e-05
FAM133B	2.96421e-09	0.118869	0.243	0.152	6.32888e-05
SREK1	3.24975e-09	0.156923	0.196	0.116	6.93853e-05
IGHV1-2	3.28744e-09	0.139459	0.106	0.048	7.01901e-05
IGHV4-34	3.37152e-09	0.589789	0.126	0.063	7.19852e-05
ANKRD12	3.38658e-09	0.134575	0.517	0.37	7.23069e-05
ZRANB2	3.42817e-09	0.121526	0.351	0.242	7.31949e-05
BCL2A1	3.50023e-09	0.265474	0.134	0.07	7.47335e-05
PARP1	3.67485e-09	-0.609481	0.4	0.44	7.84618e-05
COX19	3.69893e-09	0.173956	0.166	0.093	7.89759e-05
YTHDC1	3.71154e-09	0.192727	0.264	0.173	7.9245e-05
NDUFA6	3.76722e-09	0.108889	0.3	0.196	8.04339e-05
HLA-A	3.76898e-09	0.119775	0.99	0.947	8.04716e-05
FAM177A1	3.82737e-09	0.148884	0.145	0.077	8.17182e-05
SAFB2	3.99669e-09	0.107531	0.207	0.123	8.53333e-05
IFI27L2	4.14013e-09	0.0729763	0.218	0.132	8.8396e-05
SLC2A1	4.23678e-09	0.0866644	0.14	0.073	9.04594e-05
IGHV4-59	4.26457e-09	0.373386	0.132	0.067	9.10529e-05
AFF1	4.32251e-09	0.130133	0.161	0.089	9.22899e-05
ZC3H7A	4.34266e-09	0.139074	0.164	0.092	9.27201e-05
AKAP13	4.35729e-09	0.128158	0.38	0.264	9.30325e-05
ARID5B	4.42993e-09	0.0755642	0.396	0.268	9.45835e-05
KANSL2	4.53977e-09	0.110033	0.113	0.053	9.69286e-05
MYL12B	4.63542e-09	-0.509407	0.591	0.597	9.89709e-05
NRROS	4.66756e-09	0.140848	0.148	0.08	9.96571e-05
ATF7IP2	4.69442e-09	0.113708	0.219	0.133	0.000100231
ARL6IP5	4.9011e-09	-0.477019	0.491	0.519	0.000104643
STARD3	4.97442e-09	0.155537	0.181	0.106	0.000106209
SOCS1	5.27543e-09	0.0167341	0.154	0.082	0.000112636
ATP6V1F	5.3874e-09	0.0852109	0.462	0.327	0.000115026
DYNLL1	5.78783e-09	-0.576303	0.254	0.324	0.000123576
CHD9	5.89365e-09	0.0932553	0.267	0.171	0.000125835
CEBPB	6.05075e-09	-0.456288	0.066	0.123	0.00012919
CPSF6	6.51192e-09	0.107448	0.252	0.16	0.000139036
WSB1	6.57962e-09	0.0928702	0.391	0.273	0.000140481
NSRP1	6.65972e-09	0.156202	0.172	0.099	0.000142192
ATRX	6.66428e-09	0.0845755	0.411	0.286	0.000142289
XPO4	6.92975e-09	0.1185	0.168	0.095	0.000147957
TWF1	7.12239e-09	0.0867795	0.106	0.05	0.00015207
SLC25A36	7.30857e-09	0.151618	0.19	0.112	0.000156045
SELENOK	7.38868e-09	0.0784725	0.33	0.218	0.000157756
PAFAH1B2	7.56195e-09	0.0927447	0.113	0.054	0.000161455
NRDC	7.56532e-09	0.0593924	0.231	0.142	0.000161527
VTI1A	7.57795e-09	0.147587	0.152	0.084	0.000161797
BNIP2	7.61797e-09	0.0596179	0.356	0.243	0.000162651
SMNDC1	8.17634e-09	0.110648	0.185	0.109	0.000174573
DDHD1	8.25591e-09	0.158833	0.124	0.063	0.000176272
RHBDD2	8.95243e-09	0.0696942	0.181	0.104	0.000191143
CLEC2B	8.97689e-09	0.0874454	0.294	0.194	0.000191666
LSM3	9.25534e-09	0.0588993	0.33	0.219	0.000197611
UFC1	9.36262e-09	0.0938288	0.446	0.316	0.000199901
GOSR1	9.37754e-09	0.100453	0.149	0.081	0.00020022
TNFRSF10A	9.48372e-09	0.133961	0.102	0.048	0.000202487
NDUFA11	9.90937e-09	-0.541239	0.303	0.363	0.000211575
PTPRC	9.96215e-09	-0.320751	0.794	0.742	0.000212702
EIF1	1.00119e-08	0.192263	0.991	0.96	0.000213765
SZRD1	1.00324e-08	0.0797553	0.221	0.135	0.000214201
DDT	1.00738e-08	0.161332	0.402	0.286	0.000215085
CBWD1	1.01295e-08	0.123854	0.131	0.069	0.000216276
CDK5RAP3	1.02199e-08	0.0776464	0.294	0.195	0.000218205
PTAR1	1.03827e-08	0.112287	0.121	0.061	0.00022168
EIF2AK4	1.06236e-08	0.141268	0.112	0.055	0.000226825
DNM1L	1.07353e-08	0.146741	0.104	0.05	0.000229209
MED10	1.12815e-08	0.0586957	0.43	0.296	0.000240872
C1GALT1	1.13837e-08	0.138555	0.196	0.117	0.000243052
CHMP2B	1.1795e-08	0.147875	0.196	0.119	0.000251836
PRDM4	1.26157e-08	0.106921	0.132	0.069	0.000269358
TXN	1.26429e-08	0.108655	0.274	0.178	0.000269939
IGLC2	1.2848e-08	0.0570348	0.311	0.205	0.000274317
SNRPN	1.29459e-08	0.129658	0.28	0.186	0.000276408
HIST1H2BK	1.30964e-08	0.100239	0.17	0.097	0.000279621
CENPC	1.36549e-08	0.104015	0.223	0.138	0.000291545
BUD31	1.53879e-08	0.0715036	0.284	0.184	0.000328547
RPA3	1.65826e-08	0.239423	0.142	0.081	0.000354056
PHF3	1.75702e-08	0.0252752	0.297	0.196	0.000375141
RWDD1	1.75931e-08	0.070778	0.348	0.236	0.000375631
HINT1	1.98774e-08	-0.292326	0.884	0.879	0.000424402
BBX	2.01525e-08	0.0942401	0.322	0.219	0.000430276
DCP1A	2.05004e-08	0.150334	0.158	0.09	0.000437705
LMBR1L	2.11416e-08	0.0886801	0.132	0.07	0.000451395
LYST	2.29908e-08	0.0827322	0.28	0.184	0.000490877
PCED1B-AS1	2.30713e-08	-0.580457	0.142	0.205	0.000492596
DDX5	2.33853e-08	-0.337749	0.9	0.853	0.0004993
OXCT1	2.38238e-08	0.118987	0.115	0.058	0.000508662
N4BP2L1	2.49297e-08	0.0742305	0.225	0.14	0.000532274
GBP4	2.52205e-08	0.113286	0.118	0.06	0.000538484
RELB	2.56635e-08	0.0507213	0.282	0.183	0.000547942
GTF2B	2.67555e-08	0.071469	0.224	0.138	0.000571256
RC3H2	2.68735e-08	0.113173	0.129	0.068	0.000573777
FYB1	2.73677e-08	-0.598477	0.068	0.121	0.000584329
UQCRFS1	2.7383e-08	0.0493483	0.454	0.325	0.000584655
HLA-DMA	2.80328e-08	-0.346231	0.798	0.753	0.000598528
HLA-DMB	2.80856e-08	-0.467288	0.535	0.548	0.000599655
FKBP11	2.83854e-08	0.172244	0.119	0.062	0.000606057
GOLGB1	2.89771e-08	0.159317	0.16	0.092	0.000618691
C19orf48	3.12519e-08	0.126927	0.118	0.06	0.00066726
XAF1	3.21103e-08	0.129652	0.191	0.117	0.000685587
ZBTB8OS	3.26245e-08	0.069651	0.199	0.121	0.000696565
LMAN1	3.38211e-08	0.0580064	0.202	0.123	0.000722113
HSF1	3.48655e-08	0.046715	0.286	0.188	0.000744414
HNRNPA0	3.54972e-08	0.0939568	0.646	0.484	0.0007579
YBEY	3.55921e-08	0.0689086	0.145	0.08	0.000759927
CFAP97	3.67143e-08	0.102385	0.159	0.092	0.000783887
GYPC	3.72616e-08	0.105545	0.456	0.332	0.000795572
FAM173A	3.88281e-08	0.212311	0.118	0.063	0.000829018
NDUFB1	3.97941e-08	0.137666	0.283	0.191	0.000849643
IGHD	4.17509e-08	0.120103	0.476	0.352	0.000891423
SYAP1	4.24663e-08	0.0923875	0.139	0.075	0.000906698
CIR1	4.27485e-08	0.0762468	0.272	0.178	0.000912722
MECP2	4.46269e-08	0.145483	0.167	0.098	0.00095283
PDAP1	4.71622e-08	0.0287241	0.291	0.192	0.00100696
NOP58	4.80332e-08	0.0663711	0.308	0.209	0.00102556
TRAF3IP3	4.82279e-08	-0.493153	0.462	0.497	0.00102971
ST6GALNAC4	5.13846e-08	0.155395	0.106	0.053	0.00109711
PPP4R3B	5.26493e-08	0.0314643	0.252	0.161	0.00112412
PRKAR1A	5.27847e-08	0.0713336	0.291	0.197	0.00112701
NBPF10	5.30918e-08	0.182727	0.108	0.055	0.00113356
NDUFC2	5.52942e-08	-0.585939	0.185	0.245	0.00118059
COMMD2	5.93317e-08	0.11797	0.201	0.126	0.00126679
CD38	6.02875e-08	0.11221	0.102	0.05	0.0012872
THOC3	6.08103e-08	-0.455519	0.123	0.184	0.00129836
ITCH	6.40877e-08	0.0940506	0.14	0.078	0.00136834
EIF3F	6.48663e-08	-0.322844	0.817	0.773	0.00138496
ING3	6.67428e-08	0.0661298	0.126	0.067	0.00142503
GMFB	6.70183e-08	0.08053	0.146	0.082	0.00143091
EMD	6.71795e-08	0.0418307	0.369	0.255	0.00143435
SLC38A1	6.7332e-08	0.104822	0.413	0.298	0.00143761
RTF2	6.87361e-08	-0.505862	0.071	0.123	0.00146758
AC007384.1	7.12481e-08	0.124562	0.183	0.112	0.00152122
BLK	7.15212e-08	0.104861	0.549	0.411	0.00152705
NR1H2	7.17016e-08	0.142869	0.272	0.185	0.0015309
DENR	7.24626e-08	0.0743238	0.264	0.174	0.00154715
ZNF430	7.33643e-08	0.0806821	0.18	0.108	0.0015664
2025-03-06	7.44201e-08	0.123494	0.176	0.106	0.00158894
PAIP2	7.57911e-08	0.0854838	0.49	0.36	0.00161822
MAF1	7.89899e-08	-0.0158302	0.441	0.311	0.00168651
SNX3	8.35942e-08	-0.470058	0.678	0.645	0.00178482
BANK1	8.36903e-08	-0.349217	0.761	0.732	0.00178687
PCGF5	8.7951e-08	0.0365189	0.261	0.17	0.00187784
SUMO2	8.83117e-08	-0.346496	0.75	0.725	0.00188554
SERTAD2	8.8543e-08	0.103465	0.148	0.084	0.00189048
RBM33	8.85513e-08	0.158594	0.183	0.114	0.00189066
CD3E	8.92197e-08	-0.654215	0.067	0.119	0.00190493
CNDP2	9.20026e-08	0.0343204	0.226	0.143	0.00196435
DMXL1	9.74538e-08	0.029256	0.233	0.149	0.00208074
AP1G1	9.8542e-08	0.12269	0.112	0.058	0.00210397
WASHC4	9.95754e-08	0.0532425	0.33	0.23	0.00212603
DLD	9.9851e-08	0.132176	0.121	0.065	0.00213192
PARVB	1.00473e-07	-0.0222906	0.223	0.138	0.0021452
NEMF	1.01774e-07	0.0443374	0.278	0.186	0.00217298
SOD2	1.03344e-07	0.115309	0.208	0.132	0.0022065
MRPS21	1.05718e-07	0.069433	0.504	0.375	0.00225718
MRPL33	1.05749e-07	0.0512715	0.262	0.172	0.00225784
TMEM167B	1.05862e-07	0.11915	0.112	0.058	0.00226026
H2AFJ	1.07973e-07	0.125222	0.135	0.075	0.00230533
BRWD1	1.08656e-07	0.0595163	0.221	0.14	0.00231991
IFT57	1.11349e-07	0.116125	0.419	0.303	0.00237741
TCTA	1.11417e-07	0.100305	0.126	0.068	0.00237886
ZBP1	1.13006e-07	0.089158	0.161	0.094	0.0024128
EIF3K	1.13061e-07	-0.332772	0.788	0.755	0.00241396
YME1L1	1.16189e-07	-0.00298847	0.283	0.186	0.00248075
VAMP5	1.1738e-07	0.0909459	0.174	0.104	0.00250618
CANX	1.17586e-07	0.065266	0.284	0.191	0.00251057
KDM5B	1.18416e-07	0.108865	0.101	0.05	0.00252831
SAP30BP	1.18649e-07	0.0671014	0.234	0.152	0.00253326
MAT2B	1.18935e-07	-0.540901	0.334	0.385	0.00253937
SEPTIN7	1.19886e-07	-0.503067	0.224	0.287	0.00255969
RBM7	1.20825e-07	0.0758716	0.121	0.064	0.00257974
SLC9A3R1	1.23863e-07	-0.512302	0.164	0.225	0.0026446
RAB5A	1.23898e-07	0.121713	0.128	0.07	0.00264535
MTCH1	1.32941e-07	0.0583035	0.3	0.203	0.00283843
CGGBP1	1.39078e-07	0.0852353	0.284	0.195	0.00296944
SPCS3	1.40817e-07	0.0409579	0.208	0.131	0.00300658
PKN2	1.42e-07	0.16041	0.128	0.071	0.00303185
CHMP1B	1.42723e-07	0.174062	0.143	0.083	0.00304728
STRAP	1.46029e-07	0.0726914	0.322	0.223	0.00311787
LONP2	1.47363e-07	0.114451	0.169	0.102	0.00314636
FOXP1	1.51549e-07	0.0709844	0.69	0.541	0.00323572
SMIM26	1.5539e-07	-0.0300817	0.381	0.264	0.00331773
SNHG6	1.58304e-07	-0.466615	0.256	0.321	0.00337994
PHTF2	1.58595e-07	0.118466	0.221	0.144	0.00338616
TRBC2	1.5971e-07	-0.446716	0.44	0.475	0.00340996
HHEX	1.61916e-07	-0.569367	0.234	0.292	0.00345706
PMPCB	1.62628e-07	0.020731	0.262	0.17	0.00347227
TRIM13	1.63485e-07	0.107859	0.141	0.081	0.00349058
SMAP1	1.74061e-07	0.0600062	0.196	0.121	0.00371638
EDF1	1.74819e-07	-0.441899	0.663	0.631	0.00373257
AIMP1	1.7606e-07	0.0292633	0.261	0.171	0.00375906
UHMK1	1.93173e-07	0.0558465	0.246	0.161	0.00412444
HELZ	1.93759e-07	0.137806	0.163	0.098	0.00413695
RRM2B	1.94073e-07	0.13468	0.102	0.052	0.00414366
CCNK	1.94105e-07	0.0837803	0.166	0.1	0.00414434
2025-09-01	1.94869e-07	0.183199	0.193	0.124	0.00416065
MTHFD2L	2.017e-07	0.0436959	0.104	0.053	0.0043065
SUMF2	2.02304e-07	0.0998481	0.212	0.136	0.0043194
PIM1	2.03775e-07	0.175374	0.169	0.103	0.00435079
KIF5B	2.03893e-07	0.0377621	0.285	0.192	0.00435331
TMED4	2.12132e-07	0.113088	0.262	0.177	0.00452923
PYCR2	2.1417e-07	-0.51324	0.117	0.173	0.00457273
YPEL2	2.16768e-07	0.0848275	0.123	0.067	0.00462821
SLC25A37	2.17789e-07	0.0722109	0.117	0.063	0.00465001
USP12	2.18165e-07	0.117512	0.132	0.075	0.00465805
STAT3	2.21156e-07	0.0882609	0.298	0.206	0.00472191
S100A11	2.34268e-07	-0.413972	0.178	0.243	0.00500186
MYL6	2.34499e-07	-0.259211	0.845	0.818	0.00500678
XRN1	2.4069e-07	0.0975221	0.165	0.099	0.00513897
ITGAE	2.47713e-07	0.01285	0.277	0.187	0.00528891
TBC1D1	2.51001e-07	0.066099	0.2	0.126	0.00535913
DDX6	2.55807e-07	0.0133415	0.408	0.287	0.00546173
UQCRQ	2.58885e-07	0.0722959	0.354	0.256	0.00552745
CSNK1D	2.62664e-07	0.139226	0.208	0.135	0.00560813
LINC00926	2.66913e-07	-0.376282	0.743	0.711	0.00569886
HIST1H1D	2.67443e-07	0.189445	0.167	0.104	0.00571018
SNRPB2	2.68011e-07	0.0254119	0.309	0.211	0.00572231
AP1S2	2.70501e-07	-0.562837	0.198	0.253	0.00577547
CAND1	2.7142e-07	0.0556235	0.161	0.096	0.00579509
ERO1B	2.72118e-07	0.119149	0.103	0.053	0.00581
CDK12	2.75147e-07	0.0379042	0.155	0.091	0.00587467
RAC2	2.78975e-07	-0.230273	0.781	0.774	0.00595639
KHDRBS2	2.85706e-07	0.164836	0.15	0.089	0.00610012
GARS	2.91616e-07	0.0490881	0.146	0.084	0.0062263
PWP1	2.98845e-07	0.0212203	0.317	0.218	0.00638064
USP8	3.05445e-07	0.100208	0.239	0.159	0.00652156
YDJC	3.06786e-07	0.117854	0.204	0.131	0.00655019
TMEM156	3.14343e-07	0.0457423	0.289	0.196	0.00671154
IGHG3	3.1445e-07	0.238766	0.161	0.098	0.00671381
EIF1AY	3.22209e-07	0.0609542	0.33	0.233	0.00687949
IRF2BP2	3.22697e-07	0.105531	0.194	0.123	0.00688991
NIPBL	3.24392e-07	0.0791134	0.267	0.18	0.00692609
DNAJB9	3.25386e-07	0.0922895	0.138	0.079	0.00694731
BTF3	3.2778e-07	-0.218433	0.937	0.919	0.00699844
ACAA2	3.34885e-07	0.0469266	0.129	0.072	0.00715013
AL392172.1	3.48999e-07	0.0427716	0.104	0.053	0.00745147
CD180	3.50537e-07	-0.457253	0.136	0.197	0.00748431
ITPA	3.51041e-07	0.0436193	0.175	0.107	0.00749507
GABARAP	3.57286e-07	-0.35096	0.819	0.777	0.00762841
PRNP	3.64009e-07	0.1407	0.189	0.121	0.00777196
FBXO44	3.66783e-07	0.108447	0.143	0.084	0.00783119
AP3B1	3.6923e-07	0.0554023	0.239	0.158	0.00788344
MBD5	3.75784e-07	0.121897	0.106	0.056	0.00802337
LINC00909	3.77236e-07	0.117393	0.11	0.059	0.00805437
LEMD3	3.77761e-07	0.0835746	0.111	0.059	0.00806558
ARHGEF1	4.13285e-07	0.101859	0.44	0.329	0.00882404
EIF5B	4.17127e-07	0.157037	0.229	0.155	0.00890608
MAP4K2	4.21015e-07	0.0975775	0.208	0.135	0.00898909
ATXN7L3B	4.28482e-07	0.0752055	0.175	0.108	0.00914852
RAB5IF	4.43123e-07	-0.43313	0.056	0.101	0.00946111
GGA1	4.53594e-07	0.101149	0.142	0.083	0.00968468
C15orf40	4.5731e-07	0.0166583	0.206	0.13	0.00976403
TGS1	4.59914e-07	0.0589652	0.162	0.097	0.00981962
SYNGR2	4.81381e-07	-0.331431	0.726	0.709	0.010278
OFD1	4.9289e-07	0.0617952	0.303	0.21	0.0105237
HSPA4	4.9313e-07	0.0236579	0.314	0.216	0.0105288
N4BP2L2	4.96311e-07	0.0906995	0.45	0.336	0.0105967
FTH1	5.06072e-07	-0.123124	0.991	0.994	0.0108051
COX7B	5.14109e-07	0.0646978	0.393	0.287	0.0109767
USP15	5.24179e-07	0.0864706	0.354	0.252	0.0111917
TACC1	5.26721e-07	0.141701	0.175	0.111	0.011246
TARDBP	5.30609e-07	0.024598	0.167	0.102	0.011329
ANXA4	5.40081e-07	-0.522788	0.16	0.217	0.0115313
KMT2E	5.42564e-07	0.051739	0.605	0.457	0.0115843
PIAS1	5.44969e-07	0.0119623	0.295	0.202	0.0116356
UGCG	5.59483e-07	0.106524	0.171	0.106	0.0119455
CBX3	5.69708e-07	0.0497246	0.363	0.26	0.0121638
MYDGF	5.84524e-07	0.0529974	0.23	0.15	0.0124802
TOGARAM1	6.06764e-07	0.096586	0.102	0.053	0.012955
HNRNPH1	6.1864e-07	0.0503919	0.292	0.203	0.0132086
ADK	6.19677e-07	-0.597463	0.343	0.379	0.0132307
ADPRM	6.31676e-07	0.0997821	0.11	0.06	0.0134869
GET4	6.34003e-07	0.0682332	0.112	0.06	0.0135366
RERE	6.37684e-07	0.0884489	0.167	0.104	0.0136152
ZCCHC10	6.4418e-07	0.095639	0.21	0.138	0.0137539
LSM12	6.5343e-07	0.071504	0.15	0.089	0.0139514
ARL4A	6.66252e-07	0.125004	0.195	0.125	0.0142251
CREBZF	6.66757e-07	0.141755	0.164	0.103	0.0142359
CNPPD1	6.78133e-07	0.0297311	0.337	0.234	0.0144788
FAM49A	7.11987e-07	0.117075	0.116	0.065	0.0152016
ZNF655	7.14061e-07	0.115766	0.208	0.137	0.0152459
ECD	7.16616e-07	0.13168	0.12	0.068	0.0153005
CDK5RAP1	7.29543e-07	0.101218	0.102	0.054	0.0155765
CDC42	7.30887e-07	0.0298291	0.641	0.489	0.0156052
DNAJC4	7.43832e-07	0.0116835	0.327	0.229	0.0158816
MAP4K5	7.49521e-07	0.0978338	0.115	0.064	0.016003
DNAJC15	7.64091e-07	0.0181183	0.333	0.236	0.0163141
RAB3GAP1	7.70786e-07	0.127845	0.162	0.101	0.016457
BRD7	7.75976e-07	0.0982538	0.135	0.079	0.0165679
UFL1	7.79774e-07	0.083296	0.177	0.112	0.016649
MANBA	7.8234e-07	0.00110717	0.218	0.14	0.0167037
PPIL4	7.87275e-07	0.110076	0.108	0.058	0.0168091
CNOT2	8.14776e-07	0.00297749	0.233	0.152	0.0173963
AMFR	8.1637e-07	0.0419081	0.109	0.058	0.0174303
FAM208A	8.21473e-07	0.198027	0.118	0.068	0.0175393
FAM204A	8.31404e-07	0.0487619	0.245	0.164	0.0177513
C16orf87	8.38698e-07	0.103212	0.112	0.062	0.017907
WDR43	8.49679e-07	0.0953145	0.157	0.096	0.0181415
LSM6	8.67996e-07	-0.513218	0.178	0.232	0.0185326
TMEM222	8.70701e-07	0.0455648	0.159	0.096	0.0185903
SEL1L3	8.72385e-07	0.00737113	0.302	0.209	0.0186263
CLINT1	8.74771e-07	0.101063	0.223	0.148	0.0186772
RNF114	8.83922e-07	0.0165799	0.254	0.17	0.0188726
MRPL44	8.87082e-07	0.077795	0.15	0.09	0.0189401
NEK9	8.87743e-07	0.0598766	0.161	0.099	0.0189542
CNST	8.88564e-07	0.0904629	0.218	0.144	0.0189717
TMEM80	9.02556e-07	0.0812557	0.15	0.09	0.0192705
BCCIP	9.16263e-07	0.0288286	0.246	0.166	0.0195631
ZNF318	9.19291e-07	0.114881	0.186	0.121	0.0196278
MAPRE1	9.20897e-07	0.0683078	0.188	0.119	0.0196621
MIER1	9.53778e-07	0.104533	0.186	0.12	0.0203641
UBB	9.57384e-07	0.20252	0.803	0.688	0.0204411
BRMS1	9.60629e-07	0.0481182	0.208	0.135	0.0205104
POLR2I	9.6576e-07	-0.0131323	0.223	0.145	0.0206199
DYM	9.71304e-07	0.00365918	0.153	0.091	0.0207383
MLST8	9.72294e-07	0.045081	0.134	0.077	0.0207594
EXOG	1.00339e-06	0.157882	0.101	0.054	0.0214233
ASH1L	1.00833e-06	0.0969106	0.24	0.164	0.0215287
KRR1	1.01122e-06	0.0115686	0.216	0.14	0.0215905
GRHPR	1.034e-06	0.0111938	0.218	0.142	0.0220769
DYNLT1	1.0367e-06	0.111831	0.17	0.107	0.0221345
DDX3X	1.07153e-06	0.0914231	0.251	0.174	0.0228782
LETMD1	1.08356e-06	0.0639588	0.201	0.13	0.023135
NDFIP1	1.12177e-06	0.0384664	0.241	0.16	0.023951
SNRPF	1.12509e-06	-0.0117222	0.337	0.24	0.0240217
MPPE1	1.13242e-06	0.0799587	0.137	0.081	0.0241782
STX5	1.14861e-06	0.0910927	0.185	0.119	0.024524
PTGES3	1.15755e-06	-0.450687	0.495	0.511	0.0247148
C22orf39	1.161e-06	0.0869712	0.181	0.116	0.0247884
CD79B	1.17953e-06	-0.305197	0.82	0.775	0.0251842
BFAR	1.19438e-06	0.0191017	0.188	0.118	0.0255012
TIPRL	1.20005e-06	0.100974	0.151	0.092	0.0256223
SMIM27	1.2185e-06	0.163095	0.157	0.099	0.0260162
RTFDC1	1.27619e-06	0.177854	0.135	0.082	0.0272478
SNHG15	1.28178e-06	0.111482	0.195	0.126	0.0273673
HMGB2	1.28356e-06	0.0542584	0.289	0.201	0.0274052
PDCD7	1.32093e-06	-0.378917	0.069	0.116	0.0282032
ELMO1	1.33242e-06	-0.00476437	0.195	0.125	0.0284485
RAP1B	1.37839e-06	-0.481764	0.386	0.419	0.02943
CCDC124	1.39231e-06	0.045906	0.194	0.125	0.0297273
CHD1	1.39769e-06	0.0692401	0.214	0.142	0.0298421
ESF1	1.40422e-06	0.0909784	0.125	0.072	0.0299815
ILF3	1.49308e-06	0.0229665	0.303	0.211	0.0318786
CDC40	1.49331e-06	-0.000681548	0.272	0.186	0.0318837
TP53I13	1.49664e-06	0.0969634	0.16	0.099	0.0319547
FDPS	1.51544e-06	0.0731115	0.221	0.147	0.0323561
MRPL52	1.53291e-06	0.0629186	0.33	0.238	0.0327293
ARHGEF7	1.55945e-06	0.122055	0.143	0.086	0.0332958
DPEP2	1.56647e-06	0.125047	0.193	0.128	0.0334457
AKAP8L	1.56924e-06	0.0689421	0.144	0.087	0.0335049
SOD1	1.61354e-06	-0.432443	0.476	0.487	0.0344508
HECTD1	1.63081e-06	0.0347372	0.261	0.179	0.0348195
TLE4	1.6564e-06	0.105519	0.148	0.091	0.0353657
C7orf50	1.65925e-06	0.0108947	0.248	0.167	0.0354267
PJA2	1.66108e-06	0.00608898	0.184	0.116	0.0354657
RBM23	1.68684e-06	0.0573832	0.224	0.15	0.0360158
SIDT2	1.75301e-06	0.0331812	0.125	0.072	0.0374284
HNRNPH3	1.7724e-06	-0.00775781	0.406	0.296	0.0378425
RC3H1	1.77645e-06	0.0951175	0.178	0.115	0.0379291
LBR	1.88986e-06	0.092197	0.28	0.201	0.0403505
ZNF92	1.94719e-06	0.0746402	0.213	0.143	0.0415745
SMARCE1	1.96071e-06	0.0497183	0.311	0.223	0.0418631
YWHAE	1.98367e-06	0.0554018	0.214	0.143	0.0423533
C17orf62	1.99862e-06	0.257051	0.174	0.118	0.0426726
RBM8A	2.00043e-06	0.0515826	0.466	0.345	0.0427111
HOOK3	2.00701e-06	0.107126	0.17	0.109	0.0428518
NBDY	2.01909e-06	0.00869072	0.25	0.171	0.0431095
MRPL10	2.02709e-06	0.0493309	0.139	0.082	0.0432803
NKTR	2.05738e-06	-0.037062	0.286	0.196	0.0439272
COG3	2.11506e-06	0.0324451	0.124	0.072	0.0451587
TBC1D5	2.12375e-06	0.0672849	0.228	0.156	0.0453442
CR1	2.18463e-06	0.0854391	0.127	0.074	0.0466441
ZMYM5	2.18746e-06	0.0928038	0.137	0.082	0.0467045
HSPA9	2.21649e-06	0.0487564	0.284	0.199	0.0473243
SYNCRIP	2.22135e-06	0.0958802	0.175	0.113	0.047428
PLEKHJ1	2.22581e-06	0.0106103	0.331	0.234	0.0475232
IFITM2	2.2261e-06	0.126891	0.716	0.579	0.0475294
C6orf89	2.22633e-06	0.0486292	0.11	0.062	0.0475344
VAPA	2.32249e-06	0.0283112	0.4	0.293	0.0495875
WDR33	2.33259e-06	0.0646077	0.214	0.142	0.0498032
CCNI	2.33925e-06	-0.2039	0.895	0.858	0.0499453
RPP21	2.34105e-06	0.194186	0.134	0.083	0.0499839
ATP5PF	2.35619e-06	-0.457954	0.166	0.221	0.050307
UQCR11	2.36959e-06	0.0871855	0.596	0.463	0.0505931
XRN2	2.39851e-06	0.025976	0.272	0.188	0.0512105
RAB30	2.42368e-06	0.03747	0.216	0.145	0.051748
ATP5ME	2.55318e-06	0.155729	0.159	0.1	0.0545129
SRSF11	2.59968e-06	0.0848926	0.467	0.351	0.0555058
ETFB	2.65848e-06	-0.00530234	0.283	0.197	0.0567611
PUM2	2.72996e-06	0.0641398	0.199	0.132	0.0582873
IGHM	2.73414e-06	0.211748	0.756	0.608	0.0583766
C6orf226	2.80165e-06	0.0749554	0.144	0.088	0.059818
ARAP2	2.85889e-06	0.101685	0.156	0.097	0.0610402
TRMT1	2.90355e-06	0.0193273	0.219	0.147	0.0619938
LAMTOR4	2.90469e-06	0.0705946	0.584	0.452	0.0620181
UTP23	2.94472e-06	0.041914	0.157	0.097	0.0628727
CCDC91	2.96556e-06	0.0749403	0.19	0.125	0.0633176
MCUB	2.98391e-06	-0.0236249	0.459	0.335	0.0637094
FAM107B	3.10284e-06	0.111884	0.253	0.18	0.0662486
DOPEY2	3.11567e-06	0.206085	0.112	0.065	0.0665227
XRCC6	3.12801e-06	0.000981121	0.522	0.389	0.066786
ATXN10	3.20195e-06	0.0961841	0.202	0.135	0.0683649
AUP1	3.39597e-06	0.022377	0.516	0.391	0.0725075
BTG2	3.42489e-06	0.00660005	0.437	0.325	0.0731249
TTC32	3.47558e-06	0.123597	0.125	0.075	0.0742072
TIFA	3.51205e-06	-0.438836	0.114	0.164	0.0749857
NDUFS5	3.51685e-06	0.0428851	0.358	0.264	0.0750883
RAB11B	3.59914e-06	0.0299618	0.404	0.301	0.0768451
PAGR1	3.7217e-06	-0.468534	0.107	0.155	0.0794619
SEC63	3.75345e-06	0.0906675	0.193	0.128	0.08014
RBM27	3.80683e-06	0.106378	0.102	0.056	0.0812796
CHD4	3.86606e-06	0.0581593	0.165	0.104	0.0825442
CHIC2	3.88367e-06	0.0494385	0.178	0.114	0.0829202
STX12	4.06562e-06	0.112673	0.159	0.101	0.086805
KBTBD4	4.089e-06	0.115539	0.103	0.058	0.0873043
PTPN18	4.09077e-06	0.0318742	0.21	0.141	0.0873421
ARL6IP1	4.25898e-06	0.060352	0.399	0.297	0.0909335
MED13L	4.31459e-06	0.0766289	0.104	0.058	0.0921209
WASHC2C	4.33413e-06	0.0359629	0.151	0.094	0.092538
RTCA	4.34649e-06	0.0414013	0.111	0.063	0.0928019
MED17	4.36662e-06	0.0452032	0.119	0.069	0.0932316
DPP8	4.55628e-06	0.0769462	0.118	0.069	0.0972811
JPX	4.56015e-06	-0.023358	0.18	0.115	0.0973638
OGFR	4.61147e-06	-0.494984	0.144	0.194	0.0984595
PDCD5	4.65516e-06	0.00880385	0.281	0.197	0.0993923
INTS12	4.66466e-06	0.0800638	0.109	0.062	0.0995951
C14orf119	4.68119e-06	-0.289275	0.064	0.107	0.099948
ATOX1	4.7116e-06	0.0363764	0.16	0.1	0.100597
SPPL2B	4.72534e-06	0.101277	0.121	0.072	0.100891
GALNT2	4.74584e-06	0.0335362	0.137	0.082	0.101328
HNRNPR	4.81364e-06	0.0141073	0.411	0.303	0.102776
TRAF4	4.82417e-06	0.151039	0.142	0.089	0.103001
SPI1	4.85966e-06	-0.531385	0.267	0.311	0.103759
EXOC6	4.87771e-06	0.0700727	0.128	0.077	0.104144
SLC16A7	5.00675e-06	0.119116	0.115	0.067	0.106899
SEC23IP	5.01675e-06	0.0645504	0.103	0.058	0.107113
CAMTA1	5.06787e-06	0.0566377	0.169	0.108	0.108204
TCP11L2	5.24773e-06	0.0666679	0.128	0.077	0.112044
ITFG1	5.28581e-06	0.0706565	0.144	0.089	0.112857
NLRP1	5.42269e-06	0.0673559	0.147	0.092	0.11578
ARPC3	5.47683e-06	-0.206579	0.917	0.891	0.116936
CYLD	5.51296e-06	0.0505296	0.21	0.142	0.117707
RNF41	5.59193e-06	0.0677926	0.171	0.111	0.119393
PABPC1	5.63053e-06	-0.10766	0.961	0.943	0.120217
TMEM175	5.71323e-06	0.0886153	0.166	0.108	0.121983
SRSF4	5.8628e-06	0.042116	0.334	0.242	0.125177
VAT1	5.97668e-06	0.0841796	0.148	0.093	0.127608
CHCHD7	6.05819e-06	0.00809329	0.231	0.158	0.129348
ZNF207	6.10005e-06	-0.00127569	0.375	0.272	0.130242
AGPAT2	6.13809e-06	0.028885	0.127	0.076	0.131054
IMP4	6.22096e-06	-0.00433126	0.208	0.14	0.132824
AKIRIN1	6.26845e-06	0.0868157	0.188	0.126	0.133838
PSMD3	6.37564e-06	0.0284814	0.193	0.127	0.136126
MRPL9	6.54297e-06	0.0488264	0.216	0.146	0.139699
CACUL1	6.56021e-06	0.0649107	0.129	0.078	0.140067
PPP4R2	6.75499e-06	0.110553	0.186	0.125	0.144226
UBA7	6.75585e-06	0.0749373	0.161	0.104	0.144244
VPS4B	6.83066e-06	0.0618099	0.2	0.136	0.145841
SMC3	6.96354e-06	0.0329694	0.186	0.124	0.148679
CLASRP	6.99439e-06	-0.0551599	0.272	0.188	0.149337
PFDN2	7.04106e-06	0.0205277	0.23	0.158	0.150334
TMEM35B	7.07131e-06	-0.319785	0.065	0.107	0.150979
R3HDM1	7.13161e-06	0.0467073	0.107	0.061	0.152267
NUP98	7.13349e-06	0.0312135	0.142	0.087	0.152307
BAX	7.17184e-06	0.0170761	0.392	0.291	0.153126
SLAIN2	7.27275e-06	0.097959	0.103	0.058	0.15528
NCF4	7.27834e-06	-0.0174765	0.326	0.233	0.1554
NUDCD3	7.34254e-06	0.111783	0.123	0.074	0.15677
ARID5A	7.3917e-06	0.171745	0.148	0.096	0.15782
HDAC7	7.40118e-06	0.0758646	0.121	0.072	0.158023
RAB11FIP1	7.53423e-06	0.0771144	0.121	0.072	0.160863
HPS4	7.7149e-06	0.0648814	0.142	0.088	0.164721
EMC6	7.89274e-06	-0.00166654	0.184	0.121	0.168518
FCGR2B	8.0781e-06	0.0214212	0.354	0.26	0.172476
POLE3	8.08089e-06	0.0698	0.187	0.126	0.172535
ARID1B	8.13787e-06	0.0854827	0.222	0.153	0.173752
COIL	8.20635e-06	0.0459721	0.149	0.094	0.175214
PDCD4	8.56704e-06	-0.496418	0.35	0.382	0.182915
XPC	8.58036e-06	0.0745102	0.151	0.097	0.183199
TUBB4B	8.72641e-06	0.0729367	0.175	0.114	0.186318
SKP1	8.76293e-06	-0.366258	0.687	0.638	0.187097
LCK	8.795e-06	-0.355178	0.091	0.138	0.187782
LMO4	8.83148e-06	0.0629121	0.134	0.082	0.188561
COX14	8.8379e-06	0.0205966	0.307	0.224	0.188698
MRPL40	8.84706e-06	0.0341541	0.191	0.126	0.188894
UFD1	9.05914e-06	0.00376202	0.175	0.113	0.193422
AGO3	9.10733e-06	0.0921631	0.101	0.057	0.194451
OXR1	9.1668e-06	0.054199	0.164	0.107	0.19572
ARHGAP15	9.19192e-06	0.0060256	0.402	0.301	0.196257
GOLGA4	9.28062e-06	0.0259124	0.201	0.135	0.19815
WDR45	9.6031e-06	0.0108626	0.18	0.117	0.205036
ENTPD4	9.6511e-06	0.0617333	0.106	0.061	0.206061
APPL1	9.67167e-06	-0.0364589	0.351	0.256	0.2065
DNAJB14	9.8872e-06	0.0581616	0.176	0.116	0.211102
PCED1A	1.00481e-05	0.0696326	0.112	0.065	0.214536
AP1G2	1.00512e-05	0.0561222	0.224	0.156	0.214604
CASP4	1.01698e-05	0.0212959	0.34	0.248	0.217135
SMG7	1.01981e-05	0.0654417	0.104	0.06	0.21774
SYPL1	1.04431e-05	-0.437095	0.476	0.488	0.222971
MKNK2	1.05825e-05	0.0519342	0.19	0.126	0.225947
PYURF	1.06155e-05	-0.533502	0.282	0.319	0.226652
STK4	1.06178e-05	-0.00297369	0.542	0.411	0.2267
ZNF821	1.0753e-05	-0.00024096	0.162	0.103	0.229587
KPNA5	1.09473e-05	0.0658907	0.117	0.07	0.233736
STRADB	1.1001e-05	0.024251	0.173	0.114	0.234881
ZNF721	1.10065e-05	0.081423	0.174	0.116	0.235
TBRG1	1.1228e-05	-0.0773214	0.389	0.281	0.239729
NFE2L2	1.1336e-05	0.0860358	0.169	0.111	0.242035
SUPT5H	1.13882e-05	0.0176133	0.185	0.123	0.24315
BANF1	1.13947e-05	-0.467022	0.264	0.309	0.243287
ZBTB1	1.14699e-05	0.0280359	0.143	0.089	0.244893
RCN2	1.16884e-05	0.034134	0.283	0.204	0.249558
C3orf38	1.17365e-05	0.0800511	0.117	0.07	0.250587
DERL2	1.20441e-05	0.0360527	0.154	0.098	0.257154
KPNA3	1.20918e-05	0.0288313	0.133	0.082	0.258171
PRPF18	1.2265e-05	0.0681057	0.116	0.07	0.261871
MLF2	1.23878e-05	-0.0495763	0.368	0.266	0.264493
CD72	1.25363e-05	0.0256952	0.334	0.25	0.267663
ACTR2	1.29768e-05	0.0379361	0.449	0.347	0.277068
PIGB	1.32629e-05	0.0633129	0.11	0.065	0.283177
TMEM183A	1.32924e-05	0.0193771	0.168	0.109	0.283805
ASCC3	1.33137e-05	0.0858451	0.101	0.058	0.284262
RBM5	1.33979e-05	0.0114043	0.191	0.128	0.286059
TMC6	1.34431e-05	0.0286773	0.28	0.2	0.287023
TCEA1	1.34744e-05	0.0789541	0.582	0.453	0.287692
TIMM17A	1.35243e-05	0.0328004	0.115	0.069	0.288758
CALM1	1.35474e-05	-0.349255	0.748	0.696	0.28925
SNX2	1.39742e-05	-0.373777	0.641	0.613	0.298363
CHD7	1.40086e-05	0.00555124	0.193	0.13	0.299099
RFTN1	1.41215e-05	0.0937858	0.156	0.102	0.301509
PA2G4	1.41464e-05	-0.0343547	0.338	0.243	0.302041
TOPORS	1.42284e-05	0.10045	0.102	0.06	0.303791
ATP6AP1	1.43811e-05	-0.0234177	0.177	0.116	0.307052
STX16	1.51856e-05	0.0512712	0.121	0.074	0.324228
COX5B	1.54415e-05	0.0607437	0.632	0.501	0.329691
KIF20B	1.55076e-05	0.0254757	0.109	0.064	0.331102
TOX4	1.58078e-05	-0.000106257	0.194	0.13	0.337513
VAMP4	1.58541e-05	0.08008	0.111	0.066	0.3385
TTN	1.60764e-05	0.0470215	0.141	0.089	0.343247
YARS	1.61323e-05	0.0256907	0.124	0.075	0.344441
PTPMT1	1.61875e-05	0.022914	0.162	0.106	0.345619
COBLL1	1.65255e-05	0.0412528	0.245	0.173	0.352835
RALA	1.65531e-05	0.0278823	0.155	0.1	0.353425
ROCK1	1.65669e-05	0.0286844	0.305	0.224	0.35372
ARPP19	1.6772e-05	-0.0143599	0.181	0.119	0.358099
SMARCB1	1.68808e-05	-0.00323875	0.442	0.328	0.360422
DNAJB1	1.71279e-05	0.120805	0.188	0.129	0.365699
RLF	1.71329e-05	0.0345187	0.118	0.071	0.365804
TM2D3	1.73062e-05	0.018122	0.155	0.1	0.369505
BOD1L1	1.75825e-05	-0.0194005	0.193	0.131	0.375405
SUMO3	1.78715e-05	-0.0689877	0.286	0.202	0.381574
HMGN1	1.79541e-05	-0.362775	0.656	0.621	0.383337
GLG1	1.8125e-05	0.00837237	0.224	0.155	0.386986
IREB2	1.82507e-05	0.0233703	0.143	0.091	0.38967
TNPO1	1.85113e-05	0.065017	0.115	0.069	0.395236
NFAT5	1.8588e-05	0.0918017	0.126	0.078	0.396872
PIN1	1.86168e-05	-0.00818019	0.259	0.182	0.397486
PARN	1.86826e-05	-0.000336798	0.154	0.098	0.398891
C1orf43	1.88205e-05	0.00881059	0.283	0.205	0.401836
POLD4	1.96734e-05	-0.384265	0.665	0.638	0.420046
ATP5IF1	1.99349e-05	-0.45504	0.192	0.239	0.42563
TTC7A	1.99353e-05	0.0420115	0.12	0.073	0.425639
CAPZA1	2.00252e-05	-0.528351	0.342	0.369	0.427557
WDR83OS	2.01252e-05	-0.0193834	0.519	0.395	0.429693
PLAAT4	2.01625e-05	-0.437857	0.107	0.151	0.430489
TRIM38	2.02519e-05	0.0504752	0.256	0.184	0.432399
PHF20L1	2.02596e-05	0.0431286	0.14	0.089	0.432563
SLIRP	2.06849e-05	0.0752236	0.187	0.129	0.441643
KDM2A	2.09488e-05	-0.00449652	0.177	0.117	0.447278
IFNGR2	2.10408e-05	-0.0218294	0.47	0.355	0.449242
ACAT2	2.10556e-05	0.0882848	0.123	0.076	0.449559
HARS	2.13088e-05	0.0627537	0.142	0.091	0.454964
PLEKHF2	2.1542e-05	-0.461989	0.307	0.35	0.459943
DCP2	2.15555e-05	0.0476319	0.164	0.109	0.460231
SETDB1	2.16469e-05	0.0474918	0.116	0.07	0.462184
ZNF76	2.17284e-05	0.119406	0.11	0.067	0.463923
COPS8	2.17518e-05	0.0119571	0.133	0.083	0.464423
RTF1	2.18661e-05	-0.0167758	0.253	0.179	0.466864
INPP5F	2.20429e-05	0.0698544	0.1	0.058	0.470638
SLTM	2.21314e-05	0.0519501	0.296	0.218	0.472528
PSMB1	2.24006e-05	-0.0320472	0.546	0.409	0.478276
AIDA	2.25662e-05	0.00229495	0.265	0.191	0.481812
TMUB2	2.26702e-05	0.0870181	0.134	0.086	0.484031
TRMT112	2.29466e-05	-0.456265	0.494	0.492	0.489934
UBXN7	2.31044e-05	0.0460076	0.103	0.06	0.493303
PNPLA8	2.32346e-05	1.46997e-05	0.206	0.14	0.496082
A1BG	2.32901e-05	0.0777664	0.161	0.107	0.497266
ACIN1	2.34384e-05	0.0128244	0.238	0.169	0.500433
ARID4B	2.3604e-05	0.023473	0.397	0.301	0.503968
EMC3	2.3968e-05	-0.00780099	0.184	0.123	0.511741
PRKCSH	2.42166e-05	-0.00875764	0.277	0.197	0.517049
CUL4A	2.45234e-05	0.0345062	0.131	0.082	0.523598
MCTS1	2.46471e-05	0.00362614	0.191	0.127	0.52624
NCOA3	2.51267e-05	-0.0413642	0.315	0.231	0.53648
MINOS1	2.53113e-05	0.178053	0.164	0.114	0.540421
PARP14	2.55192e-05	0.00530048	0.187	0.127	0.54486
KAT7	2.56049e-05	0.0870203	0.11	0.066	0.546689
ATP5MC1	2.56278e-05	-0.489364	0.116	0.158	0.54718
SFT2D2	2.58253e-05	0.0598182	0.142	0.092	0.551396
CPSF7	2.59277e-05	0.0920365	0.177	0.12	0.553582
NOL7	2.64695e-05	-0.0322094	0.391	0.29	0.565151
ZFR	2.66324e-05	0.0269913	0.225	0.158	0.568628
BCL2L13	2.71919e-05	0.0322151	0.111	0.067	0.580574
TFAM	2.72773e-05	-0.00748081	0.212	0.147	0.582398
GSK3B	2.76261e-05	0.0561409	0.124	0.077	0.589844
CWC25	2.77037e-05	0.119655	0.121	0.076	0.591503
TUBA1C	2.78925e-05	0.0218425	0.109	0.065	0.595532
WAC	2.79102e-05	0.0175892	0.22	0.154	0.59591
SMC6	2.80286e-05	0.0331285	0.25	0.18	0.598438
PSMC3	2.84126e-05	0.0235588	0.21	0.145	0.606636
EIF3L	2.8626e-05	-0.379373	0.699	0.654	0.611193
RHOG	2.9231e-05	0.0394155	0.399	0.301	0.62411
GNPTG	2.94082e-05	-0.0102167	0.229	0.16	0.627895
G6PD	2.95205e-05	0.0122715	0.151	0.099	0.630292
SDHD	2.96804e-05	-0.496217	0.171	0.216	0.633706
RPL7L1	2.97522e-05	0.144871	0.1	0.06	0.63524
TIMM13	2.97572e-05	0.00325827	0.176	0.118	0.635347
TCTN1	2.98871e-05	-0.409734	0.095	0.139	0.63812
CCNL2	3.08449e-05	0.0402148	0.175	0.118	0.65857
CARHSP1	3.14081e-05	0.0177182	0.142	0.091	0.670595
SIVA1	3.16361e-05	-0.0228178	0.315	0.229	0.675461
EIF3E	3.17527e-05	-0.330045	0.726	0.693	0.677953
GAPT	3.19104e-05	-0.487882	0.204	0.249	0.681319
RBMX	3.2285e-05	0.0227591	0.479	0.366	0.689316
CUEDC2	3.25197e-05	-0.0506947	0.193	0.13	0.694327
TTC17	3.26111e-05	0.0298964	0.276	0.2	0.696279
WDFY1	3.26454e-05	0.0610761	0.104	0.062	0.697012
MPHOSPH8	3.32796e-05	0.0421132	0.423	0.327	0.710552
AKT2	3.35449e-05	0.0368438	0.155	0.102	0.716217
EIF4H	3.3568e-05	-0.0097922	0.373	0.281	0.716711
MLLT10	3.35882e-05	0.0496899	0.132	0.084	0.717142
CDC5L	3.35893e-05	0.0426645	0.142	0.092	0.717166
VCP	3.36109e-05	0.0223953	0.37	0.281	0.717627
SUPT16H	3.37703e-05	0.0707954	0.183	0.127	0.721029
TMLHE	3.40817e-05	0.0794925	0.111	0.068	0.727679
EPSTI1	3.46749e-05	0.000495284	0.142	0.091	0.740343
USP22	3.48568e-05	0.0395867	0.165	0.11	0.744228
ZFYVE27	3.48984e-05	0.0634418	0.113	0.069	0.745116
KIF2A	3.4998e-05	0.042585	0.207	0.147	0.747242
IBTK	3.55792e-05	0.0905519	0.12	0.075	0.759652
LITAF	3.55972e-05	-0.501825	0.334	0.364	0.760035
CRIP1	3.55989e-05	-0.100734	0.616	0.475	0.760072
CAST	3.57907e-05	-0.066825	0.419	0.313	0.764168
PARP9	3.59079e-05	0.0625008	0.116	0.072	0.76667
DUS3L	3.59639e-05	0.0294691	0.112	0.068	0.767864
GRK2	3.62905e-05	0.0659131	0.137	0.088	0.774838
MAPK8IP3	3.65965e-05	-0.029953	0.151	0.098	0.781371
CHCHD2	3.66886e-05	-0.275573	0.763	0.712	0.783338
CTDSP1	3.69292e-05	-0.395931	0.123	0.169	0.788474
FBXO21	3.71594e-05	0.0408691	0.136	0.087	0.793391
PEX16	3.7198e-05	-0.00398227	0.178	0.119	0.794214
LTA4H	3.72026e-05	-0.574173	0.336	0.364	0.794313
EIF4A2	3.72538e-05	-0.336908	0.624	0.591	0.795406
OGA	3.75352e-05	-0.441584	0.09	0.13	0.801414
TUBGCP2	3.76607e-05	-0.00280221	0.166	0.11	0.804094
VPS26A	3.78986e-05	0.0632433	0.148	0.097	0.809172
DMAP1	3.79812e-05	0.0417374	0.103	0.061	0.810937
ASPSCR1	3.87509e-05	0.000587123	0.109	0.065	0.827369
USP11	3.91708e-05	0.0224294	0.186	0.128	0.836335
TWISTNB	3.94123e-05	0.0189923	0.105	0.062	0.841493
PPP1R3E	3.97717e-05	0.0467789	0.113	0.07	0.849166
DDX54	3.9971e-05	0.0289429	0.18	0.123	0.85342
LHPP	4.00219e-05	0.000940803	0.262	0.188	0.854507
TAPBPL	4.01606e-05	-0.0162983	0.11	0.066	0.857469
EGLN2	4.0164e-05	-0.413888	0.169	0.216	0.857541
RSBN1	4.0843e-05	0.0559065	0.183	0.126	0.872038
GADD45GIP1	4.16439e-05	-0.0640928	0.328	0.24	0.889139
UBE2J1	4.19775e-05	-0.060704	0.414	0.306	0.896261
CNIH4	4.23195e-05	0.0589775	0.102	0.06	0.903563
SFXN1	4.23271e-05	-0.0123183	0.109	0.065	0.903725
COPS3	4.29866e-05	-0.0119202	0.185	0.125	0.917806
CD40	4.31164e-05	-0.478681	0.357	0.384	0.920579
BEX4	4.33541e-05	0.0690559	0.158	0.106	0.925653
PPM1K	4.35288e-05	-0.0341321	0.408	0.307	0.929384
LYPLA1	4.41856e-05	-0.0231034	0.31	0.227	0.943406
ANKLE2	4.42593e-05	0.00370406	0.147	0.095	0.944979
USP34	4.42923e-05	0.025489	0.207	0.145	0.945684
HSH2D	4.46272e-05	0.0159866	0.298	0.219	0.952835
APH1A	4.4906e-05	0.0352558	0.49	0.377	0.958788
IL2RG	4.54153e-05	-0.351449	0.651	0.623	0.969663
AFG3L2	4.58934e-05	-0.0014688	0.127	0.08	0.97987
STAU1	4.73287e-05	-0.0135893	0.182	0.123	1
SEL1L	4.81929e-05	0.0134306	0.113	0.07	1
UBE2L6	4.82089e-05	0.000771191	0.315	0.235	1
AC025164.1	4.83995e-05	-0.484205	0.066	0.103	1
WDR48	4.84176e-05	0.0505526	0.111	0.068	1
WDR6	4.90077e-05	0.0463351	0.147	0.096	1
GUSB	5.00269e-05	0.0658551	0.135	0.088	1
CYFIP2	5.00373e-05	-0.0555451	0.366	0.271	1
EP300	5.06561e-05	0.0797496	0.129	0.084	1
IGBP1	5.21151e-05	-0.00405236	0.346	0.257	1
PSMB8-AS1	5.21261e-05	-0.49339	0.289	0.323	1
RNF149	5.29866e-05	-0.00443268	0.188	0.128	1
CBWD2	5.32485e-05	0.0101675	0.139	0.09	1
TRAF3	5.33958e-05	0.0295891	0.13	0.083	1
COX6B1	5.39194e-05	0.0612388	0.648	0.526	1
SP110	5.44656e-05	-0.0215175	0.548	0.431	1
U2AF1L4	5.45316e-05	-0.0373693	0.189	0.128	1
BET1L	5.47079e-05	-0.000142922	0.151	0.1	1
ATG16L2	5.60065e-05	-0.0426078	0.188	0.126	1
AP1B1	5.61728e-05	0.102169	0.201	0.144	1
GEMIN7	5.71635e-05	0.0413105	0.148	0.097	1
CYTH1	5.73665e-05	-0.00165884	0.368	0.279	1
C1QBP	5.74635e-05	-0.472337	0.358	0.379	1
RPA2	5.85784e-05	0.134475	0.114	0.072	1
PPP6C	5.90021e-05	-0.0114589	0.295	0.217	1
ABTB1	5.91626e-05	0.0235894	0.235	0.169	1
SNRPE	5.99657e-05	-0.0135186	0.275	0.199	1
UQCR10	5.99864e-05	-0.0257905	0.532	0.408	1
IRF4	6.03286e-05	0.167821	0.109	0.067	1
FAM3A	6.1e-05	0.0612178	0.122	0.077	1
TNFRSF14	6.16006e-05	-0.0132511	0.46	0.352	1
PRPF38B	6.24364e-05	0.0254627	0.296	0.22	1
TRMT10C	6.27346e-05	-0.00264197	0.174	0.118	1
PARP6	6.30095e-05	0.0692804	0.123	0.078	1
RNF111	6.30451e-05	0.0742385	0.101	0.061	1
DYNC1LI1	6.48877e-05	0.0260213	0.131	0.084	1
SELENOW	6.51104e-05	-0.434664	0.216	0.258	1
NOB1	6.5342e-05	-0.0687561	0.177	0.119	1
TAF3	6.58098e-05	0.0500571	0.158	0.107	1
ATF6B	6.64789e-05	-0.0254602	0.275	0.202	1
FKBP2	6.68507e-05	0.104729	0.117	0.075	1
PRPSAP1	6.70915e-05	0.0462995	0.126	0.08	1
WBP2	6.82769e-05	-0.0058903	0.315	0.235	1
SCIMP	6.84005e-05	-0.437363	0.192	0.237	1
SLC9A7	6.86515e-05	0.0191789	0.154	0.103	1
CDKN1B	6.87734e-05	-0.0319613	0.284	0.206	1
GOLT1B	6.91343e-05	0.0400489	0.112	0.069	1
ZBTB20	6.97831e-05	0.000546259	0.245	0.177	1
PIKFYVE	7.08533e-05	0.0420949	0.177	0.121	1
SNRPA	7.12719e-05	-0.0190104	0.345	0.258	1
BSDC1	7.12988e-05	0.0338184	0.156	0.104	1
PHIP	7.1302e-05	-0.0500262	0.299	0.217	1
C4orf48	7.14574e-05	0.0312905	0.194	0.135	1
SLC25A24	7.19609e-05	0.051713	0.12	0.076	1
DTD1	7.29479e-05	-0.0199664	0.136	0.087	1
JAK3	7.31602e-05	0.0229837	0.142	0.092	1
SNHG1	7.43627e-05	-0.46778	0.124	0.165	1
CUL1	7.51734e-05	0.0557838	0.165	0.113	1
ZNF22	7.57108e-05	0.0399136	0.238	0.173	1
PNRC2	7.59787e-05	-0.00840745	0.37	0.28	1
ASXL1	7.61309e-05	0.0302218	0.164	0.112	1
NOTCH2	7.62457e-05	0.049667	0.183	0.126	1
KMT2C	7.69638e-05	0.0363843	0.207	0.148	1
TAF11	7.74514e-05	0.0337403	0.154	0.104	1
CHCHD5	7.76299e-05	0.0193464	0.166	0.113	1
EIF3M	7.76782e-05	-0.0209165	0.514	0.401	1
RAB8A	7.80637e-05	-0.0292413	0.283	0.207	1
SIPA1L1	7.81627e-05	-0.00196372	0.126	0.081	1
ANKRD17	7.94534e-05	-0.0135779	0.107	0.065	1
STAP1	7.99882e-05	-0.0128476	0.261	0.192	1
CASP8	8.07288e-05	0.0479017	0.18	0.125	1
DCK	8.16694e-05	-0.449022	0.288	0.325	1
CTBP1	8.186e-05	0.00919959	0.118	0.074	1
MRPS36	8.18764e-05	0.0435518	0.205	0.147	1
BIRC2	8.21137e-05	0.0733542	0.116	0.074	1
LTV1	8.27405e-05	0.0240722	0.116	0.073	1
KIAA1143	8.27825e-05	0.0117224	0.132	0.086	1
IER2	8.30863e-05	0.252467	0.448	0.375	1
TAPT1	8.33386e-05	0.084355	0.104	0.065	1
PCBP1	8.33628e-05	0.0660653	0.84	0.69	1
C20orf24	8.53916e-05	0.147612	0.112	0.072	1
RAB2A	8.58733e-05	-0.0573051	0.324	0.239	1
ATP5F1E	8.60018e-05	-0.0061983	0.35	0.482	1
RFC1	8.66823e-05	0.0274078	0.186	0.13	1
TNFRSF13C	8.67951e-05	0.0336816	0.372	0.287	1
DNAJC2	8.81717e-05	0.0212601	0.162	0.109	1
SMYD2	8.87317e-05	0.0286647	0.124	0.079	1
FBXO9	8.97338e-05	-0.00219008	0.146	0.097	1
ZFC3H1	9.07309e-05	0.0758685	0.181	0.126	1
TBC1D17	9.13464e-05	0.00724107	0.147	0.097	1
MTSS1	9.17556e-05	-0.000688684	0.422	0.32	1
CLPP	9.29928e-05	-0.031221	0.2	0.139	1
MTPN	9.37221e-05	-0.00691756	0.499	0.385	1
FAM162A	9.37909e-05	-0.0231904	0.216	0.153	1
RMDN1	9.41589e-05	0.041159	0.115	0.073	1
PHB	9.56967e-05	-0.0798944	0.267	0.191	1
PSME1	9.69547e-05	-0.25154	0.761	0.721	1
PFDN4	9.72204e-05	-0.015436	0.18	0.123	1
TMX4	9.75855e-05	0.0703752	0.22	0.16	1
RASSF1	9.78329e-05	-0.0289543	0.235	0.168	1
CARD11	9.84436e-05	0.0173885	0.142	0.094	1
ARF6	9.96409e-05	-0.507979	0.39	0.403	1
CYP20A1	0.000100047	0.0701566	0.118	0.075	1
ACAP2	0.000100422	-0.0378993	0.397	0.303	1
HDLBP	0.000101114	-0.0254503	0.114	0.071	1
MCM5	0.000102478	-0.0230849	0.212	0.149	1
FBL	0.000102906	-0.47599	0.372	0.39	1
RNF138	0.000103654	8.91659e-05	0.183	0.126	1
TNIP1	0.000105515	-0.0622776	0.316	0.233	1
MCPH1	0.000107832	0.00390667	0.131	0.086	1
DCTN2	0.000107928	-0.0118916	0.235	0.169	1
TSPAN14	0.000109106	0.0453361	0.101	0.062	1
NADSYN1	0.000109411	-0.0285334	0.178	0.123	1
DLST	0.000111188	0.0490669	0.126	0.081	1
ADIPOR1	0.000111582	0.0150805	0.227	0.164	1
PHACTR1	0.000112642	0.0500253	0.133	0.087	1
TMEM60	0.000112959	-0.318427	0.068	0.104	1
PRELID3B	0.00011396	0.0105149	0.205	0.147	1
KMO	0.000115108	-0.359292	0.099	0.14	1
SSRP1	0.000115338	-0.0150498	0.2	0.142	1
CTNNB1	0.000115778	0.0150321	0.167	0.114	1
UFM1	0.000116211	-0.0112761	0.258	0.19	1
PYROXD1	0.000116512	0.0438893	0.105	0.065	1
BRIX1	0.000116853	-0.0238308	0.159	0.108	1
USP3	0.000117422	-0.00220689	0.212	0.154	1
MDH2	0.000119474	-0.032436	0.425	0.323	1
BNIP3L	0.000121126	-0.0565079	0.269	0.197	1
TOR3A	0.000123679	0.0536492	0.227	0.165	1
VPS13C	0.000125431	-0.00048436	0.325	0.246	1
KMT2A	0.000126294	0.0312966	0.209	0.151	1
CDK11B	0.00012788	0.0309509	0.115	0.073	1
NUB1	0.000128078	-0.049193	0.25	0.181	1
DHX15	0.000129831	0.0219916	0.16	0.109	1
GPBP1	0.000131061	0.0200544	0.345	0.269	1
PMS1	0.00013225	0.0365491	0.124	0.081	1
NUP160	0.0001344	0.0522783	0.116	0.075	1
UPF3B	0.00013507	-0.0100388	0.177	0.125	1
HLA-E	0.000135863	0.0846891	0.979	0.928	1
STAG1	0.000136423	0.0639107	0.125	0.082	1
CTSH	0.000137013	-0.0227568	0.401	0.306	1
MAP2K7	0.000138022	0.0297271	0.115	0.073	1
PCF11	0.000140196	-0.0155781	0.244	0.179	1
COA1	0.000140428	-0.0245628	0.187	0.131	1
DHX36	0.000141156	-0.0212656	0.181	0.126	1
DENND3	0.000141188	0.0251569	0.102	0.064	1
MFSD14A	0.000142106	0.0296555	0.156	0.106	1
TSPAN3	0.000145969	-0.0751762	0.432	0.328	1
IRF5	0.00014671	0.0195188	0.152	0.103	1
PPP1R7	0.000151206	-0.0326187	0.219	0.157	1
COX16	0.000151229	-0.0357774	0.289	0.216	1
MCM7	0.000151449	0.0653058	0.12	0.078	1
FOXN3	0.000151499	0.00905255	0.187	0.131	1
GRB2	0.000157481	-0.0425276	0.571	0.442	1
PARP4	0.000160722	0.0178147	0.104	0.065	1
GPATCH8	0.000161674	0.0742224	0.163	0.114	1
LARP7	0.000165869	-0.0207105	0.197	0.139	1
OVCA2	0.000166186	-0.0278988	0.159	0.108	1
MEF2A	0.000169623	0.0143158	0.229	0.167	1
PLD4	0.000170533	-0.423287	0.107	0.147	1
ARID4A	0.00017184	0.0334398	0.204	0.148	1
MOAP1	0.00017281	0.0835688	0.118	0.077	1
DHRS7	0.000174398	-0.411135	0.218	0.258	1
EXOC7	0.000174896	0.0507559	0.125	0.082	1
PSMA2	0.000175266	-0.522779	0.225	0.257	1
TRPC4AP	0.000176307	0.0241013	0.135	0.09	1
VRK2	0.000176647	0.0110835	0.131	0.086	1
FBXW11	0.000177221	0.0720684	0.172	0.122	1
SLU7	0.000178809	-0.0118116	0.209	0.152	1
OSER1	0.000179934	0.0132836	0.215	0.155	1
GRINA	0.000181061	-0.0383235	0.299	0.223	1
FAM53B	0.000183129	-0.0227255	0.116	0.074	1
DEK	0.000183702	0.00628069	0.363	0.282	1
IL10RA	0.000184976	0.0389903	0.209	0.153	1
CCNB1IP1	0.000186157	-0.0301703	0.185	0.128	1
SRRM2	0.000186368	-0.00905926	0.439	0.343	1
APBB1IP	0.000188307	-0.443187	0.298	0.329	1
DRAM2	0.000188367	-0.0317123	0.379	0.294	1
NSD1	0.000188405	0.0355972	0.173	0.121	1
UBR5	0.000188825	0.00628141	0.134	0.089	1
POLDIP2	0.000191358	-0.0268107	0.155	0.105	1
GNG7	0.000191775	-0.0242893	0.421	0.325	1
UHRF2	0.000192832	0.0503267	0.127	0.084	1
NFKB1	0.000193415	0.0453928	0.11	0.071	1
DPP7	0.000193479	-0.0255933	0.402	0.311	1
ASB8	0.000196914	0.00404291	0.134	0.09	1
TPP2	0.000205375	0.0224173	0.121	0.079	1
MRPL28	0.000205638	-0.0257348	0.2	0.142	1
PTK2B	0.000206503	-0.0257432	0.303	0.228	1
COX8A	0.000207498	-0.000674915	0.515	0.406	1
CYBC1	0.000208839	-0.478788	0.128	0.165	1
ZDHHC24	0.000209361	0.0308908	0.121	0.08	1
RBBP4	0.000212357	-0.504378	0.3	0.325	1
BABAM2	0.000212378	0.00594403	0.115	0.074	1
SLC25A1	0.000212474	0.0157981	0.199	0.143	1
ATP5PD	0.000214297	-0.40131	0.14	0.179	1
QTRT1	0.000216553	-0.0136508	0.167	0.117	1
CNTRL	0.000218137	-0.0163886	0.238	0.175	1
RABGGTA	0.000218618	0.0665528	0.109	0.07	1
VPS36	0.00021946	-0.023717	0.224	0.163	1
MRPS34	0.000221466	-0.455161	0.269	0.299	1
FAM50A	0.000224996	0.048187	0.178	0.127	1
RAD23A	0.000225139	-0.0487081	0.451	0.343	1
PTBP1	0.000226356	-0.092798	0.25	0.181	1
GNLY	0.000227698	-0.365889	0.114	0.072	1
C9orf16	0.000231446	-0.448021	0.423	0.429	1
VAMP2	0.000231483	-0.360527	0.459	0.466	1
DENND2D	0.000233275	-0.313483	0.101	0.14	1
LRPAP1	0.000235696	-0.0681588	0.248	0.181	1
ZMYND8	0.000239431	-0.0189929	0.119	0.077	1
PSAP	0.000242955	-0.0806223	0.526	0.413	1
EPN1	0.000243331	0.0251019	0.212	0.155	1
CHMP7	0.000244045	-0.44471	0.148	0.188	1
NDE1	0.000245575	-0.00605708	0.185	0.132	1
B4GALT1	0.000246434	-0.0580405	0.264	0.193	1
PPP2CA	0.000247733	-0.0230039	0.318	0.24	1
SLC3A2	0.000249736	0.0455574	0.164	0.114	1
SH3BP2	0.000251889	0.00314208	0.145	0.098	1
OS9	0.00025199	0.0239068	0.261	0.197	1
SPTBN1	0.000252574	-0.0313384	0.184	0.13	1
UBE2G1	0.000252657	0.0143221	0.201	0.145	1
CHD6	0.000253913	-0.0106493	0.112	0.072	1
SERPINB1	0.000255205	-0.031847	0.335	0.253	1
NUP88	0.00025936	0.014167	0.135	0.092	1
KRAS	0.000261583	-0.024887	0.187	0.132	1
RNGTT	0.000261911	0.0475551	0.163	0.114	1
PREX1	0.000269046	0.0299693	0.115	0.075	1
RAB1A	0.000271095	0.0313342	0.142	0.097	1
OLA1	0.000273971	-0.0372116	0.238	0.173	1
FYTTD1	0.00027538	0.0109913	0.14	0.096	1
EMC4	0.000275984	-0.0410483	0.276	0.206	1
YTHDF2	0.000278157	-0.0211439	0.251	0.186	1
SELENOH	0.000278916	-0.39688	0.608	0.572	1
TIMM23	0.000284552	0.0653702	0.102	0.065	1
LRRFIP2	0.000288963	0.0131868	0.118	0.077	1
FCGRT	0.000291115	-0.0499627	0.148	0.099	1
METTL17	0.000293579	-0.0029156	0.191	0.137	1
MAP1LC3B	0.000295505	-0.0281349	0.403	0.314	1
RAB24	0.000296371	-0.00215378	0.277	0.21	1
TOMM5	0.000296687	0.0140945	0.333	0.259	1
MZT2B	0.000297428	-0.432912	0.313	0.337	1
ATP2B1	0.000298404	-0.00959527	0.34	0.263	1
HGS	0.00029876	0.0421364	0.137	0.094	1
GMDS	0.000299026	0.0237738	0.102	0.065	1
DNAJC1	0.000299063	0.00393469	0.107	0.069	1
PGD	0.000299561	0.000520644	0.142	0.096	1
RAD21	0.00030268	-0.0627623	0.381	0.292	1
PFDN1	0.000305165	-0.0415678	0.223	0.162	1
LATS1	0.000305311	0.0374255	0.111	0.072	1
CCNT2	0.000306116	0.0590622	0.121	0.081	1
HP1BP3	0.000307001	-0.0354026	0.406	0.314	1
HPS1	0.000309756	-0.0119032	0.309	0.237	1
ATP2B1-AS1	0.000310755	-0.00846201	0.253	0.19	1
WDR13	0.000316588	0.0389584	0.136	0.092	1
MARS	0.000318583	0.0767921	0.104	0.067	1
C11orf24	0.000318871	0.052904	0.172	0.123	1
IDH2	0.000319139	-0.0499946	0.205	0.147	1
RBL2	0.000322538	-0.0536754	0.265	0.197	1
MCFD2	0.000328281	0.0354411	0.118	0.079	1
SEPTIN1	0.000328293	-0.361316	0.156	0.194	1
LSM10	0.000329775	-0.474095	0.302	0.327	1
CRCP	0.000331421	0.0701644	0.104	0.067	1
PPP2R3C	0.000331426	0.0454469	0.14	0.096	1
PIGT	0.000332533	0.00239726	0.145	0.1	1
PATL2	0.000339972	0.00262541	0.126	0.084	1
PRDX4	0.000339982	-0.0243516	0.102	0.064	1
NAA50	0.000342206	-0.0108884	0.161	0.112	1
SKAP2	0.000343778	-0.0533028	0.234	0.17	1
CDC42SE2	0.000349176	-0.0149436	0.329	0.251	1
STMN1	0.000352247	0.0778659	0.174	0.127	1
ATP2A3	0.000355099	-0.0168396	0.277	0.21	1
SNW1	0.000359271	0.0177263	0.193	0.142	1
GSTP1	0.000362943	-0.0971161	0.45	0.347	1
UBE2N	0.00036356	-0.441489	0.313	0.34	1
CAPNS1	0.000364899	-0.0447393	0.132	0.089	1
BRD4	0.000368376	-0.0256236	0.226	0.168	1
LGALS9	0.000368889	0.0100111	0.223	0.165	1
CARD8	0.000373375	-0.0198828	0.153	0.106	1
ANKAR	0.000373822	0.0152512	0.101	0.065	1
KPNA1	0.000377103	0.0391578	0.1	0.064	1
FIG4	0.000379027	0.0163961	0.108	0.07	1
STX8	0.000379953	-0.0288872	0.148	0.101	1
MVP	0.000388046	-0.0300515	0.171	0.121	1
POLE4	0.000389591	-0.06886	0.273	0.202	1
TMEM208	0.000394717	-0.011341	0.135	0.091	1
CCNC	0.000402121	0.0382507	0.172	0.123	1
PRKAR2A	0.000403145	0.030707	0.103	0.067	1
SENP6	0.000403512	-0.0294275	0.236	0.175	1
LCOR	0.000404217	0.0606056	0.122	0.082	1
ME2	0.000404823	0.031034	0.123	0.083	1
ABCB7	0.000406664	-0.0342186	0.137	0.092	1
GNG5	0.000407398	-0.385767	0.424	0.435	1
RBBP7	0.000407407	-0.0701668	0.272	0.204	1
ANXA6	0.00040951	-0.432266	0.509	0.493	1
AP2M1	0.000409956	-0.120207	0.381	0.284	1
NELFCD	0.000412644	-0.0447272	0.199	0.142	1
TMEM192	0.000413192	0.0894923	0.11	0.074	1
PPP1CA	0.000413661	-0.348068	0.587	0.564	1
DDX17	0.000414462	-0.0611749	0.504	0.391	1
SERINC1	0.000416674	0.0518085	0.222	0.167	1
ISY1	0.00042246	0.0330189	0.118	0.079	1
ERLEC1	0.000425223	0.0211929	0.146	0.101	1
FIS1	0.000426397	-0.0471844	0.446	0.346	1
ARHGAP45	0.000427432	-0.0279609	0.375	0.288	1
RSL24D1	0.000434341	-0.0596265	0.46	0.352	1
ZNF451	0.000442467	0.0342596	0.108	0.071	1
CEP57	0.000445283	-0.00794268	0.227	0.17	1
ORAI2	0.000450008	-0.00904066	0.333	0.258	1
UCKL1	0.000454696	-0.000432243	0.161	0.113	1
ELOC	0.000457426	-0.0364636	0.26	0.195	1
ARSA	0.000457521	0.0306975	0.11	0.072	1
LUC7L3	0.000463262	0.0214344	0.441	0.345	1
CCNG2	0.000464962	-0.285395	0.078	0.113	1
NRBP1	0.0004663	-0.0148556	0.175	0.126	1
RB1CC1	0.000468061	0.0254331	0.167	0.119	1
SSR3	0.000469457	-0.00513359	0.24	0.181	1
ANKRD13A	0.000469853	-0.0716346	0.212	0.153	1
FADS3	0.000471119	0.0814213	0.132	0.092	1
IP6K2	0.000472243	-0.0536923	0.177	0.125	1
SLC39A1	0.000477287	0.0970911	0.1	0.065	1
METAP2	0.000478479	-0.0234651	0.216	0.16	1
HNRNPM	0.000479348	-0.0701994	0.412	0.316	1
UNC119	0.000483013	-0.102411	0.225	0.164	1
RSRP1	0.0004856	-0.0197644	0.493	0.394	1
RNF7	0.000493342	-0.0443158	0.335	0.255	1
SLC30A9	0.000494131	0.0145058	0.106	0.069	1
SGSM3	0.000494482	-0.0149796	0.207	0.152	1
CCDC186	0.000511743	0.0545459	0.118	0.08	1
NDUFA10	0.000512111	-0.0473124	0.231	0.169	1
TPR	0.000514741	-0.0394017	0.329	0.254	1
TDG	0.000529732	0.0607421	0.123	0.084	1
AFF3	0.000531086	-0.0745572	0.562	0.446	1
PSMB8	0.000534109	-0.377618	0.472	0.474	1
PSMD14	0.000537318	0.0232947	0.126	0.086	1
SCAMP4	0.000537359	0.0535482	0.117	0.079	1
MRPL55	0.000539168	-0.0567456	0.179	0.126	1
DRG1	0.000539506	-0.0377141	0.159	0.112	1
TUSC2	0.000543808	-0.0284613	0.171	0.122	1
ARGLU1	0.000544204	-0.0537269	0.56	0.444	1
EXOC4	0.000550263	0.00453528	0.138	0.096	1
TAF6	0.00055032	0.0239238	0.106	0.07	1
NDUFA2	0.000552418	-0.0386213	0.3	0.23	1
S1PR1	0.000553526	-0.447886	0.171	0.206	1
SFSWAP	0.000555385	-0.0156195	0.161	0.113	1
IGHV3-30	0.000557033	-0.0322384	0.113	0.075	1
MRPS7	0.000557834	-0.0179258	0.231	0.172	1
EMP3	0.000558958	0.122013	0.678	0.576	1
IDH3B	0.000561049	-0.0468007	0.203	0.148	1
PKN1	0.000562198	-0.0280704	0.142	0.098	1
EEF1AKMT2	0.000566759	0.00520689	0.107	0.07	1
IL4R	0.000568592	-0.489733	0.365	0.385	1
SRP14	0.000568747	-0.22843	0.819	0.779	1
TTC3	0.000568901	-0.0322666	0.334	0.257	1
PRDX3	0.000570469	-0.331877	0.105	0.14	1
NAGPA	0.000574413	0.00176746	0.101	0.065	1
GDI2	0.000581054	-0.397541	0.53	0.516	1
PTBP3	0.000582595	-0.00470841	0.24	0.182	1
PPP1R2	0.000582961	-0.0383448	0.474	0.368	1
C17orf49	0.000591754	-0.502046	0.142	0.174	1
UBE2E2	0.000592383	0.0249487	0.151	0.108	1
ARRDC2	0.000595833	-0.0148179	0.15	0.105	1
ACO2	0.00059847	-0.0455266	0.201	0.147	1
SELENOS	0.000601121	0.0487661	0.131	0.091	1
TMA7	0.000617167	0.132595	0.813	0.679	1
PUF60	0.000619131	-0.070718	0.27	0.201	1
IFNAR2	0.000620314	-9.40481e-05	0.167	0.12	1
ZNF296	0.000634383	-0.390027	0.109	0.142	1
EIF3D	0.000636601	-0.401738	0.462	0.457	1
KDELR1	0.000637781	-0.0936434	0.286	0.216	1
CIAO2B	0.000645283	-0.415035	0.117	0.15	1
NAPA	0.000646244	-0.0414839	0.262	0.196	1
SUDS3	0.000647308	0.0151968	0.118	0.079	1
LPP	0.000647536	0.0545557	0.114	0.077	1
WHAMM	0.000654729	-0.0266047	0.15	0.106	1
IMPDH1	0.000658442	-0.00445513	0.129	0.088	1
CCDC25	0.000658572	-0.0454008	0.158	0.111	1
BDP1	0.000664826	0.0210202	0.211	0.158	1
SLC25A5	0.000671614	0.00527188	0.683	0.559	1
PRMT1	0.000682814	-0.124238	0.339	0.257	1
CRTC2	0.00069118	0.0122089	0.159	0.114	1
SLC25A6	0.000695918	-0.153059	0.903	0.864	1
GNPAT	0.00069725	-0.0376303	0.185	0.134	1
NOL12	0.000700291	-0.00631779	0.109	0.072	1
VRK3	0.000701209	0.00330215	0.124	0.085	1
ENO1	0.000703347	-0.0601266	0.482	0.378	1
INTS11	0.000707897	-0.0117456	0.209	0.155	1
RGL2	0.000711419	0.0976451	0.111	0.075	1
HERPUD2	0.000712117	-0.00874242	0.177	0.127	1
CRTC3	0.000720028	-0.0535292	0.131	0.089	1
TNIP2	0.000727293	0.00139836	0.153	0.109	1
SETD2	0.000728208	-0.00597561	0.174	0.126	1
FIP1L1	0.000728694	-0.0722073	0.201	0.147	1
CEPT1	0.000730112	0.0568141	0.166	0.121	1
CHCHD3	0.000744246	-0.0178913	0.18	0.13	1
PIGC	0.000745746	0.038223	0.162	0.118	1
DCAF5	0.000747217	0.0233321	0.112	0.075	1
BLOC1S1	0.000754085	-0.398714	0.303	0.334	1
PPP1R21	0.000765276	0.0564179	0.115	0.079	1
HM13	0.000765887	-0.00830089	0.194	0.144	1
FKBP3	0.000767615	-0.0346855	0.162	0.115	1
NCBP2	0.000768506	-0.0401751	0.19	0.137	1
KCTD20	0.000780125	0.000833162	0.107	0.071	1
ANGEL2	0.000781587	0.082179	0.105	0.07	1
LSM5	0.000783306	-0.0819382	0.283	0.216	1
THUMPD1	0.000784293	0.0119692	0.185	0.135	1
MTX1	0.000786132	-0.035634	0.115	0.076	1
CPNE3	0.000797512	-0.0133544	0.201	0.149	1
SH3BP5	0.000799046	-0.391056	0.378	0.398	1
NGDN	0.000800669	-0.0155355	0.24	0.184	1
TATDN3	0.000801106	-0.0130412	0.103	0.067	1
PMPCA	0.000803088	0.0271815	0.115	0.078	1
TMEM87A	0.000804734	-0.0301264	0.159	0.114	1
TXNL4A	0.000810825	-0.362939	0.18	0.215	1
SUPT4H1	0.000815128	-0.0276492	0.243	0.184	1
DNAJC3	0.000818336	0.0485719	0.115	0.078	1
RNASEH1	0.000827328	-0.00910237	0.136	0.095	1
CDC42SE1	0.000830691	-0.0463008	0.388	0.302	1
HDAC9	0.000842297	-0.0219084	0.196	0.144	1
BCL2	0.000850364	-0.04772	0.2	0.148	1
FAM13B	0.000853392	-0.075167	0.189	0.139	1
PEF1	0.0008537	-0.00952923	0.169	0.121	1
DERL1	0.00086547	-0.002825	0.177	0.129	1
SMAP2	0.000876511	-0.0394986	0.518	0.414	1
SAP18	0.000881727	-0.0235367	0.608	0.484	1
POLR2J	0.000909493	-0.052703	0.259	0.195	1
RNF115	0.000913396	-0.00036926	0.129	0.089	1
ZDHHC21	0.00091541	0.063265	0.104	0.069	1
IGLC3	0.000919326	-0.019343	0.259	0.197	1
EEA1	0.000926276	0.0191542	0.103	0.069	1
BAG5	0.000929771	-0.00631399	0.103	0.068	1
ZFPL1	0.000930528	0.0155839	0.125	0.086	1
HSPB1	0.000936106	-0.34542	0.162	0.197	1
GPSM3	0.000936178	-0.259977	0.747	0.689	1
NUP107	0.000937663	0.0261599	0.148	0.106	1
UBL5	0.00095438	0.0372763	0.544	0.445	1
ARHGAP25	0.000959527	-0.413115	0.188	0.221	1
AP3D1	0.000960416	0.0124271	0.104	0.069	1
MMADHC	0.000960769	-0.395783	0.199	0.235	1
COA5	0.00096573	-0.0200857	0.134	0.094	1
SCAPER	0.000968732	0.0608356	0.119	0.082	1
SESTD1	0.000980291	-0.0153108	0.116	0.079	1
FAU	0.00098504	0.171463	0.997	1	1
KLHL36	0.000994373	0.0332168	0.108	0.073	1
UBE3A	0.00100184	-0.0502008	0.258	0.196	1
PHF5A	0.00100891	-0.0104943	0.163	0.119	1
SLC2A11	0.00101057	0.00119722	0.12	0.082	1
ARMC8	0.00101395	-0.0360195	0.161	0.116	1
CDV3	0.00101822	-0.00357029	0.139	0.099	1
ANKRD11	0.00102525	0.0513975	0.198	0.15	1
BAG1	0.00104493	-0.0594861	0.18	0.131	1
PIN4	0.0010485	-0.0212691	0.155	0.111	1
DCTN3	0.00105353	-0.0462559	0.258	0.197	1
SNX6	0.00105849	-0.0743483	0.336	0.262	1
RIPK2	0.00108399	-0.0232508	0.102	0.068	1
GNB2	0.00108691	-0.423754	0.373	0.386	1
PALM2-AKAP2	0.00108971	-0.437032	0.101	0.131	1
UBE2F	0.00109199	-0.341926	0.08	0.11	1
DNPEP	0.00109513	-0.0601925	0.165	0.118	1
TXNDC11	0.00109704	0.0150527	0.1	0.066	1
ZNF292	0.00111003	0.0169332	0.272	0.213	1
KXD1	0.0011111	-0.0769837	0.246	0.185	1
KCNAB2	0.00111202	0.0233896	0.124	0.086	1
THAP4	0.00111397	-0.0184526	0.124	0.086	1
IKZF1	0.00111542	-0.43183	0.365	0.377	1
CHPT1	0.00111842	-0.0791389	0.284	0.219	1
MGRN1	0.00112146	0.0181033	0.11	0.074	1
RBX1	0.00113428	-0.414406	0.325	0.342	1
TSN	0.00113844	-0.0101204	0.169	0.123	1
PNKD	0.00114197	-0.0540638	0.308	0.238	1
SNX22	0.00114531	-0.390003	0.184	0.218	1
NFKB2	0.00114987	-0.395112	0.142	0.175	1
SMARCA5	0.00116081	0.0172233	0.194	0.146	1
SMG1	0.00116389	-0.0217855	0.24	0.184	1
SLC35E2B	0.00117637	0.0423625	0.105	0.071	1
NXT1	0.0011896	-0.0688694	0.152	0.108	1
NCBP3	0.00118964	0.0590558	0.118	0.082	1
CENPX	0.0011914	-0.0360329	0.157	0.113	1
GABPB1-AS1	0.0011923	-0.375933	0.101	0.133	1
MTG1	0.00119413	-0.0749082	0.232	0.175	1
CELF2	0.00119764	-0.0155867	0.419	0.331	1
ERGIC3	0.00120001	-0.0790847	0.345	0.265	1
ANXA2R	0.00123344	-0.360971	0.107	0.139	1
TBC1D22A	0.0012341	0.00640407	0.215	0.162	1
NAXE	0.00123548	-0.092526	0.226	0.166	1
USF2	0.00124755	0.0502208	0.107	0.074	1
CDKN2AIPNL	0.0012491	-0.00328632	0.135	0.095	1
EPB41L4A-AS1	0.00125767	-0.17286	0.332	0.253	1
PPWD1	0.00125838	-0.021411	0.137	0.097	1
WDR74	0.00125917	0.0666107	0.202	0.153	1
PRDX1	0.00126138	-0.425094	0.343	0.359	1
MED6	0.00126704	0.00850157	0.134	0.094	1
PRDX5	0.00127233	-0.100639	0.454	0.353	1
INTS10	0.00127346	-0.0974577	0.19	0.139	1
RSBN1L	0.00127353	-0.0038355	0.254	0.195	1
FERMT3	0.00127468	-0.0014336	0.216	0.165	1
DDA1	0.00127481	-0.0316153	0.137	0.096	1
STAG2	0.001276	0.00294837	0.208	0.16	1
DNAJB12	0.0012822	0.00105423	0.109	0.074	1
CAMK1D	0.00129399	-0.0438902	0.309	0.24	1
VMA21	0.00129611	-0.0196777	0.117	0.08	1
HCK	0.00129643	0.0446057	0.111	0.077	1
RBM48	0.00130386	-0.00263875	0.119	0.082	1
PPIH	0.00130487	-0.0296937	0.203	0.152	1
SRRT	0.00131343	-0.026368	0.175	0.128	1
AP3S1	0.00131495	-0.0489712	0.251	0.192	1
PTMA	0.00132853	0.0933952	0.994	0.996	1
ING5	0.00132928	0.0234511	0.129	0.091	1
NSFL1C	0.00133103	-0.0591068	0.195	0.145	1
CNTNAP2	0.00133474	-0.250147	0.077	0.109	1
SCNM1	0.00134616	-0.0929058	0.205	0.151	1
SEPHS2	0.00134857	-0.323089	0.139	0.174	1
PPP4R3A	0.00135346	-0.015211	0.195	0.147	1
USP7	0.00135394	0.00748927	0.101	0.068	1
DDAH2	0.00135583	-0.393846	0.172	0.204	1
ADI1	0.00136354	-0.0164942	0.14	0.099	1
FBXO3	0.00136524	0.0409367	0.112	0.077	1
PFKP	0.00136701	-0.0120484	0.104	0.07	1
CYHR1	0.00137101	-0.030881	0.105	0.07	1
UBQLN2	0.00137486	0.035539	0.128	0.091	1
RHOA	0.00137657	-0.204361	0.838	0.791	1
RAN	0.00138639	-0.32148	0.601	0.579	1
GMFG	0.00139129	-0.026484	0.654	0.528	1
NARF	0.00140102	-0.00785214	0.164	0.119	1
DDX46	0.00140329	-0.0405494	0.294	0.228	1
CD63	0.00142515	-0.025253	0.186	0.137	1
PARP8	0.00144742	-0.0237452	0.167	0.121	1
ORAI1	0.00145006	-0.300679	0.121	0.155	1
CAP1	0.0014795	-0.365284	0.452	0.451	1
HERC2	0.00148459	0.0211747	0.123	0.087	1
PPP1R18	0.00148886	-0.402611	0.287	0.314	1
TNFAIP8	0.00150128	-0.340931	0.43	0.443	1
BRD2	0.00150174	-0.084123	0.419	0.325	1
GTF3C5	0.00150562	0.0137939	0.102	0.069	1
PPP6R2	0.00151061	-0.0282158	0.139	0.099	1
MED16	0.00151379	0.00167274	0.109	0.074	1
RALGPS2	0.00152865	0.00455942	0.613	0.489	1
HNRNPA2B1	0.0015295	-0.177846	0.869	0.811	1
AATF	0.00153406	-0.0482708	0.186	0.138	1
IRAK4	0.00154178	-0.0210546	0.172	0.127	1
UTRN	0.00154911	-0.0498427	0.261	0.199	1
ZNF106	0.00155567	-0.0350456	0.17	0.125	1
COX6A1	0.00155693	0.0578208	0.712	0.593	1
OGDH	0.00156095	-0.0325652	0.115	0.079	1
ALKBH7	0.00156293	-0.099741	0.36	0.274	1
NSMCE3	0.00157882	-0.324683	0.11	0.143	1
NUFIP2	0.00158051	0.0449401	0.105	0.072	1
TXNL1	0.00158275	-0.0911443	0.301	0.23	1
KAT6B	0.00158612	-0.0384462	0.147	0.106	1
ABLIM1	0.00159808	-0.0524992	0.174	0.128	1
GSAP	0.00160736	-0.00192959	0.215	0.165	1
PCM1	0.00160905	-0.0571337	0.242	0.183	1
NFU1	0.00162158	-0.021418	0.159	0.116	1
CYP2R1	0.00162219	0.0286442	0.11	0.076	1
MAN2A1	0.00162265	0.0329639	0.107	0.074	1
FAM214A	0.00163407	0.0128344	0.109	0.075	1
NT5C3B	0.00163408	0.0208975	0.102	0.069	1
DNAJC8	0.00163564	-0.104907	0.34	0.264	1
ITGA4	0.00164022	-0.424141	0.333	0.352	1
IL32	0.00165699	-0.665114	0.11	0.14	1
QRSL1	0.00165757	-0.416433	0.246	0.276	1
LINC01215	0.00165865	-0.0167721	0.121	0.085	1
PSMD1	0.00167672	-0.0168634	0.114	0.079	1
EIF6	0.00168853	-0.133167	0.266	0.201	1
UBR2	0.00172146	-0.0344477	0.126	0.088	1
U2AF2	0.00176698	-0.0303752	0.217	0.165	1
ZBED5	0.00178314	-0.0298297	0.145	0.104	1
UBL7	0.00178586	-0.0960407	0.232	0.173	1
USP48	0.00179503	-0.0577289	0.172	0.126	1
YLPM1	0.00180009	0.00105241	0.112	0.077	1
STXBP2	0.00180539	-0.0625725	0.24	0.182	1
HADHA	0.00181743	-0.111922	0.361	0.284	1
ARPC5	0.00182196	-0.380881	0.366	0.383	1
ACP1	0.00182674	-0.0652907	0.372	0.292	1
MAPKAPK5	0.00182979	0.0133688	0.105	0.072	1
NCBP2AS2	0.00183866	-0.379374	0.105	0.135	1
USP39	0.00186097	0.00882798	0.109	0.075	1
PRPS1	0.00189186	-0.0242137	0.181	0.135	1
MRPL41	0.00190524	-0.0680208	0.238	0.181	1
STAT1	0.00193418	-0.0705157	0.17	0.125	1
TIMM9	0.0019713	-0.0212506	0.166	0.123	1
LDHB	0.00198207	-0.44834	0.467	0.455	1
NDUFB10	0.00200631	-0.0819445	0.429	0.337	1
CD200	0.00201551	-0.298963	0.094	0.126	1
ZNF160	0.00202327	-0.0180461	0.102	0.069	1
SSR4	0.00206721	-0.391859	0.6	0.551	1
CCT6A	0.00207659	-0.423923	0.239	0.265	1
COPS6	0.00207925	-0.11172	0.254	0.193	1
VAV1	0.00207942	-0.0072031	0.106	0.073	1
USP47	0.00208561	0.0135906	0.13	0.092	1
S100A6	0.00208742	0.11624	0.554	0.457	1
MPG	0.00210066	-0.0701699	0.288	0.224	1
FAM136A	0.00210114	0.0207171	0.153	0.113	1
PSENEN	0.00213302	-0.0161866	0.164	0.121	1
CXorf38	0.00215292	0.0221593	0.112	0.079	1
NUTM2A-AS1	0.00216552	-0.344551	0.073	0.1	1
CCDC57	0.00217004	-0.0490962	0.125	0.088	1
SMARCC1	0.00217674	-0.0223666	0.212	0.162	1
CSDE1	0.00218304	-0.0750447	0.565	0.447	1
TMED2	0.0021916	-0.09702	0.337	0.26	1
ARFGAP3	0.00221928	0.0431445	0.109	0.076	1
GLIPR1	0.00223622	-0.397691	0.294	0.315	1
NIPSNAP1	0.00225678	-0.0502263	0.112	0.077	1
SRSF9	0.00226819	-0.413394	0.283	0.305	1
EIF4E2	0.00228487	0.0141973	0.165	0.123	1
PPIP5K2	0.00228609	0.0156338	0.112	0.078	1
GRIPAP1	0.0022891	-0.0292444	0.102	0.069	1
NLRC5	0.00230437	0.00327495	0.12	0.084	1
YAF2	0.0023227	0.0134082	0.102	0.07	1
LRRC59	0.00232531	0.00802016	0.125	0.089	1
CCDC85B	0.00233114	-0.424421	0.313	0.328	1
SH3BGRL	0.00233496	-0.352919	0.552	0.525	1
YWHAQ	0.00236642	-0.0767332	0.412	0.326	1
EBP	0.00237172	-0.0432894	0.114	0.079	1
EIF4EBP1	0.00238038	-0.0390563	0.142	0.102	1
HNRNPC	0.00238199	-0.0964559	0.624	0.493	1
UQCRC1	0.00239076	-0.0463989	0.289	0.224	1
MRPS11	0.00239345	-0.0319769	0.112	0.077	1
CD81	0.00241826	-0.0380356	0.172	0.128	1
ZNF800	0.00241943	-0.060969	0.252	0.195	1
NUDT1	0.00241945	-0.0239747	0.121	0.085	1
GYG1	0.00245834	-0.0338559	0.106	0.073	1
HIGD2A	0.00247383	-0.297814	0.571	0.555	1
KANSL1	0.00248037	0.0291962	0.132	0.096	1
OCIAD1	0.00250464	-0.0879812	0.368	0.289	1
BCKDHA	0.00251037	-0.0584327	0.137	0.097	1
MCTP2	0.00260011	-0.0451689	0.121	0.085	1
ABRACL	0.00260265	-0.417231	0.19	0.218	1
BLOC1S4	0.00260928	-0.394797	0.147	0.176	1
NAA15	0.00260984	-0.00332066	0.109	0.076	1
RTL8C	0.00261098	-0.0145256	0.1	0.069	1
C9orf78	0.00261411	-0.131564	0.342	0.264	1
FLOT1	0.00261819	-0.0856263	0.178	0.131	1
NOC2L	0.00263144	-0.0105092	0.15	0.111	1
PRPF31	0.00264276	-0.0406567	0.178	0.133	1
PCMTD1	0.00264746	-0.0241453	0.219	0.169	1
POGZ	0.00267109	-0.00192158	0.144	0.106	1
PQBP1	0.00267446	-0.0788182	0.239	0.183	1
GID8	0.00267738	-0.0234753	0.206	0.158	1
AGPAT5	0.00270346	-0.0231203	0.176	0.133	1
C16orf74	0.00270943	-0.019394	0.24	0.189	1
PHACTR4	0.00271264	0.00804558	0.118	0.084	1
ELP2	0.00271867	-0.0179039	0.124	0.089	1
DBI	0.0027278	-0.0456003	0.525	0.426	1
KIAA1109	0.00277737	-0.048448	0.11	0.077	1
PAPOLA	0.00280623	-0.0668094	0.438	0.353	1
CEBPG	0.00285416	0.0100353	0.104	0.072	1
CGRRF1	0.00292474	0.00354965	0.103	0.072	1
SHOC2	0.0029248	0.00198802	0.229	0.18	1
ECHS1	0.00293912	-0.0761817	0.198	0.15	1
SEC61A1	0.0029458	0.00790696	0.125	0.091	1
DCAF8	0.00295492	-0.0163362	0.177	0.133	1
CUL3	0.00296293	-0.00586633	0.127	0.091	1
LCP1	0.00298272	-0.374598	0.473	0.472	1
SATB1	0.00301423	0.0679787	0.101	0.071	1
TAZ	0.00302096	-0.0137282	0.174	0.13	1
CASC4	0.00302532	-0.0207276	0.12	0.086	1
ARFGAP2	0.00303518	-0.0560489	0.194	0.145	1
ANAPC15	0.00307219	-0.00778806	0.126	0.091	1
LINC01857	0.00313421	-0.0516227	0.153	0.113	1
FDFT1	0.00315259	-0.0615489	0.392	0.318	1
DNAJC7	0.00317102	-0.0839267	0.205	0.155	1
GAK	0.0031812	-0.00739895	0.107	0.075	1
METTL3	0.00318954	0.0291407	0.101	0.071	1
[truncated: 2,008 more rows]
